# Supplementary material
Source: publisher figshare collection journal article supplement (https://gsajournals.figshare.com/ndownloader/files/12264302)
Supplement: Supplementary file 1 [file 12264302]

## Sheet: Hermaphrodite
Hermaphrodite dynamic transcript groups
Transcript expression levels [Tabls S2A] were increased by 1 and log2 transformed
Dynamic transcripts were defined as having a fold difference across sections of ≥2 (log2 >1).
Open reading frame	group ID	1	2	3	4	5	6	7	8	9	10	diffExp	chromosome	chrom_start	chrom_end	strand	wbgene	Gene name	type
K04A8.1	3	0	0	0.217437	0	0	0	0	0	0	1.32086	1.32086	CHROMOSOME_V	6566319	6568730	+	WBGene00019373		cds
R90.5	3	0	0	0.217437	0	0	0	0	0	0	1.32086	1.32086	CHROMOSOME_V	12882062	12885946	-	WBGene00011287	glb-24	cds
AC3.2	3	0	0	0.217437	0	0	0	0	0	0	1.32086	1.32086	CHROMOSOME_V	10372118	10374238	+	WBGene00007070	ugt-49	cds
C24A1.3	3	0	0	0.217437	0	0	0	0	0	0	1.13609	1.13609	CHROMOSOME_III	692504	696451	-	WBGene00016030		cds
F08C6.7	3	0	0	0.217437	0	0.146475	0	0	0	0	1.69921	1.69921	CHROMOSOME_X	7570329	7573629	-	WBGene00006827	unc-98	cds
C06E1.6	3	0	0	0	0	0	0	0	0	0	1.32086	1.32086	CHROMOSOME_III	8590753	8590902	-	WBGene00015521	fipr-16	cds
F01E11.5	3	0	0	0	0	0	0	0	0	0	1.69921	1.69921	CHROMOSOME_X	6996831	7005532	-	WBGene00017157	tyra-2	cds
C11H1.9	3	0	0	0	0	0	0	0	0	0	1.55921	1.55921	CHROMOSOME_X	14318063	14320328	-	WBGene00023500		cds
C33G3.3	3	0	0	0	0	0	0	0	0	0	1.13609	1.13609	CHROMOSOME_X	14064246	14067915	-	WBGene00007903	lgc-21	cds
T20F7.5	3	0	0	0	0	0	0	0	0	0	1.32086	1.32086	CHROMOSOME_X	16845303	16861932	-	WBGene00020632		cds
W04G3.13	3	0	0	0	0	0	0	0	0	0	1.32086	1.32086	CHROMOSOME_X	11079245	11079706	-	WBGene00194793		cds
F48G7.4	3	0	0	0	0	0	0	0	0	0	1.32086	1.32086	CHROMOSOME_V	619435	621504	+	WBGene00018615		cds
C15B12.5	3	0	0	0	0	0.19006	0	0	0	0	1.32086	1.32086	CHROMOSOME_X	6479601	6484773	-	WBGene00001517	gar-1	cds
C03E10.6	3	0	0	0	0	0	0.318328	0	0	0	1.32086	1.32086	CHROMOSOME_V	11271333	11272451	+	WBGene00007283	clec-222	cds
R11A5.3	3	0	0	0	0	0	0.318328	0	0	0	1.52155	1.52155	CHROMOSOME_I	7862837	7863548	-	WBGene00011231		cds
K09E2.4	3	0	0	0	0	0.146475	0.189748	0	0	0	1.13609	1.13609	CHROMOSOME_X	8661224	8671701	+	WBGene00004369	rig-1	cds
C33B4.3	3	0	0	0.217437	0	0	0.189748	0	0	0	1.13609	1.13609	CHROMOSOME_II	11384521	11390798	-	WBGene00006444	shn-1	cds
F45E10.2	3	0	0	0.290991	0	0	0.318328	0	0	0	1.44495	1.44495	CHROMOSOME_II	11052082	11055245	-	WBGene00009729		cds
C47E12.8	3	0	0	0.217437	0.210329	0	0.189748	0	0	0	1.44495	1.44495	CHROMOSOME_IV	9978165	9980749	+	WBGene00000964	dhp-2	cds
C45G9.6	3	0	0.283709	0.217437	0	0	0	0	0	0	1.32086	1.32086	CHROMOSOME_III	5036400	5040366	+	WBGene00016677		cds
C13D9.7	3	0	0	0	0	0.19006	0.472435	0	0	0	1.13609	1.13609	CHROMOSOME_V	4983735	4987183	-	WBGene00003573	ncx-8	cds
DH11.2	3	0	0	0.217437	0	0.19006	0.472435	0	0	0	1.32086	1.32086	CHROMOSOME_II	8012765	8015203	+	WBGene00008436		cds
F21G4.6	3	0	0	0	0	0	1.08957	0	0	0	2.05129	2.05129	CHROMOSOME_X	9908740	9917386	-	WBGene00009027		cds
F58H1.5	3	0	0	0.406354	0	0	0.578957	0	0	0.55692	1.88596	1.88596	CHROMOSOME_V	11958372	11962681	+	WBGene00010288		cds
R12A1.2	3	0	0	0.290991	0	0.19006	0.799629	0	0	0.55692	1.7637	1.7637	CHROMOSOME_V	1393125	1411623	-	WBGene00004925	snt-5	cds
F41E6.6	3	0	0	0.573373	0	0.319239	0.507611	0	0	0	1.32086	1.32086	CHROMOSOME_V	8594890	8597541	+	WBGene00007055	tag-196	cds
B0273.4	3	0.645513	0	1.06876	0.514232	0.508361	0.708702	1.28024	0	1.54899	2.92407	2.92407	CHROMOSOME_IV	5495657	5516256	-	WBGene00006745	unc-5	cds
B0281.5	3	0	0	0.406354	0.183506	0	0.318328	0.560897	0	0.55692	1.52155	1.52155	CHROMOSOME_II	2299853	2300887	-	WBGene00015112		cds
F42A10.2	3	0	0	0.217437	0.183506	0.319239	0.578957	0.966147	0	0.567086	1.69921	1.69921	CHROMOSOME_III	6159790	6164521	+	WBGene00003593	nfm-1	cds
T23H4.2	3	0	0	0.406354	0	0.319239	0.318328	0.966147	0	0.567086	1.55921	1.55921	CHROMOSOME_I	9879180	9881495	-	WBGene00003659	nhr-69	cds
F49E12.2	3	0	0	0.47108	0.941407	1.20869	1.4278	1.9477	1.40028	2.53985	6.07715	6.07715	CHROMOSOME_II	8398109	8399109	-	WBGene00009898	dod-23	cds
F54F7.2	3	0	0	0.290991	0	0	0	1.53965	0.793736	1.76877	5.67345	5.67345	CHROMOSOME_X	11843593	11845271	+	WBGene00010064		cds
T03F1.6	3	0	0	0.217437	0	0	0	0.560897	0	0.55692	1.94278	1.94278	CHROMOSOME_I	3839812	3841561	-	WBGene00020188		cds
F54C8.5	3	1.80254	1.78318	1.31253	2.16915	1.96502	1.97129	1.75805	1.35238	1.53869	2.93779	1.62526	CHROMOSOME_III	9454260	9455948	-	WBGene00010038	rheb-1	cds
C02F5.13	3	2.98199	3.31519	3.00944	3.23057	3.49958	3.66544	3.6358	3.34306	3.32242	4.28969	1.30771	CHROMOSOME_III	8247277	8248745	+	WBGene00015353		cds
T14B4.5	3	0	0	0	0.370268	0.19006	0.472435	0.560897	0	0	1.13609	1.13609	CHROMOSOME_II	6716921	6717802	+	WBGene00020501		cds
C50F7.6	3	0	0	0	0	0	0.578957	0.963749	0	0	1.27633	1.27633	CHROMOSOME_IV	7720555	7723188	-	WBGene00016846		cds
K06A1.3	3	0	0.283709	0.217437	0	0	0.357416	1.28024	0	0	1.55921	1.55921	CHROMOSOME_II	6441396	6443889	+	WBGene00019426	cutl-16	cds
F07A11.4	3	0	0	0	0	0	0	1.28024	0	0	1.44495	1.44495	CHROMOSOME_II	11603890	11611466	+	WBGene00008547		cds
K07E3.4	3	0	0	0	0.183506	0	0	0.966147	0	0	1.27633	1.27633	CHROMOSOME_X	8080823	8083969	-	WBGene00019492		cds
Y57G11C.47	3	0	0	0	0	0	0	0.560897	0	0	1.13609	1.13609	CHROMOSOME_IV	14905032	14909654	-	WBGene00013336	pnc-2	cds
K08C7.1	3	0	0	0	0	0.319239	0.318328	0.966147	0	0	1.32086	1.32086	CHROMOSOME_IV	10656854	10660763	+	WBGene00010646		cds
Y58A7A.1	3	0	0	0	0	0.319239	0.318328	0.560897	0	0	1.13609	1.13609	CHROMOSOME_V	5067562	5069650	-	WBGene00021975		cds
Y77E11A.12	3	0	0.675026	0	0	0.279439	0.578957	0.963749	0	0	1.32086	1.32086	CHROMOSOME_IV	1461921	1475108	-	WBGene00022313		cds
H14E04.5	3	2.1373	2.14332	2.4357	2.71992	3.01626	2.73716	3.25748	2.5226	2.40101	3.58556	1.44826	CHROMOSOME_III	2394319	2401298	-	WBGene00000506	cic-1	cds
ZK892.1	3	0	0	0	0.683918	0.71031	0.318328	1.27832	0.793736	0	1.88596	1.88596	CHROMOSOME_II	9991310	10000287	+	WBGene00002266	lec-3	cds
C18F3.4	3	0.645513	0	0	0	0.146475	1.60576	1.27832	0.863753	0	2.58874	2.58874	CHROMOSOME_IV	8083947	8086638	-	WBGene00044508	nsy-7	cds
Y38F1A.6	3	0.748353	0	0.406354	0.210329	0.71031	0.708702	1.28024	0.863753	0.55692	1.82544	1.82544	CHROMOSOME_II	12994289	12996502	-	WBGene00012608		cds
M176.11	3	0.645513	0	0	0.183506	0.19006	1.01563	0.963749	0	0.567086	1.66507	1.66507	CHROMOSOME_II	9422209	9423293	+	WBGene00010947		cds
Y87G2A.17	3	1.54797	0.283709	0	0	0.437796	1.79296	2.11422	0	0.973102	2.55269	2.55269	CHROMOSOME_I	13491376	13493308	-	WBGene00013603		cds
R07C3.8	3	0.645513	0	0.217437	0	0	0.708702	0.963749	0	0	1.7637	1.7637	CHROMOSOME_II	913687	915214	+	WBGene00019924	fbxc-33	cds
C34G6.6	3	0	0	0.631163	0.183506	0.19006	0	0	0	0	1.13609	1.13609	CHROMOSOME_I	5874436	5878957	-	WBGene00016422	noah-1	cds
Y48G10A.6	3	0	0.52069	0.686727	0	0.437796	0	0	0	0	1.27633	1.27633	CHROMOSOME_I	13451508	13452830	+	WBGene00013023		cds
Y47D3A.16	3	0.748353	1.30212	1.10999	0.909026	0.739939	0.611658	0.966147	0.863753	0.973102	1.94278	1.33112	CHROMOSOME_III	11245090	11251158	+	WBGene00012929	rsks-1	cds
F54D5.7	3	2.05943	2.97077	2.99107	2.71992	2.95793	2.47864	2.64005	2.47865	2.8454	3.73927	1.67984	CHROMOSOME_II	11547417	11549612	+	WBGene00010052		cds
ZK836.2	3	2.46675	3.32319	3.25664	3.06072	3.24774	2.78246	3.02459	3.13202	2.84749	3.95629	1.48955	CHROMOSOME_V	12194459	12205467	+	WBGene00014098		cds
K04G2.5	3	3.86496	4.49833	4.56203	4.45872	4.39524	4.15855	4.18078	4.4966	4.45465	4.88735	1.02239	CHROMOSOME_I	8036938	8038907	-	WBGene00010564	ath-1	cds
C07H4.1	3	0	0	0	0	0	0	0	0.793736	0	1.32086	1.32086	CHROMOSOME_II	9091047	9093634	-	WBGene00007421		cds
C09F9.3	3	0	0	0	0	0	0	0	0.793736	0	1.32086	1.32086	CHROMOSOME_II	14720477	14733449	-	WBGene00007480	glna-1	cds
F35G2.3	3	0	0	0	0	0	0.318328	0	0.793736	0	1.52155	1.52155	CHROMOSOME_IV	12209686	12210715	+	WBGene00009437		cds
W02D9.10	3	0.748353	0	0	0.39386	0.319239	0.189748	0	1.40028	0	2.80583	2.80583	CHROMOSOME_I	12551528	12552360	+	WBGene00012216		cds
Y43F8A.5	3	0	0	0.290991	0.210329	0	0	0	0.793736	0	1.13609	1.13609	CHROMOSOME_V	19384858	19390091	-	WBGene00012811		cds
C31H2.14	3	0	0	0	0.210329	0.319239	0.318328	0.560897	0.863753	0	1.99866	1.99866	CHROMOSOME_X	5148483	5148796	+	WBGene00206484		cds
K03B8.6	3	0.645513	0	0	0.370268	0.146475	0	0	0.863753	0.567086	1.7956	1.7956	CHROMOSOME_V	11407505	11409522	+	WBGene00010524		cds
T10H9.5	3	0.748353	0	0	0	0	0.578957	0	1.71672	0.567086	2.1522	2.1522	CHROMOSOME_V	6662174	6665798	-	WBGene00004062	pmp-5	cds
T14G11.1	3	0.748353	0	0	0	0	0.507611	0	0.793736	0.55692	1.55921	1.55921	CHROMOSOME_X	2688985	2691919	+	WBGene00020510		cds
Y76A2B.5	3	3.93204	3.85337	3.52457	4.11044	3.83859	3.97448	3.88783	4.43175	4.22272	4.72528	1.20071	CHROMOSOME_III	13546786	13548919	-	WBGene00013577		cds
C33B4.4	3	0.748353	0.902484	1.84052	1.41701	1.49141	0.88236	0.963749	1.75407	1.27726	2.37594	1.62759	CHROMOSOME_II	11375588	11376207	-	WBGene00007892		cds
C55B7.2	3	0	0	0.217437	0.39386	0.319239	0	0	0.793736	0.55692	1.32086	1.32086	CHROMOSOME_I	6507895	6511617	+	WBGene00001627	gly-2	cds
K02A4.1	3	0	0	0.290991	0.978778	0.68006	0	0.560897	1.71672	1.27726	1.85602	1.85602	CHROMOSOME_X	12877410	12880255	+	WBGene00001149	bcat-1	cds
W03A5.4	3	2.52244	2.65954	2.59954	2.66411	2.85415	1.99757	2.6408	3.22153	2.8454	3.53962	1.54205	CHROMOSOME_III	5431368	5434428	-	WBGene00020968		cds
C14H10.2	3	0	0.675026	0.406354	0.370268	0.146475	0.189748	0.560897	2.00735	0	1.63011	2.00735	CHROMOSOME_X	10242267	10251295	-	WBGene00007592		cds
F14D12.6	3	0	0	0	0.210329	0	0	0	1.30282	0	0.980726	1.30282	CHROMOSOME_X	5609120	5611215	-	WBGene00006411	octr-1	cds
W09G3.8	3	2.82889	2.89922	2.71561	2.43568	2.86389	2.55893	2.93778	3.58008	2.84331	3.19543	1.1444	CHROMOSOME_I	13812123	13814343	-	WBGene00012371		cds
B0361.9	3	0	0	0	0	1.2679	2.5059	0.560897	1.35238	0.55692	2.10206	2.5059	CHROMOSOME_III	7298284	7299579	-	WBGene00015163		cds
F49B2.5	3	0	0	0.217437	0	0.883516	1.35038	0	0.793736	0.567086	1.66507	1.66507	CHROMOSOME_I	14322225	14328946	+	WBGene00005078	src-2	cds
F31B9.3	3	0	0	0	0	0.357971	1.06369	0	0.863753	0.567086	1.88596	1.88596	CHROMOSOME_X	15923668	15924679	+	WBGene00009280		cds
Y105C5B.21	3	0	0	0.217437	0	0	1.35038	0	0.793736	0.55692	1.52155	1.52155	CHROMOSOME_IV	15997633	16026815	-	WBGene00002175	jac-1	cds
W07G9.2	3	0	0	0	0	0.612866	1.80715	0	0.793736	1.28344	2.05129	2.05129	CHROMOSOME_IV	3791581	3794041	+	WBGene00019546	glct-6	cds
F20B6.9	3	0	0	0.290991	0	0	1.01563	0	0.793736	0	1.13609	1.13609	CHROMOSOME_X	4204578	4206420	-	WBGene00017632		cds
T05A6.1	3	0	0	0.217437	0.183506	0	1.01563	0	0.863753	0	0.924125	1.01563	CHROMOSOME_II	7811189	7812052	+	WBGene00000516	cki-1	cds
F54D1.4	3	0	0	0	0	0	0.937693	0	0.863753	0	1.44495	1.44495	CHROMOSOME_IV	11266270	11268835	-	WBGene00003606	nhr-7	cds
Y71G12B.11	3	0.748353	0	0.290991	0.683918	0.47351	1.60576	0	1.71672	0.567086	2.75805	2.75805	CHROMOSOME_I	1721594	1740920	+	WBGene00022151		cds
C33G8.7	3	0	0	0	0	0	1.24792	0	0	0	0.924125	1.24792	CHROMOSOME_V	6980577	6982151	-	WBGene00016364	nhr-161	cds
T22B7.5	3	0	0	0	0	0.19006	1.08714	0	0	0	0.806592	1.08714	CHROMOSOME_X	5642882	5644905	-	WBGene00005718	srv-7	cds
ZK84.3	3	0	0	0	0	0.508361	1.85033	0	0	0	0.980726	1.85033	CHROMOSOME_II	5998417	5998993	+	WBGene00002088	ins-5	cds
W04A8.1	3	1.70362	2.01381	1.66697	1.30039	2.47637	3.15708	1.9477	2.03796	1.94394	2.6755	1.85668	CHROMOSOME_I	13835137	13840035	-	WBGene00012236		cds
EEED8.8	3	1.16618	1.7598	1.49011	1.28786	1.50618	2.54206	1.75805	1.67837	1.76436	2.58874	1.42256	CHROMOSOME_II	5388809	5389984	-	WBGene00003583	ndx-6	cds
R06C1.6	3	0	0.283709	0	0	0.508361	1.01563	0	0	0	1.27633	1.27633	CHROMOSOME_I	11946992	11953091	+	WBGene00011060		cds
T05G5.1	3	0	0.72418	0	0.183506	0.47351	1.08957	0	0	0.55692	1.69921	1.69921	CHROMOSOME_III	9739008	9743254	-	WBGene00011498		cds
C48B4.4	3	3.73619	3.79298	3.61094	3.30317	3.73138	4.04422	3.79142	3.55913	3.9345	4.33924	1.03607	CHROMOSOME_III	9570131	9579788	-	WBGene00000421	ced-7	cds
Y32H12A.8	3	2.27742	2.92869	2.31131	1.59781	2.87334	3.38297	2.74604	2.88474	3.18465	3.39372	1.79591	CHROMOSOME_III	5385578	5404946	-	WBGene00021316		cds
Y48G1A.5	3	4.40963	4.53542	4.40193	4.0357	5.13823	5.40186	4.93091	4.88787	5.34166	5.74699	1.71129	CHROMOSOME_I	318543	323353	-	WBGene00002079	xpo-2	cds
Y48G1C.9	3	2.20693	2.64685	2.94253	1.83568	3.32597	3.88088	3.25845	3.24795	3.18465	3.32979	2.04519	CHROMOSOME_I	91380	92877	+	WBGene00021682		cds
Y56A3A.7	3	1.16618	1.23587	1.84847	0.683918	1.55946	2.60195	2.2664	1.67837	1.27105	2.33408	1.91804	CHROMOSOME_III	11933894	11946917	-	WBGene00013228		cds
C14B9.2	3	0.748353	0.902484	1.20247	1.17848	0.617587	1.03986	1.75805	0.793736	0.55692	1.7637	1.20678	CHROMOSOME_III	8133599	8136583	+	WBGene00015752		cds
F39H11.1	3	3.24459	3.20082	3.34282	3.23592	2.42122	3.40743	3.51942	2.88474	2.64265	3.70646	1.28523	CHROMOSOME_I	8696595	8698131	+	WBGene00009565		cds
Y71D11A.2	3	3.27935	3.83752	3.3829	3.73907	3.13023	3.80683	3.69029	3.59044	3.25596	4.32813	1.1979	CHROMOSOME_III	1143052	1145210	+	WBGene00004891	smr-1	cds
F07F6.8	3	2.98199	2.60904	2.54534	2.73385	1.8414	2.49809	2.93656	2.85066	2.27555	3.15965	1.31825	CHROMOSOME_II	5424125	5425718	-	WBGene00017220		cds
C34E11.3	3	0.645513	0.902484	0.47108	0	0	0	0	0	0.55692	1.32086	1.32086	CHROMOSOME_X	11826025	11836077	+	WBGene00044079	tag-241	cds
M02F4.8	3	1.75393	1.9145	2.0673	1.55278	1.16244	1.83656	1.53804	1.40028	2.2631	2.89491	1.73247	CHROMOSOME_X	3025052	3026961	+	WBGene00000175	aqp-7	cds
F55A3.1	3	2.82889	2.95981	3.03133	2.06943	2.72979	2.77526	2.64005	2.99038	2.94091	3.33076	1.26133	CHROMOSOME_I	10799612	10806890	+	WBGene00018847	2006-03-01	cds
F33H2.3	3	4.13101	3.90757	3.3829	2.84425	2.45998	4.01299	3.63543	4.21083	4.06564	4.31743	1.85745	CHROMOSOME_I	15034506	15035456	+	WBGene00009367		cds
Y73B6BL.9	3	5.9432	5.91832	4.41874	3.00016	2.91482	4.39204	4.65955	4.18371	4.48866	4.84241	3.02838	CHROMOSOME_IV	6294229	6295209	+	WBGene00001853	hil-2	cds
AC7.2	4	0.645513	0	0.406354	0.370268	0.989631	2.56729	2.26348	2.50079	2.53209	2.24549	2.56729	CHROMOSOME_IV	5126998	5145802	-	WBGene00004929	soc-2	cds
C04A11.4	4	0.748353	0	0.217437	0.183506	1.35272	3.40326	2.64005	3.53787	3.33437	2.7253	3.53787	CHROMOSOME_X	13687903	13695721	+	WBGene00000074	adm-2	cds
F53H8.2	4	0.645513	0	0.290991	0.210329	0.85672	2.75344	2.11422	2.5226	2.52167	2.69254	2.75344	CHROMOSOME_X	950779	954230	+	WBGene00000195	arr-1	cds
B0416.4	4	0	0	0.217437	0	1.08847	2.74533	2.11638	2.27507	2.40385	2.41663	2.74533	CHROMOSOME_X	9278903	9279887	+	WBGene00015180		cds
R09E10.7	4	0	0	0	0.210329	1.11467	2.99532	2.26543	2.45616	2.85165	2.62392	2.99532	CHROMOSOME_IV	10286931	10292986	+	WBGene00004140	pqn-55	cds
F52G3.1	4	0	0	0.217437	0.346283	1.24742	3.50133	2.74673	3.34306	2.937	3.17131	3.50133	CHROMOSOME_X	16963796	16972747	+	WBGene00018710		cds
K08H2.3	4	0	0	0.217437	0	1.04166	3.20776	2.1153	2.88474	2.84957	3.31935	3.31935	CHROMOSOME_X	13237353	13238408	+	WBGene00010690		cds
ZK154.5	4	0	0	0	0	0.989631	3.082	1.94528	3.00595	2.74982	3.13437	3.13437	CHROMOSOME_X	7783136	7787884	-	WBGene00022667		cds
ZK470.5	4	0	0	0.290991	0	0.964751	2.57646	1.94649	2.45616	2.85165	3.0199	3.0199	CHROMOSOME_X	4148625	4153419	-	WBGene00006410	nck-1	cds
C09B8.7	4	0	0.283709	0.406354	0.39386	0.964751	2.2964	1.9477	2.90148	2.74982	2.57042	2.90148	CHROMOSOME_X	6044274	6048575	-	WBGene00003911	pak-1	cds
Y39G8B.1	4	0	0	0.631163	0.183506	0.768972	2.23256	1.53804	2.47865	2.39817	2.17556	2.47865	CHROMOSOME_II	13970509	13972872	-	WBGene00012722		cds
F18H3.1	4	0	0	0	0	0.357971	1.79296	0.963749	1.75407	1.53351	1.59429	1.79296	CHROMOSOME_X	13519593	13521467	+	WBGene00008939		cds
R03E1.1	4	0	0.463942	0.217437	0	0.644543	2.83404	1.53642	2.79798	2.85373	2.70864	2.85373	CHROMOSOME_X	14164569	14169630	-	WBGene00006369	sym-4	cds
F54F7.5	4	0	0	0	0	0.319239	2.39559	1.27832	2.79798	2.40951	2.41754	2.79798	CHROMOSOME_X	11857426	11862296	+	WBGene00003219	mes-1	cds
R08E3.3	4	0	0	0.217437	0.183506	0.19006	1.89225	1.28024	2.45616	2.11406	2.02461	2.45616	CHROMOSOME_X	4818569	4821678	+	WBGene00019959		cds
Y11D7A.13	4	0	0	0.217437	0	0.357971	1.98515	1.28024	2.27507	1.94784	2.33408	2.33408	CHROMOSOME_IV	9270080	9271601	+	WBGene00012436	flh-3	cds
M05B5.5	4	0.645513	0	0.573373	0	1.33054	2.87503	2.52565	3.66596	3.74137	3.8775	3.8775	CHROMOSOME_I	7190846	7193914	-	WBGene00001949	hlh-2	cds
T20B5.3	4	0.645513	0	0	0.183506	0.768972	2.13117	1.75667	2.85066	2.64025	2.58874	2.85066	CHROMOSOME_X	9343198	9347371	-	WBGene00020596	oga-1	cds
C02B4.2	4	0	0	0	0	0	1.73322	0.560897	1.40028	1.75994	1.85602	1.85602	CHROMOSOME_X	12663724	12667782	-	WBGene00003616	nhr-17	cds
W04H10.3	4	0	0	0	0	0.357971	1.83656	0.963749	1.40028	1.76877	1.82544	1.83656	CHROMOSOME_II	595203	602127	-	WBGene00003599	nhl-3	cds
Y46G5A.8	4	0	0	0	0	0.508361	2.31638	0.963749	1.67837	1.94394	1.914	2.31638	CHROMOSOME_II	12756283	12757604	+	WBGene00012900		cds
C02C6.1	4	0	0	0	0	1.55454	2.69041	1.53804	2.83331	3.18465	3.15965	3.18465	CHROMOSOME_X	15568848	15573625	+	WBGene00001130	dyn-1	cds
ZK829.5	4	0	0	0	0	0.993268	2.02211	0.963749	2.32557	2.39532	2.26739	2.39532	CHROMOSOME_IV	11950572	11952181	+	WBGene00006555	tbx-36	cds
C27C12.2	4	0	0	0.217437	0.210329	1.11467	1.85176	0.963749	1.67837	1.94784	2.2222	2.2222	CHROMOSOME_X	14845868	14849125	+	WBGene00007772	egrh-1	cds
F43C1.4	4	0	0	0.217437	0	1.18097	2.23146	1.27832	2.5226	2.26934	3.22982	3.22982	CHROMOSOME_III	4230407	4233192	-	WBGene00003619	nhr-20	cds
R13A1.2	4	0	0	0.573373	0.183506	0.883516	2.26376	0.963749	1.97608	2.12098	2.17556	2.26376	CHROMOSOME_IV	7213202	7217968	+	WBGene00006504	kcc-1	cds
C24H10.5	4	0	0	0.631163	0.39386	0.47351	1.6219	0.966147	1.40028	1.27105	1.40414	1.6219	CHROMOSOME_X	5074365	5078039	-	WBGene00006861	cal-5	cds
ZK770.3	4	0	0.283709	1.09671	0.556656	1.20556	2.86828	2.1153	2.8678	2.26622	2.55269	2.86828	CHROMOSOME_I	3755473	3759076	-	WBGene00002134	inx-12	cds
T04G9.1	4	0	0	0.290991	0	0	1.18184	0.560897	0.793736	0.973102	0.806592	1.18184	CHROMOSOME_X	788352	796155	+	WBGene00020214	attf-5	cds
T07A9.3	4	0	0	0	0	0	1.18184	0.560897	1.30282	0.957729	0.806592	1.30282	CHROMOSOME_IV	405623	410026	-	WBGene00002187	kgb-1	cds
ZC506.3	4	0	0	0.217437	0.183506	0.508361	2.56068	0.966147	2.32557	1.94784	1.7637	2.56068	CHROMOSOME_X	9965437	9968526	+	WBGene00013920	pssy-1	cds
F16B12.4	4	0	0	0	0.210329	0.19006	2.03548	1.28024	1.71672	1.53869	1.94278	2.03548	CHROMOSOME_X	14095674	14098595	-	WBGene00008880		cds
F37B4.10	4	0	0	0	0	0.357971	2.01117	1.27832	2.00735	0.965436	2.02461	2.02461	CHROMOSOME_V	2875758	2877633	-	WBGene00018140		cds
T16G1.9	4	0	0	0	0	0.768972	2.93643	2.11422	2.65703	1.76436	2.74177	2.93643	CHROMOSOME_V	12946801	12950642	-	WBGene00011802		cds
ZC504.3	4	0	0	0.573373	0.210329	0.883516	2.86828	1.9477	2.27507	1.7555	2.58793	2.86828	CHROMOSOME_X	10416577	10419691	-	WBGene00013917		cds
F31F6.2	4	0	0.675026	0	0	1.48367	2.7817	1.9477	3.14614	1.94394	2.53306	3.14614	CHROMOSOME_X	14868945	14870606	-	WBGene00009301		cds
F52D2.2	4	0	0	0	0	0.989631	2.15355	1.53804	2.5226	1.53351	2.33408	2.5226	CHROMOSOME_X	1952473	1953554	-	WBGene00004351		cds
Y59E1A.2	4	0	0	0	0	0.883516	2.15355	1.53804	2.5226	1.53351	2.10206	2.5226	CHROMOSOME_X	1943944	1945025	-	WBGene00021988		cds
F54F7.6	4	0	0	0.290991	0	0.508361	1.94587	1.53804	2.50079	1.28344	1.79419	2.50079	CHROMOSOME_X	11865474	11866993	+	WBGene00010066		cds
F40F9.7	4	3.36085	3.49935	3.50924	3.81055	4.17165	4.7731	4.45617	4.99522	4.54926	4.6708	1.63436	CHROMOSOME_V	9730087	9734003	+	WBGene00009584	drap-1	cds
F57C7.2	4	0	0	0	0.183506	0.47351	2.39559	0.963749	2.47865	0.965436	2.1996	2.47865	CHROMOSOME_X	10576898	10580992	+	WBGene00003733	nhx-5	cds
C06A8.3	4	0	0.283709	0.573373	0.183506	0.85672	2.11985	1.75528	2.03796	2.52167	1.73108	2.52167	CHROMOSOME_II	7790508	7791326	+	WBGene00015514		cds
F07A11.6	4	0	0	0.686727	0	1.34989	2.75999	1.75528	2.30054	2.94287	1.99744	2.94287	CHROMOSOME_II	11614572	11633545	-	WBGene00008549	din-1	cds
C34E11.1	4	0	0	0	0.370268	0.508361	2.42349	1.53804	2.32557	2.85373	1.82544	2.85373	CHROMOSOME_X	11798428	11803589	+	WBGene00004682	rsd-3	cds
F35H12.2	4	0	0	0.217437	0.210329	0.357971	1.35038	0.966147	1.30282	1.95172	1.13609	1.95172	CHROMOSOME_X	924985	932252	+	WBGene00018075	tbc-11	cds
K09E9.1	4	0	0.283709	0.217437	0.556656	0.437796	1.6219	1.27832	1.35238	1.94784	1.13609	1.94784	CHROMOSOME_X	15620421	15626552	+	WBGene00010724		cds
F09B9.2	4	0	0	0	0.183506	0.47351	1.18184	0.560897	0.863753	0.957729	0.742567	1.18184	CHROMOSOME_X	10146833	10152726	+	WBGene00006839	unc-115	cds
F54B11.6	4	0	0	0	0	0.19006	1.93299	0.966147	1.30282	1.53869	0.742567	1.93299	CHROMOSOME_X	13598401	13599605	+	WBGene00000262	bra-1	cds
AH9.3	4	0	0	0.290991	0	0.19006	2.56816	2.26543	2.97465	3.33139	3.59425	3.59425	CHROMOSOME_X	2259144	2260518	-	WBGene00014999		cds
T23C6.3	4	0	0	0	0	0	1.13527	1.27832	1.71672	1.94784	1.96974	1.96974	CHROMOSOME_X	17135936	17138038	-	WBGene00020725	cnp-3	cds
T23F11.4	4	0	0	0	0	0	1.87888	1.9477	2.47865	2.74086	2.62392	2.74086	CHROMOSOME_III	4663147	4665325	-	WBGene00011956		cds
R10D12.8	4	0	0	0	0	0	1.20346	0.963749	1.71672	1.53351	1.73108	1.73108	CHROMOSOME_V	13950721	13953206	-	WBGene00011189		cds
T09B9.4	4	0	0	0	0.346283	0.319239	2.65946	2.26446	3.46643	3.26224	3.46356	3.46643	CHROMOSOME_X	9771656	9774296	-	WBGene00011645		cds
C34D10.1	4	0	0	0.406354	0.210329	0.319239	2.29535	2.40052	2.54409	2.63059	2.99264	2.99264	CHROMOSOME_X	8029429	8031502	+	WBGene00016406		cds
F33C8.1	4	0	0	0.406354	0.183506	0.19006	2.38519	2.11638	2.69594	2.64265	2.6755	2.69594	CHROMOSOME_X	14710405	14718713	+	WBGene00006432	tag-53	cds
H42K12.1	4	0	0	0.217437	0	0	2.36615	2.4014	2.83331	2.74982	2.77344	2.83331	CHROMOSOME_X	1321348	1327980	+	WBGene00003965	pdk-1	cds
F39B1.1	4	0	0	0.217437	0	0	1.6219	1.53804	1.71672	1.94394	1.94278	1.94394	CHROMOSOME_X	15234763	15246296	-	WBGene00009552	piki-1	cds
R04A9.5	4	0	0	0	0	0	1.28894	1.27832	1.30282	1.75105	1.52155	1.75105	CHROMOSOME_X	384383	388800	-	WBGene00019864	ceh-93	cds
Y67A10A.4	4	0	0	0	0	0	1.90688	1.53804	1.75407	2.11406	2.02461	2.11406	CHROMOSOME_IV	14323220	14325638	-	WBGene00013453	fbxa-83	cds
F26D12.1	4	0	0.283709	0.217437	0	0.508361	1.94587	1.75667	1.71672	2.39817	2.17556	2.39817	CHROMOSOME_IV	5584651	5610353	+	WBGene00001439	fkh-7	cds
R04B5.4	4	0	0.283709	0	0	0.357971	2.13117	1.53804	1.71672	2.25997	2.1511	2.25997	CHROMOSOME_V	10082116	10084018	-	WBGene00003611	nhr-12	cds
R03A10.1	4	0	0.463942	0	0	0.19006	2.18875	1.94528	2.5226	3.11311	2.69254	3.11311	CHROMOSOME_X	15429854	15431046	-	WBGene00010981		cds
C43H6.3	4	0	0	0.406354	0.210329	0.644543	1.83656	1.94649	2.30054	2.39817	2.69254	2.69254	CHROMOSOME_X	2407458	2409560	+	WBGene00016616		cds
F59F4.2	4	0	0	1.09671	0.5356	1.58991	3.19163	3.10647	3.70948	4.25632	4.37616	4.37616	CHROMOSOME_X	15841503	15842404	+	WBGene00010337		cds
F53C11.3	4	0	0.463942	0.631163	0.645124	1.04516	2.49809	2.26543	2.45616	2.94482	3.20681	3.20681	CHROMOSOME_V	13782388	13784501	+	WBGene00009973		cds
F32A6.3	4	0	0	0	0.210329	0.357971	1.24792	0.966147	1.40028	1.54385	1.52155	1.54385	CHROMOSOME_X	5283797	5289662	+	WBGene00017974	vps-41	cds
F58G6.1	4	0	0	0	0.370268	0.913667	2.56816	1.9477	2.83331	3.33586	3.2535	3.33586	CHROMOSOME_IV	9644228	9647856	-	WBGene00010272	amph-1	cds
F02E8.1	4	0	0.72418	0.952304	1.66106	1.20556	3.57539	3.6343	3.84122	4.32425	4.5662	4.5662	CHROMOSOME_X	4469718	4471455	+	WBGene00000207	asb-2	cds
C44H4.4	4	0	0	0	0	0.146475	2.22201	1.53804	1.35238	2.11753	2.31219	2.31219	CHROMOSOME_X	14568787	14589018	-	WBGene00008094		cds
F35H12.3	4	0	0	0.406354	0.370268	0.508361	2.83404	2.64005	2.27507	3.57394	3.50187	3.57394	CHROMOSOME_X	915872	918290	+	WBGene00004769	sel-12	cds
K03A1.5	4	0	0	0.290991	0	0.19006	2.35653	1.94649	2.00735	2.75205	3.13548	3.13548	CHROMOSOME_X	7301312	7305525	-	WBGene00006351	sur-5	cds
Y71H10B.1	4	0.645513	0.52069	0.906233	0.5356	1.13711	2.48932	2.11313	2.0973	2.93896	2.88011	2.41827	CHROMOSOME_X	2834211	2840286	-	WBGene00022201		cds
F45C12.15	4	0	0	0	0	0.508361	2.72974	2.40229	1.67837	3.2591	3.20681	3.2591	CHROMOSOME_II	1733686	1736539	-	WBGene00018446	ceh-83	cds
H28G03.6	4	0	0	0.217437	0	0.357971	1.53754	1.53804	0.793736	1.95946	1.85602	1.95946	CHROMOSOME_X	5234637	5243462	-	WBGene00003477	mtm-5	cds
F55A4.5	4	0	0	0.290991	0	0.47351	1.83656	1.75805	1.71672	2.52949	2.02461	2.52949	CHROMOSOME_X	1027668	1035241	-	WBGene00018857	stau-1	cds
T17H7.4	4	0	0	0.406354	0	0.612866	1.97261	1.94649	1.67837	2.8454	2.39689	2.8454	CHROMOSOME_III	727207	752421	-	WBGene00003936	pat-12	cds
K08B12.2	4	0	0	0.217437	0	0.19006	1.40932	1.27832	1.35238	2.12098	1.63011	2.12098	CHROMOSOME_V	6239349	6252436	+	WBGene00019521	dmd-7	cds
R13G10.1	4	0.748353	0	0.723047	0.370268	0.883516	2.54206	2.74673	2.24914	3.39738	2.97943	3.39738	CHROMOSOME_III	3813535	3819661	-	WBGene00001086	dpy-27	cds
M79.1	4	0	0.283709	0.217437	0	0.19006	1.63787	1.94649	1.35238	2.40101	2.33408	2.40101	CHROMOSOME_X	10605769	10624122	-	WBGene00000018	abl-1	cds
W06B11.2	4	0	0.52069	0.406354	0	0.319239	2.10843	2.40052	1.71672	2.85165	2.35564	2.85165	CHROMOSOME_X	5841555	5845953	+	WBGene00004245	puf-9	cds
C15C7.1	4	0	0	0.217437	0	0.19006	1.1126	0.963749	1.40028	1.27726	2.12735	2.12735	CHROMOSOME_X	3164513	3165646	+	WBGene00015789	syx-6	cds
F40H3.1	4	0	0	0	0	0.19006	1.80715	1.27832	1.79048	1.93612	2.35564	2.35564	CHROMOSOME_II	6179926	6184657	+	WBGene00018249		cds
F52H2.5	4	0	0	0	0	0	1.40932	0.963749	1.30282	1.53869	2.12735	2.12735	CHROMOSOME_X	2557967	2559552	-	WBGene00018717		cds
W05H9.2	4	0	0	0	0	0.319239	2.10843	1.75667	1.97608	2.27245	3.12296	3.12296	CHROMOSOME_X	6267013	6270997	+	WBGene00021049		cds
R05H11.1	4	0	0	0	0	0	1.86539	1.94528	1.97608	1.94394	3.12296	3.12296	CHROMOSOME_III	6795584	6797684	+	WBGene00019907		cds
W09C5.5	4	0	0.283709	0	0	0	1.22475	1.28024	1.40028	1.53869	2.05129	2.05129	CHROMOSOME_I	13640294	13648393	-	WBGene00012352	dkf-1	cds
F42A6.9	4	0	0.814436	0.406354	0.39386	0.768972	2.14357	2.1153	2.03796	2.64265	3.04666	3.04666	CHROMOSOME_IV	3342513	3350015	-	WBGene00018330	elks-1	cds
Y73C8B.2	4	0	0.52069	0	0.210329	0.146475	1.53754	1.94649	1.67837	2.40385	3.07235	3.07235	CHROMOSOME_V	3193392	3195000	-	WBGene00022259		cds
C37H5.3	4	0	0	0	0.346283	0.19006	1.94587	1.53642	1.35238	1.7555	2.55269	2.55269	CHROMOSOME_V	4844671	4846941	+	WBGene00016507		cds
R09G11.2	4	0	0	0	0.210329	0.19006	1.4278	0.963749	0.793736	1.27726	1.85602	1.85602	CHROMOSOME_X	17518370	17527484	+	WBGene00003600	nhr-1	cds
F59A3.9	4	0	0	0	0	0.146475	1.53754	0.963749	0.863753	1.54385	2.1511	2.1511	CHROMOSOME_I	5530686	5533713	-	WBGene00019082	pup-3	cds
F46H5.4	4	0	0	0	0	0.612866	1.60576	1.27832	1.30282	1.94784	2.26841	2.26841	CHROMOSOME_X	7245034	7254747	-	WBGene00018520		cds
T04F8.1	4	0	0.283709	0	0	0.612866	2.26376	1.94649	1.71672	2.40385	3.31984	3.31984	CHROMOSOME_X	11659544	11661594	-	WBGene00011440		cds
Y47D9A.2	4	0	0	0	0.183506	0.644543	2.07119	1.94649	1.35238	2.11406	2.92342	2.92342	CHROMOSOME_I	4298260	4302246	+	WBGene00021629	scpl-3	cds
F53C11.8	4	0	0	0.217437	0.370268	0.85672	2.64374	2.26543	2.00735	2.39532	3.1591	3.1591	CHROMOSOME_V	13804382	13807225	-	WBGene00009977	swan-1	cds
W05H7.4	4	0	0	0	0.210329	0.739939	2.49809	1.94528	2.22274	2.26622	2.99325	2.99325	CHROMOSOME_X	1440517	1446689	-	WBGene00021047	zfp-3	cds
T20B5.1	4	0	0	0.47108	0	0.71031	2.42445	2.11638	1.75407	2.11406	2.86515	2.86515	CHROMOSOME_X	9336760	9342892	+	WBGene00000161	apa-2	cds
B0350.2	4	0	0	0.723047	0.210329	0	1.33087	2.11638	1.30282	2.52689	2.77344	2.77344	CHROMOSOME_IV	5966644	6004847	+	WBGene00006780	unc-44	cds
F08F3.3	4	0	0	0.290991	0.346283	0	1.46594	1.9477	1.71672	2.937	2.88077	2.937	CHROMOSOME_V	5428144	5430415	+	WBGene00004358	rhr-1	cds
C07A12.3	4	0	0	0	0.183506	0	1.1599	1.75667	0.863753	1.53869	1.85602	1.85602	CHROMOSOME_X	4532663	4537506	+	WBGene00003628	nhr-35	cds
C30F8.4	4	0	0	0.217437	0.183506	0	1.24792	1.75805	0.793736	1.53351	1.914	1.914	CHROMOSOME_I	5086313	5093809	+	WBGene00002213	kin-32	cds
D1005.1	4	0	0	0	0	0.19006	1.01563	1.53804	0.863753	1.53869	1.69921	1.69921	CHROMOSOME_X	1479535	1484082	+	WBGene00016995		cds
H30A04.1	4	0	0	0	0	0	1.1599	1.75805	0.863753	1.7555	1.88596	1.88596	CHROMOSOME_X	15516587	15523932	+	WBGene00001148	eat-20	cds
F39F10.3	4	0	0	0.290991	0	0.19006	1.6219	2.11638	0.863753	2.27245	2.60684	2.60684	CHROMOSOME_X	16891918	16893075	+	WBGene00018203		cds
VW06B3R.1	4	0	0.283709	0.406354	0.210329	0.19006	2.79037	3.02574	1.67837	3.2638	3.69804	3.69804	CHROMOSOME_X	12018359	12021144	+	WBGene00012158		cds
F02E8.3	4	0	0	0.217437	0.183506	0.768972	1.99628	2.84607	2.06793	3.18465	3.84078	3.84078	CHROMOSOME_X	4458247	4459242	+	WBGene00000157	aps-2	cds
F21A10.2	4	0	0	0.406354	0.183506	0.357971	1.68633	2.26543	1.67837	2.41234	3.20734	3.20734	CHROMOSOME_X	10181079	10194317	-	WBGene00008999		cds
T20F7.6	4	0	0	0	0.370268	0.357971	1.24792	1.94649	1.30282	1.76436	2.70939	2.70939	CHROMOSOME_X	16865995	16868960	-	WBGene00020633	aakg-2	cds
K04A8.6	4	0	0	0.217437	0	0.357971	1.76416	1.75528	1.35238	2.26622	2.92342	2.92342	CHROMOSOME_V	6533598	6538045	-	WBGene00001089	dre-1	cds
R09F10.3	4	0	0	0.217437	0	0.357971	1.58772	1.75805	1.30282	2.74759	2.97943	2.97943	CHROMOSOME_X	8294573	8296720	+	WBGene00019987		cds
C43G2.2	4	0	0	0.406354	0	0.19006	0.799629	0.966147	0.863753	0.965436	1.52155	1.52155	CHROMOSOME_IV	6565889	6572327	-	WBGene00016611	bicd-1	cds
F41B4.1	4	0	0	0.217437	0	0	0.578957	0.966147	0.863753	0.965436	1.44495	1.44495	CHROMOSOME_X	6823851	6825798	-	WBGene00018257		cds
H20J18.1	4	0	0	0.406354	0.514232	0.71031	1.83511	2.26543	1.71672	1.75994	3.36211	3.36211	CHROMOSOME_X	12503893	12513979	-	WBGene00004739	scd-1	cds
T21E3.3	4	0	0	0.47108	0.683918	0.71031	1.94587	1.94649	1.35238	1.94394	2.75805	2.75805	CHROMOSOME_I	3935272	3953945	-	WBGene00003072	lrp-2	cds
F10G8.5	4	0	0	0.406354	0	0.883516	1.68633	1.75805	1.71672	2.11406	2.85072	2.85072	CHROMOSOME_I	10033532	10034813	-	WBGene00003564	ncs-2	cds
F45E1.7	4	0	0	0	0	0.357971	0.578957	0.560897	0.793736	0.965436	1.27633	1.27633	CHROMOSOME_X	7988892	7998086	-	WBGene00018467	sdpn-1	cds
K07C11.2	4	5.44741	5.52121	5.75556	5.4843	5.83867	5.91291	6.08976	6.09951	6.39942	6.61833	1.17092	CHROMOSOME_V	8221390	8223567	+	WBGene00000098	air-1	cds
R05H5.3	4	5.69394	5.72732	5.78776	5.91879	6.38107	6.5948	6.78148	6.56688	7.183	7.08707	1.48906	CHROMOSOME_II	10197341	10198544	+	WBGene00011038		cds
Y54F10AL.2	4	3.34453	3.57402	3.68358	3.59406	4.13185	4.58247	4.88525	4.60288	5.29124	5.4286	2.08406	CHROMOSOME_III	2473858	2486616	+	WBGene00004884	smg-6	cds
T09F3.1	4	0	0.675026	0.217437	0.210329	0.768972	1.35038	1.53642	1.40028	2.64265	2.4769	2.64265	CHROMOSOME_II	10385273	10388073	+	WBGene00011661	ztf-27	cds
B0001.6	4	0	0	0.217437	0	0.508361	2.44274	3.32837	2.83331	3.52095	2.90891	3.52095	CHROMOSOME_IV	12156816	12164252	+	WBGene00007091		cds
cTel55X.1	4	0	0.283709	0	0	0.319239	2.79823	3.51983	3.11776	3.52487	2.89425	3.52487	CHROMOSOME_X	17714890	17718641	+	WBGene00007068		cds
C04F6.4	4	0	0	0.290991	0.183506	0.47351	2.52499	3.18395	2.715	3.10441	3.19543	3.19543	CHROMOSOME_X	3408650	3411669	-	WBGene00006810	unc-78	cds
T28F12.2	4	0.748353	0.675026	0.982581	0.664651	1.18097	2.78246	3.52065	2.81575	3.40165	3.35142	2.856	CHROMOSOME_V	4497449	4511435	+	WBGene00006796	unc-62	cds
ZC8.6	4	0.645513	0.283709	0.533026	0.210329	0.883516	2.9371	3.74209	3.08882	3.39881	3.51151	3.53176	CHROMOSOME_X	4972529	4997567	-	WBGene00022501		cds
C36E6.1	4	0	0.463942	0.217437	0.492542	0.644543	2.75999	3.63543	2.85066	3.46457	3.66427	3.66427	CHROMOSOME_X	17434372	17438007	+	WBGene00016489		cds
F54D10.1	4	0	0	0	0	0.19006	2.43459	3.68956	3.2348	3.39738	3.67288	3.68956	CHROMOSOME_II	3824149	3824782	+	WBGene00004821	skr-15	cds
ZK455.1	4	0	0.283709	0.217437	0.183506	0.319239	1.89225	2.6408	2.27507	2.40101	2.45708	2.6408	CHROMOSOME_X	11339808	11343504	+	WBGene00000040	aco-1	cds
K02B9.2	4	0	0.463942	0	0	0.437796	3.24635	3.84076	3.43227	3.79888	3.89233	3.89233	CHROMOSOME_X	13922711	13926108	-	WBGene00010493	meg-2	cds
T10B10.2	4	0	0	0	0.346283	0.319239	1.7016	2.74604	2.00735	2.26934	2.4769	2.74604	CHROMOSOME_X	15173832	15178056	+	WBGene00011679		cds
B0403.4	4	0.748353	0.283709	1.69434	0.994295	1.14039	4.6789	5.53036	4.69951	4.71542	4.50458	5.24665	CHROMOSOME_X	7066301	7068519	-	WBGene00015168	tag-320	cds
C36B7.6	4	0	0	0.573373	0	0.357971	2.66807	3.6358	2.47865	3.02498	2.49557	3.6358	CHROMOSOME_X	7097420	7100297	-	WBGene00016469		cds
F13E6.1	4	0	0.283709	0.825618	0.210329	0.437796	2.60195	3.45837	2.715	3.02498	2.93779	3.45837	CHROMOSOME_X	10675636	10677048	-	WBGene00008745		cds
C44C8.6	4	0	0	0.406354	0	0.357971	1.87888	1.94649	2.24914	2.11753	2.26841	2.26841	CHROMOSOME_IV	884909	890187	+	WBGene00007007	mak-2	cds
C52B9.4	4	0	0	0.631163	0	0.508361	2.46174	2.40229	2.63717	2.40101	2.64079	2.64079	CHROMOSOME_X	4260628	4264581	+	WBGene00016867		cds
K05B2.2	4	0	0	0.406354	0	0.644543	2.88315	3.02401	3.22153	2.74759	3.35142	3.35142	CHROMOSOME_X	4907260	4912293	+	WBGene00019403		cds
F28H6.6	4	0	0	0.406354	0	0.146475	2.03548	2.40229	2.27507	2.11753	2.51486	2.51486	CHROMOSOME_X	14117042	14125805	-	WBGene00009234		cds
ZC504.4	4	0	0	0.406354	0	0.319239	2.38617	3.10755	3.11776	2.84957	3.34113	3.34113	CHROMOSOME_X	10421595	10428590	-	WBGene00003247	mig-15	cds
T26C11.6	4	0	0	0.573373	0.346283	0.357971	2.9031	2.84542	3.14614	3.02866	2.90956	3.14614	CHROMOSOME_X	1849625	1852730	-	WBGene00000444	ceh-21	cds
ZK721.1	4	0	0	0.631163	0	0.19006	3.10635	3.25748	3.73773	3.02682	3.09759	3.73773	CHROMOSOME_X	8792107	8796041	+	WBGene00006477	tag-130	cds
F38B7.3	4	0.748353	0.283709	0.775244	0.210329	0.508361	2.91693	3.45964	3.73773	2.84957	3.40364	3.5274	CHROMOSOME_V	11549283	11551542	+	WBGene00009534		cds
F46A9.6	4	0.645513	0.675026	0.858642	0.183506	0.71031	3.25155	3.93464	4.0548	3.11311	3.72277	3.87129	CHROMOSOME_I	9441007	9450724	-	WBGene00003172	mec-8	cds
T23C6.1	4	0	0	0.217437	0	0.279439	1.71828	2.11422	2.06793	1.53869	1.7637	2.11422	CHROMOSOME_X	17151446	17154513	+	WBGene00007011		cds
F08F1.8	4	0.748353	0	1.02631	0	0.508361	3.03931	3.74174	3.26099	3.46729	3.75522	3.75522	CHROMOSOME_X	8422426	8423680	-	WBGene00006649	tth-1	cds
F22F4.2	4	0.748353	0.463942	1.63907	0.370268	1.11467	3.90815	4.63216	4.12426	4.48196	4.56074	4.2619	CHROMOSOME_X	5996119	5998216	+	WBGene00002125	inx-3	cds
F14F4.3	4	0.645513	0.463942	0.982581	0	0.612866	2.4437	2.84607	3.10336	2.65224	3.31935	3.31935	CHROMOSOME_X	14938182	14946249	-	WBGene00003411	mrp-5	cds
F14F11.1	4	0	0	0	0	0	1.40932	1.53804	1.79048	1.76436	1.52155	1.79048	CHROMOSOME_II	8305694	8321421	-	WBGene00008819	shw-1	cds
T11F9.11	4	0.645513	0.675026	0.406354	0.664651	0.508361	3.26189	3.74174	3.79717	3.46185	3.1591	3.39082	CHROMOSOME_V	11489031	11490343	-	WBGene00000982	dhs-19	cds
F25B4.2	4	0	0	0	0	0.19006	2.21027	2.84607	3.02135	2.51905	2.70864	3.02135	CHROMOSOME_V	5709402	5712311	+	WBGene00017766		cds
W08E3.2	4	1.23863	1.66594	1.69434	1.6646	1.47128	3.50432	4.14353	4.16995	3.9345	3.85497	2.93132	CHROMOSOME_I	13333345	13336132	-	WBGene00012343		cds
Y119C1B.5	4	0	0.463942	0.47108	0	0	2.65864	2.52565	2.97465	2.84749	2.45708	2.97465	CHROMOSOME_I	4511441	4516084	-	WBGene00022471		cds
B0280.8	4	0	0	0.47108	0.39386	0.357971	3.08721	2.93901	2.65703	3.10441	3.0199	3.10441	CHROMOSOME_III	7112238	7115378	-	WBGene00003609	nhr-10	cds
C05G5.4	4	0	0.283709	0.573373	0.909026	0.829417	3.1802	3.2565	2.94265	3.46185	3.6556	3.6556	CHROMOSOME_X	14753955	14756390	+	WBGene00007350	sucl-1	cds
F28B4.2	4	0	0	0.217437	0.210329	0.47351	2.11985	1.94649	2.0973	2.27245	2.39689	2.39689	CHROMOSOME_X	3210463	3220357	-	WBGene00017891	rgl-1	cds
F53A10.2	4	0	0	0	0.346283	0.508361	2.74533	2.52647	2.63717	2.74535	2.74177	2.74535	CHROMOSOME_II	1197381	1230787	+	WBGene00018734		cds
K10B3.8	4	0	0.283709	0.573373	0.645124	1.11467	3.89492	4.25471	4.28299	4.21789	4.13897	4.28299	CHROMOSOME_X	3113424	3114761	-	WBGene00001684	gpd-2	cds
F16B12.6	4	0	0	0.573373	0.370268	0.883516	3.29299	3.3279	2.83331	3.32691	3.61227	3.61227	CHROMOSOME_X	14102290	14107846	+	WBGene00008882		cds
F25H2.1	4	0	0	0.406354	0	0.768972	3.08782	3.25699	2.83331	3.18465	3.75522	3.75522	CHROMOSOME_I	10536055	10538075	-	WBGene00006578	tli-1	cds
T01C8.1	4	0	0.283709	0.290991	0.210329	0.739939	3.02117	3.18343	2.715	3.18795	3.36211	3.36211	CHROMOSOME_X	16796014	16803299	+	WBGene00020142	aak-2	cds
Y26E6A.1	4	0	0	0.217437	0	0.939435	2.60195	2.93778	2.50079	2.75205	3.04607	3.04607	CHROMOSOME_X	13914734	13917105	-	WBGene00012512	ekl-5	cds
F20D1.3	4	0.645513	0	0.952304	0.370268	1.40914	3.75866	3.7921	3.70948	4.06474	4.27945	4.27945	CHROMOSOME_X	14976045	14978651	+	WBGene00008975		cds
F38A5.7	4	0.645513	0	0.906233	0.514232	1.24742	3.38868	3.51983	3.44375	3.58649	4.16336	4.16336	CHROMOSOME_IV	6601688	6602428	+	WBGene00018164		cds
C06G1.4	4	0	0	0.406354	0.514232	1.31093	3.1	3.25845	3.47764	3.26224	3.64727	3.64727	CHROMOSOME_X	16613376	16616790	+	WBGene00015547	ain-1	cds
ZK829.9	4	0	0	0	0.5356	1.55454	4.05193	4.39232	4.71853	4.32949	4.61479	4.71853	CHROMOSOME_IV	11970511	11973460	+	WBGene00014097		cds
Y75D11A.3	4	0	0	0	0.370268	1.5208	2.86757	3.25845	3.76543	3.45639	3.75522	3.76543	CHROMOSOME_X	1745240	1746212	-	WBGene00022292		cds
C25A11.2	4	0	0	0	0	1.42746	3.46413	4.10312	4.20078	3.46865	4.03709	4.20078	CHROMOSOME_X	9114310	9116836	+	WBGene00016087		cds
Y71H10A.1	4	0	0	0	0	1.15921	2.69041	3.32837	3.34306	2.94482	3.34064	3.34306	CHROMOSOME_X	2940860	2945479	+	WBGene00022199		cds
T04C10.1	4	0	0	0	0	0.768972	2.00989	2.64155	2.83331	2.40669	2.70939	2.83331	CHROMOSOME_X	14819844	14824471	-	WBGene00003149	mbk-1	cds
C53B7.4	4	0	0	0.290991	0	0.801587	2.35653	3.39416	3.19461	3.3931	3.6212	3.6212	CHROMOSOME_X	6841216	6842164	+	WBGene00000210	asg-2	cds
F53C11.7	4	0	0	0.406354	0.183506	1.24742	2.78321	3.25894	3.46643	3.25439	3.53962	3.53962	CHROMOSOME_V	13800977	13804269	-	WBGene00009976	swan-2	cds
K11E4.5	4	0	0	0	0	0.883516	2.2209	2.74743	2.65703	2.74535	3.08474	3.08474	CHROMOSOME_X	13747247	13751709	+	WBGene00003661	nhr-71	cds
R11G1.4	4	0	0	0.217437	0.183506	1.14039	2.74533	3.45879	3.26099	3.39881	3.76331	3.76331	CHROMOSOME_X	3646299	3650139	-	WBGene00004727	sax-1	cds
C45E5.6	4	0	0.283709	0	0.370268	1.06525	2.67502	3.10701	2.99038	2.937	2.85004	3.10701	CHROMOSOME_IV	5747371	5757851	-	WBGene00003636	nhr-46	cds
F19B10.1	4	0	0.52069	0.217437	0.183506	1.31093	3.40423	4.35838	4.03217	3.89036	3.89904	4.35838	CHROMOSOME_II	3683180	3684612	+	WBGene00017583		cds
W04G3.5	4	0.748353	1.13307	0.406354	0.978778	1.83736	4.15636	4.60367	4.58226	4.33173	4.68809	4.28174	CHROMOSOME_X	11073592	11075977	+	WBGene00012258		cds
F35A5.8	4	0	0.72418	0.290991	0.346283	1.22664	3.76594	3.84141	4.17685	3.63597	4.205	4.205	CHROMOSOME_X	3800025	3802751	-	WBGene00001335	erp-1	cds
W05H9.4	4	0	0.463942	0.47108	0.39386	1.65816	4.30239	4.45575	4.75818	4.35633	4.60582	4.75818	CHROMOSOME_X	6263610	6266879	+	WBGene00021051		cds
F35C8.7	4	0	0.463942	0	0.183506	1.71894	3.87043	4.02047	4.13138	3.68614	4.1202	4.13138	CHROMOSOME_X	5355602	5364290	-	WBGene00018037	chtl-1	cds
C17E4.20	4	0	0.283709	0.217437	0	0.768972	2.82637	2.84477	3.10336	3.02682	3.38279	3.38279	CHROMOSOME_I	9414449	9416695	+	WBGene00219313		cds
ZK783.4	4	0	0.283709	0.47108	0	0.883516	3.03202	2.74673	3.36736	2.94091	3.39325	3.39325	CHROMOSOME_III	7650487	7655967	-	WBGene00001470	flt-1	cds
C35C5.3	4	0.748353	0.463942	0.775244	0.514232	1.41457	3.72504	3.51983	3.87983	4.02631	4.00395	3.56237	CHROMOSOME_X	11545050	11546431	-	WBGene00007955		cds
T04D3.5	4	0	0	0.217437	0	1.18416	3.40326	2.93839	3.69506	3.46049	3.71408	3.71408	CHROMOSOME_I	13329164	13330940	-	WBGene00011434		cds
C17E7.4	4	0	0	0	0	1.44821	3.53537	3.45964	3.66596	3.63113	3.9694	3.9694	CHROMOSOME_V	3892841	3894561	+	WBGene00015899		cds
C36C9.1	4	0	0	0	0	1.08847	3.26189	3.39461	3.54854	3.3299	3.87784	3.87784	CHROMOSOME_X	1682947	1686378	+	WBGene00016485		cds
C17G1.4	4	0	0	0	0	1.15921	3.21366	3.3293	3.34306	3.69428	3.6725	3.69428	CHROMOSOME_X	9925865	9931402	-	WBGene00007651	nra-3	cds
F20B6.2	4	0.645513	0.72418	0.858642	0.370268	2.37584	5.119	5.32336	5.38457	5.69851	5.95973	5.58946	CHROMOSOME_X	4191068	4193111	+	WBGene00006921	vha-12	cds
T08G2.3	4	0	0	0.217437	0	1.24742	3.13978	3.10701	3.10336	3.40023	3.52108	3.52108	CHROMOSOME_X	17213067	17214855	-	WBGene00020366	acdh-10	cds
Y55B1BR.2	4	0	0.283709	0.406354	0	1.18097	2.85396	2.93839	3.22153	3.32541	3.21915	3.32541	CHROMOSOME_III	434910	440143	+	WBGene00021912		cds
K11G12.5	4	0	0.283709	0	0.183506	0.829417	2.24304	2.26543	2.30054	2.39817	2.51401	2.51401	CHROMOSOME_X	6723440	6725631	-	WBGene00019656		cds
Y37D8A.4	4	0	0.463942	0	0	1.13711	3.32292	3.6358	3.44375	3.83644	3.64649	3.83644	CHROMOSOME_III	12837085	12838852	-	WBGene00012546		cds
C41H7.3	4	0	0	0	0.346283	1.42746	3.54898	3.32837	3.67573	3.74137	3.7224	3.74137	CHROMOSOME_II	3005849	3007510	+	WBGene00016573		cds
F27D9.5	4	1.23863	0.72418	1.21481	1.27521	2.98272	5.57214	5.53056	5.4867	5.74259	5.68319	5.01841	CHROMOSOME_X	7657467	7660937	-	WBGene00017864	pcca-1	cds
C01B7.6	4	0	0	0	0	0.47351	1.30901	1.53965	1.35238	1.54385	1.97099	1.97099	CHROMOSOME_V	8805394	8819933	-	WBGene00004457	rpm-1	cds
C37E2.1	4	0	0	0.406354	0.346283	0.964751	2.22201	2.84412	2.5226	2.74982	3.41395	3.41395	CHROMOSOME_X	14170793	14173994	-	WBGene00007993	idhb-1	cds
C14A11.3	4	0	0	0.217437	0.210329	0.47351	2.27508	2.74534	2.22274	2.26622	3.1224	3.1224	CHROMOSOME_X	2785593	2799235	+	WBGene00006496	cgef-1	cds
K09A9.5	4	0	0.283709	0.217437	0.183506	0.768972	2.25344	2.93839	2.50079	2.40951	3.43391	3.43391	CHROMOSOME_X	15586745	15590329	-	WBGene00001520	gas-1	cds
C45H4.14	4	0	0	0.217437	0	0.612866	2.96201	3.51983	2.73382	2.63784	3.43346	3.51983	CHROMOSOME_V	2158673	2159417	-	WBGene00016695		cds
H28G03.2	4	0	0	0.217437	0	0.508361	2.61814	3.45922	2.81575	2.40385	3.36163	3.45922	CHROMOSOME_X	5205740	5216202	+	WBGene00019250		cds
F56B6.2	4	0	0	0	0	0.644543	2.23256	3.02574	2.47865	2.26622	2.86515	3.02574	CHROMOSOME_X	3542545	3557581	+	WBGene00004350	rgs-7	cds
F48D6.1	4	0	0	0.406354	0	0.644543	2.15355	2.84607	2.45616	2.40669	2.89491	2.89491	CHROMOSOME_X	4255130	4256788	+	WBGene00006393		cds
T09B9.1	4	0	0	0.290991	0	1.2679	3.49212	3.79142	3.59044	3.10266	4.27895	4.27895	CHROMOSOME_X	9757213	9759251	+	WBGene00011642		cds
K11D12.5	4	0	0	0	0.210329	0.357971	2.82564	3.18292	2.81575	2.85165	3.44401	3.44401	CHROMOSOME_V	5029309	5030796	-	WBGene00019645	swt-7	cds
T22G5.5	4	0	0	0.217437	0.183506	0.357971	2.36615	2.40229	2.22274	1.95172	2.86515	2.86515	CHROMOSOME_V	13893352	13896403	+	WBGene00011932	sptl-3	cds
C17H11.6	4	0	0	0	0	0.437796	1.6553	1.94649	2.27507	1.95172	2.33408	2.33408	CHROMOSOME_X	8185144	8203734	-	WBGene00015926		cds
F15A4.10	4	0	0	0	0	0.580478	2.60281	2.52484	3.11776	2.74982	3.45359	3.45359	CHROMOSOME_II	12484476	12485096	-	WBGene00008844		cds
ZK1086.1	4	0	0	0	0	0.357971	1.95864	2.11422	2.47865	2.52689	2.93779	2.93779	CHROMOSOME_X	13798247	13809789	-	WBGene00014215	obr-3	cds
E01F3.1	4	0	0	0	0.183506	0.319239	2.1424	1.94892	2.24914	1.95172	2.74177	2.74177	CHROMOSOME_II	14919629	14953236	+	WBGene00008443	pde-3	cds
F28C10.3	4	0	0	0	0	0.644543	2.52409	2.52647	2.67661	2.27245	3.26392	3.26392	CHROMOSOME_X	531873	535835	-	WBGene00017898		cds
ZC13.1	4	0	0	0.217437	0.210329	0.612866	2.36615	2.2664	2.47865	2.11753	3.14734	3.14734	CHROMOSOME_X	877271	879811	+	WBGene00022502		cds
H13N06.4	4	0	0	0	0.183506	0.612866	2.04748	2.11422	2.35017	2.26934	3.20734	3.20734	CHROMOSOME_X	15497487	15500215	+	WBGene00010397	suox-1	cds
C25F6.2	4	0	0.463942	0.573373	0	0.357971	2.13117	2.52647	2.22274	2.12443	2.35564	2.52647	CHROMOSOME_X	5479666	5484904	+	WBGene00001006	dlg-1	cds
R07E4.3	4	0	0.814436	0.47108	0.210329	0.644543	2.34584	3.02459	2.50079	2.26622	3.00694	3.02459	CHROMOSOME_X	5953415	5953748	+	WBGene00019937		cds
F08G12.10	4	0	0.902484	0.858642	0.183506	0.85672	3.53671	3.45964	3.40307	3.78915	4.04375	4.04375	CHROMOSOME_X	11294898	11296667	-	WBGene00002124	inx-2	cds
T04C10.2	4	0	0.463942	0.573373	0.183506	1.40914	3.68558	3.32884	3.44375	3.74025	3.81766	3.81766	CHROMOSOME_X	14815915	14818438	-	WBGene00001329	epn-1	cds
T18D3.1	4	0	0.52069	0.573373	0	0.883516	3.082	2.84542	2.85066	3.10789	3.19543	3.19543	CHROMOSOME_X	12454677	12457903	+	WBGene00011820		cds
R160.1	4	0	0.982532	0.533026	0	1.04166	3.1922	2.74604	2.99038	3.02313	3.67288	3.67288	CHROMOSOME_X	4389340	4393770	+	WBGene00001082	dpy-23	cds
T04C9.4	4	0	0.463942	0.406354	0	0.68006	1.50127	1.75805	1.75407	1.94784	1.97099	1.97099	CHROMOSOME_III	5971481	5973615	-	WBGene00003375	mlp-1	cds
T08D10.2	4	0	0.814436	0.47108	0	0.768972	2.65162	3.3955	3.71896	3.40165	3.56719	3.71896	CHROMOSOME_X	11948784	11951872	+	WBGene00011615	lsd-1	cds
T05A12.4	4	0	0.72418	0.858642	0.625329	1.20869	2.6508	2.74743	2.63717	2.75205	2.88011	2.88011	CHROMOSOME_IV	6887937	6897766	+	WBGene00020235		cds
T07D3.7	4	0	0.902484	0.631163	0.556656	1.24742	2.85468	3.578	3.39127	3.10615	3.49261	3.578	CHROMOSOME_II	873183	878961	+	WBGene00000106	alg-2	cds
C18B2.4	4	0	0	0	0	0	2.43459	2.52565	2.27507	2.40669	2.33408	2.52565	CHROMOSOME_X	3604335	3605737	-	WBGene00015955		cds
F21G4.4	4	0	0	0	0	0.19006	1.97129	1.9477	1.71672	1.94394	1.6977	1.97129	CHROMOSOME_X	9897255	9899418	-	WBGene00009025	phf-34	cds
ZK563.5	4	0	0	0	0	0.19006	2.28525	1.9477	2.03796	1.94394	1.914	2.28525	CHROMOSOME_X	3376835	3379220	-	WBGene00022769		cds
C46E10.4	4	0	0	0.217437	0	0.612866	3.13475	3.52146	3.2348	3.32691	3.09759	3.52146	CHROMOSOME_II	3717141	3719770	+	WBGene00016710	fbxc-52	cds
F47B7.2	4	0	0	0	0	0.357971	2.1424	2.2664	2.24914	2.26934	1.914	2.26934	CHROMOSOME_X	3772747	3778065	+	WBGene00018533		cds
F46C3.1	4	0	0	0	0	0.801587	3.27832	3.32837	3.26099	3.46729	3.1591	3.46729	CHROMOSOME_X	11410117	11414747	-	WBGene00003970	pek-1	cds
F54B11.3	4	0	0.283709	0.406354	0	0.883516	4.20411	4.14194	3.72837	3.98398	3.62968	4.20411	CHROMOSOME_X	13584705	13589757	+	WBGene00006816	unc-84	cds
K10B3.10	4	0.748353	0.283709	0.573373	0.346283	1.11467	3.8135	3.84141	3.4998	3.63597	3.23034	3.5577	CHROMOSOME_X	3117445	3127063	-	WBGene00004951	spc-1	cds
C27C12.1	4	0	0	0.406354	0	0.768972	2.5598	2.64155	2.27507	2.64506	2.4379	2.64506	CHROMOSOME_X	14852498	14853685	-	WBGene00007771		cds
F46H6.2	4	0	0	0.217437	0	0.739939	2.44274	2.2664	2.30054	2.63543	2.07632	2.63543	CHROMOSOME_X	4494888	4504581	-	WBGene00000959	dgk-2	cds
R160.7	4	0	0	0.217437	0	0.71031	3.03931	2.4014	2.27507	3.11484	2.58874	3.11484	CHROMOSOME_X	4378005	4383341	-	WBGene00003084	lst-2	cds
ZK678.1	4	0	0	0.217437	0.39386	0.883516	2.52409	2.4014	1.97608	2.63301	1.99744	2.63301	CHROMOSOME_X	15731900	15735318	+	WBGene00023498	lin-15A	cds
F11A5.9	4	0	0	0	0.183506	0.547346	1.86397	1.75528	2.30054	2.11059	1.94278	2.30054	CHROMOSOME_V	16214870	16217684	+	WBGene00008677		cds
ZK154.7	4	0	0	0	0.183506	0.357971	2.4437	2.11313	2.5226	2.63784	2.24549	2.63784	CHROMOSOME_X	7794993	7798236	-	WBGene00000075	adm-4	cds
F25E5.1	4	0	0.52069	0.290991	0.210329	1.01766	2.73794	2.40052	2.67661	2.94677	2.45708	2.94677	CHROMOSOME_V	7465870	7471190	+	WBGene00017782		cds
H13N06.5	4	0	0.52069	0	0.346283	1.22664	3.25673	2.6393	3.20813	3.2638	2.96547	3.2638	CHROMOSOME_X	15505966	15507812	-	WBGene00006494		cds
C02E11.1	4	1.0899	1.0962	0.906233	0.664651	2.58648	5.164	5.32395	5.20385	4.91332	4.3912	4.6593	CHROMOSOME_V	1042693	1048583	-	WBGene00015344	nra-4	cds
ZK1236.3	4	0	0	0	0	0.739939	2.52409	3.10755	3.14614	2.52689	2.2222	3.14614	CHROMOSOME_III	8416155	8422578	+	WBGene00023405	sor-1	cds
C05D9.1	4	0	0.463942	0.406354	0	0.85672	3.09422	3.39505	3.24795	2.74086	3.11033	3.39505	CHROMOSOME_X	1128981	1132922	+	WBGene00004927	snx-1	cds
C49F5.3	4	0	0	0	0	0.768972	3.22427	3.25845	3.19461	2.64745	2.97943	3.25845	CHROMOSOME_X	11982723	11983831	-	WBGene00008207		cds
C47E8.7	4	0.748353	0.675026	0.723047	0.210329	0.989631	3.17532	3.57879	3.34306	2.93896	3.50231	3.36846	CHROMOSOME_V	14691837	14696918	-	WBGene00006836	unc-112	cds
C14A11.9	4	0	0	0	0	1.01766	3.4172	3.97789	3.46643	3.17969	3.26392	3.97789	CHROMOSOME_X	2807908	2809623	-	WBGene00050944		cds
K11G12.6	4	0	0	0	0.183506	0.612866	2.54206	3.02516	2.50079	2.27245	2.55269	3.02516	CHROMOSOME_X	6725742	6729618	-	WBGene00019657		cds
K01A6.2	4	0	0.283709	0	0	0.644543	2.66726	3.25748	2.5226	2.40101	2.51486	3.25748	CHROMOSOME_IV	11715067	11729258	+	WBGene00010444	magi-1	cds
C54H2.5	4	0	0.463942	0.406354	0.370268	1.78147	4.09804	4.78985	4.08816	3.88934	4.24521	4.78985	CHROMOSOME_X	5778830	5780711	-	WBGene00004788	sft-4	cds
F59F4.4	4	0	0	0	0.183506	1.2679	3.20832	4.29018	3.61612	3.52226	3.25298	4.29018	CHROMOSOME_X	15849831	15851702	+	WBGene00010339	acl-1	cds
C34F6.8	4	0	0	0.406354	0.210329	0.913667	2.25344	2.74673	2.06793	2.11406	2.05011	2.74673	CHROMOSOME_X	11215631	11218088	+	WBGene00007942	idh-2	cds
C03B1.12	4	1.60389	1.02238	1.93589	1.76177	3.5111	5.9711	5.837	6.10314	5.6842	5.6829	5.08076	CHROMOSOME_X	6376422	6377651	-	WBGene00003053	lmp-1	cds
F20G2.2	4	0	0	0.573373	0.664651	1.58991	3.65763	3.57879	3.80609	3.40165	3.54943	3.80609	CHROMOSOME_V	13754998	13756398	-	WBGene00008986		cds
F38H12.3	4	0	0	0	0	1.18097	2.56729	2.40052	2.67661	2.11406	2.55186	2.67661	CHROMOSOME_V	4095040	4100526	+	WBGene00018189	nhr-181	cds
T25G12.5	4	0	0	0.406354	0.183506	1.90624	4.06798	3.93372	4.01297	3.32691	3.89233	4.06798	CHROMOSOME_X	17214944	17217033	-	WBGene00020812	acdh-7	cds
W09C2.3	4	0	0	0.573373	0	2.03486	3.56993	3.3279	3.87983	3.19288	3.43346	3.87983	CHROMOSOME_IV	9625893	9634931	-	WBGene00003151	mca-1	cds
R13F6.4	4	0	0	0	0.346283	1.22664	2.89053	3.45879	3.2348	2.52689	2.83545	3.45879	CHROMOSOME_III	6820880	6847219	+	WBGene00006498	ten-1	cds
ZK637.11	4	0	0	0	0.370268	2.08531	4.32228	4.63254	4.98347	4.21304	4.24495	4.98347	CHROMOSOME_III	8916339	8917853	-	WBGene00000388		cds
R13A5.7	4	0	0	0.217437	0	1.06525	3.50087	3.25894	3.74702	2.51643	3.43346	3.74702	CHROMOSOME_III	7567400	7570066	-	WBGene00020050		cds
T26C11.7	4	0	0	0	0	0.768972	2.99532	2.52565	3.16012	2.11406	2.41663	3.16012	CHROMOSOME_X	1854142	1856166	-	WBGene00000460	ceh-39	cds
T28F2.2	4	0	0	0.573373	0.210329	1.48367	3.38396	3.3279	3.45514	2.40385	2.70864	3.45514	CHROMOSOME_I	3637438	3638822	+	WBGene00020901		cds
W02B8.2	4	0	0.72418	0.217437	0.370268	0.85672	2.76075	2.84542	3.14614	2.52689	2.58874	3.14614	CHROMOSOME_II	13908851	13915179	+	WBGene00012198		cds
Y53G8AM.8	4	0	0.814436	0	0.210329	1.06525	2.2943	2.64005	2.715	1.94004	2.28996	2.715	CHROMOSOME_III	3267169	3278689	-	WBGene00021808		cds
C05D9.7	4	0	0	0.217437	0	0	2.23256	1.53642	1.67837	1.53869	1.73108	2.23256	CHROMOSOME_X	1117194	1119404	-	WBGene00015474		cds
Y38F1A.5	4	0	0	0.47108	0	0.19006	2.58472	2.52565	2.06793	2.12098	2.69254	2.69254	CHROMOSOME_II	12980522	12993049	+	WBGene00000870	cyd-1	cds
ZC204.2	4	0	0	0.406354	0	0.357971	3.3397	2.84542	2.81575	2.52949	3.05927	3.3397	CHROMOSOME_II	1663803	1665771	+	WBGene00022554	duxl-1	cds
ZK1053.4	4	0	0	0.217437	0	0	1.46594	1.53804	1.35238	1.27726	1.36215	1.53804	CHROMOSOME_I	13241653	13244719	+	WBGene00014199		cds
C18B12.4	4	0	0.283709	0	0.664651	0.768972	3.02724	3.3279	2.97465	2.74535	3.13492	3.3279	CHROMOSOME_X	15036627	15040532	-	WBGene00007666		cds
F48F7.1	4	0	0.283709	0.217437	0.210329	0.644543	2.33608	2.52484	2.00735	1.94394	2.58874	2.58874	CHROMOSOME_X	13949073	13956187	+	WBGene00000105	alg-1	cds
F59D12.5	4	0	0.463942	0	0	0.47351	2.82637	2.84477	2.32557	2.2631	2.78937	2.84477	CHROMOSOME_X	15646311	15647289	-	WBGene00010332		cds
F08F1.7	4	0	0.814436	0	0	0.319239	2.58472	2.39963	2.0973	2.12098	2.51486	2.58472	CHROMOSOME_X	8418593	8422002	-	WBGene00006472	tag-123	cds
W01C8.4	4	0	0.463942	0	0	0.357971	2.87573	2.2664	2.50079	2.25997	2.60604	2.87573	CHROMOSOME_X	5680314	5684706	-	WBGene00020920	set-20	cds
Y5H2B.2	4	0	0.283709	0	0	0.508361	2.42349	2.1153	2.06793	1.7555	2.10206	2.42349	CHROMOSOME_V	2192496	2196825	+	WBGene00003612	nhr-13	cds
F48E3.3	4	0.748353	0.52069	0.217437	0.800858	0.47351	3.88827	4.06211	4.06605	3.1896	3.63811	3.84861	CHROMOSOME_X	7495640	7500939	-	WBGene00018604	uggt-1	cds
R13G10.2	4	0	0	0.217437	0	0	3.27376	3.39505	3.2348	2.11753	3.11033	3.39505	CHROMOSOME_III	3822385	3826243	+	WBGene00000137	amx-1	cds
K09E9.2	4	0.645513	0.283709	0	0.183506	0.47351	2.83404	2.84542	2.43332	2.12098	2.39689	2.84542	CHROMOSOME_X	15613737	15616453	-	WBGene00010725	erv-46	cds
W06D11.1	4	0.748353	0.902484	0.406354	0.346283	0.508361	3.1802	3.63656	3.13202	2.937	3.433	3.29027	CHROMOSOME_X	12293699	12295479	+	WBGene00012299		cds
B0285.9	4	0	0	0	0	0.357971	2.25452	1.94528	1.35238	1.75105	2.33408	2.33408	CHROMOSOME_III	4367804	4370132	+	WBGene00000512	ckb-2	cds
C06E2.5	4	0	0	0	0	0.19006	2.11985	1.9477	1.35238	1.74658	2.37594	2.37594	CHROMOSOME_X	8856998	8857901	-	WBGene00015529		cds
F14F3.3	4	0	0	0	0	0.19006	2.39559	2.26543	1.67837	2.11406	2.80513	2.80513	CHROMOSOME_X	10521738	10524503	-	WBGene00008806	mboa-7	cds
C05D9.5	4	0	0	0	0	0.19006	2.02338	2.1153	1.30282	1.76436	2.22325	2.22325	CHROMOSOME_X	1104209	1106244	+	WBGene00002062	ife-4	cds
C50E10.4	4	0	0	0	0	0.508361	2.24304	2.6393	1.40028	2.11753	2.39689	2.6393	CHROMOSOME_II	12339880	12344729	+	WBGene00004945	sop-2	cds
F14H3.3	4	0	0	0	0	0.644543	2.50681	2.6408	1.71672	2.51905	2.74177	2.74177	CHROMOSOME_V	16051901	16053433	-	WBGene00008822		cds
F07C3.4	4	0	0.463942	0	0.492542	0.508361	2.44274	2.52647	1.67837	2.64025	2.83614	2.83614	CHROMOSOME_V	9234601	9243141	-	WBGene00017195	glo-4	cds
B0410.2	4	0	0	0.217437	0	0.357971	1.74801	2.26543	1.67837	2.11753	2.39689	2.39689	CHROMOSOME_X	2885859	2890593	+	WBGene00015171	vang-1	cds
F35C8.4	4	0	0	0.217437	0.183506	0.47351	1.99757	2.52728	1.71672	2.2631	2.78937	2.78937	CHROMOSOME_X	5349064	5352361	+	WBGene00006371	syx-3	cds
ZK899.8	4	0	0	0	0	0.508361	2.16576	2.93962	1.71672	2.40669	2.92342	2.93962	CHROMOSOME_X	9472410	9516378	+	WBGene00001516	gap-2	cds
C27C12.4	4	0	0	0.217437	0	0.357971	1.6709	1.94649	1.30282	2.12443	2.35564	2.35564	CHROMOSOME_X	14854062	14856452	+	WBGene00007774		cds
W02A11.3	4	0	0	0.47108	0.39386	0.612866	2.97595	3.25748	2.03796	3.19124	3.54901	3.54901	CHROMOSOME_I	12738077	12741139	+	WBGene00012194	toe-4	cds
T19H5.4	4	0.645513	0.283709	0.217437	0	0.829417	2.82637	3.63316	2.67661	3.88224	4.19904	4.19904	CHROMOSOME_II	9486205	9488199	-	WBGene00011849		cds
F39C12.1	4	0.748353	0	0.406354	0.5356	0.883516	3.03931	2.93901	2.06793	2.85373	2.90891	3.03931	CHROMOSOME_X	4834840	4853035	-	WBGene00018193		cds
C17E7.12	4	0	0	0	0.346283	1.33341	3.06905	3.02574	2.22274	2.64265	2.85004	3.06905	CHROMOSOME_V	3890950	3892011	-	WBGene00015905		cds
F52D2.4	4	0	0	0	0	1.98442	4.04957	4.32504	3.26099	3.57772	4.58396	4.58396	CHROMOSOME_X	1986197	1989599	-	WBGene00001569	gei-12	cds
ZK637.13	4	0	0	0	0.370268	1.18416	3.16869	3.3279	2.85066	2.94677	3.52108	3.52108	CHROMOSOME_III	8922321	8923350	-	WBGene00014030	glb-1	cds
F26G5.1	4	0	0.463942	0.217437	0	1.98807	4.11465	4.28994	3.81495	4.25396	4.2733	4.28994	CHROMOSOME_V	4975471	4977485	+	WBGene00017843		cds
T03G11.6	4	0	0.283709	0	0	1.62209	3.50432	3.93341	3.07413	3.63838	3.83277	3.93341	CHROMOSOME_X	5177456	5179166	-	WBGene00020199		cds
F57C7.1	4	0	0.675026	0.406354	0	1.62209	3.66932	3.63505	2.95874	3.3299	3.38279	3.66932	CHROMOSOME_X	10569057	10575659	+	WBGene00010199	bet-2	cds
K08F8.6	4	0	0.814436	0.406354	0.370268	1.39058	3.76307	4.02076	3.37936	3.89036	3.53017	4.02076	CHROMOSOME_II	8770920	8781966	+	WBGene00002295	let-19	cds
C36C9.3	4	0	0	0.290991	0	0.989631	3.09301	3.3955	2.30054	3.51571	3.07235	3.51571	CHROMOSOME_X	1676200	1678102	-	WBGene00016486	fbxa-170	cds
F32B6.1	4	0	0	0	0	0.47351	2.05938	2.6393	1.75407	2.52167	2.17556	2.6393	CHROMOSOME_IV	9879308	9882122	+	WBGene00003603	nhr-4	cds
F32A6.4	4	0	0	0	0.210329	0.829417	2.39559	2.93839	1.75407	2.75205	2.70864	2.93839	CHROMOSOME_X	5289696	5298008	-	WBGene00000092	ags-3	cds
T14F9.1	4	0	0.283709	0	0.39386	0.993268	2.909	3.6892	2.65703	3.63476	3.63851	3.6892	CHROMOSOME_X	2237901	2240246	+	WBGene00020507	vha-15	cds
T20F7.1	4	0	0.283709	0.217437	0.370268	0.993268	2.00989	2.26543	1.71672	2.40669	2.24549	2.40669	CHROMOSOME_X	16872853	16878214	+	WBGene00020630		cds
F12E12.1	4	0	0	0	0.183506	1.33054	3.1802	3.18446	2.06793	3.32242	3.26341	3.32242	CHROMOSOME_II	3741885	3742507	+	WBGene00017402		cds
T27A3.1	4	0	0.283709	0	0.5356	1.04166	2.81163	2.74673	2.03796	2.74311	2.51486	2.81163	CHROMOSOME_I	6122592	6126856	+	WBGene00020838		cds
Y71H9A.3	4	0	0	0	0.346283	0.739939	3.16926	3.18446	2.45616	3.1863	3.14734	3.1863	CHROMOSOME_X	11644076	11647227	+	WBGene00006066	sto-4	cds
C03A3.2	4	0.645513	0	0	1.21867	0.85672	3.19106	4.10258	3.83252	3.84273	3.31935	4.10258	CHROMOSOME_X	11262781	11266247	+	WBGene00007267		cds
F25H2.2	4	0	0	0	0.514232	0.437796	2.13235	3.18446	2.69594	2.63543	2.39689	3.18446	CHROMOSOME_I	10543013	10546414	+	WBGene00009116		cds
F40E10.6	4	0	0	0	0.514232	0.644543	2.22201	2.4014	3.00595	2.26622	2.39689	3.00595	CHROMOSOME_X	14703645	14706789	-	WBGene00009574		cds
K03A1.2	4	0	0	0.217437	0.664651	0.319239	2.58559	3.3955	3.69995	2.74982	3.00633	3.69995	CHROMOSOME_X	7292091	7295991	+	WBGene00019351	lron-7	cds
F52B10.1	4	0	0.283709	0.573373	0.492542	0.68006	2.34685	3.02631	3.10336	2.52428	2.33408	3.10336	CHROMOSOME_X	2909546	2918027	+	WBGene00003776	nmy-1	cds
F54G8.3	4	0	0.72418	1.13716	1.08933	0.913667	3.58409	4.51753	4.31777	3.63959	3.80204	4.51753	CHROMOSOME_III	9167962	9172728	-	WBGene00002081	ina-1	cds
C11H1.2	4	0	0	0	0	0.19006	0.963258	1.53965	1.40028	0.957729	1.27633	1.53965	CHROMOSOME_X	14304864	14307697	-	WBGene00007528		cds
F19B10.9	4	0	0	0	0.183506	0.508361	1.93299	3.63467	2.95874	2.40669	2.64079	3.63467	CHROMOSOME_II	3671914	3673593	-	WBGene00004750	sea-1	cds
C33A11.2	4	0	0	0	0	0.85672	2.24194	3.74209	3.51075	2.94091	3.29723	3.74209	CHROMOSOME_X	15365925	15369931	+	WBGene00007878		cds
C25A1.11	4	0	0.283709	0	0	0.357971	2.09693	3.45964	2.65703	2.51905	2.74177	3.45964	CHROMOSOME_I	10193916	10196990	-	WBGene00000095	aha-1	cds
T08D10.1	4	0	0.463942	0	0	0.644543	1.95864	3.02574	2.65703	2.2631	2.57042	3.02574	CHROMOSOME_X	11944290	11946766	-	WBGene00011614	nfya-1	cds
T03E6.7	4	0	0.902484	0.573373	0.370268	0.993268	2.44274	4.48832	3.81929	3.47271	3.27528	4.48832	CHROMOSOME_V	16592550	16595327	-	WBGene00000776	cpl-1	cds
C11H1.3	4	0	0	0	0	0.47351	1.48372	2.26543	2.99038	1.76877	2.12623	2.99038	CHROMOSOME_X	14307793	14311613	-	WBGene00007529		cds
M05B5.4	4	0	0	0	0	0.437796	1.1126	1.75805	2.27507	1.28959	1.85602	2.27507	CHROMOSOME_I	7188493	7190560	+	WBGene00010872		cds
Y38F1A.2	4	0	0	0	0	0.508361	1.20346	1.75805	2.47865	1.28344	1.99744	2.47865	CHROMOSOME_II	12954893	12957950	+	WBGene00012606		cds
C25G4.10	4	0	0	0	0.210329	0.768972	1.60406	1.94649	2.27507	1.28959	1.85602	2.27507	CHROMOSOME_IV	12468647	12474866	+	WBGene00007736		cds
F13H10.3	4	2.20693	2.01381	2.09528	2.31896	2.56792	3.00701	3.3279	3.52712	2.94287	3.40364	1.51332	CHROMOSOME_IV	11012092	11015862	-	WBGene00008774		cds
C54H2.1	4	0	0	0	0.370268	0.508361	1.48372	2.26738	2.27507	1.53351	2.07632	2.27507	CHROMOSOME_X	5776216	5778845	+	WBGene00006368	sym-3	cds
C34F11.9	4	0	0	0.217437	0.210329	0.768972	2.47068	2.6423	3.55913	2.40385	3.18342	3.55913	CHROMOSOME_II	5214430	5225361	-	WBGene00001101	dsh-1	cds
F29C4.1	4	0	0.283709	0.217437	0	0.768972	2.70722	2.84477	3.46643	2.75427	3.08532	3.46643	CHROMOSOME_IV	132416	138076	+	WBGene00000897	daf-1	cds
Y25C1A.13	4	0	0	0.47108	0.210329	1.40914	3.51868	3.88719	4.66311	3.74473	3.94243	4.66311	CHROMOSOME_II	3109374	3111230	-	WBGene00021296		cds
T21D12.4	4	0	0	0.406354	0.514232	0.739939	2.24304	2.11422	2.67661	2.11406	2.5339	2.67661	CHROMOSOME_IV	261883	264234	-	WBGene00003932	pat-6	cds
E02H4.3	4	0	0	0.406354	0	0.508361	2.29535	2.64005	2.79798	1.7555	2.82072	2.82072	CHROMOSOME_X	14284798	14293923	-	WBGene00006517	tag-172	cds
F33H1.1	4	0	0	0	0	0.357971	1.99757	2.52647	2.61704	1.75994	2.57042	2.61704	CHROMOSOME_II	10157478	10169262	-	WBGene00000914	daf-19	cds
K02G10.8	4	0	0.675026	0.406354	0	1.2679	3.37922	3.74244	4.00525	2.8454	3.84043	4.00525	CHROMOSOME_X	4709838	4711715	-	WBGene00001032	dnj-14	cds
R10E4.1	4	1.0899	1.0962	0.858642	1.10371	1.06871	3.082	2.74534	3.37936	2.40101	3.22982	2.52072	CHROMOSOME_III	4269735	4272479	+	WBGene00011198		cds
T03G11.4	4	0	0	0	0	0.19006	1.74801	1.53804	2.06793	1.53869	1.79419	2.06793	CHROMOSOME_X	5165364	5168749	+	WBGene00020197		cds
Y34B4A.8	4	0	0	0	0	0	2.17673	2.2664	2.73382	1.76436	2.17556	2.73382	CHROMOSOME_X	5271811	5275250	-	WBGene00021324		cds
C15H9.5	4	0	0	0	0.210329	0.19006	1.13527	1.53965	1.40028	0.973102	1.66507	1.66507	CHROMOSOME_X	6093251	6097536	+	WBGene00015801		cds
ZK355.2	4	0	0	0.47108	0.5356	0.612866	2.50681	2.64155	2.54409	1.94394	2.85004	2.85004	CHROMOSOME_II	2923920	2926955	+	WBGene00022712		cds
F40F4.7	4	0	0	0.406354	0	0.612866	2.85396	2.52728	2.65703	1.95172	3.81766	3.81766	CHROMOSOME_X	3243875	3245968	-	WBGene00018238		cds
R07E4.4	4	0	0	0	0	0.19006	1.18184	1.28024	1.35238	0.957729	1.7637	1.7637	CHROMOSOME_X	5945786	5948834	-	WBGene00003254	mig-23	cds
B0272.3	4	1.23863	0	0.217437	0.183506	1.40914	3.59187	3.84076	3.72837	3.64199	4.35514	4.35514	CHROMOSOME_X	9431366	9432689	+	WBGene00007129		cds
T10B10.3	4	0.748353	0	0.217437	0.183506	1.18097	2.80384	3.25796	3.35526	3.02313	3.72277	3.72277	CHROMOSOME_X	15178026	15181397	-	WBGene00011680		cds
F13G11.1	4	1.16618	0.283709	0.775244	0	1.33054	3.84622	4.3255	4.7138	3.79888	4.50983	4.7138	CHROMOSOME_IV	14616575	14623936	+	WBGene00007058	dmd-6	cds
F41G4.2	4	0.645513	0	0.631163	0	1.37177	3.27215	4.10285	3.79717	3.89137	4.10175	4.10285	CHROMOSOME_X	16807385	16813600	-	WBGene00000294	cas-1	cds
ZK1236.2	4	1.84957	1.02238	1.61994	0.765123	2.28683	4.54588	5.01913	4.91083	4.90933	5.01297	4.25401	CHROMOSOME_III	8426266	8428508	+	WBGene00000414	cec-1	cds
F36D3.1	4	0.748353	0	0	0.183506	1.29106	2.86828	3.18446	3.59044	3.02498	3.09759	3.59044	CHROMOSOME_V	16499331	16502856	+	WBGene00009469		cds
Y69A2AR.7	4	1.0899	0.463942	0.217437	0.183506	1.46605	3.36969	3.74174	3.56964	3.39738	3.46356	3.55823	CHROMOSOME_IV	2601139	2607550	+	WBGene00022078		cds
F52D10.3	4	3.21109	1.06116	1.80769	2.02959	3.6808	5.96462	6.19637	6.1969	6.62626	6.60529	5.5651	CHROMOSOME_X	11603640	11605354	-	WBGene00001502	ftt-2	cds
F46F6.2	4	1.0899	0.283709	0.217437	0.183506	1.06525	3.14713	3.63543	3.90496	4.18255	3.5764	3.99904	CHROMOSOME_X	10397183	10402516	+	WBGene00009793	pkn-1	cds
F46H5.3	4	1.48978	0.52069	0.573373	1.08933	1.20869	4.11899	4.10312	4.28937	4.48866	4.84292	4.32223	CHROMOSOME_X	7230287	7238618	-	WBGene00018519		cds
T25G12.4	4	0.645513	0	0.217437	0.370268	0.739939	2.7817	3.02459	3.13202	3.25439	3.41349	3.41349	CHROMOSOME_X	17222401	17224503	+	WBGene00004270		cds
F53B1.2	4	0.748353	0.283709	0	0.183506	0.644543	3.14036	3.02344	3.00595	3.63959	3.56719	3.63959	CHROMOSOME_X	2108976	2111871	+	WBGene00018735		cds
T14F9.2	4	0.748353	0	0.217437	0	0.768972	1.83511	2.84607	2.24914	2.40101	2.86582	2.86582	CHROMOSOME_X	2234316	2236699	+	WBGene00020508		cds
C50F4.6	4	2.20693	1.71363	1.67593	1.40121	1.83938	3.7436	4.143	3.69995	3.58524	4.08248	2.74179	CHROMOSOME_V	9546068	9546814	+	WBGene00001910		cds
F13B9.8	4	1.23863	0	0	0	0.768972	3.14654	3.74139	3.24795	2.94287	3.56761	3.74139	CHROMOSOME_X	8283228	8285167	-	WBGene00001425	fis-2	cds
F57C7.3	4	1.54797	0.463942	0.631163	0.39386	0.739939	3.03329	3.32837	3.11776	2.85373	3.42374	3.02988	CHROMOSOME_X	10589718	10593274	-	WBGene00004749	sdn-1	cds
Y73B6BL.27	4	0.748353	0	0.217437	0	0.19006	2.13235	2.26543	2.0973	2.25997	2.1511	2.26543	CHROMOSOME_IV	6472145	6473224	-	WBGene00022248		cds
K09A9.2	4	1.0899	0	0	0.210329	0.357971	2.63498	3.39505	3.45514	2.93307	3.56719	3.56719	CHROMOSOME_X	15604697	15606567	-	WBGene00004276	rab-14	cds
K10C2.4	4	1.23863	0	0.217437	0.183506	0.508361	2.86898	3.10592	3.54854	2.94287	3.51151	3.54854	CHROMOSOME_X	6446612	6448962	-	WBGene00019620	fah-1	cds
R07E4.5	4	1.0899	0	0	0	0.357971	2.88983	3.02574	3.52712	2.27245	3.15965	3.52712	CHROMOSOME_X	5949489	5953139	-	WBGene00019938		cds
C02F12.4	4	0.748353	0	0	0	0.612866	2.11985	2.84477	2.50079	2.52428	2.37594	2.84477	CHROMOSOME_X	3674030	3678546	-	WBGene00006431	tag-52	cds
VF11C1L.1	4	0.645513	0.463942	0	0.370268	0.739939	2.82564	3.57879	3.14614	3.19124	3.05927	3.57879	CHROMOSOME_X	12968895	12975573	-	WBGene00004089	ppk-3	cds
C03G5.1	4	0.645513	0	0.217437	0.5356	0.989631	2.88983	3.84043	3.34306	2.94482	3.19543	3.84043	CHROMOSOME_X	8542814	8545974	-	WBGene00015391	sdha-1	cds
ZK1321.3	4	0.748353	0	0	0.183506	0.19006	2.36615	3.57839	2.43332	2.40101	2.74177	3.57839	CHROMOSOME_II	9768392	9769793	-	WBGene00000178	aqp-10	cds
Y47D3B.10	4	0.645513	0	0	0	0	1.52042	2.84607	2.50079	2.26934	2.2222	2.84607	CHROMOSOME_III	11372781	11377880	-	WBGene00001077	dpy-18	cds
B0563.4	4	0.748353	0.52069	0.290991	0.5356	0.146475	2.31638	2.1153	2.27507	2.2631	2.31219	2.16991	CHROMOSOME_X	9150635	9160597	+	WBGene00006479	tmbi-4	cds
K11D12.10	4	0.748353	0.283709	0.217437	0.346283	0.19006	2.27401	1.75805	2.45616	2.26934	2.37594	2.2661	CHROMOSOME_V	5056364	5064788	-	WBGene00003374	mlk-1	cds
C56E6.2	4	0.748353	0.675026	0.573373	0	0.580478	2.5514	2.93839	3.59044	2.8454	3.35094	3.59044	CHROMOSOME_II	6524888	6526305	+	WBGene00016970		cds
K09A9.4	4	0.645513	0.463942	0.217437	0	0.508361	2.03548	2.74673	2.85066	2.27555	2.77344	2.85066	CHROMOSOME_X	15591300	15595286	+	WBGene00010702	usp-33	cds
D1009.2	4	0.748353	0.52069	0.406354	0.210329	0.357971	3.14713	3.02401	3.94999	3.2638	3.81766	3.73966	CHROMOSOME_X	8911240	8914199	+	WBGene00000884	cyn-8	cds
F52D10.2	4	0.748353	0	0.217437	0	0.357971	2.84095	2.93717	3.55913	2.83912	3.20628	3.55913	CHROMOSOME_X	11589618	11591652	-	WBGene00009930		cds
R03E1.2	4	1.54797	0.52069	1.06876	0	1.13711	3.89458	4.48686	4.89838	4.45875	3.93497	4.89838	CHROMOSOME_X	14163029	14164439	-	WBGene00010993		cds
D1054.11	4	0.748353	0	0.290991	0.210329	0	2.48142	2.74464	4.27344	3.03965	3.32033	4.27344	CHROMOSOME_V	10793775	10794904	+	WBGene00008378		cds
M02E1.1	4	0.748353	0	0.217437	0	0.47351	1.86539	2.11313	3.02135	2.26622	2.10206	3.02135	CHROMOSOME_X	325962	334587	+	WBGene00019733		cds
F53H4.1	4	0.748353	0	0.573373	0	0.644543	2.61092	2.26543	3.2348	2.2631	2.6755	3.2348	CHROMOSOME_X	15861224	15865843	-	WBGene00000803	csb-1	cds
M01E5.4	4	4.18485	4.12049	4.0218	4.02131	3.87489	4.59501	4.83826	5.01843	4.81749	4.89071	1.14353	CHROMOSOME_I	13287540	13289535	-	WBGene00010807		cds
F09B9.3	4	0	0	0.996949	0.183506	0.508361	2.25344	2.26543	2.27507	2.12443	2.37594	2.37594	CHROMOSOME_X	10156799	10160379	-	WBGene00001331	erd-2	cds
F38A6.3	4	0	0.283709	0.996949	0	1.24742	2.9031	3.32837	2.97465	3.10615	3.50231	3.50231	CHROMOSOME_V	20780380	20785227	+	WBGene00001851	hif-1	cds
T14G8.1	4	0	0	0.723047	0	0.508361	1.92	2.2664	1.75407	2.27555	2.62392	2.62392	CHROMOSOME_X	12846360	12852531	-	WBGene00000482	chd-3	cds
F26E4.7	4	0	0	0.406354	0.183506	0.279439	0.937693	1.28024	0.793736	0.973102	1.40414	1.40414	CHROMOSOME_I	9774198	9779532	+	WBGene00009162		cds
T04D1.4	4	0.645513	0	1.17651	0.5356	1.31093	2.81163	3.57879	2.67661	2.74982	3.37272	3.57879	CHROMOSOME_I	4685869	4698576	-	WBGene00007053	chd-7	cds
F35B3.5	4	0.645513	0.52069	0.775244	0.210329	0	2.86221	3.25894	2.50079	3.02866	3.40364	3.40364	CHROMOSOME_X	17021739	17030146	-	WBGene00004121	pqn-34	cds
H12D21.7	4	0	0	0.631163	0	0	1.95864	2.2664	1.67837	2.11753	2.2222	2.2664	CHROMOSOME_V	14895632	14899004	+	WBGene00010383	mpst-3	cds
C18C4.10	4	0.645513	1.13307	0.775244	0	0.913667	2.00989	3.10647	2.85066	2.40951	2.93779	3.10647	CHROMOSOME_V	5575394	5581697	-	WBGene00002215	klc-2	cds
C24G6.4	4	0	0.283709	0	0.183506	0	0.767929	0.963749	0.863753	0.55692	1.08537	1.08537	CHROMOSOME_V	5505280	5509940	+	WBGene00003637	nhr-47	cds
F26D11.11	4	0	0.283709	0	0	0	1.71828	3.02574	2.30054	1.75994	3.11033	3.11033	CHROMOSOME_V	7972904	7977754	-	WBGene00002632	let-413	cds
Y62H9A.5	4	0	0.463942	0	0	0.19006	1.44794	2.11313	2.00735	1.76877	2.6933	2.6933	CHROMOSOME_X	11882047	11882849	-	WBGene00013393		cds
F44A6.2	4	0	0.283709	0.406354	0	0	2.49901	3.74209	3.47764	2.84749	3.77064	3.77064	CHROMOSOME_X	10201268	10205373	-	WBGene00004786	sex-1	cds
R09A8.3	4	0	0.283709	0.217437	0.183506	0	1.50127	1.75667	1.79048	1.28344	1.99744	1.99744	CHROMOSOME_X	12624588	12634286	-	WBGene00006493	tag-147	cds
K09A9.3	4	2.60698	3.16696	2.7069	2.74306	2.82374	3.82858	4.42394	4.83213	4.02262	4.58376	2.22515	CHROMOSOME_X	15600997	15603695	+	WBGene00010701	ent-2	cds
F14D12.2	4	1.54797	0.902484	0.686727	0.370268	1.118	2.57733	3.39416	3.24795	2.25683	3.38279	3.0239	CHROMOSOME_X	5593098	5594930	+	WBGene00006826	unc-97	cds
F54B11.5	4	0.748353	0.283709	0.217437	0	0.19006	2.34685	2.74743	2.30054	1.94784	3.51194	3.51194	CHROMOSOME_X	13594054	13595997	-	WBGene00010028		cds
B0034.3	4	0.748353	0	0.406354	0.645124	0.580478	1.40932	2.52728	3.11776	2.93896	2.77415	3.11776	CHROMOSOME_II	5945381	5956660	-	WBGene00000403	casy-1	cds
ZK1067.1	4	0	0	0	0.346283	0.47351	1.01563	1.75667	2.24914	2.27245	1.97099	2.27245	CHROMOSOME_II	9197458	9207148	+	WBGene00002299	let-23	cds
DY3.6	4	0	0	0.217437	0	0.146475	1.01563	1.53642	2.03796	1.75994	1.55921	2.03796	CHROMOSOME_I	8779731	8785409	-	WBGene00008439	mfb-1	cds
F52H2.2	4	0	0	0	0	0	0.911667	1.28024	1.97608	1.54385	1.55921	1.97608	CHROMOSOME_X	2554222	2557718	+	WBGene00000004	aat-3	cds
T27D12.4	4	0	0	0	0	0	1.08957	1.53804	2.06793	1.75994	1.7637	2.06793	CHROMOSOME_II	11827936	11829957	-	WBGene00003979	pes-5	cds
F22B7.10	4	0	0	0	0	0	1.13527	2.11638	2.47865	2.12443	1.73108	2.47865	CHROMOSOME_III	8659793	8667394	-	WBGene00001078	dpy-19	cds
Y57G11C.25	4	0	0	0.217437	0	0	0.990982	2.40229	2.69594	2.40669	1.96974	2.69594	CHROMOSOME_IV	14919592	14920391	+	WBGene00013319	ccch-5	cds
K09C4.10	4	0	0	0.217437	0	0	1.6553	3.10592	3.02135	3.0305	2.58874	3.10592	CHROMOSOME_X	3275997	3280187	-	WBGene00019554		cds
C10E2.6	4	1.0899	0	0.406354	0.909026	0.964751	2.64374	4.14221	4.76501	4.29222	3.53962	4.76501	CHROMOSOME_X	16767365	16770427	-	WBGene00015676		cds
ZK1320.11	4	0.645513	0	0.217437	0.183506	0.47351	1.50127	2.1153	2.30054	2.11059	1.59429	2.30054	CHROMOSOME_II	9667565	9668613	+	WBGene00014259		cds
C09E8.3	4	0	0	0	0	0.19006	0.578957	1.75667	1.71672	1.27726	1.7637	1.7637	CHROMOSOME_II	546704	552025	+	WBGene00015646	mlt-10	cds
Y57A10A.9	4	0	0	0	0	0.19006	0.708702	1.94528	1.79048	1.28344	1.82544	1.94528	CHROMOSOME_II	12248080	12249020	-	WBGene00013254	tag-276	cds
F27C1.4	4	0	0.283709	0.217437	0.210329	0.19006	1.46407	2.93839	2.99038	1.95172	2.83477	2.99038	CHROMOSOME_I	5422786	5423331	+	WBGene00017854		cds
C52D10.12	4	0	0.283709	0	0.39386	0	0.937693	2.52565	2.77999	2.11059	2.1996	2.77999	CHROMOSOME_IV	17197872	17206809	-	WBGene00016879		cds
F15A2.5	4	0	0	0	0	0	0.708702	3.02516	3.33075	2.94091	3.19543	3.33075	CHROMOSOME_X	13475842	13477388	-	WBGene00001164	efn-3	cds
K07C11.8	4	0	0	0	0	0	0.708702	1.9477	2.27507	1.94394	1.88596	2.27507	CHROMOSOME_V	8215543	8217749	-	WBGene00019480		cds
C18A11.7	4	0	0	0.217437	0	0.146475	0.611658	1.28024	1.30282	0.973102	1.08537	1.30282	CHROMOSOME_X	8050421	8058170	-	WBGene00001000	dim-1	cds
ZC373.2	4	0	0	0.217437	0	0	1.1599	2.39963	2.79798	1.95946	1.99866	2.79798	CHROMOSOME_X	10057867	10058379	-	WBGene00013867		cds
C35E7.1	4	0	0	0.217437	0	0	0.937693	2.84542	2.65703	1.94394	1.7637	2.84542	CHROMOSOME_I	10846767	10850094	+	WBGene00016453	vet-2	cds
C27H2.2	4	0	0	0.290991	0.183506	0	1.08957	2.39963	1.75407	2.12098	1.82544	2.39963	CHROMOSOME_IV	13952690	13963976	+	WBGene00007782		cds
F59F5.6	4	0	0	0.406354	0	0	0.855307	2.40229	2.0973	2.11753	1.88596	2.40229	CHROMOSOME_X	10549061	10555177	-	WBGene00006364	syd-2	cds
C01F6.5	4	0	0.283709	0.573373	0	0.19006	1.33087	2.2664	2.27507	2.84749	2.45708	2.84749	CHROMOSOME_IV	9108916	9109736	+	WBGene00000120	aly-1	cds
C32F10.6	4	0	0	0.217437	0	0.19006	1.52042	2.6408	2.5226	2.84122	2.60604	2.84122	CHROMOSOME_I	5818482	5821111	-	WBGene00003601	nhr-2	cds
R148.5	4	0	0	0.406354	0.183506	0.319239	1.58944	2.26543	2.0973	2.40669	2.31219	2.40669	CHROMOSOME_III	3166276	3171205	+	WBGene00020104		cds
C56G2.5	4	0	0	0	0	0.19006	1.40932	2.11422	2.32557	2.64025	2.39689	2.64025	CHROMOSOME_III	6320806	6324182	-	WBGene00016980		cds
F42G10.2	4	0	0	0	0	0.19006	0.937693	1.27832	1.35238	1.7555	1.48288	1.7555	CHROMOSOME_X	10027798	10030071	+	WBGene00003368	mkk-4	cds
F18C5.10	4	0	0	0.217437	0	0.19006	1.85033	2.40229	2.30054	3.32841	2.77344	3.32841	CHROMOSOME_II	6559227	6561428	-	WBGene00017563		cds
C05D2.1	4	0	0	0.217437	0	1.22664	2.46975	3.25894	3.11776	3.7924	3.27528	3.7924	CHROMOSOME_III	5624972	5632277	+	WBGene00000900	daf-4	cds
T14D7.1	4	0	0	0	0	0.883516	1.63787	2.84607	2.27507	3.03417	2.62392	3.03417	CHROMOSOME_II	8845538	8849094	+	WBGene00011767		cds
ZK1320.6	4	0	0	0	0	0.19006	0.708702	0.966147	0.793736	1.27726	0.924125	1.27726	CHROMOSOME_II	9674916	9677146	+	WBGene00000180	arc-1	cds
C30H6.6	4	0	0	0.217437	0	0.508361	1.4278	1.94649	2.00735	2.40951	1.55921	2.40951	CHROMOSOME_IV	17376388	17379280	+	WBGene00001811	haf-1	cds
W03D2.5	4	0	0.283709	0.47108	0.210329	0.68006	2.26484	3.02516	3.07413	3.58774	2.69254	3.58774	CHROMOSOME_IV	4050044	4051624	-	WBGene00006951	wrt-5	cds
F48F7.6	4	0	0	0	0.183506	0.437796	1.99757	2.74743	2.94265	2.94091	2.28996	2.94265	CHROMOSOME_X	13977758	13978960	+	WBGene00009851		cds
F45B8.1	4	0	0	0.631163	0	0.768972	2.9031	3.3279	3.65613	3.84795	3.27528	3.84795	CHROMOSOME_X	14964513	14965863	+	WBGene00004354	rgs-11	cds
R04A9.2	4	0	0	0.631163	0.183506	0.357971	2.72305	3.02574	3.33075	3.45776	2.7253	3.45776	CHROMOSOME_X	372234	376974	+	WBGene00019862	nrde-3	cds
ZC449.3	4	0	0	0.631163	0.210329	0.768972	3.15766	3.02574	3.68068	3.79348	2.97881	3.79348	CHROMOSOME_X	5017893	5021059	+	WBGene00022613		cds
K07D4.7	4	0	0	0.406354	0	0.319239	0.937693	1.28024	1.35238	1.52832	1.08537	1.52832	CHROMOSOME_II	4004892	4016080	+	WBGene00019487	tag-218	cds
Y37E11AR.1	4	0	0.52069	0.631163	0.346283	0.612866	1.53754	2.11638	1.75407	2.2631	1.85602	2.2631	CHROMOSOME_IV	3755775	3759932	+	WBGene00021368		cds
F26E4.12	4	0	0.463942	0.217437	0.39386	0	1.57293	2.11638	1.79048	2.53209	1.7637	2.53209	CHROMOSOME_I	9780340	9781407	+	WBGene00009165		cds
M117.1	4	0	0	0.217437	0	0	0.827736	0.963749	0.863753	1.28344	0.806592	1.28344	CHROMOSOME_IV	11814222	11819438	+	WBGene00010918		cds
C25A11.4	4	0	0	0.217437	0.556656	0.357971	1.52042	2.40052	1.75407	2.53468	2.51486	2.53468	CHROMOSOME_X	9098290	9113562	+	WBGene00000100	ajm-1	cds
C46C2.2	4	0.645513	0.52069	0.775244	1.32515	0.547346	2.47957	3.74209	3.47764	4.01985	3.54901	3.49916	CHROMOSOME_IV	9216936	9220381	+	WBGene00008110		cds
T12G3.2	4	0	0	0.825618	0.514232	0.146475	2.33711	3.25894	3.2348	3.03417	3.48284	3.48284	CHROMOSOME_IV	12038965	12046888	-	WBGene00011738		cds
Y47D7A.1	4	0	0	0.858642	0.514232	0	2.36715	3.10592	3.91324	4.02447	3.92811	4.02447	CHROMOSOME_V	4422392	4423051	+	WBGene00004813	skr-7	cds
C01B12.2	4	0.645513	0.675026	0.631163	0.183506	1.44821	3.62429	3.18446	3.10336	2.52428	2.86515	3.44078	CHROMOSOME_II	19538	22170	+	WBGene00015285	gmeb-1	cds
F13C5.2	4	0.748353	0.52069	0.631163	0	1.60609	3.39241	3.10864	3.02135	2.11406	2.60604	3.39241	CHROMOSOME_X	593953	596299	+	WBGene00017423		cds
H40L08.1	4	0.748353	0.72418	1.15008	0.39386	1.37177	3.64542	3.6358	2.95874	2.52428	3.20681	3.25156	CHROMOSOME_X	15080709	15084016	-	WBGene00010433		cds
C18B12.6	4	0	0.675026	0	0	0.739939	3.082	3.32884	2.32557	1.95172	2.51486	3.32884	CHROMOSOME_X	15003995	15007238	-	WBGene00007668		cds
ZK682.2	4	0	0.463942	0.217437	0	0.85672	2.43459	2.52565	2.03796	1.94394	1.99744	2.52565	CHROMOSOME_V	9263776	9266476	-	WBGene00022788		cds
K10D3.2	4	0	0.463942	0	0	0.644543	1.58772	1.53804	1.30282	0.973102	1.40414	1.58772	CHROMOSOME_I	7122604	7128422	-	WBGene00006753	unc-14	cds
C09E7.4	4	0.748353	0.72418	0	0.370268	0.989631	2.69884	2.84607	2.24914	2.11406	2.05129	2.84607	CHROMOSOME_III	6534414	6536942	-	WBGene00015638		cds
C14B9.6	4	0	0	0	0	1.08847	2.23146	1.94528	1.71672	0.965436	2.12735	2.23146	CHROMOSOME_III	8111100	8125409	-	WBGene00001565	gei-8	cds
C50E3.13	4	0	0	0	0.210329	1.71894	2.45086	2.40317	2.5226	1.54385	2.64158	2.64158	CHROMOSOME_V	7622316	7624195	-	WBGene00016824		cds
C50E3.11	4	0	0	0	0	2.74962	4.13032	3.97879	3.47764	2.94287	3.96271	4.13032	CHROMOSOME_V	7602233	7603475	-	WBGene00016822		cds
R04D3.4	4	0	0	0	0	1.82359	3.2131	2.93839	2.47865	2.11406	2.37594	3.2131	CHROMOSOME_X	13287691	13288748	-	WBGene00011012		cds
Y54F10BM.9	4	0	0.283709	0	0	0.989631	2.17559	1.53804	1.71672	1.27726	2.05129	2.17559	CHROMOSOME_III	2295333	2304909	-	WBGene00021863		cds
D1022.4	4	0	0	0	0	0.644543	2.09572	1.53965	1.35238	0.973102	1.52155	2.09572	CHROMOSOME_II	7456199	7457287	-	WBGene00017023		cds
W04D2.3	4	0	0	0.290991	0	0.989631	2.55052	1.75805	1.35238	0.965436	1.79419	2.55052	CHROMOSOME_V	12487247	12493243	+	WBGene00002133	inx-11	cds
F14H3.5	4	0	0	0	0	1.53777	3.10515	2.2664	1.75407	2.25997	2.77344	3.10515	CHROMOSOME_V	16055795	16057017	-	WBGene00008824		cds
F49H12.6	4	0	0	0.406354	0.210329	1.08847	2.87573	2.26446	1.71672	1.94784	2.1511	2.87573	CHROMOSOME_X	2066550	2070454	-	WBGene00018657	acl-4	cds
R09A8.2	4	0	0	0	0	0.768972	2.43363	1.75667	1.30282	1.53869	1.82544	2.43363	CHROMOSOME_X	12619404	12623488	+	WBGene00011153		cds
F19B10.10	4	0	0.675026	0	0	1.24742	3.12286	2.4014	1.40028	1.75994	2.45708	3.12286	CHROMOSOME_II	3677538	3681418	-	WBGene00017589		cds
C01G6.3	4	1.80254	0.982532	1.06876	1.8497	4.71845	5.40671	5.12101	5.62929	5.30318	5.10933	4.64676	CHROMOSOME_II	9269832	9271211	+	WBGene00007225		cds
ZK546.15	4	0	0	0	0.5356	3.15406	3.7579	3.39461	4.34862	3.84273	3.69767	4.34862	CHROMOSOME_II	4948148	4949480	-	WBGene00006619	try-1	cds
K02F6.7	4	0.645513	0	0	0.556656	2.48515	2.65864	2.84672	2.32557	2.64506	2.62392	2.84672	CHROMOSOME_II	2525225	2529249	-	WBGene00019341		cds
Y39B6A.10	4	1.23863	0.283709	0.406354	1.06947	4.16266	4.72544	4.73889	4.57705	5.04722	4.8944	4.76351	CHROMOSOME_V	19131502	19133545	-	WBGene00012672		cds
Y52B11A.8	4	0.748353	0.463942	0.217437	0.783101	4.18137	4.88009	4.88557	4.63581	5.19928	4.90175	4.98185	CHROMOSOME_I	11032334	11034046	+	WBGene00013127		cds
ZK1127.1	4	2.60698	2.24664	1.96596	2.5475	5.69877	6.50848	6.64424	6.40147	6.68809	6.3047	4.72213	CHROMOSOME_II	7065595	7067008	+	WBGene00003784	nos-2	cds
CC8.2	4	1.16618	0	0.631163	1.25777	2.91578	3.58193	3.88814	3.10336	3.63717	3.92811	3.92811	CHROMOSOME_IV	3645158	3648679	-	WBGene00016987		cds
F56D1.2	4	2.09889	1.58842	1.70313	2.0547	3.22988	3.6086	4.02134	3.63627	3.57898	3.76331	2.43292	CHROMOSOME_II	5475392	5478497	+	WBGene00018960		cds
C04A2.3	4	4.22894	4.26565	4.10254	4.4638	5.2626	5.29095	5.56032	5.38007	5.27145	5.5898	1.48726	CHROMOSOME_II	6835038	6847865	+	WBGene00001194	egl-27	cds
C25A1.9	4	2.93915	2.91894	2.76839	3.10688	3.68362	3.82437	3.6892	3.58008	3.73575	3.81662	1.05598	CHROMOSOME_I	10185790	10187540	+	WBGene00007710	rsa-1	cds
T12G3.6	4	0.748353	0.283709	0.217437	1.51024	3.72877	4.32475	3.93341	3.18768	3.97447	4.16254	4.10731	CHROMOSOME_IV	12030026	12031249	-	WBGene00011741		cds
H04M03.3	4	0	0	0	0.957329	3.27761	3.58279	3.93341	3.00595	3.46049	3.87003	3.93341	CHROMOSOME_IV	5891560	5893317	+	WBGene00019153		cds
F32D1.6	4	2.87508	2.5959	2.78121	3.04455	3.93933	4.26609	4.18078	3.90496	4.29069	4.56094	1.96504	CHROMOSOME_V	4373216	4374862	-	WBGene00017985		cds
T06D4.1	4	0	0	0	0.210329	3.32525	3.69665	3.18498	2.83331	2.93504	3.44311	3.69665	CHROMOSOME_II	3381839	3384023	+	WBGene00020290		cds
F02H6.4	4	0	0.283709	0	0.783101	2.86763	3.26649	3.45922	2.24914	3.51964	3.00633	3.51964	CHROMOSOME_IV	14216070	14219283	+	WBGene00008537		cds
K10H10.2	4	0	0.463942	0	0.556656	2.77741	3.16811	3.32837	2.50079	3.10963	2.80513	3.32837	CHROMOSOME_II	14492752	14494439	-	WBGene00010759	cysl-2	cds
EEED8.3	4	2.4966	2.08942	2.4357	4.07653	6.16589	6.45134	6.49189	6.67986	6.61201	6.34917	4.59044	CHROMOSOME_II	5414272	5415560	+	WBGene00017134		cds
F21G4.2	4	1.54797	0.859132	0.921377	2.71011	5.13328	5.55476	5.40609	5.2763	5.32255	5.74476	4.88563	CHROMOSOME_X	9884220	9889646	+	WBGene00003410	mrp-4	cds
ZK632.9	4	4.01446	3.62573	3.96113	4.57716	5.42152	5.56199	5.4385	5.76485	5.45343	5.683	2.13912	CHROMOSOME_III	9824786	9825358	-	WBGene00014016		cds
R06C7.4	4	3.46845	2.54309	2.20068	4.86939	6.65368	6.81931	7.02175	7.44672	7.40534	7.11608	5.24605	CHROMOSOME_I	7244935	7246293	+	WBGene00011063	cpg-3	cds
Y54G2A.36	4	2.55117	1.80619	1.2885	2.95833	4.93041	4.96137	4.60348	5.16964	5.41002	4.97199	4.12152	CHROMOSOME_IV	2897692	2901646	+	WBGene00021898		cds
C01G6.8	4	0	0	0	0.556656	2.2983	3.93525	3.88719	3.34306	3.45776	3.84806	3.93525	CHROMOSOME_II	9295877	9310242	-	WBGene00000289	cam-1	cds
C06H2.7	4	0	0	0	0.370268	2.56425	4.14465	4.18078	3.58008	3.51702	3.76259	4.18078	CHROMOSOME_V	11143041	11144732	-	WBGene00007391		cds
F53F8.3	4	0	0	0.217437	0.210329	2.24611	3.61625	3.63467	2.97465	3.17804	3.39279	3.63467	CHROMOSOME_V	20688589	20689498	-	WBGene00010000		cds
F14H3.6	4	0.748353	0.463942	0.74023	1.3615	4.22694	5.2199	5.65795	5.2306	5.32217	5.68726	5.22331	CHROMOSOME_V	16057302	16058872	-	WBGene00008825		cds
F43G6.7	4	0	0	0.290991	0.683918	2.41717	3.53066	3.68884	3.46643	3.45639	3.39325	3.68884	CHROMOSOME_II	11810725	11811611	+	WBGene00009659		cds
Y4C6A.3	4	0	0	0.217437	0.346283	2.58072	3.79114	4.02105	3.89663	4.05394	3.77028	4.05394	CHROMOSOME_IV	5450983	5452417	-	WBGene00021153		cds
F44E7.2	4	0	0.283709	0.290991	1.00965	2.59581	3.87043	4.18026	3.83252	4.14037	4.48091	4.48091	CHROMOSOME_V	5770438	5771750	+	WBGene00018424		cds
C03C10.3	4	4.52659	4.83869	4.70939	5.12387	6.25593	6.76904	7.18269	6.76129	6.96258	6.69172	2.6561	CHROMOSOME_III	4093280	4094899	-	WBGene00004392	rnr-2	cds
C07D8.6	4	1.0899	1.87151	1.13716	1.58762	4.41486	6.6177	6.65724	6.93669	7.0104	7.16378	6.07388	CHROMOSOME_X	7341463	7342737	+	WBGene00015565		cds
M151.7	4	0	0.463942	0.217437	0.556656	2.65921	4.49744	4.25446	4.35471	4.48799	4.51463	4.51463	CHROMOSOME_II	3622317	3624058	+	WBGene00019799		cds
F52E4.1	4	0.748353	1.26938	1.34743	1.67074	3.74796	5.76275	5.64487	5.97145	6.17032	5.97002	5.42196	CHROMOSOME_X	3089486	3092828	+	WBGene00018701	pccb-1	cds
C50E3.12	4	0	0	0	0	2.07544	2.94928	3.02516	3.14614	3.10441	3.1591	3.1591	CHROMOSOME_V	7620495	7622010	-	WBGene00016823		cds
F11G11.2	4	0.748353	0.859132	0.406354	1.05475	4.02906	5.81919	5.35595	6.00768	5.91144	6.0323	5.62594	CHROMOSOME_II	4882066	4883356	+	WBGene00001755	gst-7	cds
R04D3.3	4	0.645513	0.675026	0	0.370268	3.79627	5.87457	5.73781	6.14863	6.08388	5.57139	6.14863	CHROMOSOME_X	13288844	13290559	-	WBGene00011011		cds
C17E7.9	4	0	0	0	0	1.90624	3.61179	3.57879	3.24795	3.64199	3.68106	3.68106	CHROMOSOME_V	3889218	3890846	-	WBGene00015903		cds
F52D2.6	4	0	0.463942	0	0.183506	2.48872	4.22776	3.97849	3.62623	3.84482	4.23994	4.23994	CHROMOSOME_X	1974907	1980890	+	WBGene00018688		cds
F56A11.1	4	0	0	0	0.210329	1.62444	3.24004	2.84412	3.02135	3.02866	2.80513	3.24004	CHROMOSOME_IV	572723	583601	+	WBGene00001579	gex-2	cds
R09F10.8	4	0	0.283709	0	0.183506	2.78348	5.02567	4.68624	5.09148	4.99802	4.076	5.09148	CHROMOSOME_X	8325053	8326400	-	WBGene00019989		cds
W03G9.1	4	0	0.463942	0	0.183506	1.58991	3.09879	2.84412	3.33075	3.02498	2.65902	3.33075	CHROMOSOME_I	4980307	4983956	+	WBGene00004900	snf-1	cds
C49F5.6	4	0	0	0	0.183506	2.49742	4.32773	4.35861	4.59775	3.52617	3.71371	4.59775	CHROMOSOME_X	11988246	11991219	+	WBGene00008210		cds
F19H6.4	4	0	0.283709	0	0.370268	2.98272	4.54566	4.35816	4.43175	3.98208	4.26218	4.54566	CHROMOSOME_X	12365620	12367195	+	WBGene00008959		cds
F22E5.17	4	0.645513	0	0.217437	0.370268	2.7169	4.05521	3.8401	4.22093	4.21547	3.62081	4.22093	CHROMOSOME_II	2678064	2679167	+	WBGene00017712		cds
T05A7.1	4	0	0	0.217437	0.210329	1.83938	2.46975	2.52565	2.81575	2.94677	2.49557	2.94677	CHROMOSOME_II	4678023	4679635	+	WBGene00020219		cds
F25F2.2	4	0	0.463942	0	0.39386	1.851	2.74456	3.3955	3.37936	3.02498	2.97881	3.3955	CHROMOSOME_III	4520333	4536957	+	WBGene00000396	cdh-4	cds
F33D11.9	4	3.06168	3.46414	3.16473	3.13293	4.64779	4.93866	5.30567	5.19875	5.20051	5.10049	2.24399	CHROMOSOME_I	5857552	5862560	-	WBGene00018006	hpo-3	cds
C14F11.1	4	0	1.26938	0.982581	1.30039	3.79523	5.31401	5.45454	5.88137	5.88563	5.88485	5.88563	CHROMOSOME_X	6240919	6242690	+	WBGene00015778		cds
F13D12.2	4	0	0.859132	1.02631	1.05475	2.33902	3.73582	3.97819	3.90496	4.15224	4.15108	4.15224	CHROMOSOME_II	11725260	11726469	+	WBGene00002262	ldh-1	cds
ZK1005.1	4	0	1.0962	0.290991	0.210329	2.74639	4.16928	3.84076	3.98967	4.18172	4.70461	4.70461	CHROMOSOME_V	1276416	1285700	-	WBGene00004053	pme-5	cds
C04B4.2	4	0.645513	0	0.406354	0.664651	3.62221	5.01775	4.35884	4.72556	4.88399	5.32183	5.32183	CHROMOSOME_X	12283233	12285246	+	WBGene00007290		cds
W07E11.1	4	0.645513	0.283709	0.874292	0.683918	3.0048	4.61489	4.02105	4.31459	4.14547	4.7371	4.45339	CHROMOSOME_X	10084608	10104062	+	WBGene00012326		cds
C17F4.5	4	0.748353	0.675026	0.874292	0.70293	2.99072	3.99909	3.9328	3.98182	4.02539	4.69234	4.01731	CHROMOSOME_II	3246319	3248122	-	WBGene00015912	fbxc-50	cds
F02H6.2	4	0	0	0	0.210329	2.27825	2.90241	3.02459	3.10336	2.93504	3.5764	3.5764	CHROMOSOME_IV	14196424	14198799	+	WBGene00008535		cds
E02H4.6	4	0	0	0.290991	0.5356	2.51593	4.16407	3.39505	3.87136	4.325	4.26788	4.325	CHROMOSOME_X	14250441	14252067	-	WBGene00008464		cds
R08E5.2	4	0	0	0	0.39386	2.13405	3.64418	3.02401	3.66596	3.79673	3.63851	3.79673	CHROMOSOME_V	3774519	3776122	-	WBGene00019962	cysl-3	cds
F56A11.5	4	0	0	0.533026	0.39386	2.6966	3.85272	3.02459	3.80609	3.74361	3.84043	3.85272	CHROMOSOME_IV	568373	570843	-	WBGene00018925		cds
F43G6.10	4	0	0.283709	0.290991	0.346283	1.83938	3.24059	2.84607	2.85066	3.25596	3.56761	3.56761	CHROMOSOME_II	11809292	11810226	+	WBGene00009662		cds
Y6G8.3	4	0	0	0.217437	0.183506	1.65587	3.12227	2.26543	2.50079	3.02313	3.40364	3.40364	CHROMOSOME_V	17601797	17602926	+	WBGene00012405	ztf-25	cds
T05G11.1	4	0	0	0	0.370268	1.63792	3.37872	2.84542	2.88474	2.75205	3.48284	3.48284	CHROMOSOME_V	15926403	15928352	-	WBGene00011505	pzf-1	cds
T27A8.2	4	0	0	0	0	1.50108	2.53355	2.64005	2.27507	2.937	3.39325	3.39325	CHROMOSOME_X	16057652	16059047	-	WBGene00012074		cds
C11G6.1	4	0.645513	0.463942	0.406354	0.39386	1.57112	2.80532	2.52484	3.35526	2.94287	3.14734	2.9614	CHROMOSOME_X	16332368	16345951	+	WBGene00006384	taf-3	cds
T13H2.4	4	0	0	0	0	1.55454	3.47352	2.64005	3.95801	3.33437	3.30882	3.95801	CHROMOSOME_X	4610899	4620396	-	WBGene00004148	pqn-65	cds
C55B6.1	4	0	0	0	0	1.08847	2.19842	2.1153	2.85066	2.64025	2.28996	2.85066	CHROMOSOME_X	7200327	7203973	+	WBGene00016939		cds
Y53G8B.2	4	0.748353	0.52069	0.631163	0.210329	2.20107	4.09226	3.74069	4.40851	4.3265	3.95629	4.19819	CHROMOSOME_III	3101222	3103949	-	WBGene00021818		cds
C41H7.5	4	0.645513	0	0.406354	0.210329	2.37723	4.36757	4.25446	4.15607	4.22031	4.04375	4.36757	CHROMOSOME_II	3002521	3003803	+	WBGene00016575		cds
C41H7.6	4	0.645513	0	0.858642	0.210329	2.86939	5.14708	4.81342	4.90254	5.18108	4.89071	5.18108	CHROMOSOME_II	3000828	3002414	+	WBGene00016576		cds
F08F3.6	4	0.748353	0	1.15008	0.370268	3.47075	5.09722	5.42282	5.33608	5.46716	5.89183	5.89183	CHROMOSOME_V	5418024	5420023	-	WBGene00017263		cds
T23F2.5	4	1.0899	0.283709	0.996949	0.683918	2.84814	4.44457	4.42351	4.82121	4.73937	5.13477	4.85106	CHROMOSOME_X	5516667	5517121	-	WBGene00020738		cds
F10D7.5	4	1.0899	0	0.631163	0	2.36637	4.12526	4.06211	4.84524	4.1048	4.13302	4.84524	CHROMOSOME_X	17382921	17391488	-	WBGene00017342		cds
K04C1.5	4	0.748353	0	0	0.370268	2.8286	5.13374	5.12074	5.40676	5.09756	5.15561	5.40676	CHROMOSOME_X	14247983	14249779	+	WBGene00010555		cds
R04D3.2	4	0.645513	0	0.217437	0.39386	2.3053	4.34779	4.76502	4.78328	4.22031	4.5563	4.78328	CHROMOSOME_X	13284986	13286566	-	WBGene00011010		cds
T05H10.4	4	1.0899	0.463942	0.406354	0.210329	2.35684	4.41818	4.35861	4.91496	4.39057	4.73317	4.70463	CHROMOSOME_II	8053083	8054913	+	WBGene00011509		cds
F14D7.2	4	1.60389	0.982532	0.406354	0.5356	3.29546	4.4853	4.39232	4.79676	4.79047	4.89808	4.49173	CHROMOSOME_V	14291766	14293697	-	WBGene00008789		cds
K02B9.1	4	1.60389	0.463942	0.686727	0.370268	3.27462	5.12683	5.21604	5.39051	5.39108	5.80015	5.42988	CHROMOSOME_X	13926965	13929563	-	WBGene00010492	meg-1	cds
K08A8.1	4	1.89511	0.283709	0.47108	0.556656	3.83302	5.64263	5.75034	6.12112	6.1511	6.20608	5.92237	CHROMOSOME_X	7479201	7480955	+	WBGene00003185	mek-1	cds
W06D11.3	4	1.0899	0	0	0.5356	2.30676	4.19194	3.68811	4.14907	4.32425	3.9968	4.32425	CHROMOSOME_X	12298623	12299989	+	WBGene00012301		cds
T07C4.6	4	0.645513	0	0.406354	0	2.14517	3.42642	2.84412	3.00595	2.94287	3.17077	3.42642	CHROMOSOME_III	10339890	10341766	-	WBGene00006546	tbx-9	cds
T13H2.5	4	0.748353	0	0.47108	0.556656	2.36777	3.57409	3.74209	4.01689	3.18465	4.37616	4.37616	CHROMOSOME_X	4595970	4605903	-	WBGene00020496	spat-3	cds
R12C12.5	4	0.645513	1.20409	0.533026	1.10371	3.03675	4.2169	3.45922	3.59044	3.69079	3.54817	3.68387	CHROMOSOME_II	6044039	6045147	-	WBGene00020025		cds
Y71F9B.3	4	3.63402	4.21097	3.58193	3.74137	5.00014	5.74768	5.25197	5.48528	5.58097	5.40833	2.16575	CHROMOSOME_I	2730004	2731456	+	WBGene00022127	yop-1	cds
C04F12.1	4	0	0.283709	0.906233	0	1.97383	2.96834	3.74174	2.83331	3.26067	3.71445	3.74174	CHROMOSOME_I	9673658	9678544	-	WBGene00007297		cds
F20D1.1	4	0	0.283709	0.723047	0.39386	1.82359	2.94287	3.51942	3.24795	3.33139	3.75486	3.75486	CHROMOSOME_X	14968833	14970203	-	WBGene00008973		cds
R151.2	4	4.0628	4.31315	4.5769	4.40866	5.14126	5.44661	5.67174	5.48523	5.69649	5.75088	1.68807	CHROMOSOME_III	7209905	7215049	+	WBGene00020107		cds
F54D5.5	4	0	0	0.631163	0.370268	2.52573	4.18137	4.02076	3.62109	4.35852	4.04345	4.35852	CHROMOSOME_II	11564379	11566954	-	WBGene00010051		cds
Y37E11AR.5	4	0	0	0.631163	0	1.55454	3.0266	2.93901	2.24914	2.93896	2.69254	3.0266	CHROMOSOME_IV	3748198	3751096	-	WBGene00021372	ugt-45	cds
ZK662.4	4	0	0.463942	1.27677	0	2.46493	3.80181	4.02076	3.39127	4.18006	3.57599	4.18006	CHROMOSOME_X	15726061	15731957	+	WBGene00023497	lin-15B	cds
ZC53.7	4	0	0	0.290991	0	1.33054	2.8109	3.32837	2.24914	3.26692	2.55186	3.32837	CHROMOSOME_X	1915259	1917078	+	WBGene00004352	rgs-9	cds
F37C4.5	4	0	0	0.290991	1.08933	1.54026	3.62554	4.06239	3.13202	3.63959	3.62081	4.06239	CHROMOSOME_IV	3871823	3874410	-	WBGene00018145		cds
K10B3.7	4	0	0	0.775244	1.192	1.59231	3.70584	3.57839	3.10336	3.98303	4.08922	4.08922	CHROMOSOME_X	3112073	3113372	-	WBGene00001685	gpd-3	cds
K03B4.7	4	4.02354	3.93763	4.48567	4.57212	5.33164	5.92426	6.21571	5.73123	6.15665	6.05817	2.27807	CHROMOSOME_V	4691586	4692419	-	WBGene00019357	cpg-8	cds
C02D5.4	4	0.748353	0	0	0.183506	2.17641	3.7321	3.32744	2.99038	3.74361	3.68106	3.74361	CHROMOSOME_III	8552473	8553757	+	WBGene00043097		cds
F54D10.7	4	1.16618	0.283709	0.217437	0	2.11953	3.33276	3.10755	2.67661	3.58149	3.53017	3.58149	CHROMOSOME_II	3820154	3821314	-	WBGene00018808		cds
T24H7.5	4	1.23863	0.675026	0.573373	0.210329	3.50376	4.34561	3.8401	3.65613	4.55374	4.4564	4.34341	CHROMOSOME_II	6234452	6244202	-	WBGene00020784	tat-4	cds
F02H6.3	4	0.645513	0	0	0	2.24611	3.39192	2.52647	2.30054	2.40385	3.09759	3.39192	CHROMOSOME_IV	14203420	14205331	+	WBGene00008536		cds
T02G5.11	4	1.75393	1.02238	1.17651	1.68386	3.43949	4.17807	3.68993	3.60073	3.57394	4.13218	3.15569	CHROMOSOME_II	7078725	7081881	-	WBGene00020167		cds
F14H3.4	4	0	0	0.217437	0	2.16875	3.75501	3.63505	2.47865	3.25596	3.13437	3.75501	CHROMOSOME_V	16053879	16055051	-	WBGene00008823		cds
F40G12.11	4	0	0	0	0	1.93782	3.85542	3.52146	2.715	3.3299	3.433	3.85542	CHROMOSOME_V	14286156	14288041	+	WBGene00009606		cds
R05G9.3	4	0	0	0.290991	0.210329	2.27825	3.30803	3.02516	2.22274	3.0305	2.85004	3.30803	CHROMOSOME_II	6500364	6501486	-	WBGene00019905		cds
F28H6.4	4	0	0.283709	0	0.183506	1.50108	3.5311	2.93839	2.45616	3.39596	3.19489	3.5311	CHROMOSOME_X	14127812	14133458	+	WBGene00009233		cds
T12A2.15	4	0	0.283709	0	0.370268	1.86848	3.47259	2.74743	2.27507	3.46185	3.07235	3.47259	CHROMOSOME_III	6224378	6229351	-	WBGene00020443	esyt-2	cds
F49H12.1	4	0.645513	0.283709	0	0	1.97383	3.51345	3.63618	2.65703	3.51571	2.70864	3.63618	CHROMOSOME_X	2089660	2093240	+	WBGene00003087	lsy-2	cds
T22C1.4	4	2.24261	2.16128	2.12224	2.11532	3.01109	3.66503	3.51983	3.02135	3.63717	3.2181	1.54971	CHROMOSOME_I	7940127	7940752	-	WBGene00011915		cds
ZK177.1	4	0.645513	0	0.217437	0	1.67133	3.11088	3.18446	1.71672	2.74535	2.96485	3.18446	CHROMOSOME_II	5528122	5529620	+	WBGene00022669		cds
B0302.1	4	1.0899	0	0.217437	0	0.644543	2.34685	2.52647	1.75407	1.9556	1.82544	2.52647	CHROMOSOME_X	17186066	17193219	+	WBGene00002207	kin-25	cds
C10F3.5	4	0.748353	0	0.217437	0	0.508361	1.55446	1.75667	1.35238	1.54385	1.23039	1.75667	CHROMOSOME_V	5960567	5963820	-	WBGene00003954	pcm-1	cds
Y48G8AL.13	4	1.0899	0	0.217437	0.210329	0.88743	2.86828	2.93656	2.35017	2.40951	2.33408	2.93656	CHROMOSOME_I	1223959	1229284	-	WBGene00021691		cds
F44A6.1	4	1.42915	0	0.775244	0.664651	1.01766	3.85685	4.25569	3.64623	3.53007	3.26392	4.25569	CHROMOSOME_X	10197646	10200347	+	WBGene00009674	nucb-1	cds
F53H8.1	4	0.748353	0	0.47108	0.210329	0.612866	2.627	2.74604	2.32557	2.40669	2.4769	2.74604	CHROMOSOME_X	954932	957760	+	WBGene00000164	apm-3	cds
F46H5.2	4	1.80254	0	0.217437	0.346283	0.85672	2.91693	3.84141	3.13202	3.183	2.93715	3.84141	CHROMOSOME_X	7265609	7267840	+	WBGene00018518		cds
H16O14.1	4	0.748353	0	0	0	0.279439	1.33087	1.94649	1.35238	1.53869	0.980726	1.94649	CHROMOSOME_IV	6040964	6074494	+	WBGene00019205	kcc-2	cds
C34C12.5	4	1.70362	0.283709	1.10999	0.746918	1.41186	2.66726	3.18395	2.99038	2.74535	2.2222	2.90024	CHROMOSOME_III	3471989	3473710	+	WBGene00007924	rsu-1	cds
C28G1.3	4	0.645513	0	0	0	0.357971	2.14357	2.26348	2.27507	1.53869	1.82544	2.27507	CHROMOSOME_X	8831686	8835662	-	WBGene00016188	sec-15	cds
F22E12.4	4	1.23863	0	0	0	0.508361	3.63792	3.6358	4.14907	2.85165	2.55186	4.14907	CHROMOSOME_V	10468388	10476929	+	WBGene00001178	egl-9	cds
F18H3.3	4	1.75393	0	0.982581	0.645124	1.06871	4.00378	3.79311	3.92965	2.937	2.95138	4.00378	CHROMOSOME_X	13522779	13527345	-	WBGene00003903	pab-2	cds
K07E3.8	4	1.48978	0	0	0	1.04166	3.03931	3.39416	3.11776	2.40669	2.55186	3.39416	CHROMOSOME_X	8087340	8089629	-	WBGene00006890	vem-1	cds
B0416.5	4	0.748353	0.283709	0.631163	0.370268	1.53777	4.21507	4.18155	3.64623	3.58524	3.85531	3.93136	CHROMOSOME_X	9268575	9270794	-	WBGene00015181		cds
F19B10.2	4	0.645513	0	0.290991	0.210329	1.34989	3.54431	3.57957	3.2739	3.45912	3.44356	3.57957	CHROMOSOME_II	3675627	3676740	+	WBGene00017584		cds
F16H11.3	4	0.748353	0	0.217437	0	2.01076	4.51073	4.39298	3.81495	3.51571	3.51151	4.51073	CHROMOSOME_X	4647496	4649167	-	WBGene00017532		cds
F29G9.6	4	0.748353	0	0	0	1.18097	2.93575	2.64005	2.24914	2.39817	2.97943	2.97943	CHROMOSOME_V	6026313	6034797	-	WBGene00000980	dhs-17	cds
T16G12.8	4	1.16618	0.283709	0.775244	0.492542	1.68662	3.62871	3.68956	3.24795	2.74759	3.61147	3.40585	CHROMOSOME_III	10059211	10061895	+	WBGene00011809		cds
C06B3.4	4	0.645513	0	0	0	0.508361	2.79823	2.1153	2.03796	2.11059	2.17556	2.79823	CHROMOSOME_V	13906476	13908023	+	WBGene00007363	stdh-1	cds
C09D8.1	4	0.748353	0	0.406354	0	1.46605	2.77526	3.25748	3.10336	2.94091	2.28996	3.25748	CHROMOSOME_II	10968326	11012173	+	WBGene00004215	ptp-3	cds
C15H9.6	4	2.24261	1.8272	1.88098	1.46234	3.05956	5.47406	5.96399	5.56502	5.86271	5.24131	4.50165	CHROMOSOME_X	6088993	6092089	-	WBGene00002007	hsp-3	cds
Y49F6C.8	4	0.748353	0	0.47108	0.370268	1.46605	3.29802	3.7921	3.40905	3.64439	2.90891	3.7921	CHROMOSOME_II	3369178	3370148	-	WBGene00021730		cds
C52B9.8	4	0.748353	0	0.217437	0	0.85672	2.33711	2.74673	2.50079	2.64265	1.94278	2.74673	CHROMOSOME_X	4297836	4303160	-	WBGene00016868		cds
K07F5.12	4	1.23863	0.52069	0.775244	0.556656	1.86452	3.27672	3.02574	3.26099	2.94287	2.07632	2.75603	CHROMOSOME_IV	9855990	9857966	+	WBGene00010637		cds
F46H6.1	4	1.16618	0.283709	0	1.2054	1.34989	3.83242	3.45794	3.84122	3.52617	3.36211	3.84122	CHROMOSOME_X	4508480	4510936	+	WBGene00004356	rhi-1	cds
Y54G2A.11	4	1.16618	0.52069	0.47108	1.03987	1.01766	2.17673	1.9477	2.50079	2.27245	1.52155	2.02971	CHROMOSOME_IV	2765729	2771788	-	WBGene00021876		cds
B0454.9	4	0	0.463942	0.217437	0	0.19006	2.91625	2.52647	2.99038	2.39817	2.10206	2.99038	CHROMOSOME_II	3052599	3054351	-	WBGene00015200		cds
Y105C5A.1	4	0	0.463942	0.406354	0.183506	0.19006	2.29535	1.75528	2.54409	1.75105	1.52155	2.54409	CHROMOSOME_IV	15550821	15554688	-	WBGene00013632		cds
F08C6.6	4	0	0	0.217437	0.210329	0	2.48932	2.6408	2.95874	1.95172	1.52155	2.95874	CHROMOSOME_X	7568087	7569675	-	WBGene00017244	apy-1	cds
F11C1.2	4	0	0	0	0	0	1.20346	1.28024	1.40028	0.957729	0.924125	1.40028	CHROMOSOME_X	12985720	12987149	-	WBGene00008691	mff-1	cds
H01M10.1	4	0	0.463942	0.47108	0	0	1.80863	1.94649	1.71672	1.53351	1.23039	1.94649	CHROMOSOME_X	2578203	2580561	-	WBGene00019143		cds
C45B2.6	4	0	0	0	0	0.508361	1.85033	1.28024	1.75407	1.53869	1.27633	1.85033	CHROMOSOME_X	6053065	6057311	+	WBGene00016661		cds
F47A4.2	4	0	0	0.217437	0.210329	1.08847	3.4084	3.10755	3.14614	3.02682	2.51486	3.4084	CHROMOSOME_X	9810173	9822215	-	WBGene00001081	dpy-22	cds
T28F4.1	4	0	0	0.775244	0.514232	1.39058	3.84587	3.74174	4.03217	3.74025	2.72456	4.03217	CHROMOSOME_I	7472607	7476942	-	WBGene00012136		cds
Y47D3B.9	4	0	0.283709	0	0.210329	0.964751	3.0266	2.64155	2.99038	2.64506	1.82544	3.0266	CHROMOSOME_III	11463562	11470705	-	WBGene00012943	bed-2	cds
T14G8.3	4	0	0	0.406354	0	0.612866	3.54096	3.18549	3.77917	3.32841	2.12623	3.77917	CHROMOSOME_X	12861167	12869956	+	WBGene00011771		cds
C46H3.2	4	0	0.463942	0.290991	0	0.612866	1.87888	1.53642	2.06793	1.75105	1.52155	2.06793	CHROMOSOME_X	1211754	1220024	-	WBGene00016725		cds
F08B1.1	4	0	0	0.906233	0.210329	0.739939	1.94587	2.40229	2.32557	1.95172	1.08537	2.40229	CHROMOSOME_II	5322990	5340801	+	WBGene00006923	vhp-1	cds
Y8G1A.2	4	0	0	1.10999	0.994295	1.18416	3.12286	3.10647	3.45514	2.74759	1.6977	3.45514	CHROMOSOME_I	3748527	3753964	-	WBGene00002135	inx-13	cds
R06A10.2	4	0	0	0.573373	0.370268	0.357971	1.86397	1.53804	1.71672	1.27726	1.13609	1.86397	CHROMOSOME_I	1068594	1075013	+	WBGene00001745	gsa-1	cds
T01E8.2	4	0	0	0.217437	0	0.508361	1.18184	0.963749	1.40028	0.957729	0.534825	1.40028	CHROMOSOME_II	10218411	10219965	+	WBGene00004334	ref-1	cds
C44C1.4	4	0	0.283709	0	0	0	1.90688	1.28024	2.00735	1.28344	0.534825	2.00735	CHROMOSOME_X	970592	974786	-	WBGene00016643	vps-45	cds
F58A3.1	4	0.645513	0	0.406354	0.346283	0.19006	2.47957	2.11422	2.45616	1.7555	0.980726	2.47957	CHROMOSOME_X	11028851	11040539	+	WBGene00002261	ldb-1	cds
C15C7.5	4	0.748353	0	0.217437	0.39386	0.19006	2.25452	1.75528	1.79048	2.40951	1.27633	2.40951	CHROMOSOME_X	3151135	3152453	-	WBGene00015791		cds
C29F9.7	4	0.645513	0.463942	0.217437	0.183506	0.319239	2.43363	1.94649	2.27507	2.40951	1.52155	2.25012	CHROMOSOME_III	89450	94808	-	WBGene00003931	pat-4	cds
R07E3.5	4	0	0	0	0	0	2.42542	2.4014	1.97608	2.52689	1.59429	2.52689	CHROMOSOME_X	10324123	10327396	-	WBGene00011106	acl-5	cds
ZC506.1	4	0.748353	0.283709	0	0.210329	0.357971	2.68354	2.84607	2.77999	3.39596	2.1996	3.39596	CHROMOSOME_X	9958897	9964685	+	WBGene00013919		cds
C33G3.6	4	0	0	0	0	0.19006	0.937693	0.963749	0.793736	1.28344	0.534825	1.28344	CHROMOSOME_X	14080321	14084256	-	WBGene00007906		cds
F22F7.5	4	0	0	0	0	0.19006	1.08957	0.963749	0.793736	1.28344	0.534825	1.28344	CHROMOSOME_V	2106397	2109386	-	WBGene00000514	ckb-4	cds
D2021.1	4	0	0	0	0	0	1.80715	1.75805	1.40028	2.2631	1.08537	2.2631	CHROMOSOME_X	8557099	8563186	+	WBGene00017046	utx-1	cds
C49C3.15	4	0	0	0	0.183506	0.19006	1.20346	1.28024	0.863753	0.973102	0.534825	1.28024	CHROMOSOME_IV	17334156	17335052	+	WBGene00008204		cds
F54C9.1	4	1.0899	0.982532	1.13716	1.32515	0.968452	2.87503	3.45964	2.45616	2.64506	1.914	2.49119	CHROMOSOME_II	8559342	8561301	-	WBGene00002065	iff-2	cds
F13E6.5	4	0	0	0	0.210329	0.357971	2.02338	2.40229	2.24914	1.9556	0.924125	2.40229	CHROMOSOME_X	10695244	10697834	+	WBGene00008749		cds
F45E6.2	4	0	0	0	0.346283	0.768972	2.27401	2.74673	2.30054	2.40101	1.27633	2.74673	CHROMOSOME_X	12480880	12484811	+	WBGene00000222	atf-6	cds
T19C3.4	4	0	0.283709	0	0	0.357971	2.49809	3.02516	2.27507	2.52689	1.23039	3.02516	CHROMOSOME_III	618245	620209	-	WBGene00020562		cds
ZC168.1	4	0	0	0	0	0	1.40932	1.75805	1.30282	1.28344	0.534825	1.75805	CHROMOSOME_IV	10716636	10721735	+	WBGene00003568	ncx-3	cds
ZK688.7	4	0.645513	0	0.290991	0.39386	0.47351	3.01443	3.6343	3.45514	2.94482	1.82544	3.6343	CHROMOSOME_III	7910694	7911565	-	WBGene00022802		cds
F55C10.1	4	0.748353	0.283709	0.217437	0	0.768972	2.76802	3.02631	2.06793	1.94394	1.40414	3.02631	CHROMOSOME_V	11375724	11378039	+	WBGene00000554	cnb-1	cds
F55D10.3	4	0	0	0	0	0.19006	1.86539	1.75667	1.30282	0.973102	0.534825	1.86539	CHROMOSOME_X	4712250	4715051	+	WBGene00018878	glit-1	cds
C55B6.2	4	0	0.463942	0	0.183506	0.319239	1.92	1.75805	1.30282	1.53869	0.980726	1.92	CHROMOSOME_X	7194521	7198236	+	WBGene00001025	dnj-7	cds
K11C4.3	4	0	0.283709	0	0	0.357971	2.07242	1.75805	1.35238	1.54385	0.534825	2.07242	CHROMOSOME_V	6881326	6891385	+	WBGene00006803	unc-70	cds
Y49A10A.2	4	0	0	0	0.210329	0	1.22475	0.963749	0.793736	0.965436	0.534825	1.22475	CHROMOSOME_X	10371016	10372294	-	WBGene00044949		cds
B0348.4	4	0	0	0.406354	0.210329	0.19006	1.7016	2.52728	2.22274	2.40101	1.82544	2.52728	CHROMOSOME_V	20825	43971	+	WBGene00001177	egl-8	cds
E02H1.7	4	0	0	0.290991	0.183506	0	1.03986	1.94649	1.67837	1.76877	1.08537	1.94649	CHROMOSOME_II	9598137	9605466	-	WBGene00003618	nhr-19	cds
F43H9.1	4	0	0	0.406354	0.210329	0.437796	1.06369	1.75805	1.71672	1.7555	1.08537	1.75805	CHROMOSOME_V	8022274	8023288	+	WBGene00001152	ech-3	cds
C17H11.2	4	0	0	0	0.210329	0.508361	2.24304	3.52106	2.99038	2.64745	2.17556	3.52106	CHROMOSOME_X	8169880	8172818	+	WBGene00015922		cds
Y23H5A.5	4	0	0	0	0	0.19006	1.97261	3.18498	2.63717	2.52949	1.63011	3.18498	CHROMOSOME_I	2606756	2617363	+	WBGene00000832	ctn-1	cds
R13F6.9	4	0	0	0	0	0	1.1126	1.75805	1.30282	1.54385	0.980726	1.75805	CHROMOSOME_III	6860909	6863915	-	WBGene00004857	sma-3	cds
C28D4.1	4	0	0	0.217437	0	0	1.20346	1.53965	1.40028	1.28959	0.742567	1.53965	CHROMOSOME_IV	9728655	9731060	+	WBGene00003690	nhr-100	cds
T07A9.12	4	0	0	0.406354	0	0	1.44794	1.75805	1.71672	1.7555	0.980726	1.75805	CHROMOSOME_IV	414250	415679	+	WBGene00020299		cds
C34F6.9	4	0	0.814436	0	0	0.19006	1.82266	2.84672	2.5226	2.40101	1.63011	2.84672	CHROMOSOME_X	11217696	11222746	-	WBGene00007943		cds
Y48C3A.4	4	0	0.463942	0	0.210329	0	1.48372	1.94528	2.30054	1.54899	1.40414	2.30054	CHROMOSOME_II	13279703	13285747	-	WBGene00012988	ztf-22	cds
B0391.5	4	0	0	0	0	0	1.13527	1.94649	1.30282	0.957729	0.980726	1.94649	CHROMOSOME_V	15605705	15610361	-	WBGene00007162	fbxa-153	cds
D1025.1	4	0	0.283709	0.290991	0.210329	0	1.68633	2.84607	2.03796	1.28344	1.08537	2.84607	CHROMOSOME_X	14520693	14522630	+	WBGene00008353		cds
C44C1.2	4	0	0	0	0	0.644543	1.60576	2.52484	1.67837	1.75994	1.48288	2.52484	CHROMOSOME_X	957883	960564	+	WBGene00016642		cds
T04D3.1	4	0	0	0.290991	0	0.47351	2.07242	2.93778	2.06793	1.76436	1.40414	2.93778	CHROMOSOME_I	13302745	13304293	-	WBGene00011431		cds
F30A10.1	4	0	0.283709	0.217437	0	0.357971	1.30901	2.52728	1.35238	1.54899	1.52155	2.52728	CHROMOSOME_I	9472634	9474786	-	WBGene00009260	calm-1	cds
C53D5.1	4	0.748353	0.52069	0.217437	0.5356	0.993268	1.87747	3.1081	2.69594	2.2631	1.88464	2.89066	CHROMOSOME_I	291216	305461	+	WBGene00016902		cds
F28A10.6	4	0.645513	0	0	0.514232	0.547346	2.40495	3.46007	3.36736	2.11753	2.5339	3.46007	CHROMOSOME_II	846874	848609	-	WBGene00017874	acdh-9	cds
Y55B1AL.1	4	0.748353	0.52069	0.290991	0.492542	0.357971	1.22475	1.75805	1.71672	1.28959	1.27633	1.46706	CHROMOSOME_III	573981	576437	+	WBGene00021903		cds
F37H8.1	4	0.748353	0.283709	0	0.39386	0.19006	0.827736	1.53804	1.40028	1.27726	1.23039	1.53804	CHROMOSOME_II	11183016	11184750	-	WBGene00003046	lir-3	cds
C29F7.10	4	0	0	0	0	0	0.990982	0.963749	1.71672	2.26622	1.52155	2.26622	CHROMOSOME_X	13430171	13430978	-	WBGene00206389		cds
Y75B8A.9	4	0	0	0	0	0.19006	0.73862	0.963749	1.35238	1.54899	1.13609	1.54899	CHROMOSOME_III	12171251	12177144	-	WBGene00001636	gly-11	cds
C56G2.15	4	1.54797	1.58842	1.62919	1.77081	1.64024	2.38617	2.26348	3.26099	3.11137	2.6755	1.71302	CHROMOSOME_III	6366528	6367769	-	WBGene00016983		cds
T06H11.4	4	0	0	0	0.183506	0.357971	1.94587	1.28024	2.67661	2.75205	2.17556	2.75205	CHROMOSOME_X	10136068	10138560	-	WBGene00003384	moc-1	cds
C42D8.3	4	0	0.283709	0.217437	0.183506	0	0.578957	0.560897	1.35238	1.28344	1.08537	1.35238	CHROMOSOME_X	5087809	5092480	+	WBGene00006862	pnk-4	cds
C44C10.4	4	0	0.463942	0	0	0.19006	1.35038	0.963749	2.24914	1.7555	1.55921	2.24914	CHROMOSOME_X	11693398	11695682	+	WBGene00008085		cds
F52B5.7	4	0	0.283709	0.533026	0	0.47351	1.35038	0.963749	2.27507	1.9556	1.36215	2.27507	CHROMOSOME_I	8313221	8315337	-	WBGene00009923		cds
D2021.2	4	0	0	0	0	0.580478	1.83511	1.75667	2.83331	2.26934	1.82544	2.83331	CHROMOSOME_X	8552209	8556302	+	WBGene00044071	tag-233	cds
F08G12.4	4	0	0	0	0	0.357971	1.20346	1.53642	2.27507	1.76436	1.73108	2.27507	CHROMOSOME_X	11307296	11308257	+	WBGene00006922	vhl-1	cds
T26C11.4	4	0	0	0	0	0.508361	2.10843	1.94892	3.2739	2.52428	2.58793	3.2739	CHROMOSOME_X	1840561	1845531	-	WBGene00020830		cds
F25H2.6	4	3.21109	3.26685	3.31951	3.56837	3.716	4.09485	4.18	4.74896	4.4275	4.2163	1.53787	CHROMOSOME_I	10554355	10558039	+	WBGene00009120		cds
F02D10.6	4	0	0	0	0	0	1.74801	1.53965	2.73382	1.7555	1.40414	2.73382	CHROMOSOME_X	13449588	13451603	-	WBGene00008526		cds
T05F1.13	4	0	0	0	0	0	0.937693	0.963749	1.75407	0.957729	1.13609	1.75407	CHROMOSOME_I	9650514	9652805	+	WBGene00011497		cds
F52E10.1	4	0	0	0	0	0.357971	1.76264	1.28024	3.26099	1.75994	1.7956	3.26099	CHROMOSOME_X	16275696	16282375	+	WBGene00004745	sdc-1	cds
K09F5.5	4	0	0	0	0	0	1.01563	0.560897	1.71672	0.957729	1.23039	1.71672	CHROMOSOME_X	7733288	7736219	-	WBGene00019584	set-12	cds
F49H12.5	4	0	0	0.217437	0.5356	0.146475	1.24792	1.27832	1.71672	1.53869	1.13609	1.71672	CHROMOSOME_X	2074442	2075938	+	WBGene00018656		cds
F29G9.4	4	0.645513	0.814436	0	0.5356	0.612866	1.6219	1.94649	3.39127	2.40101	1.914	3.39127	CHROMOSOME_V	6003584	6016070	+	WBGene00001345	fos-1	cds
T24C2.2	4	0	0	0	0	0	1.01563	1.27832	2.27507	1.94394	1.08537	2.27507	CHROMOSOME_X	14545785	14546745	+	WBGene00011981		cds
Y76A2A.2	4	2.80523	3.0664	2.88402	3.2162	2.94974	3.3644	3.52065	4.01689	3.84273	3.59425	1.21166	CHROMOSOME_III	13439627	13455206	-	WBGene00000834	cua-1	cds
C46F11.6	4	0.748353	0.463942	0	0.210329	0	1.38862	1.27832	2.00735	1.76436	0.980726	2.00735	CHROMOSOME_III	3667333	3670420	-	WBGene00008121		cds
D1054.10	4	0.748353	0.463942	0	0	0.19006	1.79445	1.53642	2.22274	1.54899	1.32086	2.22274	CHROMOSOME_V	10791955	10792810	-	WBGene00008377		cds
AH9.2	4	0	0	0	0	0.768972	2.61814	3.46049	1.71672	2.25683	2.80443	3.46049	CHROMOSOME_X	2255840	2258073	-	WBGene00000797	crn-4	cds
C23H3.1	4	0	0	0	0.183506	0.644543	2.17673	3.02574	1.35238	1.7555	2.19854	3.02574	CHROMOSOME_II	69660	71279	+	WBGene00001193	egl-26	cds
C05E11.1	4	0	0	0	0.346283	1.18097	2.82637	3.88846	1.67837	2.40385	2.64158	3.88846	CHROMOSOME_X	4588739	4590420	+	WBGene00015492	lnp-1	cds
C02F5.12	4	0.645513	0.283709	0.217437	0.683918	0.964751	2.88174	3.57996	2.06793	2.12098	2.85072	3.36252	CHROMOSOME_III	8240807	8242932	-	WBGene00015352		cds
R03A10.4	4	0	0	0	0.210329	0.612866	2.30643	3.02459	1.97608	1.94394	2.58874	3.02459	CHROMOSOME_X	15441662	15443572	+	WBGene00010984	nkat-3	cds
T10D4.6	4	0	0	0	0.210329	0.508361	1.4278	1.94528	0.863753	1.28344	1.99744	1.99744	CHROMOSOME_II	3119334	3123187	+	WBGene00020408		cds
Y66A7A.8	4	0	0	0	0	0.508361	1.30901	1.75667	0.863753	0.965436	1.63011	1.75667	CHROMOSOME_III	11633117	11636740	-	WBGene00006552	tbx-33	cds
F14F3.2	4	0	0	0	0	0.357971	1.68633	2.26543	0.793736	0.965436	1.59429	2.26543	CHROMOSOME_X	10524836	10528375	+	WBGene00008805	git-1	cds
F21D5.4	4	0	0.463942	0	0.183506	0.768972	2.15355	2.64005	0.863753	1.53869	1.88464	2.64005	CHROMOSOME_IV	8737848	8739086	+	WBGene00009009		cds
F52H2.7	4	0	0	0	0	0.580478	2.07242	1.9477	0.793736	0.957729	1.94278	2.07242	CHROMOSOME_X	2566536	2572646	-	WBGene00018719		cds
T04F8.2	4	0	0	0.217437	0	0.508361	2.41522	2.6408	0.793736	1.27105	2.64158	2.64158	CHROMOSOME_X	11653493	11656505	-	WBGene00011441		cds
C01B7.1	4	0	0	0	0	0.146475	1.82266	2.4014	0.863753	2.12443	2.05129	2.4014	CHROMOSOME_V	8786529	8792753	+	WBGene00015274	ztf-12	cds
F21D12.1	4	0	0	0	0	0	1.6553	1.94892	0.793736	1.74658	1.82544	1.94892	CHROMOSOME_II	7339188	7349433	+	WBGene00003620	nhr-21	cds
C54H2.3	4	0	0.283709	0.217437	0.183506	0.508361	2.98911	3.18498	1.35238	3.26067	3.19489	3.26067	CHROMOSOME_X	5760254	5763341	-	WBGene00016937	tag-294	cds
K08A2.1	4	0.645513	0.52069	0.775244	0.39386	0.71031	2.33506	2.74743	1.35238	2.39817	2.33408	2.35357	CHROMOSOME_II	2997024	3000656	+	WBGene00019511		cds
C06A6.5	4	0	0	0.290991	0.370268	0.508361	2.46174	2.93901	0.793736	2.52949	2.70864	2.93901	CHROMOSOME_IV	7832331	7834663	-	WBGene00015510		cds
K06A1.5	4	0	0	0	0.210329	0.19006	2.46081	3.25845	0.863753	2.11753	2.24549	3.25845	CHROMOSOME_II	6450898	6453366	-	WBGene00019427		cds
R13.4	4	0	0.283709	0	0.210329	0.19006	2.31534	2.74743	1.30282	1.94784	2.35468	2.74743	CHROMOSOME_IV	10812389	10825262	+	WBGene00011259	miz-1	cds
C06A6.2	4	0	0	0.217437	0	0.357971	1.60576	2.1153	0.793736	1.53869	2.02461	2.1153	CHROMOSOME_IV	7846630	7854550	+	WBGene00015507		cds
C37C3.8	4	0	0	0.290991	0	0.146475	1.80863	2.64155	0.793736	1.75105	2.39689	2.64155	CHROMOSOME_V	7844325	7847145	-	WBGene00016500	tag-253	cds
K08H2.6	4	0	0	0.573373	0	0.19006	2.3757	2.74743	0.793736	1.75105	2.82002	2.82002	CHROMOSOME_X	13245321	13246975	+	WBGene00001995	hpl-1	cds
F10G7.5	4	0	0.283709	0.290991	0.346283	0.768972	2.53355	2.40229	0.863753	2.11753	2.51486	2.53355	CHROMOSOME_II	4693442	4696405	+	WBGene00017369		cds
F17A9.6	4	0	0	0	0	0.85672	2.84712	2.93901	0.793736	2.25683	2.37594	2.93901	CHROMOSOME_V	6118315	6120184	-	WBGene00017538	ceh-49	cds
M163.4	4	0	0.463942	0	0	0.644543	1.94587	2.40229	0.793736	2.25997	2.55186	2.55186	CHROMOSOME_X	14480502	14484586	+	WBGene00001583	gfi-3	cds
C15B12.7	4	0	0	0.217437	0	0	2.54295	2.6408	0.793736	1.75994	2.37594	2.6408	CHROMOSOME_X	6499872	6504576	-	WBGene00000393	cdf-1	cds
Y71A12B.12	4	0	0	0.217437	0	0.19006	2.57733	2.26446	0.863753	1.54385	2.12735	2.57733	CHROMOSOME_I	14004447	14008459	+	WBGene00013509		cds
C31E10.5	4	0	0	0	0	0.19006	1.97261	1.53804	0.793736	1.28344	1.63011	1.97261	CHROMOSOME_X	13991427	13995765	-	WBGene00007846		cds
F45C12.7	4	0	0	0.406354	0	0	2.35754	2.84607	0.863753	1.53869	1.82544	2.84607	CHROMOSOME_II	1715168	1716503	+	WBGene00018438	btb-6	cds
F53B3.5	4	0	0	0.573373	0.210329	0.146475	2.33711	2.52728	0.793736	1.7555	1.99744	2.52728	CHROMOSOME_X	2872800	2879611	-	WBGene00018743		cds
F21F3.7	4	1.97712	2.19527	2.50959	2.24482	2.63486	3.28741	3.51983	2.65703	3.17804	3.433	1.54271	CHROMOSOME_I	4918393	4920867	+	WBGene00017676		cds
Y71G12B.20	4	0	0.463942	0.858642	0	0.68006	1.97261	2.52484	0.793736	1.53351	1.96974	2.52484	CHROMOSOME_I	1644590	1651382	-	WBGene00003111	mab-20	cds
B0041.11	4	0	0.283709	0	0.183506	0	1.08957	1.94649	0.793736	0.973102	1.7637	1.94649	CHROMOSOME_I	4661116	4662200	-	WBGene00206362		cds
F42E11.2	4	0	0.52069	0.573373	0.183506	0.19006	1.99757	3.18549	1.35238	1.93612	2.49557	3.18549	CHROMOSOME_X	11368655	11374292	+	WBGene00009632	ttyh-1	cds
C31E10.6	4	0	0	0.217437	0	0	1.55446	2.2664	0.793736	0.965436	1.82544	2.2664	CHROMOSOME_X	13996238	13999282	+	WBGene00007847		cds
Y19D10A.16	4	0	0	0	0	0	1.60576	2.64155	0.863753	0.567086	1.914	2.64155	CHROMOSOME_V	2392771	2394146	+	WBGene00044734		cds
C27A7.5	4	0	0.52069	0.723047	0.957329	0.85672	2.09451	3.02459	2.03796	1.94784	2.85072	3.02459	CHROMOSOME_V	12154856	12162280	-	WBGene00007756		cds
M02A10.3	4	0	0.283709	0.573373	0.892559	0.47351	2.98222	3.51983	2.47865	2.52428	3.28655	3.51983	CHROMOSOME_X	720325	725956	-	WBGene00004829	sli-1	cds
C29F7.4	4	0	0	0	0	0	1.40932	2.40229	1.30282	1.53869	2.17556	2.40229	CHROMOSOME_X	13421754	13423343	-	WBGene00001435	fkh-3	cds
F31E8.4	4	0	0	0.217437	0.183506	0	2.22201	3.10701	2.03796	1.95172	3.13492	3.13492	CHROMOSOME_II	6799076	6800101	-	WBGene00017954		cds
T05C1.4	4	0	0	0	0	0	1.48372	2.11422	1.40028	1.28344	1.82544	2.11422	CHROMOSOME_II	4491145	4505144	-	WBGene00020251	camt-1	cds
F59F4.3	4	0	0	0	0.492542	0.19006	1.53754	2.6423	1.30282	1.53351	1.82544	2.6423	CHROMOSOME_X	15842289	15847520	-	WBGene00010338		cds
C07A12.7	4	0	0	0	0	0.19006	1.89225	1.9477	1.30282	1.7555	1.66507	1.9477	CHROMOSOME_X	4517715	4521041	-	WBGene00015561		cds
F47G4.2	4	0	0	0.290991	0	0.19006	1.98515	2.26738	1.35238	1.94394	1.73108	2.26738	CHROMOSOME_I	14078187	14082524	-	WBGene00009823	gadr-6	cds
K12B6.1	4	0	0.283709	0.217437	0	0.319239	1.65366	1.75667	1.30282	1.75994	1.52155	1.75994	CHROMOSOME_V	6303754	6308315	+	WBGene00019666	sago-1	cds
F56F10.4	4	0	0.283709	0.217437	0	0.644543	2.2964	2.39963	1.30282	2.11753	1.94278	2.39963	CHROMOSOME_X	864929	871078	-	WBGene00018987	lgl-1	cds
T20F10.2	4	0	0.463942	0.686727	0.210329	0.508361	3.09362	2.74743	2.00735	2.52949	2.37594	3.09362	CHROMOSOME_I	10298206	10300578	+	WBGene00011864		cds
C13C4.2	4	0	0	0	0	0	1.01563	1.27832	0.793736	1.28959	0.924125	1.28959	CHROMOSOME_V	12101267	12103267	+	WBGene00007547	nhr-154	cds
F42F12.3	4	0	0	0	0	0	1.89225	2.52647	1.30282	1.9556	1.73108	2.52647	CHROMOSOME_X	12350520	12351678	+	WBGene00009635		cds
Y39G8B.2	4	0	0	0	0	0	1.6553	2.40229	1.30282	1.7555	1.52155	2.40229	CHROMOSOME_II	13973616	13976147	-	WBGene00012723		cds
R06B10.5	4	0	0.283709	0	0.370268	0.19006	2.32523	2.6423	1.35238	2.26934	1.73108	2.6423	CHROMOSOME_III	977375	988437	+	WBGene00019915	tbc-10	cds
C17C3.1	4	0	0.283709	0.217437	0.645124	0.547346	2.44274	2.84477	2.03796	1.94394	1.88596	2.84477	CHROMOSOME_II	5570620	5574926	+	WBGene00015887		cds
M03F4.7	4	0.645513	0.72418	0.723047	1.26245	0.943201	3.52772	4.18155	3.2348	3.26067	3.34064	3.53604	CHROMOSOME_X	4969502	4970882	-	WBGene00019760	calu-1	cds
C41H7.9	4	0	0	0	0.183506	0.508361	2.64291	2.74743	2.06793	2.2631	2.10206	2.74743	CHROMOSOME_II	3012084	3012236	-	WBGene00044370		cds
F55A4.1	4	0	0	0	0	0.146475	2.27508	2.26543	1.75407	1.75105	1.52155	2.27508	CHROMOSOME_X	1035543	1037064	+	WBGene00018853	sec-22	cds
C42D4.6	4	0	0	0.217437	0	0	2.15471	3.10755	1.79048	1.7555	2.10206	3.10755	CHROMOSOME_IV	7168698	7169334	+	WBGene00004822	skr-16	cds
F14H8.1	4	0	0	0.217437	0	0	1.35038	1.9477	1.35238	1.28344	1.40414	1.9477	CHROMOSOME_V	15011853	15014205	-	WBGene00008832	obr-2	cds
K01D12.12	4	0	0	0.217437	0	0.357971	2.40593	2.84542	2.03796	1.76436	1.99744	2.84542	CHROMOSOME_V	12412482	12413679	-	WBGene00010471	cdr-6	cds
T07F12.2	4	0	0	0	0.183506	0.357971	2.66726	3.51983	2.73382	1.95172	2.39596	3.51983	CHROMOSOME_X	4890191	4892298	+	WBGene00020322		cds
F09B12.2	4	0.748353	0	0.573373	0.183506	0.319239	3.44157	3.84174	2.45616	2.94091	2.97943	3.84174	CHROMOSOME_X	15097997	15100335	-	WBGene00008606	dhhc-1	cds
Y41D4B.9	4	0	0	0.217437	0	0	1.87888	2.1153	1.40028	1.53351	1.63011	2.1153	CHROMOSOME_IV	1613896	1616765	+	WBGene00003712	nhr-122	cds
C29F7.3	4	0.748353	0.283709	0.406354	0.183506	0.993268	2.42349	3.10864	1.71672	2.10711	2.05011	2.92513	CHROMOSOME_X	13418781	13419841	-	WBGene00007812		cds
D2089.5	4	0	0	0	0	0.508361	1.6709	1.9477	0.793736	1.27726	0.924125	1.9477	CHROMOSOME_II	10690392	10693752	-	WBGene00001522	gbh-1	cds
T24E12.11	4	0	0	0.217437	0	0.644543	2.34584	2.52647	1.35238	1.7555	1.73108	2.52647	CHROMOSOME_II	3778409	3779558	-	WBGene00020778		cds
ZK20.6	4	0	0	0.217437	0	0.612866	3.05785	3.32837	1.67837	2.40101	1.99744	3.32837	CHROMOSOME_II	11654148	11657109	-	WBGene00013926	nep-1	cds
EEED8.15	4	0	0.283709	0.47108	0	0.357971	2.10843	2.6408	1.35238	1.53869	1.36215	2.6408	CHROMOSOME_II	5419231	5421074	+	WBGene00017143		cds
F36D1.1	4	0	0.283709	0.217437	0	0.580478	2.25344	2.26543	1.40028	1.28344	1.23039	2.26543	CHROMOSOME_I	11276484	11280012	-	WBGene00009461	madf-2	cds
T04G9.5	4	0	0.859132	1.57132	0.5356	2.16714	4.67718	4.81459	4.22758	4.25867	3.61187	4.81459	CHROMOSOME_X	767029	768069	-	WBGene00020216	trap-2	cds
T16G12.4	4	0.645513	1.95475	1.84052	1.11794	1.93782	3.56247	4.2552	3.46643	3.32541	3.19489	3.60968	CHROMOSOME_III	10057754	10058593	+	WBGene00011805		cds
C08A9.6	4	0	0	0	0	0	1.48372	1.94649	0.863753	0.965436	1.08537	1.94649	CHROMOSOME_X	17094209	17096463	-	WBGene00015586		cds
T02G5.1	4	0	0	0	0	0	1.53754	1.75805	0.863753	0.957729	1.23039	1.75805	CHROMOSOME_II	7098789	7099242	+	WBGene00020161		cds
C43H6.1	4	0	0	0	0.210329	0.19006	1.58944	1.75805	0.793736	0.965436	1.13609	1.75805	CHROMOSOME_X	2409683	2412959	+	WBGene00016614		cds
D1069.4	4	0	0	0	0	0	1.58944	1.75667	0.793736	0.55692	0.980726	1.75667	CHROMOSOME_II	348242	350587	-	WBGene00017038	dmsr-4	cds
F41B4.3	4	0	0	0	0	0	1.33087	1.9477	0.793736	0.567086	1.13609	1.9477	CHROMOSOME_X	6835445	6836216	-	WBGene00018259		cds
T07H6.2	4	0	0	0	0	0	1.60576	1.9477	0.793736	0.55692	1.27633	1.9477	CHROMOSOME_X	6293091	6298161	+	WBGene00003394	mom-1	cds
F25E2.5	4	0	0	0	0	0	1.57119	1.75805	1.40028	0.567086	1.23039	1.75805	CHROMOSOME_X	817926	825474	-	WBGene00000899	daf-3	cds
F48B9.8	4	0	0	0	0	0.19006	1.46407	1.94649	1.40028	0.55692	1.08537	1.94649	CHROMOSOME_X	2174022	2176406	-	WBGene00018593		cds
T20D4.6	4	0	0	0	0	0.146475	1.1126	1.53965	0.863753	0.55692	0.806592	1.53965	CHROMOSOME_V	3410517	3412959	+	WBGene00020612	arrd-22	cds
C46C11.1	4	0	0	0	0	0.19006	2.26484	2.4014	1.79048	1.27105	2.31219	2.4014	CHROMOSOME_X	4637308	4643598	+	WBGene00016704		cds
W04E12.2	4	0	0	0	0	0	1.24792	1.28024	0.793736	0.567086	1.13609	1.28024	CHROMOSOME_V	19739660	19741068	-	WBGene00012247		cds
T25G12.7	4	0	0	0	0.183506	0.19006	2.08412	1.9477	1.30282	0.973102	2.1996	2.1996	CHROMOSOME_X	17230645	17235763	-	WBGene00000993	dhs-30	cds
F22B8.7	4	0	0.463942	0.217437	0.183506	0.319239	2.07242	2.1153	1.30282	0.973102	1.7956	2.1153	CHROMOSOME_V	16095204	16097300	+	WBGene00009049		cds
C50F2.6	4	0.748353	0.675026	1.20247	0.514232	0.401176	3.09362	3.02631	2.30054	1.7555	2.437	2.69244	CHROMOSOME_I	3898049	3899909	-	WBGene00001430	fkb-5	cds
C14F5.5	4	0	0	0.406354	0.514232	1.06525	2.11866	3.02516	1.40028	3.32691	2.64079	3.32691	CHROMOSOME_X	7959779	7961677	-	WBGene00004774	sem-5	cds
C18D1.1	4	0	0	0.290991	0.210329	1.57112	2.60195	3.25894	1.30282	2.93896	2.39689	3.25894	CHROMOSOME_II	10061486	10074384	-	WBGene00000995	die-1	cds
F20D1.2	4	0	0.52069	0	0	1.2679	2.94861	3.52024	1.71672	3.84064	2.55186	3.84064	CHROMOSOME_X	14970681	14974706	+	WBGene00008974	tbc-1	cds
F23D12.2	4	0	0	0	0	0.508361	1.89225	2.52647	0.793736	2.40951	1.40414	2.52647	CHROMOSOME_X	14416048	14421402	-	WBGene00009086		cds
Y40C5A.4	4	0	0	0	0	0.319239	1.74801	1.75667	0.793736	1.95172	1.32086	1.95172	CHROMOSOME_IV	7349278	7364206	-	WBGene00021497		cds
Y47D3B.11	4	0	0	0	0	0.19006	1.4278	1.53965	0.793736	1.74658	0.980726	1.74658	CHROMOSOME_III	11456777	11462782	+	WBGene00012944		cds
F53B3.1	4	0	0.52069	0	0	0.357971	2.08412	2.2664	1.35238	2.51905	1.88464	2.51905	CHROMOSOME_X	2853670	2857595	-	WBGene00018740	tra-4	cds
W01G7.1	4	0	0.463942	0	0.210329	0.19006	1.98515	2.11422	0.793736	1.9556	1.73108	2.11422	CHROMOSOME_II	14033159	14037647	-	WBGene00000901	daf-5	cds
F08B6.3	4	1.16618	1.30212	1.27677	0.994295	0.939435	2.56903	3.10701	1.71672	3.11311	2.51486	2.17367	CHROMOSOME_I	6758169	6760168	-	WBGene00017240		cds
F17A2.13	4	0	0	0.406354	0	0	1.68794	2.52565	0.793736	2.11406	1.59429	2.52565	CHROMOSOME_X	12321598	12322925	+	WBGene00008904		cds
F33E2.5	4	0	0	0.217437	0	0.146475	1.50127	2.40317	0.863753	1.53351	1.36215	2.40317	CHROMOSOME_I	12591110	12597432	-	WBGene00009361		cds
ZK154.4	4	0	0	0.217437	0.210329	0.19006	2.14357	2.64005	0.793736	1.75994	1.27633	2.64005	CHROMOSOME_X	7776979	7782387	-	WBGene00022666		cds
Y34B4A.3	4	0	0.463942	0	0.210329	0.19006	2.36615	2.93839	0.793736	2.84957	1.08537	2.93839	CHROMOSOME_X	5275535	5278485	+	WBGene00002031	hst-6	cds
C31E10.7	4	0	0.283709	0	0	0	1.1126	1.75667	0.793736	1.28959	0.534825	1.75667	CHROMOSOME_X	14001833	14003000	+	WBGene00007848		cds
T12B3.3	4	0	0	0	0.210329	0.357971	2.2209	3.45922	1.71672	2.75205	1.55921	3.45922	CHROMOSOME_IV	7375161	7376627	+	WBGene00020446		cds
Y71G12B.23	4	0	0	0	0	0	1.08957	2.52728	0.863753	1.75994	1.08537	2.52728	CHROMOSOME_I	1670081	1672744	-	WBGene00022158		cds
C31H5.4	4	0	0	0	0	0.357971	1.28894	2.40317	0.793736	1.28344	0.924125	2.40317	CHROMOSOME_I	9042267	9042592	-	WBGene00007855		cds
ZC376.4	4	0	0	0	0	0.19006	1.18184	2.1153	0.863753	0.965436	0.534825	2.1153	CHROMOSOME_V	14178064	14179587	+	WBGene00013876	ceh-74	cds
F55A11.1	4	3.56691	3.94764	3.85343	3.9195	4.04199	4.60359	4.76382	4.2342	4.66154	4.72095	1.19691	CHROMOSOME_V	11763120	11764360	-	WBGene00010075		cds
Y39E4A.2	4	0	0.675026	0.47108	0.800858	1.25046	2.13117	2.40052	1.30282	1.95172	2.24549	2.40052	CHROMOSOME_III	12952869	12966894	-	WBGene00012712	ttm-1	cds
ZK973.6	4	0	1.50854	0.858642	1.56322	1.5208	2.78321	4.06351	2.81575	3.46593	3.54943	4.06351	CHROMOSOME_I	4321096	4359106	+	WBGene00000140	anc-1	cds
T06D8.9	4	3.29443	3.65633	3.6325	3.93311	4.04628	4.21801	4.73941	4.11711	4.22111	4.48559	1.44499	CHROMOSOME_II	11239343	11240926	+	WBGene00011529		cds
T12E12.1	4	2.57934	2.95981	3.06317	3.05703	3.28488	3.62912	4.29066	3.84988	3.57772	3.92779	1.71131	CHROMOSOME_IV	5551125	5558932	+	WBGene00020462		cds
C16E9.2	4	1.75393	0	0	0	0.19006	1.87747	3.02459	2.03796	2.27555	2.62392	3.02459	CHROMOSOME_X	6935689	6938995	+	WBGene00015866		cds
ZK813.7	4	1.16618	0	0.290991	0	0	1.44794	1.94528	0.793736	1.54899	1.69921	1.94528	CHROMOSOME_X	3444789	3445382	+	WBGene00045394		cds
F46F2.2	4	0.645513	0	0	0.183506	0	2.13117	2.84412	1.30282	2.63301	2.26841	2.84412	CHROMOSOME_X	15269057	15281557	-	WBGene00002203	kin-20	cds
H03A11.1	4	0.645513	0.283709	0.217437	0.183506	0.19006	1.1126	1.27832	0.863753	1.27726	1.13609	1.09481	CHROMOSOME_X	15209222	15213190	-	WBGene00010356		cds
T23B3.2	4	0.645513	0.283709	0.217437	0.210329	0.19006	1.24792	1.28024	0.863753	1.27726	1.40414	1.21408	CHROMOSOME_I	6715875	6717091	+	WBGene00020710		cds
Y62H9A.6	4	0.748353	0	0	0	0	1.68794	2.11313	1.30282	2.27865	2.31318	2.31318	CHROMOSOME_X	11883059	11883975	+	WBGene00013394		cds
K09A9.1	4	1.0899	0	0.217437	0	0.19006	2.45275	2.26543	1.30282	2.11406	2.57042	2.57042	CHROMOSOME_X	15607901	15610563	+	WBGene00010700	nipi-3	cds
C35C5.1	4	0.748353	0.283709	0	0	0.357971	1.46594	2.40229	1.30282	0.973102	1.27633	2.40229	CHROMOSOME_X	11522647	11533384	+	WBGene00004746	sdc-2	cds
C35C5.4	4	1.0899	0	0	0	0.19006	2.16576	3.32884	1.35238	2.26622	2.31219	3.32884	CHROMOSOME_X	11548542	11550634	+	WBGene00003239	mig-2	cds
C44B7.11	4	0.748353	0	0.217437	0	0.437796	1.46594	1.9477	0.793736	1.27726	1.08537	1.9477	CHROMOSOME_II	6894114	6897487	-	WBGene00016631		cds
F11C1.5	4	0.748353	0	0	0	0	2.48932	3.02574	1.40028	1.7555	1.63011	3.02574	CHROMOSOME_X	12991377	12999569	+	WBGene00008694		cds
F14H12.4	4	0.645513	0	0.217437	0.346283	0.508361	2.2209	3.186	1.30282	1.53869	1.52155	3.186	CHROMOSOME_X	4339620	4343676	+	WBGene00017472	cst-1	cds
C01G12.1	4	0	0	0	0	0	1.9055	1.53804	0.793736	0.957729	0.980726	1.9055	CHROMOSOME_II	14573540	14576487	+	WBGene00007242	madf-5	cds
K10B3.5	4	0	0	0	0	0	1.9055	1.53804	0.863753	1.28344	0.980726	1.9055	CHROMOSOME_X	3103240	3106269	-	WBGene00019611		cds
C18C4.5	4	0	0	0	0	0	1.44794	0.963749	0.793736	0.55692	0.742567	1.44794	CHROMOSOME_V	5550299	5557265	-	WBGene00015966		cds
Y47G6A.7	4	0	0.283709	0	0	0.357971	2.73794	1.9477	1.30282	0.965436	1.40414	2.73794	CHROMOSOME_I	3502739	3508427	+	WBGene00021637		cds
Y119C1B.10	4	0	0	0.290991	0	0.19006	2.52499	1.27832	0.863753	0.957729	0.742567	2.52499	CHROMOSOME_I	4555351	4556812	-	WBGene00022475		cds
C06G3.6	4	0	1.4802	0.573373	0.183506	0.739939	2.33608	1.9477	2.27507	1.94784	2.89491	2.89491	CHROMOSOME_IV	7017615	7020191	+	WBGene00015552		cds
Y37F4.6	4	0	0.52069	0.217437	0	0.357971	1.80715	0.963749	1.35238	0.957729	1.40414	1.80715	CHROMOSOME_I	10869938	10875039	-	WBGene00021387		cds
Y38C1AA.4	4	0.748353	1.58842	1.42625	1.17848	1.31675	2.55893	1.9477	2.50079	1.94394	2.62392	1.87556	CHROMOSOME_IV	179008	183251	+	WBGene00006561	tcl-2	cds
K02D10.4	4	0	0.463942	0	0	0	1.15759	0.560897	0.793736	0.965436	1.23039	1.23039	CHROMOSOME_III	8777827	8779933	-	WBGene00019304		cds
F15D3.1	4	1.16618	1.16902	0.858642	0.664651	0.829417	2.13117	1.75667	1.71672	1.52832	2.1522	1.48755	CHROMOSOME_I	11526909	11557783	-	WBGene00001131	dys-1	cds
C51F7.1	4	1.0899	2.4164	0.406354	0.5356	1.39058	3.2301	3.39461	3.76543	3.3931	3.77864	3.37229	CHROMOSOME_V	12302465	12306953	+	WBGene00001493	frm-7	cds
F47B10.1	4	0.748353	2.31007	1.37051	0.994295	1.79565	3.50958	3.9773	3.97393	3.98208	3.76295	3.23373	CHROMOSOME_X	10897607	10900051	-	WBGene00009812	suca-1	cds
ZK792.1	4	0	0.982532	0.573373	0	0.71031	1.83656	1.9477	1.30282	1.27726	1.94278	1.9477	CHROMOSOME_IV	11659777	11665180	+	WBGene00014076		cds
C34F6.4	4	1.0899	0	0	0	0.644543	1.70319	1.53804	2.30054	1.54385	2.57042	2.57042	CHROMOSOME_X	11204044	11207026	-	WBGene00002029	hst-2	cds
Y57G11C.24	4	0.645513	0	0.406354	0	0.644543	1.28894	1.28024	2.27507	1.53351	2.12735	2.27507	CHROMOSOME_IV	14879458	14900621	+	WBGene00001330	eps-8	cds
F08C6.2	4	0.748353	0	0	0	0.508361	1.26857	0.966147	2.30054	1.74658	1.66507	2.30054	CHROMOSOME_X	7572063	7581011	+	WBGene00017241	pcyt-1	cds
M01D7.4	4	0.748353	0.283709	0.217437	0.625329	0.939435	1.51862	1.28024	2.32557	1.7555	1.66507	2.10813	CHROMOSOME_I	1845223	1850518	+	WBGene00006461	tag-96	cds
T12A2.8	4	3.87769	3.59963	3.38836	3.52435	4.0454	4.16131	4.32387	4.95765	4.45738	4.54247	1.56929	CHROMOSOME_III	6245872	6248182	-	WBGene00020442	gen-1	cds
C53D6.6	4	1.23863	0	0.217437	0	0.19006	1.4278	2.1153	2.69594	1.53869	1.82544	2.69594	CHROMOSOME_IV	9027665	9032636	-	WBGene00008283		cds
Y44A6D.3	4	1.23863	0	0	0.183506	0.580478	1.01563	1.27832	2.00735	0.973102	1.55921	2.00735	CHROMOSOME_V	20790743	20792386	-	WBGene00012854		cds
K08A2.4	4	1.80254	0.283709	0.631163	0.5356	1.04516	2.15355	2.11422	2.30054	2.12098	2.02461	2.01683	CHROMOSOME_II	2988310	2991296	+	WBGene00019513		cds
C36E6.2	4	0.748353	0	0	0	0	1.92	0.963749	1.35238	1.52832	2.28996	2.28996	CHROMOSOME_X	17452318	17455782	+	WBGene00016490		cds
R12B2.2	4	0.645513	0	0	0	0.279439	1.53754	0.560897	1.30282	1.75105	1.97099	1.97099	CHROMOSOME_III	5807007	5809162	+	WBGene00020018		cds
F43G6.8	4	0.645513	0	0	0.210329	0	0.799629	0.560897	0.793736	1.27726	0.806592	1.27726	CHROMOSOME_II	11812233	11814045	-	WBGene00009660		cds
F46F6.1	4	1.16618	0	0	0	0.19006	2.06062	2.11422	2.24914	2.84749	2.7253	2.84749	CHROMOSOME_X	10373170	10377692	-	WBGene00004375	rme-4	cds
T22C1.11	4	1.23863	0	0.406354	0.210329	0.19006	1.3906	1.28024	1.71672	2.11753	2.22325	2.22325	CHROMOSOME_I	7966912	7968682	-	WBGene00011920		cds
K08E4.2	4	1.23863	1.0962	0.996949	0.645124	1.86848	2.91556	2.1153	1.97608	2.63543	2.67473	2.27044	CHROMOSOME_IV	12055648	12056626	-	WBGene00010666		cds
K08F8.1	4	1.23863	0	0.290991	0.370268	1.94867	3.27672	2.4014	2.30054	2.64506	3.33028	3.33028	CHROMOSOME_II	8743673	8747182	+	WBGene00010681		cds
W07A12.7	4	1.23863	0	0	0	1.20556	2.4518	1.75667	1.79048	2.12786	2.37689	2.4518	CHROMOSOME_II	9161318	9163543	+	WBGene00012324	rhy-1	cds
T10C6.10	4	1.23863	0.283709	0.290991	0	1.43015	2.86686	1.53804	2.06793	2.52167	2.51486	2.86686	CHROMOSOME_V	16036393	16038323	+	WBGene00011691		cds
T22A3.3	4	3.90741	2.19527	3.02757	3.40775	4.36668	4.86777	4.71316	5.12931	4.7405	5.01928	2.93404	CHROMOSOME_I	10588166	10590455	+	WBGene00003083	lst-1	cds
Y37A1B.17	4	1.23863	0	0.217437	0.183506	1.62444	2.23146	1.75528	2.30054	1.76436	2.75805	2.75805	CHROMOSOME_IV	13964336	13979822	-	WBGene00044989		cds
B0212.3	4	0	0	0.47108	0.210329	0.801587	1.55446	0.963749	0.863753	0.973102	0.742567	1.55446	CHROMOSOME_IV	3540184	3543598	+	WBGene00015037		cds
Y49E10.20	4	1.54797	1.82884	1.95073	1.79759	2.71274	3.56159	3.02516	2.30054	3.18795	2.6755	2.01362	CHROMOSOME_III	12453487	12456751	-	WBGene00013039	scav-3	cds
Y55H10A.1	4	2.75961	2.62207	3.31356	3.11045	3.59769	4.22358	3.52024	3.35526	4.02262	3.9209	1.60151	CHROMOSOME_IV	3369192	3373464	+	WBGene00021952	vha-19	cds
F40F11.2	4	2.27742	1.95475	2.11567	2.49194	2.75902	3.25673	3.79244	2.73382	3.11311	3.05927	1.83769	CHROMOSOME_IV	11594302	11601764	+	WBGene00009587	mig-38	cds
T07D3.9	4	0	0	0	0.210329	1.34989	2.31534	3.18498	1.30282	1.94784	1.82544	3.18498	CHROMOSOME_II	898051	900937	-	WBGene00020311		cds
ZK697.2	4	0	0	0	0	0.644543	1.26857	1.94892	0.863753	1.27105	0.924125	1.94892	CHROMOSOME_V	1743771	1747927	+	WBGene00022805	nhr-256	cds
M03A1.1	4	3.17462	3.11261	3.71063	3.84111	4.2558	4.44504	4.93091	3.87983	4.68698	4.3862	1.8183	CHROMOSOME_II	4571997	4591357	+	WBGene00006868	vab-1	cds
R10E4.2	4	0	0	0.217437	0.664651	0.739939	1.60576	1.75805	0.793736	1.54385	1.13609	1.75805	CHROMOSOME_III	4276192	4280192	-	WBGene00006331	sup-26	cds
F45D11.9	4	0	0.283709	0	0.183506	1.20556	2.1973	2.11422	1.71672	2.53209	1.08537	2.53209	CHROMOSOME_II	991656	993186	+	WBGene00018455	fbxc-42	cds
Y47G6A.31	4	0	0	0.290991	0	0.644543	1.6553	1.53642	0.863753	1.75105	0.742567	1.75105	CHROMOSOME_I	3603346	3604522	+	WBGene00044436		cds
Y37E3.13	4	0	0	0	0	0.768972	1.24574	1.9477	0.793736	1.53869	0.292055	1.9477	CHROMOSOME_I	2085676	2093825	-	WBGene00021353		cds
Y41C4A.8	4	0	0	0.290991	0	0.508361	1.08957	1.53642	0.793736	1.27726	0.534825	1.53642	CHROMOSOME_III	11706869	11708720	-	WBGene00012755		cds
C39E6.1	4	0.645513	0	0.573373	0.818399	0.547346	1.60576	2.6408	2.00735	1.75105	2.12623	2.6408	CHROMOSOME_X	4738837	4749055	-	WBGene00003056	lon-2	cds
W06F12.1	4	1.75393	0.859132	1.34743	1.85281	1.54274	2.47957	3.18498	2.50079	2.27245	2.58793	2.32584	CHROMOSOME_III	13701892	13723972	+	WBGene00003048	lit-1	cds
F52B5.1	4	3.51123	2.89845	3.43534	3.26935	3.24181	3.75866	4.21859	4.13138	3.63597	4.18158	1.32015	CHROMOSOME_I	8296910	8307559	-	WBGene00009920	abts-1	cds
Y51F10.4	4	2.80523	2.40246	2.96491	2.76009	2.8619	3.37872	3.57957	3.54854	3.1896	3.51151	1.17711	CHROMOSOME_I	1932354	1945224	+	WBGene00021765		cds
F52E4.7	4	0.748353	0	0	0	0.612866	1.60406	2.64155	1.30282	0.973102	2.33408	2.64155	CHROMOSOME_X	3095427	3099827	-	WBGene00018703	sec-3	cds
T01H8.5	4	1.16618	0	0	0.210329	0.829417	2.11866	2.93901	2.03796	0.965436	2.10206	2.93901	CHROMOSOME_I	8549507	8570951	-	WBGene00001651	gon-2	cds
K04C1.2	4	0.748353	0	0	0	0.19006	1.95997	2.2664	1.75407	0.567086	2.33408	2.33408	CHROMOSOME_X	14238639	14241269	+	WBGene00010552		cds
F26F12.3	4	0.645513	0	0	0	0	0.578957	1.75805	0.863753	0.965436	1.32086	1.75805	CHROMOSOME_V	5839133	5845704	-	WBGene00017834		cds
T04C9.6	4	0.645513	0	0	0.346283	0.319239	0.708702	1.75805	0.793736	0.957729	1.52155	1.75805	CHROMOSOME_III	5976651	5982077	-	WBGene00001489	frm-2	cds
F42G9.2	4	0.748353	0	0	0.514232	0.279439	1.01563	2.64005	1.75407	1.27105	1.73108	2.64005	CHROMOSOME_III	773399	774156	+	WBGene00000882	cyn-6	cds
F55D10.2	4	2.01886	1.26938	1.37051	1.52099	1.65816	1.89225	3.32884	2.73382	2.40101	2.57042	2.05946	CHROMOSOME_X	4715147	4715772	+	WBGene00004438		cds
M142.1	4	1.23863	0	0.217437	0	0.437796	1.46407	3.52024	0.863753	2.11406	2.2222	3.52024	CHROMOSOME_III	10902549	10908831	+	WBGene00006843	unc-119	cds
T08A9.1	4	0.645513	0	0.217437	0.210329	0.644543	1.3906	3.52146	0.863753	1.28344	2.31219	3.52146	CHROMOSOME_X	7334668	7340143	+	WBGene00020334	atg-11	cds
C44B12.2	4	3.06168	0.283709	1.27677	2.30432	1.8838	2.97661	4.06295	4.08443	3.26067	4.84724	4.56353	CHROMOSOME_IV	1107396	1110860	+	WBGene00003893	ost-1	cds
C54E4.2	4	1.23863	0.283709	0	0.800858	0.80573	1.48372	2.1153	1.79048	1.53351	2.17556	2.17556	CHROMOSOME_IV	2136895	2146461	+	WBGene00016918		cds
Y102A11A.8	4	0.645513	0	0	0.183506	0	0.472435	0.963749	0.793736	0.567086	1.40414	1.40414	CHROMOSOME_X	2039416	2046340	-	WBGene00022418		cds
B0041.3	4	0	0	0	0.183506	0.508361	1.30901	1.28024	0.863753	0.567086	0.742567	1.30901	CHROMOSOME_I	4644438	4645627	+	WBGene00015008		cds
C24A1.2	4	0	0	0	0	1.24742	2.82564	2.40229	2.03796	0.973102	1.27633	2.82564	CHROMOSOME_III	688734	715818	+	WBGene00016029	elf-1	cds
F48F7.4	4	0	0	0	0	0.85672	1.85033	1.75667	0.863753	0.957729	1.08537	1.85033	CHROMOSOME_X	13965656	13969499	-	WBGene00004126	pqn-39	cds
C46H11.4	4	0	0	0	0	0.47351	1.77863	1.53965	0.863753	0.55692	1.13609	1.77863	CHROMOSOME_I	5023889	5041157	+	WBGene00002979	lfe-2	cds
F54H12.5	4	0	0	0	0.39386	0.644543	2.02338	2.2664	1.30282	0.55692	1.52155	2.2664	CHROMOSOME_III	7970181	7972037	-	WBGene00018845		cds
Y13C8A.2	4	0	0	0	0	0.85672	2.65162	2.84672	1.71672	0.567086	1.63011	2.84672	CHROMOSOME_X	16885118	16885514	+	WBGene00021189		cds
F47G3.3	4	0	0.283709	0	0	1.40914	3.06439	3.39639	2.00735	1.27726	2.74177	3.39639	CHROMOSOME_X	2375990	2379052	+	WBGene00018578		cds
Y9D1A.1	4	0	1.02238	0.631163	0.183506	1.87987	3.3644	3.57957	2.715	0.55692	2.41754	3.57957	CHROMOSOME_II	7446629	7448499	+	WBGene00021186		cds
Y9D1A.2	4	0	0.982532	0.47108	0.210329	1.97383	2.96966	3.63618	2.5226	0.965436	2.22325	3.63618	CHROMOSOME_II	7450468	7451335	-	WBGene00021187		cds
C06E8.3	4	0	0	0	0	1.04166	1.91863	2.40229	0.793736	0	1.52155	2.40229	CHROMOSOME_III	6990116	7002255	+	WBGene00004182	prk-1	cds
Y46H3C.5	4	0.748353	0.463942	0	0.210329	1.71894	3.69785	3.79345	1.71672	0.567086	2.64158	3.79345	CHROMOSOME_V	1691029	1691735	-	WBGene00021605		cds
F09C8.2	4	0	0	0	0	0.964751	3.12346	2.2664	0.863753	0.567086	1.13609	3.12346	CHROMOSOME_X	16140948	16146952	-	WBGene00008622		cds
Y20C6A.2	4	0	0	0	0	0.47351	2.03422	1.75805	0.793736	0	0.924125	2.03422	CHROMOSOME_V	17377397	17379201	+	WBGene00012492	fbxb-7	cds
Y48G1C.6	4	0	0	0	0.210329	0.319239	2.09451	1.9477	0.793736	0	0.742567	2.09451	CHROMOSOME_I	84990	86284	-	WBGene00021679		cds
C02F4.2	4	0	0	0	0	0.19006	1.3906	0.966147	0.863753	0	0.534825	1.3906	CHROMOSOME_IV	10493176	10501579	-	WBGene00006527	tax-6	cds
C33A12.7	4	0	0	0	0	0.357971	1.87888	1.75667	1.30282	0	0.924125	1.87888	CHROMOSOME_IV	9506916	9508760	-	WBGene00007886	ethe-1	cds
T26C11.9	4	0	0	0	0	0.319239	1.48372	0.966147	0.793736	0	0.292055	1.48372	CHROMOSOME_X	1852835	1853796	-	WBGene00194679		cds
Y51H7C.15	4	0.645513	0.283709	1.15008	0.370268	1.31093	3.25673	2.74743	2.69594	0.973102	1.63011	2.97302	CHROMOSOME_II	1459147	1461314	-	WBGene00044439		cds
F02H6.5	4	0	0	0.217437	0	0.146475	1.01563	1.28024	0.863753	0	0.534825	1.28024	CHROMOSOME_IV	14219875	14224415	+	WBGene00008538	sqrd-1	cds
C26H9A.2	4	0	0	0.406354	0.210329	0.19006	1.76416	1.75528	0.793736	0.567086	1.7637	1.76416	CHROMOSOME_IV	12653466	12674858	+	WBGene00007752		cds
K12H6.6	4	0	0.283709	0.217437	0.556656	0.19006	2.29535	2.6408	1.40028	0.55692	2.49557	2.6408	CHROMOSOME_II	2828603	2831238	-	WBGene00019686		cds
W02D7.5	4	0	0.72418	0.631163	0.85905	0.768972	1.87747	1.75667	1.35238	0.973102	1.99744	1.99744	CHROMOSOME_V	8297675	8299226	-	WBGene00020941		cds
B0454.1	4	0.748353	1.30212	1.40405	0.664651	1.06871	2.15239	2.1153	2.45616	1.53869	1.85602	1.79151	CHROMOSOME_II	3056644	3060251	+	WBGene00002997	lin-8	cds
T04G9.3	4	0	0.814436	0.217437	0	0.357971	2.70722	1.94528	2.99038	0.973102	1.13609	2.99038	CHROMOSOME_X	768595	770771	+	WBGene00002071	ile-2	cds
H28G03.1	4	0	0	0.217437	0	0.146475	1.94587	1.75805	2.67661	0	1.52155	2.67661	CHROMOSOME_X	5216327	5218386	+	WBGene00019249		cds
K09E3.7	4	0	0	0	0	0.47351	2.10724	0.963749	2.35017	0.55692	1.23039	2.35017	CHROMOSOME_X	17131273	17134453	-	WBGene00019578		cds
R07B7.8	4	0	0	0	0	0.19006	1.55446	0.560897	1.71672	0	0.742567	1.71672	CHROMOSOME_V	12081070	12084297	-	WBGene00011092		cds
Y116A8C.22	4	0	0	0	0	0.19006	1.13527	0.560897	1.30282	0	0.806592	1.30282	CHROMOSOME_IV	17046378	17048324	-	WBGene00013799	athp-3	cds
C16C2.2	4	0	0	0	0	0.357971	2.36715	2.26446	2.65703	1.27726	1.55921	2.65703	CHROMOSOME_I	9722541	9725602	+	WBGene00001145	eat-16	cds
T24E12.1	4	0	0	0	0.210329	0.612866	2.90241	3.1081	3.59044	1.53351	2.57042	3.59044	CHROMOSOME_II	3785555	3786679	+	WBGene00020771		cds
F13B9.1	4	0	0	0	0	0.319239	2.28525	2.52647	2.8678	1.53351	2.07632	2.8678	CHROMOSOME_X	8287209	8294463	+	WBGene00017419		cds
F59A6.1	4	0.645513	0.675026	0.406354	0.346283	0.68006	2.76878	3.10701	3.45514	2.12443	2.60604	3.10885	CHROMOSOME_II	5022756	5029974	+	WBGene00003822	nsy-1	cds
F38E9.5	4	0	0.283709	0.217437	0	0.19006	2.56903	2.52484	3.2348	1.75994	2.26841	3.2348	CHROMOSOME_X	16446125	16451264	+	WBGene00018187		cds
T01G5.7	4	0	0.463942	0	0	0	2.10843	2.26543	2.65703	0.973102	1.6977	2.65703	CHROMOSOME_V	15111950	15113786	+	WBGene00011342		cds
F53H8.4	4	0	0.463942	0.217437	0	0.644543	2.52409	2.6423	2.67661	1.27726	2.2222	2.67661	CHROMOSOME_X	944936	948882	-	WBGene00004893	sms-2	cds
M02D8.3	4	0	0	0.406354	0	0.47351	3.01507	2.52647	2.8678	1.27105	2.1511	3.01507	CHROMOSOME_X	8732968	8736963	-	WBGene00019729		cds
C37H5.13	4	0	0	0	0.39386	0.19006	2.10843	2.52647	2.50079	1.28344	2.26841	2.52647	CHROMOSOME_V	4857145	4862951	-	WBGene00016511		cds
F49E12.6	4	0	0	0	0.183506	0.19006	1.74801	1.75805	2.00735	0.567086	1.73108	2.00735	CHROMOSOME_II	8412620	8416804	+	WBGene00009899	efl-3	cds
F18H3.4	4	0	0	0	0	0.644543	1.87888	2.6423	2.54409	0.965436	2.57042	2.6423	CHROMOSOME_X	13529016	13531977	+	WBGene00008940		cds
F35H12.4	4	0	0.463942	0	0.346283	0.644543	1.86397	2.6393	2.65703	1.28344	2.12735	2.65703	CHROMOSOME_X	920193	924514	-	WBGene00018076		cds
Y51A2D.17	4	0	0	0	0.514232	0.801587	2.41425	2.93839	3.11776	1.7555	2.17556	3.11776	CHROMOSOME_V	18616571	18620213	+	WBGene00003660	nhr-70	cds
ZC416.2	4	0	0.463942	0	0.210329	0.508361	1.57119	1.9477	2.65703	0.965436	1.52155	2.65703	CHROMOSOME_IV	3633612	3635463	+	WBGene00022609		cds
F10D7.2	4	0	0	0.406354	0.370268	0.279439	1.40932	2.40317	2.69594	0.957729	1.23039	2.69594	CHROMOSOME_X	17364572	17368570	-	WBGene00017339		cds
F34H10.3	4	0	0	0	0.346283	0	2.38617	2.52647	2.69594	0.567086	1.36215	2.69594	CHROMOSOME_X	9633240	9635590	-	WBGene00009380		cds
F35D11.3	4	0	0	0.290991	0.210329	0.357971	1.53754	1.75667	1.71672	0.55692	0.924125	1.75667	CHROMOSOME_II	4608367	4612050	+	WBGene00018044		cds
F35H12.5	4	0	0	0	0.210329	0.47351	1.99757	2.52647	2.30054	0.567086	1.52155	2.52647	CHROMOSOME_X	918351	920199	+	WBGene00018077		cds
F20C5.6	4	0	0	0	0.556656	0.19006	1.48372	1.28024	1.71672	0.567086	1.23039	1.71672	CHROMOSOME_IV	8771698	8773182	-	WBGene00008971		cds
C34F11.3	4	0.645513	0.463942	0	0	0.85672	2.84855	2.6408	2.61704	1.27726	2.92407	2.92407	CHROMOSOME_II	5203303	5209786	+	WBGene00016415		cds
T04F8.6	4	0	0	0	0	0.19006	1.6219	1.27832	1.75407	0.55692	1.94278	1.94278	CHROMOSOME_X	11667092	11672203	+	WBGene00011444		cds
Y60A3A.1	4	0	0.463942	0.290991	0	0.357971	2.06062	1.75528	2.30054	0.567086	2.35564	2.35564	CHROMOSOME_V	19995956	20004456	-	WBGene00006786	unc-51	cds
K01G12.3	4	0	0	0	0.183506	0.768972	2.2943	1.53804	1.75407	0.567086	1.52155	2.2943	CHROMOSOME_IV	14193473	14196137	+	WBGene00010483		cds
M88.6	4	0	0.675026	0.290991	0.783101	1.33341	3.01989	2.40229	2.27507	0.965436	2.90956	3.01989	CHROMOSOME_III	4562706	4566248	+	WBGene00003915	pan-1	cds
R03G5.2	4	0	0	0	0.210329	0.437796	1.71671	1.53804	1.30282	0.55692	1.52155	1.71671	CHROMOSOME_X	7816669	7820688	+	WBGene00004758	sek-1	cds
C39B5.2	4	0	0	0	0	0	1.1599	0.560897	0.793736	0	1.23039	1.23039	CHROMOSOME_III	2233878	2236976	+	WBGene00016520		cds
F35E12.3	4	0	0	0	0	0.19006	1.71671	0.560897	1.35238	0	1.40414	1.71671	CHROMOSOME_V	13725892	13727001	+	WBGene00009427	fbxa-181	cds
R05D7.7	4	0	0.283709	0	0	0.146475	1.26857	0.560897	1.30282	0	1.08537	1.30282	CHROMOSOME_I	12189512	12190193	-	WBGene00077559		cds
T21B4.17	4	0	0	0	0	0.357971	1.71828	0.966147	0.793736	0	1.27633	1.71828	CHROMOSOME_II	12520148	12524414	+	WBGene00044032	ceh-99	cds
Y73F8A.13	4	0	0	0	0	0.644543	1.73322	0.963749	0.863753	0	1.7637	1.7637	CHROMOSOME_IV	15312273	15314386	+	WBGene00013522		cds
B0207.4	4	3.438	3.5129	3.87974	3.70411	4.14144	3.88722	4.73941	4.34862	4.4275	4.77342	1.33542	CHROMOSOME_I	5937479	5938887	+	WBGene00000099	air-2	cds
C14B9.1	4	0	0	0.874292	0.625329	0.71031	1.28894	2.93839	2.0973	2.11059	2.65902	2.93839	CHROMOSOME_III	8138024	8139565	+	WBGene00002011		cds
C42D8.8	4	0.645513	0	0.858642	0.683918	0.80573	0.799629	2.11638	2.45616	2.52689	2.7253	2.7253	CHROMOSOME_X	5112403	5116839	-	WBGene00000149	apl-1	cds
F42H10.3	4	0	0	0.406354	0.370268	0	0.189748	1.53804	1.35238	1.27105	1.48288	1.53804	CHROMOSOME_III	8484081	8488284	+	WBGene00018367		cds
F52A8.2	4	0	0	0.573373	0.183506	0.146475	0.189748	0.966147	0.863753	0.965436	1.13609	1.13609	CHROMOSOME_I	7318297	7321090	-	WBGene00001680	gpb-2	cds
B0252.3	4	0	0	0	0	0	0.189748	1.75805	0.793736	0.965436	1.44495	1.75805	CHROMOSOME_II	6902826	6907713	-	WBGene00015088		cds
K07E3.3	4	0	0	0	0.210329	0.146475	0.643634	2.2664	0.793736	1.53351	2.29096	2.29096	CHROMOSOME_X	8084159	8086501	-	WBGene00000929	dao-3	cds
F54E4.1	4	0	0	0	0.183506	0.508361	1.38862	2.84607	1.35238	2.40385	2.51486	2.84607	CHROMOSOME_X	14611335	14624788	+	WBGene00004313	rbc-1	cds
T11G6.2	4	0.748353	0	0	0.183506	0.357971	1.48372	3.10647	1.35238	2.27555	2.67626	3.10647	CHROMOSOME_IV	10855476	10858538	-	WBGene00011717		cds
B0303.14	4	0	0	0	0	0	0	2.11422	1.71672	1.94784	2.07632	2.11422	CHROMOSOME_III	8713908	8716103	-	WBGene00015132		cds
C29F7.5	4	0	0	0	0	0	0.318328	1.94649	1.35238	1.94394	1.85602	1.94649	CHROMOSOME_X	13427041	13428781	-	WBGene00001436	fkh-4	cds
Y37E11AR.6	4	0	0	0	0	0	0.472435	1.94649	1.30282	1.7555	1.79419	1.94649	CHROMOSOME_IV	3761187	3766821	-	WBGene00006869	vab-2	cds
C18E3.3	4	0	0	0	0	0	0.911667	2.11638	1.35238	1.94394	2.10206	2.11638	CHROMOSOME_I	4203460	4208521	+	WBGene00015972		cds
F55F3.1	4	0	0.283709	0	0	0.19006	0.855307	1.75667	1.30282	1.75105	1.97099	1.97099	CHROMOSOME_X	13755701	13759323	+	WBGene00010115	aakb-1	cds
F17A2.5	4	0	0	0	0	0	0.611658	1.53804	1.35238	1.27726	1.85602	1.85602	CHROMOSOME_X	12318091	12320632	-	WBGene00000461	ceh-40	cds
K04C1.3	4	0	0	0	0	0	0.472435	1.53804	1.30282	1.27105	1.52155	1.53804	CHROMOSOME_X	14241500	14243328	-	WBGene00010553		cds
F54A5.1	4	0	0	0	0	0	0.799629	1.94892	1.75407	2.11753	2.31219	2.31219	CHROMOSOME_I	989674	992166	+	WBGene00018786	hmbx-1	cds
R04A9.4	4	0	0	0	0.183506	0.801587	1.4278	2.84542	2.65703	2.74311	3.11033	3.11033	CHROMOSOME_X	381382	382710	-	WBGene00002060	ife-2	cds
ZK822.5	4	0	0	0	0.183506	0.437796	0.827736	1.53804	1.75407	1.7555	2.22325	2.22325	CHROMOSOME_IV	11937380	11940632	+	WBGene00014092		cds
T13C5.5	4	0.645513	0	0	0.346283	0.71031	1.71828	2.52565	2.69594	2.75205	3.82575	3.82575	CHROMOSOME_X	6201873	6204711	-	WBGene00000245	bca-1	cds
T03G6.3	4	0	0	0	0	0.19006	0.611658	1.28024	1.30282	1.76436	2.39689	2.39689	CHROMOSOME_X	2610817	2615719	-	WBGene00020195		cds
T14G11.3	4	0	0	0.406354	0.183506	0.989631	1.26857	3.25845	2.67661	3.58274	3.73104	3.73104	CHROMOSOME_X	2682818	2687176	-	WBGene00020511	immt-1	cds
Y44A6C.1	4	0	0	0	0	0.19006	0.578957	1.27832	0.863753	1.52832	1.63011	1.63011	CHROMOSOME_V	20713889	20716844	+	WBGene00012850		cds
F56D5.5	4	0	0.283709	0	0	0	0.472435	1.53642	0.863753	2.25997	1.96974	2.25997	CHROMOSOME_IV	9407199	9408087	-	WBGene00010149		cds
Y47D7A.8	4	0	0	0.406354	0.210329	0.146475	0.472435	2.26348	1.71672	3.18795	3.26443	3.26443	CHROMOSOME_V	4420981	4422063	-	WBGene00004820	skr-14	cds
B0464.3	4	3.81983	3.52682	3.97222	3.98716	3.96197	4.21773	4.95321	4.38186	4.86388	5.28641	1.75959	CHROMOSOME_III	9488534	9489102	+	WBGene00007185	nlp-36	cds
K01A2.5	4	0	0	0.406354	1.00965	0.744262	0.911667	2.1153	1.35238	1.76436	2.57124	2.57124	CHROMOSOME_II	302405	303650	+	WBGene00019280		cds
C14F11.2	4	0	0	0.47108	0.556656	0.319239	0.708702	1.28024	0.793736	1.52832	1.52155	1.52832	CHROMOSOME_X	6208731	6213876	-	WBGene00015779		cds
K08E5.2	4	0	0	0	0.941407	0.547346	0.990982	1.94528	0.793736	2.26934	2.31318	2.31318	CHROMOSOME_III	10152704	10157829	+	WBGene00003519	nac-3	cds
F27D9.1	4	0.645513	0	0	0	0	0.189748	0.966147	0.863753	1.75994	1.94278	1.94278	CHROMOSOME_X	7682367	7685632	+	WBGene00006757	unc-18	cds
R11.1	4	0.748353	0	0	0.183506	0.19006	0.611658	1.53804	1.30282	1.53869	2.05129	2.05129	CHROMOSOME_X	16189792	16194933	+	WBGene00011226		cds
ZK792.3	4	1.42915	0.859132	0.573373	0.85905	0.829417	1.1599	2.74673	2.5226	3.19452	3.464	2.89063	CHROMOSOME_IV	11676329	11678473	+	WBGene00002131	inx-9	cds
F49E2.1	4	0.645513	0	0.217437	0.5356	0.146475	0.189748	1.53642	0.863753	1.53351	2.29096	2.29096	CHROMOSOME_X	9561788	9565924	-	WBGene00009885		cds
C05D10.1	4	0	0.463942	0	0	0	0.73862	2.11313	2.32557	1.75994	2.70939	2.70939	CHROMOSOME_III	6080512	6084686	+	WBGene00015477	attf-4	cds
F20D1.10	4	0	0.463942	0.217437	0	0	0.357416	1.27832	1.71672	1.53869	1.7637	1.7637	CHROMOSOME_X	14979304	14980365	+	WBGene00008980	tag-299	cds
F14B8.2	4	0	0	0	0	0.357971	0.472435	1.53804	2.00735	1.53869	2.02461	2.02461	CHROMOSOME_X	6904696	6905798	+	WBGene00017445		cds
F42C5.9	4	0	0.283709	0.406354	0.183506	0.47351	0.318328	1.53642	1.71672	1.54385	1.88596	1.88596	CHROMOSOME_IV	7314361	7317152	-	WBGene00018349		cds
F32B5.1	4	0	0.283709	0.290991	0.645124	0.801587	0.708702	1.9477	2.24914	2.11059	2.88077	2.88077	CHROMOSOME_I	2700422	2702084	+	WBGene00017975		cds
W10C8.5	4	0	0.675026	0.47108	0.994295	1.16244	0.827736	2.1153	3.24795	2.63784	3.49304	3.49304	CHROMOSOME_I	2853972	2855736	-	WBGene00021128		cds
H14N18.3	4	0	0.463942	0.47108	0.664651	1.18734	1.44605	2.74534	4.18371	3.33139	3.41395	4.18371	CHROMOSOME_V	8923066	8923888	+	WBGene00019203	ttr-47	cds
C14F5.1	4	0.645513	0	0.406354	0.210329	0.19006	1.71828	2.2664	2.8678	2.64265	3.33028	3.33028	CHROMOSOME_X	7954307	7956143	+	WBGene00015776	dct-1	cds
F20D1.9	4	0	0	0	0.210329	0	1.1599	1.28024	2.06793	1.75994	2.17556	2.17556	CHROMOSOME_X	15002016	15003878	-	WBGene00008979		cds
W05H7.1	4	0	0	0	0	0	1.26857	1.27832	2.0973	1.53869	2.41754	2.41754	CHROMOSOME_X	1450763	1452641	+	WBGene00021044		cds
ZC84.3	4	0	0	0.217437	0.210329	0	1.30901	1.75805	2.85066	1.7555	2.4769	2.85066	CHROMOSOME_III	9186478	9191031	-	WBGene00013847	cls-3	cds
F13H6.3	4	0	0	0	0	0.146475	0.578957	0.966147	1.75407	1.76436	1.97099	1.97099	CHROMOSOME_V	6363390	6365656	-	WBGene00017431		cds
W05H7.3	4	0	0	0	0	0.19006	1.20346	2.11422	3.52712	3.03417	3.08532	3.52712	CHROMOSOME_X	1439271	1440258	-	WBGene00021046	sedl-1	cds
Y62H9A.4	4	0	0	0	0	0	0.578957	1.27832	1.67837	1.54899	1.69921	1.69921	CHROMOSOME_X	11880056	11881196	+	WBGene00013392		cds
T22E5.5	4	1.16618	0	0.406354	1.10371	0.860708	1.92	3.02459	4.33019	4.51535	5.03986	5.03986	CHROMOSOME_X	6408427	6410322	-	WBGene00003495	mup-2	cds
C09B8.5	4	0	0	0	0	0	0.189748	0.966147	2.22274	0.965436	1.73108	2.22274	CHROMOSOME_X	6020831	6022458	-	WBGene00015624		cds
K12F2.1	4	0	0	0	0	0	0	0.966147	1.35238	0.567086	1.55921	1.55921	CHROMOSOME_V	12226797	12234324	-	WBGene00003515	myo-3	cds
F08C6.4	4	0	0	0.775244	0.210329	0.47351	0.799629	1.53642	3.14614	1.94394	3.52108	3.52108	CHROMOSOME_X	7562790	7564765	+	WBGene00006063	sto-1	cds
H17B01.1	4	0.645513	0.52069	1.02631	0.370268	1.02123	1.46407	1.53642	3.62623	2.64025	3.77099	3.40073	CHROMOSOME_II	1504573	1509837	+	WBGene00019207	fgt-1	cds
T07C4.5	4	0	0	0.406354	0.183506	0.146475	0.578957	0.963749	1.35238	0.973102	1.7956	1.7956	CHROMOSOME_III	10337746	10339341	+	WBGene00011561	ttr-15	cds
C07E3.9	4	0	0.283709	0.217437	0.210329	0.146475	0.827736	1.94649	2.65703	3.69312	2.77415	3.69312	CHROMOSOME_II	10350700	10351557	+	WBGene00007419		cds
C30G4.7	4	0	0	0	0	0	0	1.53804	1.71672	1.94004	1.66507	1.94004	CHROMOSOME_X	17056853	17058462	-	WBGene00016272		cds
C36E6.5	4	0	0.52069	0.686727	0.70293	0.993268	0.318328	2.64155	3.40307	3.84482	4.41729	4.41729	CHROMOSOME_X	17455705	17456520	-	WBGene00003370	mlc-2	cds
C46F4.1	4	0	0	0.217437	0.370268	0.357971	0.507611	1.53804	2.06793	2.52428	2.55269	2.55269	CHROMOSOME_X	5931087	5934649	+	WBGene00001175	egl-6	cds
T27A8.1	4	0	0.283709	0	0.183506	0.279439	0	0.966147	1.67837	2.26934	1.97099	2.26934	CHROMOSOME_X	16049801	16054569	+	WBGene00012073		cds
F01F1.6	4	3.91002	4.15544	3.70408	4.32939	4.38755	4.33754	5.19786	5.51689	5.76996	5.72295	2.06588	CHROMOSOME_III	5855994	5859141	+	WBGene00000115	alh-9	cds
F08G12.1	4	0	0	0	0.39386	0.19006	0.911667	0.560897	1.75407	1.94394	1.82544	1.94394	CHROMOSOME_X	11302010	11305811	-	WBGene00008585		cds
Y105E8B.1	4	0	0.283709	0.573373	0.909026	0.964751	1.20346	0.963749	2.8678	2.937	2.9661	2.9661	CHROMOSOME_I	14620748	14631243	-	WBGene00002978	lev-11	cds
T12D8.4	4	0	0	0	0.346283	0	0.357416	0.560897	1.35238	1.75994	1.88596	1.88596	CHROMOSOME_III	13626893	13630707	-	WBGene00011732	arrd-17	cds
T14G12.3	4	0	0	0	0.210329	0.19006	0.611658	0.560897	1.35238	1.7555	1.97099	1.97099	CHROMOSOME_X	3731905	3733443	-	WBGene00006408	tag-18	cds
F09F7.2	4	0	0.283709	0.406354	0.765123	0.801587	1.08957	1.75528	2.03796	2.52949	2.74177	2.74177	CHROMOSOME_III	5564985	5567344	+	WBGene00003371	mlc-3	cds
H06O01.3	4	0	0.814436	0.825618	1.28786	1.16567	1.73322	2.11422	2.88474	3.10615	3.31984	3.31984	CHROMOSOME_I	7005442	7009174	+	WBGene00010370	ctg-1	cds
R02D3.1	4	0	0.283709	0.47108	1.08933	0.513436	1.01563	1.53965	2.32557	2.64985	2.41754	2.64985	CHROMOSOME_IV	245121	251924	+	WBGene00019819		cds
T01E8.3	4	0	0	0	0.556656	0	0.357416	0.963749	1.35238	1.95946	1.85602	1.95946	CHROMOSOME_II	10222818	10229376	+	WBGene00004038	plc-3	cds
ZK721.2	4	0	0.463942	0.217437	1.192	0.612866	0.578957	1.28024	2.50079	1.9556	3.27578	3.27578	CHROMOSOME_X	8789401	8790568	+	WBGene00006764	unc-27	cds
ZK930.2	4	0	0.463942	0	1.23182	0.279439	0.507611	1.28024	2.27507	2.2631	2.67626	2.67626	CHROMOSOME_II	11890928	11893389	-	WBGene00014152		cds
C44C1.1	4	0	1.02238	0.906233	0.210329	0.401176	0.507611	1.28024	2.32557	1.54385	2.82072	2.82072	CHROMOSOME_X	980773	983026	+	WBGene00016641		cds
T01B6.3	4	0	0.52069	0.723047	0.210329	0.19006	0.643634	0.966147	2.03796	1.7555	2.4769	2.4769	CHROMOSOME_X	2314910	2319325	-	WBGene00020135	aakg-4	cds
C47D12.5	4	0	0.902484	0.906233	0	0.319239	0.357416	0.560897	2.54409	2.40669	3.97762	3.97762	CHROMOSOME_II	11683415	11685225	-	WBGene00008139		cds
F11C3.3	4	0	0.72418	0.631163	0	0.829417	0.472435	1.27832	2.56526	2.52167	2.69254	2.69254	CHROMOSOME_I	14855888	14863529	-	WBGene00006789	unc-54	cds
F28H1.1	4	0	0.283709	0.723047	0	0.401176	0.189748	1.28024	2.5226	2.11059	2.10206	2.5226	CHROMOSOME_I	3995712	3996966	+	WBGene00017908		cds
B0507.2	4	0	0	0	0	0.319239	0.827736	2.11422	1.71672	0.55692	2.17556	2.17556	CHROMOSOME_V	8774310	8776494	+	WBGene00015219		cds
Y34B4A.11	4	0	0	0	0	0.19006	0.937693	1.53804	1.35238	0.55692	1.94278	1.94278	CHROMOSOME_X	5283163	5283687	+	WBGene00045435		cds
T20B12.6	4	0	0	0	0	0	1.13527	1.9477	1.30282	0.567086	1.914	1.9477	CHROMOSOME_III	7370066	7374660	-	WBGene00003378	mml-1	cds
R05D3.9	4	0	0.283709	0.406354	0.210329	0.68006	0.963258	2.26543	1.67837	0.973102	2.60684	2.60684	CHROMOSOME_III	8362337	8368763	-	WBGene00019882		cds
F15B10.3	4	0	0	0	0.370268	0	0.708702	0.963749	0.863753	0.567086	1.23039	1.23039	CHROMOSOME_IV	6602669	6603966	+	WBGene00017481		cds
F58G6.5	4	0	0	0	0.370268	0	1.50127	2.1153	1.71672	0.957729	3.03334	3.03334	CHROMOSOME_IV	9664345	9675655	-	WBGene00003627	nhr-34	cds
ZK673.10	4	0	0	0	0	0	0.578957	0.966147	0.793736	0.55692	1.36215	1.36215	CHROMOSOME_II	10464738	10465238	+	WBGene00014064	sdz-37	cds
R186.6	4	0	0	0	0.370268	0.319239	0.578957	1.53965	0.863753	0.567086	1.7956	1.7956	CHROMOSOME_V	12955188	12961133	-	WBGene00011307	mpst-7	cds
Y49E10.19	4	5.20358	5.4174	5.30219	5.46734	5.71523	5.82622	6.07959	5.91684	5.72786	6.27361	1.07002	CHROMOSOME_III	12446255	12453103	-	WBGene00013038	ani-1	cds
C38C6.2	4	1.23863	0.72418	0.775244	0.492542	0.19006	2.00989	2.1153	2.30054	1.54385	3.1224	2.93234	CHROMOSOME_II	14640021	14644010	-	WBGene00000225	atgp-2	cds
Y73E7A.7	4	1.70362	1.58842	1.65728	1.70288	1.31385	2.23146	2.4014	2.45616	2.12098	2.65902	1.34518	CHROMOSOME_I	1621353	1626607	-	WBGene00000269	bre-4	cds
T27C10.6	4	0.748353	0	0.686727	0.183506	0	1.33087	2.26543	2.00735	1.76436	2.58874	2.58874	CHROMOSOME_I	10879759	10894230	-	WBGene00003068	lrk-1	cds
F10E9.6	4	0	0	0	0	0.47351	0.189748	0.963749	1.30282	0.973102	2.37594	2.37594	CHROMOSOME_III	8279037	8305761	+	WBGene00003243	mig-10	cds
T27F7.2	4	0	0	0	0	0.279439	0.357416	0.966147	1.35238	0.973102	2.10206	2.10206	CHROMOSOME_II	4969196	4988932	+	WBGene00020867	shc-2	cds
F15A4.2	4	0	0	0	0	0	0.318328	0.963749	0.793736	0.55692	1.7637	1.7637	CHROMOSOME_II	12462465	12464018	+	WBGene00008838		cds
F55F3.3	4	0	0	0	0	0.146475	0	0.966147	0.793736	0.55692	2.24652	2.24652	CHROMOSOME_X	13765285	13770494	-	WBGene00010117	nkb-3	cds
ZC64.2	4	0	0	0	0	0	0	1.53642	0.863753	0.55692	1.99866	1.99866	CHROMOSOME_X	3840847	3842449	-	WBGene00022515	ttr-48	cds
Y4C6B.7	4	0	0.463942	0	0	0.19006	0.578957	0.963749	0.793736	0.55692	2.22325	2.22325	CHROMOSOME_IV	5351419	5353410	-	WBGene00021161		cds
C25B8.4	4	0	0.675026	1.56169	0.183506	0.580478	0.767929	1.94649	1.75407	2.25997	2.33311	2.33311	CHROMOSOME_X	6617404	6622855	-	WBGene00016088	clec-266	cds
F40F4.3	4	0	0	1.301	0.210329	0.19006	0.318328	1.27832	0.863753	1.28959	1.27633	1.301	CHROMOSOME_X	3259090	3259843	+	WBGene00002253	lbp-1	cds
C32D5.9	4	3.4533	4.09268	4.56212	4.35695	4.31695	4.64293	4.93137	4.95561	5.06225	5.6381	2.1848	CHROMOSOME_II	6346925	6347689	-	WBGene00002980	lgg-1	cds
T12A2.2	4	3.52578	4.0218	4.5557	4.32592	4.23293	4.3307	4.65973	5.07862	4.71485	5.4034	1.87762	CHROMOSOME_III	6248265	6251555	+	WBGene00020437		cds
ZK863.7	4	3.06168	3.5134	4.34112	3.65014	4.00191	3.87345	4.39187	4.4993	4.45328	4.83509	1.77341	CHROMOSOME_V	12192256	12194426	+	WBGene00004384	rnp-1	cds
C36B1.1	4	0.645513	2.10806	2.57509	1.52099	1.62444	2.38519	2.4014	3.24795	3.39881	4.56599	3.92048	CHROMOSOME_I	8705681	8724273	-	WBGene00000527	cle-1	cds
T04G9.7	4	3.04395	4.94966	4.68769	3.70774	3.99659	4.78889	5.57419	5.84497	6.20447	7.17615	4.1322	CHROMOSOME_X	770834	771968	+	WBGene00020218		cds
W03F8.1	4	0	1.53633	1.78178	1.21867	1.33341	2.50681	3.39461	3.85426	4.29528	5.04966	5.04966	CHROMOSOME_IV	5204583	5207130	+	WBGene00006586	tni-4	cds
F13B12.6	4	2.05943	2.60904	2.95758	2.58385	2.30271	2.53355	2.74673	3.16012	3.3931	3.43346	1.37403	CHROMOSOME_IV	10414052	10417868	-	WBGene00008733		cds
C35E7.5	4	0	0.52069	2.13577	1.11794	1.01766	2.87644	3.32744	3.53787	3.68963	3.62081	3.68963	CHROMOSOME_I	10823347	10828443	+	WBGene00016457		cds
Y47H9C.5	4	0	0.52069	1.10999	0.664651	0.644543	1.58944	2.2664	1.67837	1.75994	1.73108	2.2664	CHROMOSOME_I	11877794	11887272	+	WBGene00001045	dnj-27	cds
F58B3.9	4	0	0.72418	1.76509	0.645124	1.04166	1.99887	3.6892	3.16012	2.53209	3.20681	3.6892	CHROMOSOME_IV	11640122	11640992	-	WBGene00010234	ttr-50	cds
T19D12.6	4	0	0.283709	0.906233	0.210329	0.773209	1.35038	2.26543	2.69594	1.75994	2.35564	2.69594	CHROMOSOME_II	6637040	6643085	-	WBGene00020581		cds
F26E4.1	4	3.91978	4.25732	4.73399	4.44261	4.39023	4.79892	5.19799	5.25851	4.6645	4.99278	1.33873	CHROMOSOME_I	9754111	9757889	+	WBGene00006352	sur-6	cds
M163.1	4	0	0	0.573373	0	0	0.937693	1.28024	1.40028	1.27726	1.63011	1.63011	CHROMOSOME_X	14502428	14503843	-	WBGene00010935		cds
T13F2.8	4	0.645513	1.13307	2.00309	0.5356	0.71031	2.07242	2.84477	3.44375	3.10615	3.5392	3.0036	CHROMOSOME_IV	9772490	9773454	+	WBGene00000301	cav-1	cds
T09B4.5	4	1.16618	1.42397	1.76509	0.346283	0.739939	2.10724	2.93778	3.37936	3.1863	3.28655	3.03308	CHROMOSOME_I	6154077	6157402	+	WBGene00020379		cds
C04A11.2	4	0	0	0.217437	0	0	0.643634	1.27832	0.793736	1.74658	0.742567	1.74658	CHROMOSOME_X	13665887	13668742	-	WBGene00007286		cds
C25D7.3	4	0	0	0.217437	0	0	0.357416	1.28024	0.863753	1.27726	0.534825	1.28024	CHROMOSOME_V	15039340	15048192	-	WBGene00004747	sdc-3	cds
F55B11.3	4	0	0.463942	0	0	0	0.799629	1.75528	1.30282	1.95946	0.806592	1.95946	CHROMOSOME_IV	14424666	14425898	+	WBGene00010085		cds
F55B11.5	4	0	0.463942	0	0	0	0.799629	1.75528	0.793736	1.76877	0.806592	1.76877	CHROMOSOME_IV	14427668	14428404	+	WBGene00010087		cds
Y54E10A.16	4	0	0	0	0.625329	0	0.708702	2.11638	1.30282	1.7555	0.806592	2.11638	CHROMOSOME_I	3244152	3246166	-	WBGene00021834	mab-31	cds
C09B8.6	4	0.645513	0	0	0	0.401176	0.318328	2.1153	1.35238	1.54385	1.13609	2.1153	CHROMOSOME_X	6034057	6039461	-	WBGene00002023	hsp-25	cds
W02D9.7	4	0	0	0	0	0	0.318328	2.26348	1.30282	1.28959	0.806592	2.26348	CHROMOSOME_I	12559265	12559662	-	WBGene00012213		cds
Y77E11A.2	4	0	0	0	0	0.319239	0.472435	1.27832	0.863753	0.957729	0.534825	1.27832	CHROMOSOME_IV	1457074	1459524	+	WBGene00022307		cds
C25F6.1	4	0	0	0	0.39386	0.547346	1.1126	2.6423	1.71672	2.63543	2.2222	2.6423	CHROMOSOME_X	5486464	5488067	+	WBGene00016102		cds
T11G6.4	4	0	0	0	0.210329	0.19006	0.472435	1.28024	0.793736	1.28959	0.924125	1.28959	CHROMOSOME_IV	10849728	10851912	-	WBGene00011719		cds
W09C3.7	4	0	0	0.217437	0.783101	0.773209	1.22475	3.79379	2.06793	3.01758	2.37689	3.79379	CHROMOSOME_I	4714321	4715486	-	WBGene00021114		cds
T08H4.1	4	0	0	0	0	0.71031	0.472435	2.40317	1.35238	1.75994	1.52155	2.40317	CHROMOSOME_II	4120340	4127852	+	WBGene00006476	rhgf-2	cds
K08B4.6	4	0	0	0.217437	0.210329	0.19006	0.189748	1.75667	0.793736	1.54385	1.32086	1.75667	CHROMOSOME_IV	6092587	6093636	-	WBGene00000535	cpi-1	cds
K11D12.7	4	0	0	0	0	0.146475	0	1.27832	0.863753	1.28959	0.806592	1.28959	CHROMOSOME_V	5035237	5036451	-	WBGene00019647		cds
ZK1127.10	4	0.748353	0.283709	0.217437	1.3418	1.21181	0.611658	3.58035	1.71672	2.83702	2.02461	3.36292	CHROMOSOME_II	7056130	7057972	-	WBGene00022856	cth-2	cds
F11A3.2	4	3.15603	3.14907	3.57218	3.76665	3.34127	3.75096	3.88719	3.85848	4.42541	3.96971	1.27634	CHROMOSOME_V	9513830	9517550	+	WBGene00008670		cds
F35E12.10	4	0	0	0.217437	0.5356	0.319239	0.990982	1.53965	1.40028	2.11753	0.924125	2.11753	CHROMOSOME_V	13745690	13748774	-	WBGene00009434		cds
F47G9.1	4	3.37699	3.13029	3.38269	3.47416	3.41929	3.65845	4.02076	4.07708	4.42959	3.91365	1.2993	CHROMOSOME_V	11323944	11326948	-	WBGene00009829		cds
ZK525.2	4	0	0	0.406354	0.370268	0.739939	1.1126	1.94649	1.67837	2.74982	1.69921	2.74982	CHROMOSOME_III	13673177	13674644	+	WBGene00000179	aqp-11	cds
F42D1.3	4	0	0	0	0.183506	0.19006	0.189748	0.560897	0.863753	1.28959	0.806592	1.28959	CHROMOSOME_X	14800051	14804288	+	WBGene00009629	sprr-2	cds
R05F9.12	4	0	0	0	0.346283	0.357971	0.318328	0.966147	1.35238	2.11406	0.924125	2.11406	CHROMOSOME_II	4914489	4925242	-	WBGene00019895	aagr-2	cds
Y73F8A.6	4	0	0	0	0.765123	0.993268	0.855307	1.9477	1.75407	3.0305	2.22325	3.0305	CHROMOSOME_IV	15270126	15275775	-	WBGene00000370	ccg-1	cds
F35H10.10	4	0	0	0.217437	0.370268	0	0.357416	0.966147	0.793736	1.53869	0.742567	1.53869	CHROMOSOME_IV	8307313	8312933	-	WBGene00018073		cds
T07C12.9	4	0	0	0	0	0	0.189748	0.966147	0.863753	1.53869	0.806592	1.53869	CHROMOSOME_V	9956856	9958307	-	WBGene00011573		cds
T23G4.1	4	0	0	0.406354	0	0	0	1.94528	1.35238	2.93896	1.23039	2.93896	CHROMOSOME_IV	13701216	13704003	-	WBGene00006580	tlp-1	cds
Y46B2A.1	4	0	0	0.217437	0.370268	0	0	0.966147	0.863753	1.27726	0.924125	1.27726	CHROMOSOME_II	868821	871707	+	WBGene00021576	fbxc-51	cds
K02B7.3	4	0	0.675026	0	0.892559	0.279439	1.24792	2.11422	2.00735	2.25997	1.85602	2.25997	CHROMOSOME_II	14694162	14695224	-	WBGene00010491		cds
T16G12.6	4	3.36085	3.75843	3.10812	3.74534	3.7451	3.71676	4.45489	4.65326	4.51993	4.22804	1.54514	CHROMOSOME_III	10069472	10075949	+	WBGene00011807		cds
ZK353.6	4	3.97384	4.36775	3.78284	4.36687	4.37711	4.39204	4.93153	4.71853	4.95774	4.84275	1.1749	CHROMOSOME_III	8399124	8401860	-	WBGene00002249	lap-1	cds
Y39A1A.24	4	2.05943	2.83355	1.91221	2.6111	3.44717	2.83404	3.52024	3.61612	3.69428	3.35142	1.78207	CHROMOSOME_III	10613468	10614830	+	WBGene00012660		cds
Y73B3A.12	4	0.748353	1.16902	0	1.03987	1.06871	1.46594	1.27832	2.03796	1.95172	1.32086	2.03796	CHROMOSOME_X	139167	139640	+	WBGene00022214		cds
B0334.8	4	2.40512	2.22972	2.83168	3.29265	3.23586	2.83951	3.25845	3.62623	3.26224	3.70646	1.47674	CHROMOSOME_II	11519435	11526998	-	WBGene00000090	age-1	cds
C33H5.11	4	2.73478	2.05281	2.89997	3.18612	3.38758	3.16811	3.45879	3.87983	3.62749	3.98363	1.93082	CHROMOSOME_IV	7785962	7789496	-	WBGene00016378	imp-3	cds
T05D4.1	4	0	0	0.217437	0.909026	0.580478	0.799629	0.560897	1.79048	1.27726	1.7956	1.7956	CHROMOSOME_III	13563240	13564889	-	WBGene00011474	aldo-1	cds
ZK669.4	4	3.64896	3.52631	3.98709	4.43462	4.42425	4.42812	4.4246	5.08596	4.83615	5.0753	1.55965	CHROMOSOME_II	7942551	7945157	-	WBGene00014054		cds
C56G7.1	4	5.41352	5.03767	5.11007	5.36286	5.52177	5.34139	5.4385	6.12203	5.82512	5.82698	1.08436	CHROMOSOME_III	3392002	3393783	-	WBGene00003372	mlc-4	cds
F45E1.6	4	0.645513	0	0.217437	0.783101	0.801587	0.73862	0.963749	1.75407	1.28959	1.82544	1.82544	CHROMOSOME_X	7981333	7982027	-	WBGene00001945	his-71	cds
F13D12.7	4	1.0899	0.72418	0.825618	1.13204	1.57598	1.38862	0.963749	1.75407	1.53351	2.1996	1.47542	CHROMOSOME_II	11743329	11748548	-	WBGene00001679	gpb-1	cds
H36L18.2	4	0	0	0	0.346283	0.612866	0.611658	0	0.863753	0.55692	1.13609	1.13609	CHROMOSOME_X	12652517	12653452	-	WBGene00010424		cds
Y63D3A.5	4	4.69963	4.70717	4.49863	4.97929	5.3413	5.23572	4.88477	5.81323	5.34646	5.87028	1.37165	CHROMOSOME_I	14101265	14104463	+	WBGene00006565	tfg-1	cds
Y71F9AL.18	4	3.79602	3.63767	3.53464	3.93493	4.5174	4.52863	4.14168	4.89207	4.51928	4.88751	1.35743	CHROMOSOME_I	2907729	2924717	-	WBGene00004049	pme-1	cds
C07A9.3	4	2.78117	2.74365	2.4194	3.23711	3.59828	3.64936	3.6343	3.87983	3.11311	3.64688	1.46044	CHROMOSOME_III	9699797	9710184	+	WBGene00006579	tlk-1	cds
F35G12.4	4	2.40512	2.45952	2.12878	2.65925	3.40943	3.29299	3.32884	3.34306	3.03417	3.28655	1.28065	CHROMOSOME_III	4578823	4581664	+	WBGene00009441		cds
W09C5.2	4	4.49083	4.05475	3.48829	4.48879	5.09627	5.0824	5.03884	5.15575	5.20051	4.9653	1.71222	CHROMOSOME_I	13629214	13633485	+	WBGene00006793	unc-59	cds
C13B4.2	4	5.2383	4.69557	5.03506	5.34048	5.60555	5.49064	5.63129	5.54249	5.60355	5.83477	1.1392	CHROMOSOME_II	14485549	14488615	-	WBGene00006856	usp-14	cds
F37D6.2	4	3.06168	2.38728	3.16473	3.34751	3.77707	3.64064	3.79244	3.75625	3.58149	4.12648	1.7392	CHROMOSOME_I	10475513	10478120	-	WBGene00009508		cds
K02B12.3	4	4.00411	3.44334	4.04856	4.41025	4.55669	4.73348	4.78917	4.76734	4.54605	4.77342	1.34583	CHROMOSOME_I	8509109	8511406	-	WBGene00010496	sec-12	cds
Y51H7C.3	4	1.60389	0.52069	1.43683	2.46028	3.24774	3.48192	3.79142	3.42071	3.74473	3.77864	3.27073	CHROMOSOME_II	1438504	1439705	+	WBGene00021781		cds
T09A12.4	4	2.91724	2.5959	3.16791	3.46203	3.45165	3.5923	3.68811	3.4998	3.69079	3.73854	1.14264	CHROMOSOME_IV	8226327	8236588	-	WBGene00003656	nhr-66	cds
K10D3.3	4	1.48978	1.23587	1.89639	2.71992	3.00139	4.00005	4.10312	3.56964	3.46321	4.41729	3.18142	CHROMOSOME_I	7132497	7134328	+	WBGene00006394		cds
R01B10.1	4	3.56691	3.13029	3.94571	3.9847	4.2867	4.72918	4.73819	4.83435	4.66154	5.18916	2.05886	CHROMOSOME_V	6044043	6045654	+	WBGene00000534	cpi-2	cds
C27F2.10	4	3.04157	2.74365	3.09407	3.89829	4.19796	3.95768	4.60483	3.95801	3.73912	4.58355	1.86118	CHROMOSOME_III	4984981	4986896	-	WBGene00016171		cds
C18E9.11	4	4.25537	3.758	3.75273	4.33259	4.6935	4.38235	4.81426	4.72325	4.60186	4.92325	1.17052	CHROMOSOME_II	8993105	8994473	+	WBGene00003870	ooc-5	cds
Y53H1A.2	4	3.52578	3.13029	3.1909	3.77893	3.93529	3.63228	4.29162	4.36078	4.13611	4.08277	1.23048	CHROMOSOME_I	11222358	11224156	+	WBGene00013178		cds
B0285.8	4	0	0	0	0	0	0.708702	0.963749	1.97608	0.55692	0	1.97608	CHROMOSOME_III	4365347	4367441	+	WBGene00000511	ckb-1	cds
W03C9.6	4	0	0	0.217437	0	0.357971	0.799629	0.963749	2.00735	0.567086	0.292055	2.00735	CHROMOSOME_II	11953176	11960678	+	WBGene00012222		cds
Y48G9A.9	4	0	0	0	0	0	0.990982	0.963749	2.0973	0.567086	0.534825	2.0973	CHROMOSOME_III	2092751	2099873	+	WBGene00021702		cds
B0513.1	4	0	0	0	0	0.19006	0.708702	0.560897	1.75407	0.567086	0.924125	1.75407	CHROMOSOME_IV	13888064	13892988	+	WBGene00001562	lin-66	cds
F11C1.1	4	0	0	0	0	0	0.611658	0.560897	1.75407	0.567086	0.742567	1.75407	CHROMOSOME_X	12987265	12989243	-	WBGene00008690		cds
F41B5.9	4	0	0	0	0	0	0.507611	0.560897	1.35238	0.55692	0.534825	1.35238	CHROMOSOME_V	2257423	2259797	-	WBGene00018265	nhr-182	cds
F44G4.8	4	0	0	0	0	0	0.507611	0.966147	2.30054	0.567086	0.742567	2.30054	CHROMOSOME_II	9005737	9019705	-	WBGene00009717	dep-1	cds
C06H2.4	4	0	0	0.217437	0.210329	0.146475	0.73862	0.963749	1.40028	0.567086	0.806592	1.40028	CHROMOSOME_V	11141480	11143045	+	WBGene00007388	folt-1	cds
K08H2.8	4	0	0	0.406354	0.183506	0	1.01563	1.75667	2.69594	0.973102	1.85602	2.69594	CHROMOSOME_X	13251895	13256152	+	WBGene00003626	nhr-32	cds
C54G7.2	4	0	0	0	0	0	1.01563	0.963749	1.75407	0.55692	1.27633	1.75407	CHROMOSOME_X	5519841	5522791	-	WBGene00016934	mboa-3	cds
F17C8.1	4	0	0	0	0	0.319239	0.357416	0.560897	1.30282	0	0.292055	1.30282	CHROMOSOME_III	4722177	4730835	+	WBGene00000068	acy-1	cds
ZC443.3	4	0	0	0	0	0.19006	0.472435	0.560897	1.40028	0	0.534825	1.40028	CHROMOSOME_V	12812274	12814107	-	WBGene00013898		cds
R13H8.1	4	3.48168	3.71133	3.49628	3.72983	3.80733	3.98141	3.9773	4.68991	3.64079	4.08922	1.20823	CHROMOSOME_I	10750332	10776689	+	WBGene00000912	daf-16	cds
R09F10.4	4	0	0.52069	0	0.514232	0.508361	0.799629	1.53804	2.0973	0	0.924125	2.0973	CHROMOSOME_X	8299775	8302330	-	WBGene00002127	inx-5	cds
T17A3.2	4	0	0	0	0	0.19006	0.827736	1.53965	2.06793	0	0.742567	2.06793	CHROMOSOME_III	134493	137964	+	WBGene00020540		cds
T27C4.2	4	0	0	0	0	0.146475	0.799629	1.53642	2.00735	0	0.980726	2.00735	CHROMOSOME_V	3727247	3731755	-	WBGene00020855	hpo-36	cds
Y47D3A.17	4	2.09889	2.35644	2.35783	2.31279	2.96956	2.909	2.64005	3.7882	2.40101	3.08474	1.68931	CHROMOSOME_III	11257206	11270760	-	WBGene00012930	obr-1	cds
Y48G1A.1	4	0.645513	1.02238	1.06876	1.192	1.45086	1.57119	1.53804	2.30054	0.957729	1.40414	1.65502	CHROMOSOME_I	348538	357235	+	WBGene00021657		cds
C18D11.4	4	6.48468	6.64802	6.20166	6.29256	6.31577	6.55438	6.5954	7.27529	6.57633	6.65299	1.07363	CHROMOSOME_III	11826115	11831375	+	WBGene00004705	rsp-8	cds
ZK813.3	4	0.748353	0.463942	0	0	0	0.799629	0.963749	1.97608	0.973102	0.806592	1.97608	CHROMOSOME_X	3441826	3442447	+	WBGene00022822		cds
T03D3.5	4	2.17036	2.45952	1.87263	1.06947	1.33054	2.5514	3.10755	3.24795	2.11753	2.5339	2.17848	CHROMOSOME_V	2823865	2826824	-	WBGene00020183		cds
C05D11.13	4	0.748353	1.78318	0.631163	1.37774	1.55454	2.55052	2.26543	2.69594	1.54385	1.82544	2.06477	CHROMOSOME_III	6443023	6443919	-	WBGene00015488		cds
W02D9.1	4	4.6875	5.14564	4.45109	4.92962	5.06355	5.08517	5.46988	5.52909	4.99708	5.51608	1.07799	CHROMOSOME_I	12528302	12532172	-	WBGene00004181	pri-2	cds
B0496.8	4	0	0	0.406354	0	0.401176	0.611658	2.84607	2.06793	1.53869	0.534825	2.84607	CHROMOSOME_IV	7449073	7451434	-	WBGene00015217	tes-1	cds
K05B2.5	4	0	0	0.217437	0.183506	0.437796	0.578957	2.74604	1.71672	1.53869	0	2.74604	CHROMOSOME_X	4921221	4929720	-	WBGene00003986	pes-22	cds
F17C11.4	4	0	0	0.217437	0.183506	0.19006	0.611658	1.53965	0.863753	0.957729	0.292055	1.53965	CHROMOSOME_V	10951962	10953462	+	WBGene00008915		cds
ZK287.2	4	0	0	0	0.183506	0.19006	0.472435	2.2664	0.793736	1.54385	0.292055	2.2664	CHROMOSOME_V	9670008	9673547	-	WBGene00013963	sulp-8	cds
F35F10.11	4	0	0	0.290991	0.183506	0	0.507611	1.94649	1.79048	1.27726	0.292055	1.94649	CHROMOSOME_V	3310121	3312114	-	WBGene00018060	arrd-18	cds
ZK1321.2	4	0	0	0	0	0	0.189748	1.53965	1.79048	0.957729	0	1.79048	CHROMOSOME_II	9758175	9768206	+	WBGene00014261	shk-1	cds
C01G6.4	4	2.6576	2.68369	3.54219	3.19622	3.23296	3.6207	4.25471	4.55865	4.21708	3.6892	1.90105	CHROMOSOME_II	9271202	9272984	-	WBGene00007226		cds
W04A4.2	4	0	0.283709	1.34743	1.90599	1.75697	1.87888	4.2191	3.96599	3.57016	1.94278	4.2191	CHROMOSOME_I	13682410	13684328	+	WBGene00012231		cds
F49E2.5	4	0.645513	0	0.686727	1.40121	1.118	1.4278	2.52728	2.50079	2.40385	0.806592	2.52728	CHROMOSOME_X	9543613	9560259	+	WBGene00009888		cds
Y66C5A.1	4	0	0	0.290991	1.10371	0.401176	1.58772	2.39963	2.5226	1.93612	0.534825	2.5226	CHROMOSOME_X	14454634	14455451	-	WBGene00044156		cds
C06G3.5	4	0	0	0	0.5356	0.319239	1.26857	1.28024	2.99038	2.12098	0.534825	2.99038	CHROMOSOME_IV	7024200	7028135	+	WBGene00015551		cds
R12H7.5	4	0	0	0	0	0.146475	0.708702	0.560897	1.35238	0.973102	0.292055	1.35238	CHROMOSOME_X	13222848	13223477	-	WBGene00004826	skr-20	cds
Y51A2D.15	4	0	0	0	0	0	0.708702	0.560897	1.40028	0.965436	0.292055	1.40028	CHROMOSOME_V	18592729	18613916	+	WBGene00013082		cds
Y54G2A.16	4	0	0	0	0	0	0.827736	0.560897	1.40028	0.973102	0	1.40028	CHROMOSOME_IV	2855589	2857113	-	WBGene00021881		cds
F42G2.6	4	0	0.52069	0.217437	0.370268	0.19006	1.26857	0.963749	2.50079	1.27105	0.534825	2.50079	CHROMOSOME_II	2426377	2429949	-	WBGene00018355	ceh-86	cds
C15C7.7	4	0	0	0	0.370268	0.508361	0.827736	2.1153	2.24914	1.7555	0.292055	2.24914	CHROMOSOME_X	3165786	3167589	+	WBGene00015793		cds
Y71A12C.2	4	0	0	0	0	0.19006	0.507611	0.963749	1.30282	0.965436	0.292055	1.30282	CHROMOSOME_I	14046121	14048005	-	WBGene00013513		cds
F45E6.3	4	0	0	0	0	0.508361	0.911667	1.53965	1.71672	0.965436	0.292055	1.71672	CHROMOSOME_X	12484986	12491034	+	WBGene00009726	tbc-13	cds
Y94H6A.10	4	0.748353	0	0.686727	0.70293	1.11467	1.70319	2.52565	3.07413	2.12098	0.980726	3.07413	CHROMOSOME_IV	2709898	2710668	-	WBGene00022382		cds
F11C1.7	4	0	0	0	0	0	0.73862	0.963749	1.35238	0.965436	0.292055	1.35238	CHROMOSOME_X	12989274	12991268	+	WBGene00045495		cds
F39H12.1	4	0	0	0	0	0	0.827736	0.966147	1.35238	0.965436	0.534825	1.35238	CHROMOSOME_X	834777	837817	+	WBGene00018212		cds
F35H8.6	4	0	0	0	0	0.19006	1.6553	1.75805	2.27507	1.75994	0.292055	2.27507	CHROMOSOME_II	9584319	9586726	-	WBGene00009450	ugt-58	cds
T03G6.2	4	0	0	0.217437	0	0.508361	1.86397	1.94892	2.73382	1.94394	0.742567	2.73382	CHROMOSOME_X	2593996	2606724	+	WBGene00003630	nhr-40	cds
W02C12.3	4	0	0	0	0.183506	0.319239	1.03986	1.28024	1.40028	1.27726	0.292055	1.40028	CHROMOSOME_IV	4015480	4028123	-	WBGene00020930	hlh-30	cds
C18A3.4	4	0	0.859132	0.723047	0.5356	0.357971	1.33087	1.75667	2.35017	1.94784	0.292055	2.35017	CHROMOSOME_II	5707672	5712332	+	WBGene00015942		cds
F35G2.4	4	0	0.283709	0.406354	0	0.146475	0.472435	0.966147	1.35238	0.957729	0	1.35238	CHROMOSOME_IV	12211073	12215967	-	WBGene00004025	phy-2	cds
M01E11.7	4	0.748353	1.8272	1.45853	1.27521	1.62444	1.97129	2.74813	2.88474	2.2631	1.63011	2.13638	CHROMOSOME_I	5583408	5597335	-	WBGene00006508	tag-163	cds
C15C7.2	4	0	0	0	0.39386	0.883516	2.07242	2.40317	1.79048	2.52428	0	2.52428	CHROMOSOME_X	3159928	3164419	+	WBGene00002220	klp-8	cds
F08C6.3	4	0	0	0	0	0.19006	1.48372	1.94649	1.40028	1.95172	0.292055	1.95172	CHROMOSOME_X	7565275	7568103	+	WBGene00007059	vps-52	cds
T28A11.21	4	0	0	0	0	0.279439	1.40932	1.9477	1.35238	2.25997	0.292055	2.25997	CHROMOSOME_V	3277002	3278128	-	WBGene00020883	fbxa-64	cds
F42G9.6	4	2.20693	2.446	2.25728	2.32511	2.50381	3.11718	3.74209	3.43227	3.33883	2.437	1.53516	CHROMOSOME_III	778237	783299	-	WBGene00018364		cds
M04C9.3	4	0	0	0.217437	0.210329	0.19006	0.708702	1.28024	1.35238	1.54385	0	1.54385	CHROMOSOME_I	9352873	9354533	-	WBGene00010858		cds
R90.1	4	0.645513	0	0.982581	0.346283	0.644543	2.00989	3.10647	2.03796	2.85373	1.08537	3.10647	CHROMOSOME_V	12891511	12895858	-	WBGene00011283		cds
R07C3.2	4	0	0	0	0	0	1.03986	0.963749	1.35238	1.94394	0.292055	1.94394	CHROMOSOME_II	941021	943169	+	WBGene00019918	fbxc-36	cds
Y113G7A.4	4	0	0	0.217437	0	0.19006	1.03986	0.963749	1.35238	1.53869	0.534825	1.53869	CHROMOSOME_V	20105601	20120644	-	WBGene00003566	ncx-1	cds
C03H5.5	4	0	0	0	0.183506	0.508361	0.472435	1.53965	1.67837	1.27726	0.806592	1.67837	CHROMOSOME_II	382273	385354	-	WBGene00015407		cds
H02I12.1	4	7.61997	7.84981	7.85624	7.72395	7.75235	8.09031	8.91537	9.2122	9.06621	8.69461	1.59223	CHROMOSOME_IV	11372967	11377578	+	WBGene00010351	cbd-1	cds
K02F3.5	4	0	0	0.290991	0.346283	0.319239	0.507611	1.9477	2.00735	1.75105	1.27633	2.00735	CHROMOSOME_III	823215	826405	+	WBGene00019328	clec-149	cds
R13.3	4	0	0	0	0.183506	0.357971	0.318328	1.9477	2.00735	1.7555	1.27633	2.00735	CHROMOSOME_IV	10829531	10832228	-	WBGene00011258		cds
T12A7.1	4	0	0	0	0	0	0.318328	1.53804	1.67837	1.27726	0.924125	1.67837	CHROMOSOME_IV	11745617	11748662	+	WBGene00001577	gem-4	cds
F13D2.1	4	0	0.283709	0.573373	0.370268	0.357971	0.472435	1.53965	1.67837	1.75994	0.806592	1.75994	CHROMOSOME_X	11163892	11175082	-	WBGene00008735		cds
C06E7.3	4	5.8274	5.56172	5.57309	5.83156	5.82245	5.79453	6.48462	6.67684	6.67039	6.05652	1.11512	CHROMOSOME_IV	5843971	5846359	-	WBGene00015540	sams-4	cds
F15A4.9	4	0	0	0	0	0	0	0.963749	1.71672	1.52832	0.292055	1.71672	CHROMOSOME_II	12479239	12480846	-	WBGene00008843	arrd-9	cds
K02A2.3	4	0	0	0	0	0	0	0.963749	1.35238	1.27105	0.292055	1.35238	CHROMOSOME_II	7425893	7431348	-	WBGene00019289	kcc-3	cds
T12A2.3	4	0	0	0	0	0	0	1.28024	2.00735	1.54385	0.534825	2.00735	CHROMOSOME_III	6240754	6241529	+	WBGene00020438		cds
Y57G11B.2	4	0	0	0	0	0	0	1.28024	1.79048	1.27105	0.292055	1.79048	CHROMOSOME_IV	14565332	14567365	+	WBGene00013295		cds
R03G5.6	4	0	0	0	0	0	0.357416	0.966147	2.06793	1.76436	0	2.06793	CHROMOSOME_X	7805632	7809034	-	WBGene00019847		cds
Y92H12A.2	4	0.645513	0.52069	0	0.370268	0.612866	0.855307	2.11313	2.24914	1.94784	0.806592	2.24914	CHROMOSOME_I	1543527	1556197	+	WBGene00022358		cds
C10G6.1	4	0	0	0.217437	0	0.146475	0.708702	1.28024	2.27507	1.27726	1.23039	2.27507	CHROMOSOME_IV	5820359	5830189	+	WBGene00015680	egal-1	cds
F39G3.2	4	0	0	0	0	0.146475	0.318328	0.963749	1.75407	1.28344	0.806592	1.75407	CHROMOSOME_V	4737753	4741155	+	WBGene00018207		cds
R160.3	4	0	0	0.217437	0.210329	0.279439	0.578957	0.963749	2.69594	1.52832	1.40414	2.69594	CHROMOSOME_X	4365297	4366293	-	WBGene00020120		cds
C46H11.2	4	0	0	0	0	0	0	0.963749	1.71672	0.567086	0.806592	1.71672	CHROMOSOME_I	5050052	5052526	+	WBGene00016728		cds
K07C11.3	4	0	0	0	0	0	0	0.966147	1.40028	0.973102	0.806592	1.40028	CHROMOSOME_V	8206847	8207979	+	WBGene00019476		cds
R07E3.4	4	0	0	0	0	0	0	0.966147	1.67837	0.957729	0.980726	1.67837	CHROMOSOME_X	10330536	10331813	-	WBGene00011105		cds
K09E2.3	4	0	0	0	0.5356	0	0.578957	1.9477	2.85066	1.54385	1.55921	2.85066	CHROMOSOME_X	8676622	8677917	+	WBGene00019572		cds
F28D1.2	4	0.748353	0.52069	0.825618	0.514232	0.19006	0.507611	1.53804	2.24914	1.53869	1.40414	2.05908	CHROMOSOME_IV	12374471	12376097	-	WBGene00009212		cds
Y57A10A.26	4	0	0	0.723047	0	0	0.507611	1.28024	1.97608	0.965436	0.980726	1.97608	CHROMOSOME_II	12264101	12266040	+	WBGene00013266		cds
C17H12.11	4	0	0.283709	0.406354	0.370268	0	0	0.963749	2.32557	0.567086	1.27633	2.32557	CHROMOSOME_IV	6804600	6805991	+	WBGene00015936		cds
T01E8.1	4	0	0.283709	0.406354	0.370268	0.19006	0	0.963749	2.35017	0.965436	1.13609	2.35017	CHROMOSOME_II	10206655	10209331	+	WBGene00011331		cds
T13G4.3	4	0	0	0.217437	0	0.146475	0	0.560897	1.75407	0.55692	0.924125	1.75407	CHROMOSOME_X	1163150	1177157	+	WBGene00020490	tmc-1	cds
B0218.1	4	0	0	0.406354	0	0.357971	1.58944	2.26543	1.40028	0.957729	0.292055	2.26543	CHROMOSOME_IV	8159344	8162028	+	WBGene00015047	faah-1	cds
ZK662.3	4	0	0	0	0	0	0.578957	1.53965	0.793736	0.55692	0	1.53965	CHROMOSOME_X	15708153	15716345	+	WBGene00003638	nhr-48	cds
F36D1.9	4	0	0.463942	0	0.39386	0.357971	1.5527	1.94649	1.97608	0.973102	0.534825	1.97608	CHROMOSOME_I	11274961	11276322	-	WBGene00009468		cds
ZK856.7	4	0	0	0	0.370268	0.319239	1.18184	1.9477	2.03796	0.965436	0	2.03796	CHROMOSOME_V	10201830	10202573	+	WBGene00014108		cds
F40H3.6	4	0	0	0	0.346283	0	1.1599	1.75667	1.35238	0.567086	0	1.75667	CHROMOSOME_II	6186944	6187326	-	WBGene00018252		cds
T27E4.2	4	0	0	0	0.556656	0.19006	1.3111	2.11313	1.30282	0.567086	0.292055	2.11313	CHROMOSOME_V	9090055	9090582	+	WBGene00002017		cds
T27E4.8	4	0	0	0	0.556656	0.19006	1.3111	1.94528	1.30282	0.567086	0.292055	1.94528	CHROMOSOME_V	9087271	9087760	-	WBGene00002015		cds
C03C11.2	4	0	0	0	0.210329	0	0.507611	1.28024	0.863753	0	0	1.28024	CHROMOSOME_I	10016768	10018105	+	WBGene00001483	fog-3	cds
C30F2.1	4	0	0	0	0	0	0.318328	1.28024	0.793736	0	0	1.28024	CHROMOSOME_X	16072831	16074780	+	WBGene00000760	col-187	cds
F20C5.4	4	0	0	0	0	0	0.318328	1.28024	0.793736	0	0.292055	1.28024	CHROMOSOME_IV	8764867	8767437	+	WBGene00008969		cds
F48E3.1	4	0	0	0	0	0.19006	1.03986	1.75667	0.793736	0	0	1.75667	CHROMOSOME_X	7485819	7490651	+	WBGene00001637	gly-12	cds
R119.5	4	0	0.283709	0	0	0.47351	1.06369	2.40317	1.30282	0	0	2.40317	CHROMOSOME_I	388510	394418	-	WBGene00020090		cds
Y46H3A.2	4	0	0	0.290991	0	0.19006	0.578957	1.27832	0.793736	0	0	1.27832	CHROMOSOME_V	1805232	1805874	+	WBGene00002018		cds
T02C5.3	4	0	0	0.406354	0.39386	0.146475	0.963258	1.28024	0.793736	0.55692	0.534825	1.28024	CHROMOSOME_X	2698505	2705859	-	WBGene00020160	igcm-3	cds
Y39A3CL.5	4	0	0	0.290991	0.765123	0.71031	2.11985	2.64155	1.40028	1.28344	0.924125	2.64155	CHROMOSOME_III	1807725	1818316	-	WBGene00000545	clp-4	cds
T27E4.3	4	0	0	0.290991	0.957329	0.883516	1.68794	2.26446	1.67837	0.567086	1.32086	2.26446	CHROMOSOME_V	9088109	9088595	+	WBGene00002019		cds
T27E4.9	4	0	0	0.533026	1.06947	0.883516	1.44794	2.26446	1.67837	0.567086	0.806592	2.26446	CHROMOSOME_V	9089258	9089744	-	WBGene00002020		cds
C01B4.6	4	0	0	0	0	0	1.60576	2.84672	1.40028	0.567086	1.82544	2.84672	CHROMOSOME_V	2501050	2502425	+	WBGene00015270		cds
F47G4.4	4	0	0	0	0.210329	0.19006	1.35038	2.52647	1.30282	0.55692	1.40414	2.52647	CHROMOSOME_I	14062721	14068797	-	WBGene00009825		cds
Y46G5A.15	4	0	0	0.290991	0	0	0.911667	2.11638	0.863753	0.55692	1.40414	2.11638	CHROMOSOME_II	12782680	12785336	-	WBGene00012906		cds
C44H4.5	4	0	0	0	0	0.19006	1.08957	2.52565	0.793736	0	1.27633	2.52565	CHROMOSOME_X	14589567	14591894	+	WBGene00006524	tap-1	cds
Y110A2AL.1	4	0	0	0	0	0	0.472435	1.28024	0.793736	0	0.924125	1.28024	CHROMOSOME_II	2875105	2876769	+	WBGene00022438		cds
Y49F6C.3	4	0	0	0	0	0.19006	0.708702	1.27832	0.793736	0	0.980726	1.27832	CHROMOSOME_II	3377114	3378729	+	WBGene00021725	bath-9	cds
Y26E6A.2	4	0	0	0	0	0	1.08957	1.53642	1.35238	0	1.13609	1.53642	CHROMOSOME_X	13910869	13912912	-	WBGene00012513		cds
C49C3.8	4	0	0.463942	0	0	0.146475	0.855307	1.28024	0.863753	0	0.742567	1.28024	CHROMOSOME_IV	17335233	17336648	+	WBGene00008198		cds
M04F3.4	4	0.645513	1.13307	0.533026	0.892559	0.860708	1.63787	2.2664	1.79048	0.965436	1.63011	1.73338	CHROMOSOME_I	4771487	4773048	-	WBGene00019770		cds
F08F1.5	4	0	0	0	0	0	1.26857	2.6408	1.40028	0.55692	0.742567	2.6408	CHROMOSOME_X	8413962	8416866	-	WBGene00000422	ced-8	cds
K07E3.2	4	0	0	0	0	0.19006	2.05938	3.18498	1.71672	0.567086	0.924125	3.18498	CHROMOSOME_X	8104259	8107508	+	WBGene00019491		cds
F08G12.3	4	0	0	0	0	0.508361	1.03986	2.40229	1.35238	0.973102	0.924125	2.40229	CHROMOSOME_X	11300219	11302553	+	WBGene00008587		cds
F56A8.9	4	0	0	0	0	0.357971	0.611658	1.94892	0.793736	0.567086	0.534825	1.94892	CHROMOSOME_III	13254567	13256284	+	WBGene00185001		cds
H27C11.1	4	0	0.283709	0.217437	0	0.319239	0.73862	1.53804	0.793736	0.55692	0.742567	1.53804	CHROMOSOME_IV	9757628	9764467	+	WBGene00003687	nhr-97	cds
F09G8.2	4	0	0	0	0	0	0.827736	2.1153	0.863753	0.965436	1.13609	2.1153	CHROMOSOME_III	8268544	8270664	+	WBGene00007056	crn-7	cds
M03B6.4	4	0	0	0	0	0	0.472435	1.53804	0.793736	0.55692	0.806592	1.53804	CHROMOSOME_X	13859038	13872958	+	WBGene00010836		cds
F33H2.7	4	0	0	0	0	0.146475	0.708702	2.64005	0.863753	0.973102	1.48288	2.64005	CHROMOSOME_I	15027489	15030543	-	WBGene00009370	set-10	cds
Y54G2A.4	4	0	0.283709	0.217437	0	0	0.507611	1.9477	0.863753	0.55692	0.806592	1.9477	CHROMOSOME_IV	2931407	2936824	+	WBGene00021870		cds
C48E7.1	4	0.748353	0.283709	0.406354	0	0.19006	1.13527	1.75667	1.30282	1.27105	0.534825	1.75667	CHROMOSOME_I	6260251	6264527	+	WBGene00016749		cds
F52E4.8	4	0.645513	0	0	0	0	1.22475	1.53804	0.863753	0.55692	0.292055	1.53804	CHROMOSOME_X	3100103	3102222	-	WBGene00018704	ztf-13	cds
T22H2.5	4	0.748353	0	0	0	0	0.708702	1.28024	0.793736	0.55692	0.292055	1.28024	CHROMOSOME_I	11688675	11690823	-	WBGene00011935	scrm-1	cds
F32E10.2	4	3.02359	2.53033	2.86789	2.32121	2.97926	3.20776	4.25471	3.67573	3.18795	3.52066	1.9335	CHROMOSOME_IV	7576170	7577315	+	WBGene00017990	cec-4	cds
F41H10.8	4	0.748353	0	0.290991	0	0.19006	0.472435	1.28024	0.863753	0.55692	0.534825	1.28024	CHROMOSOME_IV	5386619	5388553	-	WBGene00001244	elo-6	cds
T05E7.5	4	0.748353	0	0.723047	0	0.146475	0.708702	1.94649	1.30282	0.567086	0.742567	1.94649	CHROMOSOME_I	6200797	6202348	-	WBGene00020261	vet-1	cds
B0334.3	4	2.01886	2.38728	2.51995	2.18275	2.33362	2.31534	3.18446	3.00595	2.64265	3.1224	1.1656	CHROMOSOME_II	11489541	11492957	-	WBGene00007143		cds
C13C4.4	4	0	0	0	0	0.508361	0.911667	2.93962	2.03796	1.54899	2.7253	2.93962	CHROMOSOME_V	12109149	12110959	-	WBGene00007548		cds
F43C9.4	4	0	0	0	0	0.319239	0.189748	1.28024	0.793736	0.567086	0.980726	1.28024	CHROMOSOME_X	4796059	4800098	-	WBGene00003245	mig-13	cds
ZC373.1	4	0	0	0	0	0.47351	0.578957	1.53804	1.40028	0.55692	1.23039	1.53804	CHROMOSOME_X	10054221	10057468	+	WBGene00013866	cbs-1	cds
F36G3.1	4	0	0	0.217437	0	0.19006	0.357416	1.75805	1.71672	1.28344	1.55921	1.75805	CHROMOSOME_X	9780311	9789153	-	WBGene00009482		cds
W01A11.5	4	0	0	0.217437	0	0	0	1.75528	1.67837	0.957729	1.48288	1.75528	CHROMOSOME_V	6490051	6493904	-	WBGene00020911	cpt-6	cds
M03B6.2	4	0	0	0.290991	0	0.71031	0	2.64005	2.45616	1.27105	1.48288	2.64005	CHROMOSOME_X	13852831	13857256	+	WBGene00010834		cds
B0545.4	4	0	0.283709	0.573373	0.625329	0.513436	0.472435	2.74743	2.06793	0.965436	1.36215	2.74743	CHROMOSOME_IV	109054	109943	-	WBGene00015247		cds
F31D4.8	4	0	0	0	0.664651	0.279439	0.318328	1.9477	1.40028	0.973102	1.13609	1.9477	CHROMOSOME_V	20866722	20868398	-	WBGene00009293		cds
T14A8.1	4	0	0	0	0.346283	0.146475	0	1.53965	0.863753	0.55692	0.292055	1.53965	CHROMOSOME_IV	7818239	7821149	+	WBGene00004363	ric-3	cds
DC2.7	4	0	0	0	0	0	0	1.27832	1.75407	0	1.55921	1.75407	CHROMOSOME_V	228886	234673	-	WBGene00017083	kin-33	cds
Y45F10B.13	4	0	0	0	0	0.19006	0.189748	1.53642	1.40028	0	1.27633	1.53642	CHROMOSOME_IV	13549567	13561628	-	WBGene00012875		cds
K06H7.9	4	3.36085	3.66265	3.89339	3.68185	3.91116	3.61222	4.51691	4.63581	3.63113	4.32267	1.27496	CHROMOSOME_III	8091640	8092977	+	WBGene00019460	idi-1	cds
K08B12.3	4	0	0	0	0.183506	0	0.189748	1.53965	0.863753	0	0.980726	1.53965	CHROMOSOME_V	6235157	6237654	+	WBGene00019522		cds
Y60A3A.21	4	0	0	0	0.183506	0	0	1.53965	0.793736	0	1.13609	1.53965	CHROMOSOME_V	20011928	20015046	+	WBGene00013366		cds
Y38E10A.3	4	0	0	0	0	0	0	1.53965	0.793736	0	0.534825	1.53965	CHROMOSOME_II	12573931	12574703	-	WBGene00012581		cds
C05C10.2	4	2.43626	2.75552	2.9308	3.38036	3.422	3.33379	3.88783	3.76543	3.10615	3.97034	1.53407	CHROMOSOME_II	9922189	9930771	+	WBGene00007329		cds
D1007.16	4	2.75961	3.21745	3.25962	3.71905	3.73355	3.62829	4.29042	4.46592	3.78915	4.16919	1.70631	CHROMOSOME_I	4603224	4604197	+	WBGene00017011	eaf-1	cds
F21G4.1	4	0	0	0	0.556656	1.06871	0.318328	1.94892	1.97608	0.55692	1.40414	1.97608	CHROMOSOME_X	9889257	9892270	-	WBGene00009023		cds
ZK54.2	4	0	0	0.217437	0.683918	1.01766	0.357416	1.53804	2.30054	1.28344	1.55921	2.30054	CHROMOSOME_X	17467046	17474460	-	WBGene00006602	tps-1	cds
B0336.4	4	0.748353	0.675026	1.43683	1.45114	1.73808	1.85033	2.74604	1.71672	1.75994	2.80513	2.1301	CHROMOSOME_III	5698390	5702257	+	WBGene00004348	rgs-5	cds
Y38A10A.6	4	2.73478	2.77813	3.2472	2.86127	3.31963	3.09819	3.88846	3.14614	3.02682	3.77864	1.15368	CHROMOSOME_V	6097086	6099029	+	WBGene00021391		cds
F55A8.1	4	0	0	0.217437	0	0.644543	1.13527	1.75805	0.793736	0.55692	1.52155	1.75805	CHROMOSOME_IV	1902323	1917614	+	WBGene00001186	egl-18	cds
T19E7.2	4	3.19297	2.90911	3.31665	2.83251	3.77655	4.17648	4.45511	3.89663	3.73687	4.27355	1.62259	CHROMOSOME_IV	5651074	5660514	-	WBGene00004804	skn-1	cds
T07C4.9	4	0.748353	0	0.906233	0.514232	1.33341	1.44605	2.52484	1.30282	0.965436	1.7637	2.52484	CHROMOSOME_III	10325542	10330328	-	WBGene00003589	nex-2	cds
C27F2.9	4	2.24261	2.51543	2.88788	2.22522	2.65832	3.21786	3.18549	3.16012	2.74086	3.61187	1.38665	CHROMOSOME_III	4961774	4963055	-	WBGene00043156		cds
C35D10.1	4	3.09879	3.42062	3.78268	3.34035	3.64557	3.99632	4.06183	3.78361	3.63717	4.16308	1.06429	CHROMOSOME_III	4879664	4881461	+	WBGene00016439		cds
D2030.1	4	3.08151	3.80932	3.94571	3.4117	3.86572	3.93134	4.21784	3.96599	3.93253	4.5702	1.48868	CHROMOSOME_I	7567817	7571246	-	WBGene00008411		cds
F20D6.4	4	3.52578	3.42116	4.09049	3.33427	4.15403	4.04689	4.28946	4.2637	3.78915	4.5972	1.26293	CHROMOSOME_V	8179111	8183422	+	WBGene00005648	srp-7	cds
ZK652.11	4	2.87508	2.54309	3.26875	2.80198	3.04797	3.39192	3.51983	3.61095	3.25754	3.88494	1.34185	CHROMOSOME_III	7860399	7860937	-	WBGene00000835	cuc-1	cds
Y67H2A.10	4	1.54797	0.859132	2.36339	1.63788	1.85501	2.1424	3.02516	2.67661	1.53869	2.90956	2.16603	CHROMOSOME_IV	13282963	13289475	-	WBGene00013465		cds
ZK256.1	4	2.68379	2.43128	3.35124	2.77649	3.03254	3.50042	3.52024	3.55913	2.74535	3.25247	1.12786	CHROMOSOME_I	13004427	13023561	+	WBGene00004063	pmr-1	cds
C06G1.5	4	0	0	0.406354	0	0	0.189748	0.963749	0.863753	0	1.69921	1.69921	CHROMOSOME_X	16638205	16642988	-	WBGene00015548		cds
Y66D12A.24	4	0	0	0.47108	0	0.19006	0.611658	0.963749	0.863753	0	1.32086	1.32086	CHROMOSOME_III	11496739	11500618	+	WBGene00013448		cds
Y59A8B.12	4	3.40689	3.43545	4.08015	3.6136	3.58957	3.47305	4.02076	3.90496	3.63838	4.59266	1.18577	CHROMOSOME_V	18085602	18086409	-	WBGene00013349		cds
B0303.7	4	0	0.283709	0.723047	0	0.19006	2.30643	1.75805	3.34306	1.94784	2.28996	3.34306	CHROMOSOME_III	8693557	8699374	+	WBGene00015128		cds
C07D10.5	4	0	0.283709	0.775244	0.346283	0.508361	1.6709	1.53804	2.5226	1.76436	2.19854	2.5226	CHROMOSOME_II	7381395	7383447	+	WBGene00015569		cds
Y37D8A.19	4	0	0	0.996949	0	0	2.23366	1.94528	3.58537	2.27865	3.20787	3.58537	CHROMOSOME_III	12929672	12931335	+	WBGene00012557		cds
C16D9.6	4	0	0	0.217437	0	0	1.40932	0.966147	2.32557	1.28344	2.26841	2.32557	CHROMOSOME_V	8248092	8250269	-	WBGene00015861		cds
F02E8.5	4	0	0	0	0	0.146475	1.6219	1.28024	2.5226	1.28344	2.99325	2.99325	CHROMOSOME_X	4459609	4462584	-	WBGene00017178		cds
T05A10.1	4	0	0	0.406354	0.183506	0.508361	1.94587	0.966147	2.85066	1.94784	2.86582	2.86582	CHROMOSOME_X	10769223	10782897	+	WBGene00004862	sma-9	cds
C03H12.1	4	0	0	0.217437	0	0	1.95997	0.560897	1.75407	1.27726	2.24549	2.24549	CHROMOSOME_X	15689390	15696355	+	WBGene00007284		cds
F25H9.2	4	0	0	0	0	0.19006	1.50127	0.560897	1.40028	0.973102	1.82544	1.82544	CHROMOSOME_V	13458090	13459425	+	WBGene00009135		cds
F21C10.10	4	0	0	0.406354	0	0.146475	1.86397	0.560897	1.71672	1.53869	2.5339	2.5339	CHROMOSOME_V	9095985	9097202	+	WBGene00017659		cds
C35B8.2	4	0	0	0	0.183506	0	1.46594	0.560897	1.71672	1.28959	2.37594	2.37594	CHROMOSOME_X	9216817	9232016	-	WBGene00006887	vav-1	cds
K11C4.5	4	0	0.283709	0	0	0.644543	2.16576	0.560897	2.00735	1.94784	2.82072	2.82072	CHROMOSOME_V	6901669	6929020	-	WBGene00006801	unc-68	cds
F52D2.7	4	0	0.463942	0.775244	0.183506	0.19006	2.9031	2.26543	3.07413	2.39817	3.55834	3.55834	CHROMOSOME_X	1962565	1966164	+	WBGene00018689		cds
H13N06.3	4	0	0	0.217437	0.370268	0	1.77863	1.28024	1.40028	1.27726	2.31219	2.31219	CHROMOSOME_X	15493468	15497400	+	WBGene00001649	gob-1	cds
F08B4.6	4	2.24261	2.2787	2.21964	2.00682	2.66378	2.68434	2.93778	3.03659	2.93307	3.42328	1.41647	CHROMOSOME_IV	8688260	8691500	-	WBGene00002028	hst-1	cds
F32D1.5	4	5.79244	5.76135	5.53064	5.60769	5.97087	6.17754	5.92966	6.30636	6.40815	6.63792	1.10728	CHROMOSOME_V	4369337	4371351	-	WBGene00017984		cds
K11E8.1	4	0.748353	0	0.406354	0.183506	1.08847	1.60576	0.560897	2.03796	1.53351	2.85072	2.85072	CHROMOSOME_IV	10324295	10350196	-	WBGene00006779	unc-43	cds
M04G7.3	4	0	0	0	0	0.357971	0.911667	0.560897	1.30282	0.973102	2.33408	2.33408	CHROMOSOME_IV	461112	481167	-	WBGene00019774		cds
M151.3	4	0	0	0	0	0.644543	0.963258	0.560897	1.79048	0.965436	1.99744	1.99744	CHROMOSOME_II	3627201	3629134	+	WBGene00019795		cds
C06E1.1	4	0	0	0	0.183506	0	0.578957	0	0.793736	0.965436	1.7637	1.7637	CHROMOSOME_III	8605752	8606424	+	WBGene00015518		cds
F10G7.11	4	0	0	0	0.70293	0.19006	1.18184	0.560897	1.30282	1.28344	2.4769	2.4769	CHROMOSOME_II	4727315	4727868	-	WBGene00017374	ttr-41	cds
ZK1073.2	4	0	0	0	0.514232	0	0.708702	0	0.863753	0.567086	1.44495	1.44495	CHROMOSOME_X	16103571	16124272	+	WBGene00014214		cds
F44G3.6	4	0	0	0	0.183506	0	1.01563	0.560897	0.793736	0.567086	2.10206	2.10206	CHROMOSOME_V	16121760	16122621	+	WBGene00004809	skr-3	cds
Y34D9B.1	4	0	0	0	0.210329	0	0.611658	0.560897	0.793736	0.567086	1.32086	1.32086	CHROMOSOME_I	948569	957376	-	WBGene00003238	mig-1	cds
Y73B6BL.31	4	0	0	0	0.346283	0.547346	0.708702	0.560897	0.863753	0.567086	1.40414	1.40414	CHROMOSOME_IV	6442276	6446541	+	WBGene00022252		cds
F52B11.3	4	0	0	0.573373	0	0.19006	0.827736	0.560897	0.863753	0.965436	1.94278	1.94278	CHROMOSOME_IV	14091229	14096599	+	WBGene00009926	noah-2	cds
C02C6.3	4	0	0	0.723047	0.183506	0	1.18184	0.963749	1.35238	1.95172	1.52155	1.95172	CHROMOSOME_X	15546646	15552165	-	WBGene00007261	lron-3	cds
F13B9.5	4	0	0	0.217437	0.183506	0	1.24792	0.966147	1.75407	2.11406	1.99744	2.11406	CHROMOSOME_X	8275106	8283268	+	WBGene00002239	ksr-1	cds
F18H3.5	4	0	0	0.406354	0	0.357971	1.87747	0.963749	2.32557	2.93504	2.64158	2.93504	CHROMOSOME_X	13515785	13518834	-	WBGene00000406	cdk-4	cds
F17E5.2	4	0	0	0	0	0	1.68633	0.560897	2.30054	2.2631	2.437	2.437	CHROMOSOME_X	12394197	12399422	+	WBGene00008924		cds
T21H8.1	4	0	0.283709	0.290991	0	0	1.86539	0.966147	2.50079	2.63784	2.70939	2.70939	CHROMOSOME_X	13864970	13873289	-	WBGene00011904	hlb-1	cds
Y43F8B.2	4	0	0	0.290991	0	0	0.578957	0.560897	0.863753	1.27726	1.23039	1.27726	CHROMOSOME_V	19519895	19533080	-	WBGene00012813		cds
Y66D12A.12	4	0	0	0.406354	0	0.19006	1.40932	1.75528	2.27507	2.74982	3.1591	3.1591	CHROMOSOME_III	11561051	11562555	+	WBGene00013438	ztf-29	cds
C07A12.5	4	0	0	0	0.183506	0	2.71476	1.53804	1.30282	3.11137	2.96547	3.11137	CHROMOSOME_X	4514071	4516866	+	WBGene00005008	spr-3	cds
F20D1.6	4	0	0	0	0.183506	0.19006	2.25344	1.53642	1.35238	2.8558	2.78937	2.8558	CHROMOSOME_X	14983455	14987298	+	WBGene00004317	rbg-1	cds
K06G5.2	4	0	0	0	0	0	1.52042	0.560897	0.863753	1.95172	1.52155	1.95172	CHROMOSOME_X	14225504	14228845	+	WBGene00010606	cyp-13B2	cds
C28D4.9	4	0	0	0	0.492542	0.19006	1.46407	0.560897	0.863753	1.7555	1.52155	1.7555	CHROMOSOME_IV	9725232	9728549	+	WBGene00003728	nhr-138	cds
F41F3.2	4	0	0	0	0.183506	0.19006	1.03986	0.560897	0.793736	1.75105	1.23039	1.75105	CHROMOSOME_V	4642938	4646916	+	WBGene00004928	soc-1	cds
ZK792.8	4	0	0	0.217437	0.210329	0.357971	1.1126	0.560897	0.863753	2.27245	1.63011	2.27245	CHROMOSOME_IV	11668005	11671479	+	WBGene00014080		cds
Y4C6B.5	4	0	0	0.217437	0.183506	0.508361	1.68633	0.560897	0.793736	2.12098	1.85602	2.12098	CHROMOSOME_IV	5319243	5325032	+	WBGene00021159		cds
C17H12.14	4	3.93075	4.53517	4.34252	4.36795	4.70343	5.15308	4.78917	5.16618	5.71097	5.88493	1.95418	CHROMOSOME_IV	6791061	6792450	+	WBGene00006917	vha-8	cds
ZK1058.9	4	0	0.859132	0	0.370268	0.71031	1.30901	0.560897	1.71672	2.12443	2.58874	2.58874	CHROMOSOME_III	3923586	3926098	-	WBGene00014207		cds
F55H2.1	4	0	1.06116	0.573373	0.957329	0.739939	1.48372	0.963749	1.67837	2.53985	3.4041	3.4041	CHROMOSOME_III	9496927	9500120	-	WBGene00004933	sod-4	cds
C18E9.10	4	2.49312	2.71961	2.76388	3.03333	2.7673	3.21786	2.84477	3.2739	3.45228	3.54901	1.05589	CHROMOSOME_II	8955175	8964087	-	WBGene00007690		cds
F44G4.4	4	3.08151	3.53373	3.45407	3.84189	3.71545	3.87415	3.79176	4.16995	4.48532	4.33357	1.4038	CHROMOSOME_II	8997765	8999663	+	WBGene00006514	tdp-1	cds
F49E8.5	4	4.18485	4.33705	3.85373	4.28678	4.11457	4.64231	4.51753	4.61308	4.90983	4.8762	1.0561	CHROMOSOME_IV	7551539	7552997	-	WBGene00000996	dif-1	cds
B0395.3	4	0	0.283709	0	0.346283	0	0.990982	0	0.793736	1.27105	1.27633	1.27633	CHROMOSOME_X	16034975	16039442	-	WBGene00007175		cds
C23F12.4	4	0	0	0	0	0.357971	1.4278	0	1.35238	1.94784	1.6977	1.94784	CHROMOSOME_X	9387377	9389130	+	WBGene00016009		cds
M04G12.1	4	0	0	0	0	0.612866	1.06369	0	0.863753	1.75105	1.48288	1.75105	CHROMOSOME_V	13370091	13380176	-	WBGene00010867	tag-260	cds
F52E1.9	4	0	0	0	0.210329	0.146475	0.611658	0	0.863753	1.27726	1.13609	1.27726	CHROMOSOME_V	8398147	8399328	-	WBGene00018697		cds
Y53C12A.4	4	2.91983	2.84551	2.819	2.75843	3.10768	3.18508	2.52484	3.42071	3.58149	3.45359	1.05664	CHROMOSOME_II	9701353	9703673	-	WBGene00013140		cds
C14C10.6	4	0.748353	0.859132	1.13716	1.08933	0.917501	1.50127	0.966147	1.75407	1.75105	1.914	1.16565	CHROMOSOME_V	12607393	12608090	+	WBGene00007589		cds
F40F4.4	4	0	0	0.631163	0.514232	0.649161	1.35038	0.560897	2.22274	2.26622	2.31318	2.31318	CHROMOSOME_X	3256998	3258146	+	WBGene00002255	lbp-3	cds
M03A8.2	4	0	0	0.631163	0	0.19006	0.73862	0	1.79048	1.75105	1.85602	1.85602	CHROMOSOME_X	6809065	6817593	+	WBGene00019748	atg-2	cds
C14F5.4	4	0	0	0	0	0.508361	1.1126	0	2.03796	2.11059	1.85602	2.11059	CHROMOSOME_X	7956147	7958261	-	WBGene00015777	sfxn-2	cds
F56H9.2	4	0	0.283709	0.217437	0	0.508361	1.18184	0.560897	2.00735	1.75105	1.59429	2.00735	CHROMOSOME_V	12637643	12638220	+	WBGene00010174		cds
T24H10.3	4	4.82707	5.18268	5.08593	5.06463	5.49479	5.64195	4.97488	6.09406	5.86348	6.05547	1.26699	CHROMOSOME_II	9107319	9108502	-	WBGene00001041	dnj-23	cds
C48A7.1	4	0	0.283709	0.217437	0	0	0.937693	0	1.79048	0.965436	1.27633	1.79048	CHROMOSOME_IV	7405449	7418722	+	WBGene00001187	egl-19	cds
F01G12.2	4	0	0.52069	0.217437	0.5356	0.357971	1.98515	0.560897	2.715	2.12443	2.17556	2.715	CHROMOSOME_X	16376521	16379978	+	WBGene00006353	sur-7	cds
F52F12.6	4	0	0	0	0	0	0.963258	0	1.30282	0.965436	0.924125	1.30282	CHROMOSOME_I	9904294	9910536	-	WBGene00009939	ztf-11	cds
F53E10.1	4	0	0	0	0	0	1.18184	0	1.40028	0.973102	0.980726	1.40028	CHROMOSOME_V	2615788	2618552	+	WBGene00018758		cds
F49E7.1	4	0	0	0	0	0.508361	1.50127	0	2.06793	1.28959	1.94278	2.06793	CHROMOSOME_X	1097149	1103317	+	WBGene00004377	rme-6	cds
F18G5.6	4	0	0	0.47108	0.346283	0.513436	1.1126	0	2.00735	1.94784	1.27633	2.00735	CHROMOSOME_X	9262000	9264274	-	WBGene00017582		cds
T28B11.1	4	0	0	0.631163	0.645124	0.47351	0.937693	0	1.97608	1.52832	1.08537	1.97608	CHROMOSOME_V	10712670	10732402	-	WBGene00012117		cds
M60.4	4	0	0	0	0.210329	0.19006	0.708702	0	2.03796	1.53351	1.08537	2.03796	CHROMOSOME_X	8232203	8236265	-	WBGene00019780		cds
B0304.5	4	0	0	0	0	0	0	0	1.35238	0.55692	1.13609	1.35238	CHROMOSOME_II	4529633	4531961	-	WBGene00005058	sra-32	cds
M03A8.4	4	0	0	0.217437	0	0.19006	0.189748	0	2.00735	1.27105	1.55921	2.00735	CHROMOSOME_X	6819967	6823231	-	WBGene00001572	gei-15	cds
T13H5.1	4	0	0	0	0	0	0	0	1.40028	0.965436	1.13609	1.40028	CHROMOSOME_II	8487318	8508914	-	WBGene00011755		cds
F42E11.4	4	0	0	0.290991	0.5356	0.279439	0.189748	0.963749	3.13202	2.2631	2.92407	3.13202	CHROMOSOME_X	11375816	11377406	-	WBGene00006584	tni-1	cds
F07A5.7	4	1.23863	0	0.47108	0.183506	0.612866	0.911667	0.966147	3.65613	3.10789	3.27578	3.65613	CHROMOSOME_I	7376601	7383194	-	WBGene00006754	unc-15	cds
F40H6.4	4	0.748353	0	0.406354	0.370268	0.580478	0.827736	0.966147	2.24914	2.11059	2.35564	2.35564	CHROMOSOME_III	6045610	6046855	-	WBGene00006547	tbx-11	cds
C05B5.4	4	0	0	0	0	0	0	0	1.30282	0.567086	1.55921	1.55921	CHROMOSOME_III	9993796	9996146	+	WBGene00007321		cds
C25E10.8	4	0	0	0	0	0.146475	0.357416	0	1.35238	0.567086	1.88596	1.88596	CHROMOSOME_V	9053295	9053995	-	WBGene00016097		cds
F02C12.1	4	0	0	0.217437	0	0.146475	0.189748	0	0.793736	0.55692	1.13609	1.13609	CHROMOSOME_X	13402024	13406347	+	WBGene00008515		cds
F59C12.3	4	0	0	0	0	0	0.990982	0	1.75407	1.27726	1.82544	1.82544	CHROMOSOME_X	16603313	16609451	-	WBGene00019102		cds
R11.4	4	0	0	0	0	0	0.318328	0	0.863753	0.55692	1.08537	1.08537	CHROMOSOME_X	16210248	16210578	-	WBGene00011229		cds
C04C11.2	4	0.748353	0.463942	0.217437	0	0.19006	1.03986	1.28024	2.715	0.965436	2.69254	2.715	CHROMOSOME_X	14033725	14037364	+	WBGene00007296	arrd-25	cds
F36G3.2	4	0	0.283709	0	0.183506	0.279439	0.472435	0.560897	1.40028	0.55692	1.7956	1.7956	CHROMOSOME_X	9792351	9794215	-	WBGene00009483		cds
C06A12.3	4	0	0	0	0	0	0.189748	0	0.793736	0.973102	1.44495	1.44495	CHROMOSOME_IV	17427680	17429566	+	WBGene00007357		cds
F54E4.3	4	0	0	0	0	0	0	0	0.793736	0.957729	1.32086	1.32086	CHROMOSOME_X	14632023	14636352	-	WBGene00010059		cds
F58G4.1	4	0	0	0	0	0	0	0	1.30282	1.76436	2.41754	2.41754	CHROMOSOME_V	8109031	8118110	+	WBGene00019064	myo-5	cds
F29B9.8	4	0.748353	0.283709	0.631163	0.556656	0.357971	0.827736	0.966147	2.32557	2.74982	3.21862	2.93491	CHROMOSOME_IV	4647194	4649732	+	WBGene00017923		cds
T25F10.6	4	0	0	0.406354	0.183506	0.437796	0.189748	0.963749	2.85066	3.84587	4.32315	4.32315	CHROMOSOME_V	6765543	6768715	-	WBGene00020808		cds
C44B7.5	4	0	1.9939	0.217437	0.210329	0.68006	0.357416	0	4.61317	7.60348	8.85791	8.85791	CHROMOSOME_II	6871333	6872550	-	WBGene00016627		cds
T23C6.4	4	0	0.283709	0.217437	0.210329	0.19006	0.318328	0	0.793736	1.28344	1.44495	1.44495	CHROMOSOME_X	17147457	17149853	-	WBGene00020726		cds
F35C5.2	4	0	0	0	0	0	0	0	0.793736	1.54385	1.55921	1.55921	CHROMOSOME_II	12885207	12888537	+	WBGene00005040	sra-14	cds
F40E10.3	4	0	0	0	0	0	0	0	0.863753	1.53869	1.55921	1.55921	CHROMOSOME_X	14684806	14688296	+	WBGene00000822	csq-1	cds
F01G10.8	4	0	0	0	0.183506	0.146475	0.472435	0	0.793736	1.75105	1.6977	1.75105	CHROMOSOME_IV	10250624	10255822	+	WBGene00000910	daf-14	cds
H06I04.6	4	0	0	0	0.183506	0.319239	0.189748	0	0.793736	1.54899	1.32086	1.54899	CHROMOSOME_III	3061183	3064320	-	WBGene00019170		cds
C36E6.3	4	0	0	0	0.210329	0	0.799629	0.560897	1.35238	2.25683	2.78937	2.78937	CHROMOSOME_X	17459086	17460693	+	WBGene00003369	mlc-1	cds
F56A11.3	4	0	0	0	0	0	0.73862	0.560897	1.30282	2.12443	3.1109	3.1109	CHROMOSOME_IV	559238	568076	+	WBGene00001165	efn-4	cds
T28C6.7	4	0	0	0.406354	0	0.19006	0.73862	0.560897	1.35238	1.76436	2.55269	2.55269	CHROMOSOME_IV	8827791	8840669	+	WBGene00012121		cds
F08B6.4	4	0.748353	0.902484	0.290991	0.514232	0.401176	1.30901	1.28024	2.50079	2.52689	3.28655	2.99555	CHROMOSOME_I	6761229	6767800	-	WBGene00006819	unc-87	cds
F54C1.7	4	1.0899	0.982532	0.631163	0.210329	0.649161	0	0	3.56964	3.74137	4.34978	4.34978	CHROMOSOME_I	5018770	5020166	-	WBGene00003934	pat-10	cds
C24A3.2	4	0.748353	0	0.47108	0.210329	0.773209	0.472435	0	1.30282	1.95172	2.80513	2.80513	CHROMOSOME_X	8997424	8998854	+	WBGene00016033		cds
C13G3.1	4	0	0	0	0.645124	0.19006	0.318328	0.560897	0.793736	1.54385	1.99866	1.99866	CHROMOSOME_V	11011425	11012444	-	WBGene00007553		cds
T06C10.4	4	0.748353	0.52069	1.18908	1.30039	0.714723	1.01563	1.53804	2.00735	2.40669	3.41395	2.89326	CHROMOSOME_IV	7868893	7870063	+	WBGene00001453	flp-10	cds
C41A3.2	4	0	0	0.406354	0.210329	0.47351	0.318328	0.560897	0.863753	0.973102	1.55921	1.55921	CHROMOSOME_X	5406529	5414318	-	WBGene00016559		cds
F08G2.4	4	0.645513	0.675026	0.217437	0.664651	0.437796	0.611658	0.966147	0.793736	1.53869	2.29096	2.07353	CHROMOSOME_II	13830530	13831152	+	WBGene00008576		cds
M04F3.1	4	5.45838	5.45855	5.1877	5.1624	5.45064	5.57306	5.68485	5.53315	5.94395	6.16474	1.00234	CHROMOSOME_I	4769695	4771362	+	WBGene00019767	rpa-2	cds
F53B1.8	4	0.645513	0.814436	0	0	0	0.318328	0.560897	1.35238	1.53869	2.5339	2.5339	CHROMOSOME_X	2123411	2130235	-	WBGene00018739		cds
F31C3.1	4	4.07275	4.03124	4.09909	3.25975	3.51617	4.44707	4.18078	5.02802	5.18315	4.93761	1.92339	CHROMOSOME_I	15040416	15041270	-	WBGene00000881	cyn-5	cds
ZC410.5	4	1.16618	1.26938	0.631163	0.183506	0.68006	1.6219	2.26446	3.69995	3.46185	3.14679	3.51644	CHROMOSOME_IV	9088596	9092180	+	WBGene00013882		cds
T08B2.7	4	3.93075	3.6062	3.82492	3.30938	3.68743	3.82749	3.9776	4.14205	4.52059	4.61925	1.30987	CHROMOSOME_I	6206956	6211157	-	WBGene00020347		cds
T22B11.5	4	4.28887	3.80403	4.24248	4.27195	3.88253	4.10123	4.21784	4.59775	4.8461	4.74548	1.04207	CHROMOSOME_IV	4696827	4704005	-	WBGene00020679	ogdh-1	cds
B0334.2	4	0	0.283709	0	0.39386	0.744262	0.472435	1.27832	1.75407	2.2631	0.742567	2.2631	CHROMOSOME_II	11483137	11485295	-	WBGene00006660	twk-5	cds
Y105C5B.28	4	0.645513	0.675026	0.982581	2.0371	1.71062	1.26857	2.52728	3.87552	3.92761	1.85602	3.2821	CHROMOSOME_IV	16167751	16170794	-	WBGene00001604	gln-3	cds
B0361.3	4	3.13943	3.15674	2.76388	3.21168	3.68037	3.39711	3.578	4.37882	4.22673	3.28655	1.61494	CHROMOSOME_III	7281340	7283892	+	WBGene00015157		cds
C04E6.7	4	0	0	0	0.210329	0	0	0	1.30282	1.76877	0.806592	1.76877	CHROMOSOME_V	5893300	5895192	+	WBGene00015423		cds
F54E2.3	4	0	0	0	0	0	0	0	0.863753	1.54385	0.806592	1.54385	CHROMOSOME_V	2781481	2801025	-	WBGene00004130	ketn-1	cds
W02A2.2	4	0	0	0	0	0	0	0	0.793736	1.27726	0.534825	1.27726	CHROMOSOME_IV	13328335	13329295	+	WBGene00001390	far-6	cds
K07C11.5	4	0	0	0	0	0	0.189748	0	0.863753	1.28344	0.806592	1.28344	CHROMOSOME_V	8201788	8202541	+	WBGene00019478	cri-2	cds
ZK822.2	4	0	0.283709	0.217437	0.183506	0	0.189748	0.560897	1.75407	2.64985	1.94278	2.64985	CHROMOSOME_IV	11922335	11923171	-	WBGene00014090		cds
F07C3.7	4	0	0	0.217437	0	0.146475	0.318328	0.560897	1.71672	1.94394	1.44495	1.94394	CHROMOSOME_V	9244389	9246337	-	WBGene00000003	aat-2	cds
Y53F4B.30	4	0	0	0	0.183506	0.279439	0	0.560897	2.03796	2.12443	1.40414	2.12443	CHROMOSOME_II	15164809	15165650	-	WBGene00001775	gst-27	cds
E02A10.3	4	0	0.52069	0.217437	0.183506	0.19006	0.189748	0	1.35238	1.54385	0.980726	1.54385	CHROMOSOME_V	12583817	12587979	+	WBGene00008453		cds
ZC449.8	4	0	0	0.573373	1.05475	0.279439	0.911667	0.963749	2.24914	3.18135	2.02461	3.18135	CHROMOSOME_X	5016042	5017791	+	WBGene00195189		cds
C09B7.1	4	0	0	0	0	0	0.318328	0.560897	1.71672	1.27105	0.534825	1.71672	CHROMOSOME_X	2673463	2682353	+	WBGene00004780	ser-7	cds
W04A8.5	4	0	0.283709	0	0	0	0.318328	0.560897	2.0973	1.7555	0.924125	2.0973	CHROMOSOME_I	13849606	13850856	-	WBGene00012240		cds
F33C8.3	4	0	0	0	0	0	0	0.560897	1.67837	1.27726	0.292055	1.67837	CHROMOSOME_X	14726556	14729412	-	WBGene00006634	tsp-8	cds
F20B6.3	4	0	0	0.47108	0.346283	0	0.318328	0.560897	1.79048	1.75994	0.742567	1.79048	CHROMOSOME_X	4178037	4186423	-	WBGene00003412	mrp-6	cds
C14B1.1	4	5.60967	5.72419	5.6602	5.57541	5.55104	5.88296	5.8834	6.35206	6.56233	6.03701	1.01129	CHROMOSOME_III	3699701	3701458	-	WBGene00003962	pdi-1	cds
C16B8.4	4	0	0.283709	0	0.370268	0.146475	0	0	1.30282	1.52832	0.292055	1.52832	CHROMOSOME_X	3970369	3973614	-	WBGene00015824		cds
W06H8.8	4	0	0	0	0	0.146475	0	0	1.35238	1.27726	0	1.35238	CHROMOSOME_V	6120892	6202609	-	WBGene00006436	ttn-1	cds
F08B12.1	4	0	0	0	0	0	0	0	0.793736	1.54385	0.292055	1.54385	CHROMOSOME_X	11385051	11392715	+	WBGene00008571		cds
R03E9.3	4	0	0	0.217437	0	0.146475	0	0	1.30282	1.93612	0.292055	1.93612	CHROMOSOME_X	6747267	6761699	-	WBGene00019844	abts-4	cds
C49F5.2	4	0	0	0	0	0	0.611658	0	0.793736	1.53869	0.742567	1.53869	CHROMOSOME_X	11969962	11974608	-	WBGene00008206	set-6	cds
F57C12.5	4	0	0	0	0.183506	0.146475	0.472435	0	0.793736	1.28959	0.292055	1.28959	CHROMOSOME_X	576319	587483	-	WBGene00003407	mrp-1	cds
M18.2	4	0	0	0	0	0.319239	0.73862	0	1.71672	1.76436	0.534825	1.76436	CHROMOSOME_IV	12110565	12111555	-	WBGene00010888	dlc-2	cds
Y2H9A.1	4	3.36085	3.10335	3.35445	3.13865	3.58957	3.6086	3.3955	4.00525	4.2571	3.70608	1.15375	CHROMOSOME_V	13433040	13437533	-	WBGene00003222	mes-4	cds
Y53F4B.29	4	0	0	0	0.210329	0.612866	0.578957	0.560897	1.40028	1.76436	0.742567	1.76436	CHROMOSOME_II	15163732	15164508	-	WBGene00001774	gst-26	cds
D2092.4	4	0	0.675026	0.631163	0.556656	0.19006	0.472435	0.560897	1.35238	1.28344	0.806592	1.35238	CHROMOSOME_I	6612188	6615979	-	WBGene00017065		cds
C04F6.3	4	0	0.283709	1.51103	0.370268	0.801587	0.827736	1.27832	2.27507	2.53468	1.99744	2.53468	CHROMOSOME_X	3397594	3400007	-	WBGene00000503	cht-1	cds
Y57A10A.13	4	2.05943	2.08942	2.65631	2.16665	2.33362	2.62616	2.52484	3.20813	3.1863	2.65825	1.1487	CHROMOSOME_II	12176816	12184808	-	WBGene00013256		cds
Y73B6BL.12	4	0	0.52069	0.952304	0	0.357971	0.708702	0.560897	0.793736	1.28344	0.980726	1.28344	CHROMOSOME_IV	6317036	6321346	-	WBGene00022236		cds
C31C9.2	4	0	0	0.723047	0	0.19006	0.708702	0	0.793736	1.94784	1.40414	1.94784	CHROMOSOME_II	13636913	13638415	-	WBGene00007836		cds
Y59E9AL.7	4	3.27935	3.6062	3.88554	3.57354	3.6213	3.72426	3.57918	3.66596	4.38913	4.1928	1.10978	CHROMOSOME_IV	5209493	5210606	+	WBGene00043064	nbet-1	cds
H17B01.4	4	4.05397	4.40857	4.41031	4.3016	4.26828	4.3726	4.10285	4.77645	5.08422	5.00972	1.03025	CHROMOSOME_II	1489937	1500338	-	WBGene00019209		cds
Y63D3A.4	4	2.05943	2.53033	2.67944	2.60101	2.45735	2.627	2.26446	3.08882	3.45912	3.42374	1.39969	CHROMOSOME_I	14097543	14101071	-	WBGene00013405		cds
AH6.5	4	2.24261	2.87687	3.54219	4.38277	5.59298	5.46467	5.37372	5.23721	5.60416	5.74253	3.49993	CHROMOSOME_II	9524113	9526307	+	WBGene00003231	mex-6	cds
Y51F10.10	4	1.80254	2.03344	2.53023	2.75388	3.48021	3.48192	3.45922	3.16012	3.57772	3.62968	1.82714	CHROMOSOME_I	1950600	1958514	-	WBGene00021771		cds
F29F11.1	4	1.54797	2.60809	2.86005	3.43074	5.26811	5.03973	4.99725	4.72795	5.23582	5.65964	4.11168	CHROMOSOME_V	10659610	10661448	-	WBGene00005022	sqv-4	cds
W02F12.3	4	1.84957	3.03823	3.35424	3.79231	5.06442	5.3254	5.42271	4.52389	5.54072	5.57807	3.72851	CHROMOSOME_V	6703040	6704558	+	WBGene00020948		cds
B0365.1	4	3.68677	4.3823	4.69693	4.68042	5.25179	5.50411	5.35618	5.389	5.57814	5.94574	2.25897	CHROMOSOME_V	13116488	13120120	+	WBGene00007150		cds
F14B4.2	4	3.68677	4.75988	5.14935	5.39291	6.13739	6.23528	6.40557	6.16341	6.72537	6.78421	3.09744	CHROMOSOME_I	9271436	9278681	-	WBGene00008780		cds
F32D1.10	4	4.51291	5.04718	5.34091	5.5764	6.02879	6.08704	6.322	6.11036	6.33426	6.399	1.88609	CHROMOSOME_V	4347150	4349761	+	WBGene00003159	mcm-7	cds
F26D10.10	4	3.438	3.9931	4.85435	4.99525	5.85283	6.13895	6.54415	6.20872	6.47928	6.65743	3.21944	CHROMOSOME_IV	17272194	17273615	-	WBGene00001606	gln-5	cds
F25B5.4	4	5.79703	6.01774	6.29682	6.36896	6.66375	6.6477	6.73061	6.71821	6.94095	6.98682	1.18979	CHROMOSOME_III	5940197	5943791	+	WBGene00006727	ubq-1	cds
C36B1.12	4	1.75393	2.91894	4.14457	3.76296	5.42293	5.5475	5.55953	5.95648	5.87024	5.85513	4.20255	CHROMOSOME_I	8752228	8755672	+	WBGene00007979	imp-1	cds
F38E1.7	4	1.16618	2.52932	3.91695	3.89265	4.99906	5.62461	5.32278	5.44583	5.46852	5.81536	4.64918	CHROMOSOME_V	8355968	8358168	+	WBGene00003395	mom-2	cds
T01H8.1	4	2.40512	3.20885	3.88138	3.99104	5.20927	5.69209	5.32336	5.41261	5.18066	5.73666	3.33154	CHROMOSOME_I	8573845	8580151	-	WBGene00011352	rskn-1	cds
T23G11.2	4	1.48978	2.62113	3.2626	3.9484	5.28817	5.7188	5.28799	5.6205	5.37624	5.70589	4.22902	CHROMOSOME_I	7699539	7700958	+	WBGene00001647	gna-2	cds
Y45F10C.3	4	3.40689	4.0123	4.46049	4.47503	5.34857	5.4736	5.27094	5.15746	5.40152	5.4479	2.0667	CHROMOSOME_IV	13665320	13666887	-	WBGene00012879	fbxa-215	cds
C09G9.6	4	4.17674	5.35259	5.63451	5.84757	6.35536	6.40809	6.43762	6.64732	6.88069	6.83155	2.70395	CHROMOSOME_IV	8888960	8890843	+	WBGene00003864	oma-1	cds
F23C8.4	4	4.28032	4.88688	5.13612	5.42652	5.6696	5.55929	5.63044	5.75797	5.8339	5.98197	1.70165	CHROMOSOME_I	2434006	2435711	+	WBGene00017733	ubxn-1	cds
W06B4.1	4	3.00294	3.96781	4.36399	4.94467	5.48871	5.67107	5.42282	5.4783	5.86064	6.0601	3.05717	CHROMOSOME_II	4471401	4473745	+	WBGene00021056		cds
F07A11.2	4	3.59478	4.85749	5.39206	6.112	6.66925	6.76491	6.99003	7.21244	7.33712	7.40401	3.80923	CHROMOSOME_II	11592326	11596524	-	WBGene00008546		cds
Y105E8A.2	4	2.57934	3.20885	3.80403	4.04403	4.43561	4.51506	4.71316	4.85598	4.81749	4.97563	2.39628	CHROMOSOME_I	14347502	14358313	-	WBGene00013667		cds
F46E10.10	4	3.48168	4.37874	4.7427	5.277	5.8524	6.02759	5.94109	6.47678	6.37668	6.25365	2.9951	CHROMOSOME_V	6515259	6516511	-	WBGene00018491	mdh-1	cds
W03C9.7	4	3.78396	4.47952	5.10657	5.76181	6.47002	6.40635	6.46807	6.94785	6.66085	6.77246	3.16388	CHROMOSOME_II	11968573	11972285	+	WBGene00003228	mex-1	cds
Y73B6BL.38	4	4.10217	5.07044	5.59254	6.2468	6.76352	6.79752	6.78723	7.14764	6.94303	6.8437	3.04547	CHROMOSOME_IV	6421581	6423489	+	WBGene00022257	puf-11	cds
T22F3.3	4	3.04157	4.6106	4.7611	5.77759	6.59502	6.4142	6.81214	6.89859	6.97098	7.1832	4.14163	CHROMOSOME_V	3579044	3585042	+	WBGene00020696		cds
T25E12.5	4	2.27742	4.07858	4.16416	5.39271	6.41388	6.54856	6.48394	6.72705	6.69361	6.98076	4.70334	CHROMOSOME_V	16745085	16746240	-	WBGene00012020	gyg-2	cds
W02A2.7	4	3.99368	4.98176	5.16826	5.60798	6.36828	6.43722	6.44567	6.68108	6.631	6.68688	2.69321	CHROMOSOME_IV	13353692	13356065	+	WBGene00003230	mex-5	cds
C30B5.1	4	2.34461	3.27512	3.99248	4.11334	4.92534	4.65434	4.81426	4.89207	4.70797	4.79655	2.58073	CHROMOSOME_II	6198700	6201599	+	WBGene00016243	tag-319	cds
F18A11.1	4	3.02359	3.83111	4.42947	4.61062	5.37447	5.25464	5.23449	5.35598	5.23382	5.41582	2.39223	CHROMOSOME_II	13039720	13043406	-	WBGene00004242	puf-6	cds
H02I12.5	4	1.48978	2.87766	3.96844	4.13642	5.1229	4.91722	5.0812	4.72795	5.09844	4.98588	3.63312	CHROMOSOME_IV	11401926	11403315	-	WBGene00010353		cds
F22B3.4	4	3.67376	5.29438	5.99735	6.46262	6.98006	7.10393	7.05867	7.13573	7.3506	7.3507	3.67694	CHROMOSOME_IV	11410463	11412979	+	WBGene00009035		cds
F26H9.6	4	2.60698	3.7872	4.79436	5.03629	5.6692	5.7515	5.48485	5.92505	5.99789	5.89032	3.39091	CHROMOSOME_I	9308429	9310213	+	WBGene00004268	rab-5	cds
T11F8.3	4	2.43626	3.9627	5.59622	6.04037	6.62151	6.71145	6.55877	6.68473	6.78382	6.81511	4.37884	CHROMOSOME_IV	5469986	5473166	+	WBGene00004374	rme-2	cds
K08E3.5	4	2.43626	3.19211	4.37534	4.79431	5.57106	5.45759	5.34027	5.36506	5.75272	5.78659	3.35033	CHROMOSOME_III	13763963	13767993	-	WBGene00010665		cds
T05B11.3	4	3.67223	4.11982	4.7459	5.01734	5.26759	5.36726	5.27082	5.46991	5.43887	5.54655	1.87433	CHROMOSOME_V	7733604	7734892	-	WBGene00020246	clic-1	cds
Y45F10A.2	4	3.59478	4.60733	5.55371	6.2254	6.85606	6.9666	6.74932	7.26358	7.21222	7.27114	3.67636	CHROMOSOME_IV	13510282	13512144	-	WBGene00004239	puf-3	cds
C33H5.19	4	2.87508	3.85337	4.64756	4.67649	4.89787	5.27754	5.87238	5.47414	5.80685	5.67678	2.9973	CHROMOSOME_IV	7782586	7783841	-	WBGene00044325	tag-321	cds
F42A8.3	4	2.52244	3.01938	3.55475	3.47793	3.85622	3.83097	4.21859	4.09902	4.13952	4.10089	1.69615	CHROMOSOME_II	9352939	9354270	+	WBGene00009627		cds
Y110A2AR.1	4	4.22107	4.64541	5.3337	5.37288	5.69402	5.73192	5.96279	5.89085	6.12234	5.99554	1.90127	CHROMOSOME_II	2919719	2920850	+	WBGene00022452		cds
Y43E12A.1	4	3.58091	4.28915	5.14681	5.38751	6.04872	6.13348	6.55193	6.41685	6.65188	6.54375	3.07096	CHROMOSOME_IV	10985964	10987405	+	WBGene00000866		cds
H21P03.3	4	2.40512	2.8447	3.58193	3.75986	3.99794	4.00282	4.5165	4.10993	4.68582	4.4418	2.28069	CHROMOSOME_IV	11482647	11498145	-	WBGene00004892	sms-1	cds
F52A8.1	4	3.66064	4.06025	4.76546	4.52773	5.00517	5.10229	5.40598	5.18855	5.77498	5.46547	2.11434	CHROMOSOME_I	7317642	7318657	+	WBGene00009915		cds
F47D12.9	4	4.08378	4.36387	4.79223	4.96817	4.90279	5.22401	5.4703	5.29387	5.32292	5.4308	1.38652	CHROMOSOME_III	6299279	6303167	-	WBGene00018564		cds
F37C12.2	4	2.55117	2.62207	3.57697	3.24037	3.75238	3.76594	3.88719	3.80609	4.0978	4.1262	1.57503	CHROMOSOME_III	7181929	7184374	+	WBGene00018150	epg-4	cds
F58E10.4	4	2.4966	2.8447	3.5497	3.8187	3.96022	4.43955	4.2897	4.19053	4.57612	4.4616	2.07951	CHROMOSOME_V	14012318	14013629	+	WBGene00000097	aip-1	cds
ZK973.11	4	2.80523	3.09471	3.64184	3.67465	3.8682	4.01846	3.93341	3.75625	4.17841	4.2562	1.45097	CHROMOSOME_I	4379321	4381899	-	WBGene00022836		cds
B0244.8	4	3.39296	3.72863	5.34874	5.90957	6.74306	6.85087	7.29097	7.13664	7.31983	6.97812	3.92688	CHROMOSOME_III	5728132	5730348	+	WBGene00015083	egg-1	cds
T24D1.3	4	2.55117	2.71961	3.85145	4.68413	5.64182	5.57699	5.98512	5.57027	6.05628	5.67659	3.5051	CHROMOSOME_I	9958771	9960145	-	WBGene00011986		cds
K01C8.3	4	2.80803	3.09471	4.16757	5.21181	6.06262	6.06516	6.09999	6.40737	6.40066	6.16772	3.59934	CHROMOSOME_II	8270517	8273533	+	WBGene00006562	tdc-1	cds
F54C9.8	4	2.60698	3.39863	4.67633	5.79002	6.56033	6.89083	6.73052	6.77614	6.99025	7.20014	4.59316	CHROMOSOME_II	8575490	8577671	+	WBGene00004241	puf-5	cds
H31G24.4	4	3.32802	3.80891	4.93787	5.38751	6.02158	6.0841	6.26941	6.29451	6.55224	6.59945	3.27143	CHROMOSOME_I	4114736	4116371	+	WBGene00000867		cds
Y55F3AL.1	4	1.0899	1.30212	1.84052	2.28552	2.45735	2.73052	2.84542	2.8678	2.94482	2.93779	1.85492	CHROMOSOME_IV	959452	984392	+	WBGene00004047	plx-1	cds
C25A1.8	4	2.43626	3.0095	5.28092	6.64093	7.1314	7.44869	7.9654	8.10346	7.88772	7.63096	5.66719	CHROMOSOME_I	10184234	10185458	-	WBGene00007709	clec-87	cds
F43D9.4	4	3.89889	4.10665	6.01367	7.37066	7.54323	7.93979	8.47595	8.72786	8.48917	8.52913	4.82897	CHROMOSOME_III	10506008	10506703	-	WBGene00004798	sip-1	cds
K10B2.1	4	4.1664	4.18583	4.7503	5.10011	5.21192	5.28529	5.46956	5.56898	5.48647	5.31897	1.40258	CHROMOSOME_II	6371273	6374502	+	WBGene00003009	lin-23	cds
C27A2.3	4	4.43116	4.41206	4.93515	5.14623	5.31957	5.35848	5.42249	5.59752	5.4524	5.60072	1.18867	CHROMOSOME_II	5054081	5055327	-	WBGene00002068	ify-1	cds
F35C11.5	4	3.19297	3.69293	4.59017	5.08322	5.7919	5.97052	5.90699	6.46205	6.36557	5.83425	3.26909	CHROMOSOME_II	8252085	8255272	+	WBGene00009404		cds
B0280.5	4	4.93746	5.14272	6.64196	7.31629	7.541	7.86779	8.71213	8.72728	8.6865	8.40443	3.78981	CHROMOSOME_III	7102024	7103930	-	WBGene00015102	cpg-2	cds
C07G2.1	4	4.91	5.52528	6.89929	7.47372	7.71504	7.98483	8.90222	9.09541	8.97413	8.51751	4.18541	CHROMOSOME_III	4489326	4491365	+	WBGene00000465	cpg-1	cds
F52E1.1	4	4.6177	5.04199	5.96285	6.89082	7.42956	7.79542	8.46026	8.76611	8.50661	8.28143	4.14841	CHROMOSOME_V	8414065	8415235	+	WBGene00004078	pos-1	cds
Y25C1A.7	4	3.79602	4.06433	4.31645	4.64399	4.78398	4.9192	5.19773	5.29387	5.08157	5.05252	1.49785	CHROMOSOME_II	3062543	3071384	-	WBGene00021294		cds
F26A3.8	4	2.20693	2.55672	3.35445	3.92761	4.11656	3.91178	4.02018	4.32399	4.18255	4.29019	2.11706	CHROMOSOME_I	7643426	7649773	-	WBGene00004508	rrf-1	cds
T07F8.3	4	2.98199	2.9197	4.18057	4.6653	5.15685	4.92734	5.21579	5.2055	4.97229	5.26105	2.34135	CHROMOSOME_II	7132601	7137175	+	WBGene00001597	gld-3	cds
T25G3.2	4	3.15603	3.57353	4.66253	4.98248	5.46919	5.52684	5.71197	5.78533	5.39537	5.66407	2.6293	CHROMOSOME_I	7554888	7559912	+	WBGene00000496	chs-1	cds
F57H12.1	4	3.438	3.50589	4.53948	4.77423	4.74114	4.63197	4.99666	5.06753	5.19969	5.12267	1.76169	CHROMOSOME_IV	7982512	7983888	+	WBGene00000183	arf-3	cds
F44F4.2	4	3.08151	3.16566	4.61078	4.93392	5.75611	5.79715	5.54532	5.58202	5.83863	5.94381	2.86229	CHROMOSOME_II	10882347	10884402	-	WBGene00009701	egg-3	cds
T05C12.6	4	3.63402	3.49935	4.17415	4.30726	4.5405	4.6445	4.51691	4.59775	4.73937	4.84258	1.34322	CHROMOSOME_II	8182269	8184971	-	WBGene00003241	mig-5	cds
R05F9.6	4	3.17244	3.3614	4.14964	4.95885	5.74113	5.49952	5.17828	5.4783	5.57531	5.86088	2.68844	CHROMOSOME_II	4889430	4891464	+	WBGene00019890		cds
T19B10.8	4	2.73478	2.70833	3.70173	3.72836	4.40785	4.41794	3.9776	4.44323	4.63805	4.48069	1.92972	CHROMOSOME_V	11241885	11244712	+	WBGene00011835		cds
Y37E11B.3	4	2.46675	2.64685	3.09097	3.10331	3.51617	3.50523	3.10755	3.53787	3.51964	3.54859	1.08184	CHROMOSOME_IV	3580964	3582904	-	WBGene00021376		cds
R74.5	4	2.37329	2.2126	3.12481	3.15161	3.55125	3.81035	3.39461	3.73773	3.3931	3.70608	1.59776	CHROMOSOME_III	4197257	4202263	+	WBGene00011279	asd-1	cds
C32D5.3	4	1.84957	2.26215	2.67016	3.23918	3.44134	3.8493	3.6343	3.56964	3.39453	3.59384	1.99973	CHROMOSOME_II	6318054	6321127	-	WBGene00016311		cds
Y39E4B.5	4	2.63093	3.15674	3.91492	4.1538	4.89201	5.13994	5.17906	4.92936	4.84087	4.6879	2.54813	CHROMOSOME_III	13169817	13173005	+	WBGene00012716		cds
K05C4.6	4	3.00294	3.41314	4.04511	4.04454	4.47178	4.66688	4.39165	4.36988	4.25239	4.52376	1.66394	CHROMOSOME_I	14738871	14742655	+	WBGene00001979	hmp-2	cds
Y39G10AR.32	4	0.748353	1.30212	2.55022	2.68339	3.22095	3.62912	3.68993	3.10336	3.18465	3.52066	2.94157	CHROMOSOME_I	2322027	2322598	-	WBGene00219275		cds
ZK858.6	4	3.40874	3.93763	4.66849	4.64801	4.86383	5.17159	5.17867	5.04511	4.88653	4.97879	1.76993	CHROMOSOME_I	9138260	9145625	-	WBGene00014119		cds
T24D1.1	4	2.85217	3.36084	4.94743	4.74106	5.36983	5.62393	5.25271	5.40969	5.47562	5.28066	2.77176	CHROMOSOME_I	9947796	9953341	+	WBGene00005023	sqv-5	cds
R12B2.4	4	2.73478	3.20885	3.76133	3.73384	4.34472	4.0703	4.25446	4.1455	4.05935	4.01076	1.60994	CHROMOSOME_III	5803215	5805205	+	WBGene00001869	him-10	cds
F27D4.2	4	2.57934	3.31461	3.56738	4.09775	4.43787	4.54988	4.6601	4.10993	4.35998	4.4616	2.08076	CHROMOSOME_I	7704568	7707052	-	WBGene00009188	lsy-22	cds
F29D10.4	4	1.70362	2.26215	2.99466	3.54557	3.87155	3.92519	4.32527	3.66596	4.06474	3.46311	2.62164	CHROMOSOME_I	8845800	8851111	-	WBGene00002035	hum-1	cds
T01C3.1	4	1.97712	2.60904	3.4325	3.59151	3.95696	4.03156	4.2897	3.72837	4.14292	4.031	2.31258	CHROMOSOME_V	14987534	14991007	-	WBGene00011318	cdt-2	cds
T22D1.5	4	3.63402	4.12374	4.98967	5.39544	5.86983	5.71381	6.04942	5.48251	5.86039	5.75255	2.41539	CHROMOSOME_IV	6903937	6905535	+	WBGene00020684		cds
Y54E5B.4	4	3.19297	3.77018	4.18709	4.5076	4.67026	4.99965	5.12061	4.27016	4.92882	4.66256	1.92764	CHROMOSOME_I	14822037	14823987	+	WBGene00006711	ubc-16	cds
C08B11.1	4	1.97712	3.43545	4.13972	4.62904	5.38254	5.48316	6.06949	6.13006	5.47225	5.90302	4.15294	CHROMOSOME_II	8017629	8020708	+	WBGene00006996	zyg-11	cds
F55C5.4	4	2.49312	3.31461	3.4323	3.6286	4.01319	4.36277	4.60406	4.62577	4.14207	4.49069	2.13265	CHROMOSOME_V	12271865	12275644	+	WBGene00010093	capg-2	cds
C27F2.8	4	2.20693	3.08534	3.51174	3.44313	3.9497	4.29737	4.21784	4.44323	4.14462	4.47151	2.26457	CHROMOSOME_III	4991392	4998126	-	WBGene00016170		cds
Y46H3A.6	4	1.48978	2.97003	3.80388	3.60949	4.20851	4.69636	4.54615	4.96766	4.35998	4.91979	3.47787	CHROMOSOME_V	1815851	1821322	-	WBGene00001632	gly-7	cds
C12D8.10	4	4.11071	4.96122	5.19491	5.3234	5.77726	5.7822	5.72455	6.34208	5.69735	5.96461	2.23137	CHROMOSOME_V	10248880	10252870	+	WBGene00000102	akt-1	cds
F57B10.1	4	2.09889	3.56681	3.84338	4.15317	4.73326	4.68852	4.93153	5.55447	5.1259	5.33805	3.45558	CHROMOSOME_I	6574003	6585176	+	WBGene00002783	let-607	cds
T08G5.5	4	3.4533	4.19426	4.39798	4.3453	4.80119	4.91756	5.13991	5.46146	5.08467	5.12553	2.00816	CHROMOSOME_V	14034320	14038357	-	WBGene00011625	vps-39	cds
C50C3.8	4	4.60244	5.1822	5.16416	5.17592	5.72071	5.60877	5.64468	5.94034	5.67239	5.68494	1.3379	CHROMOSOME_III	8161384	8163320	-	WBGene00016803	bath-42	cds
C26C6.1	4	4.16749	4.90278	5.079	5.05045	5.48871	5.43331	5.46977	5.56765	5.48446	5.87555	1.70806	CHROMOSOME_I	7495433	7503574	+	WBGene00007042	pbrm-1	cds
Y48E1B.12	4	3.27935	3.91664	4.23621	4.12572	4.71549	4.72937	4.54655	4.84737	4.5531	5.13789	1.85853	CHROMOSOME_II	13596883	13597965	+	WBGene00000804	csc-1	cds
C39E9.13	4	4.39292	4.95407	5.10651	4.99884	5.36991	5.40358	5.46977	5.39348	5.45719	5.59197	1.19905	CHROMOSOME_IV	13095736	13096977	+	WBGene00004339	rfc-3	cds
F59B2.6	4	2.46675	3.56681	3.82276	3.96961	4.8939	4.66862	4.83809	4.4966	4.60803	5.13463	2.66788	CHROMOSOME_III	9002712	9004760	+	WBGene00006977	zif-1	cds
F56C9.10	4	3.26207	4.0735	4.12131	4.01042	4.685	4.57627	4.60444	4.73263	4.86543	4.96546	1.70338	CHROMOSOME_III	7329656	7335064	-	WBGene00018953		cds
Y37A1B.2	4	3.02359	3.93165	4.07169	3.95436	5.04626	4.76183	4.65918	4.96165	4.93766	5.03622	2.02267	CHROMOSOME_IV	14060980	14069831	-	WBGene00003086	lst-4	cds
R10E4.4	4	3.79602	4.52852	4.33233	4.39012	5.04752	5.03838	5.01826	5.1364	5.18232	5.50428	1.70826	CHROMOSOME_III	4288233	4291256	-	WBGene00003157	mcm-5	cds
C03E10.4	4	3.7251	4.0735	4.23912	4.36293	4.63856	4.60113	4.68569	4.69707	4.78776	5.18287	1.45777	CHROMOSOME_V	11282552	11286024	+	WBGene00001645	gly-20	cds
F57B10.7	4	1.70362	1.9939	2.32318	2.82819	3.13582	3.29907	3.25845	3.26099	3.39738	4.06354	2.35991	CHROMOSOME_I	6554730	6558594	+	WBGene00006607	tre-1	cds
C36A4.4	4	5.01959	5.23568	5.41906	5.78242	6.2614	6.13389	5.837	6.59548	6.4998	6.85785	1.83826	CHROMOSOME_III	3841240	3843598	-	WBGene00007965		cds
K06B9.2	4	4.45505	4.8279	5.06511	5.56824	6.08985	5.97986	5.65832	6.38444	6.27876	6.67226	2.2172	CHROMOSOME_IV	4188999	4195887	+	WBGene00019439		cds
F21D5.1	4	3.96319	4.26535	4.67641	4.88868	5.70469	5.62909	5.01826	5.74293	5.96322	6.18713	2.22394	CHROMOSOME_IV	8725707	8728048	+	WBGene00009006		cds
T03D8.1	4	3.58255	3.93241	4.43769	4.58814	5.22454	5.08517	4.81409	5.28113	5.36051	5.80399	2.22144	CHROMOSOME_V	20829780	20837521	+	WBGene00003830	num-1	cds
Y49A3A.2	4	4.58946	4.81377	5.21725	5.5404	5.84292	5.91817	5.6982	5.97541	5.9547	6.40929	1.81983	CHROMOSOME_V	14351192	14354406	+	WBGene00013025	vha-13	cds
F33H1.2	4	4.02354	4.51861	5.04672	6.04028	6.70245	6.52966	5.93035	7.18062	7.03343	7.18621	3.16268	CHROMOSOME_II	10171211	10172437	+	WBGene00001686	gpd-4	cds
T09F3.3	4	3.96193	4.55228	5.04492	6.30527	7.02367	6.78871	6.63695	7.60121	7.32314	7.37755	3.63928	CHROMOSOME_II	10394054	10395288	+	WBGene00001683	gpd-1	cds
Y49E10.14	4	3.69966	4.33676	4.87745	5.38991	5.96417	5.69952	5.71162	6.23873	6.24292	6.29146	2.5918	CHROMOSOME_III	12426761	12429076	+	WBGene00004027	pie-1	cds
T05G5.6	4	2.52244	3.12248	3.27193	4.00259	4.04453	4.18165	3.97671	4.82998	4.45533	4.74955	2.30754	CHROMOSOME_III	9751355	9752837	-	WBGene00001155	ech-6	cds
C47E12.5	4	4.20307	4.39374	4.5878	4.77973	5.19978	5.06434	5.25234	5.51006	5.25806	5.68947	1.4864	CHROMOSOME_IV	9989649	9995013	-	WBGene00006699	uba-1	cds
T07E3.3	4	3.98317	4.04098	4.39653	4.41549	4.97255	4.90356	4.78985	5.24217	5.03674	5.43091	1.44774	CHROMOSOME_III	6903841	6905230	+	WBGene00020314		cds
ZK40.1	4	3.34453	3.33057	3.80811	3.95184	4.49963	4.12407	4.39165	4.55606	4.57549	4.7251	1.39453	CHROMOSOME_V	6453179	6454956	+	WBGene00022646	acl-9	cds
F54C8.2	4	3.17462	3.27512	4.06097	4.10265	4.65536	4.62777	4.48665	5.00687	4.69164	4.99262	1.83225	CHROMOSOME_III	9433990	9435016	+	WBGene00010036	cpar-1	cds
Y54G2A.2	4	3.48343	3.71741	4.26547	4.20259	4.63265	4.6119	4.45511	4.95364	4.66568	4.80084	1.47021	CHROMOSOME_IV	2788688	2796811	+	WBGene00021868		cds
T20B12.8	4	3.10108	3.34635	4.30151	4.16366	4.78015	4.99469	4.99695	5.45581	4.97945	5.40069	2.35473	CHROMOSOME_III	7379077	7381531	-	WBGene00001974	hmg-4	cds
C05C10.5	4	2.98199	3.19211	4.20777	4.87655	6.27468	6.43698	6.5883	6.40881	6.64165	6.48202	3.65966	CHROMOSOME_II	9939095	9940278	+	WBGene00007332		cds
F18A1.7	4	3.06168	3.6062	4.40752	4.93831	6.06338	6.40448	6.42931	6.73936	6.47198	6.55862	3.67768	CHROMOSOME_II	7662653	7663706	-	WBGene00017548		cds
F32D1.7	4	3.08151	3.36859	3.90148	4.55427	5.5706	5.54483	5.77567	6.09221	5.90844	6.03077	3.01069	CHROMOSOME_V	4374960	4376165	-	WBGene00017986		cds
C28D4.3	4	4.07391	4.45584	4.72499	5.84285	6.83055	7.11567	7.29109	7.32544	7.40232	7.55637	3.48246	CHROMOSOME_IV	9739183	9740882	-	WBGene00001607	gln-6	cds
C50B6.2	4	4.94767	4.86806	5.4488	6.17336	6.90563	7.09498	7.18217	7.22206	7.29235	7.4014	2.53333	CHROMOSOME_V	13310171	13312253	-	WBGene00008218	nasp-2	cds
F01F1.12	4	4.54813	4.37462	4.8161	6.11511	6.84555	7.09978	7.25555	7.58994	7.68728	7.50375	3.31266	CHROMOSOME_III	5874627	5876580	-	WBGene00017166	aldo-2	cds
T05G5.7	4	2.73478	2.75466	3.45127	5.6004	6.85884	7.15916	7.3177	7.6181	7.85929	7.9223	5.18753	CHROMOSOME_III	9758842	9760304	+	WBGene00011501	rmd-1	cds
F02E8.4	4	0	0	0.533026	1.66722	3.72137	4.05818	3.79244	3.76543	3.39596	4.205	4.205	CHROMOSOME_X	4454103	4457279	+	WBGene00017177		cds
M110.5	4	1.80254	1.934	2.4029	3.33204	5.27136	5.6637	5.33935	5.51145	5.70111	5.79064	3.9881	CHROMOSOME_II	8226082	8229100	+	WBGene00000894	dab-1	cds
ZC308.4	4	0	0.463942	0.996949	1.86973	4.09422	4.72614	4.32504	4.12426	4.5114	4.35953	4.72614	CHROMOSOME_I	6368273	6369600	+	WBGene00022586		cds
ZK858.3	4	2.09889	2.05281	2.99492	3.38144	5.04845	5.60744	5.48485	5.58979	5.98461	5.94024	3.9318	CHROMOSOME_I	9126130	9127065	-	WBGene00014117	clec-91	cds
T01G9.5	4	3.48168	4.0551	4.44042	4.54424	5.43614	5.57235	5.17867	5.62554	5.64698	5.61207	2.16531	CHROMOSOME_I	8294872	8296976	+	WBGene00003183	mei-1	cds
W06H8.1	4	2.05943	2.51644	3.25342	3.72286	4.9969	5.15279	4.71263	5.42134	5.54844	5.32457	3.48901	CHROMOSOME_V	6208823	6217624	+	WBGene00004373	rme-1	cds
Y87G2A.8	4	2.20693	2.47396	2.92705	3.32174	4.68943	4.31981	4.06183	4.50757	4.48599	4.7538	2.54687	CHROMOSOME_I	13576237	13581581	+	WBGene00013597	gpi-1	cds
T21H3.3	4	4.49823	4.37902	4.66754	4.86585	5.28905	5.45469	5.10063	5.40969	5.45617	5.43114	1.07715	CHROMOSOME_V	1156270	1157761	+	WBGene00000552	cmd-1	cds
ZK632.1	4	4.3859	4.26504	4.66616	4.84139	5.59662	5.59544	5.43871	5.69568	5.64668	5.683	1.43063	CHROMOSOME_III	9794281	9798558	+	WBGene00003158	mcm-6	cds
C27H6.4	4	2.60698	2.90911	2.9539	2.98471	4.74663	4.92409	4.78917	5.05446	5.10325	5.15923	2.55225	CHROMOSOME_V	9983895	9986253	-	WBGene00007786	rmd-2	cds
T21C9.13	4	1.48978	1.73777	1.92785	2.5297	4.53237	4.77358	4.71352	4.91698	5.07624	5.12196	3.63218	CHROMOSOME_V	10597294	10598643	+	WBGene00011898		cds
Y54F10AM.11	4	0	0.463942	0.217437	1.03987	3.13417	3.11718	3.32884	3.61612	3.40165	3.55834	3.61612	CHROMOSOME_III	2562973	2563980	-	WBGene00021853		cds
F59B8.2	4	4.51291	4.94392	4.75673	4.9424	5.72575	5.94057	5.87294	6.09495	6.07048	6.20904	1.69613	CHROMOSOME_IV	9439070	9440790	-	WBGene00010317	idh-1	cds
R11A5.4	4	0	0.463942	0.631163	1.03987	3.17972	3.97002	3.18343	4.4966	3.93646	4.58832	4.58832	CHROMOSOME_I	7866127	7872075	+	WBGene00011232		cds
Y46E12BL.3	4	0.748353	1.73777	1.40405	2.49341	4.24225	4.96503	4.48624	5.03941	4.60186	4.67529	4.29106	CHROMOSOME_II	15230286	15232726	+	WBGene00021596	spsb-2	cds
F40F9.6	4	3.08151	3.13938	3.42169	3.28004	3.9056	4.01235	3.8401	4.0473	4.14632	4.12704	1.0648	CHROMOSOME_V	9725947	9729485	-	WBGene00009583	aagr-3	cds
T05E11.5	4	4.10217	4.39346	4.66504	4.57775	5.35869	5.66796	5.37361	5.91373	5.74006	5.68928	1.81155	CHROMOSOME_IV	11116552	11118866	-	WBGene00011481	imp-2	cds
C15F1.3	4	2.40512	2.86596	2.94624	3.70089	4.32458	4.57169	4.48665	4.87945	4.49267	5.02647	2.62135	CHROMOSOME_II	6955364	6965645	-	WBGene00006605	tra-2	cds
Y110A7A.4	4	1.84957	2.40246	2.42472	3.29379	4.14974	4.6864	4.5752	4.72795	4.71485	5.08795	3.23838	CHROMOSOME_I	5138262	5139450	+	WBGene00022455		cds
F26H9.5	4	1.97712	2.64592	2.54008	3.02957	3.56908	4.01541	4.06239	4.1455	3.88833	4.71281	2.73569	CHROMOSOME_I	9312636	9314480	-	WBGene00009177		cds
F58H1.1	4	2.96072	2.83355	3.17448	3.6753	3.82035	4.13624	3.9773	4.39374	4.46352	4.32837	1.62997	CHROMOSOME_V	11927633	11933306	-	WBGene00010284	aman-2	cds
ZK1128.5	4	2.24261	2.32608	2.65178	3.15161	3.19742	3.56993	3.39461	3.66596	3.68963	3.6556	1.44702	CHROMOSOME_III	10120689	10122835	+	WBGene00044072		cds
C25A1.5	4	3.56857	4.20232	4.34835	4.5526	5.05976	5.16415	5.63025	5.50598	5.57594	5.30807	2.06168	CHROMOSOME_I	10177169	10178911	+	WBGene00007707		cds
W05F2.3	4	3.85347	5.11832	5.48333	6.4496	7.02939	7.3387	7.98937	8.24481	8.13256	7.53304	4.39135	CHROMOSOME_I	3367641	3368554	-	WBGene00021035		cds
C27D6.4	4	1.89511	2.65954	3.01297	3.02201	3.59483	4.09515	3.97879	4.03975	4.1048	3.81731	2.20969	CHROMOSOME_II	5179028	5187561	-	WBGene00016162	crh-2	cds
C32E8.8	4	2.89763	4.05955	4.33233	4.56777	5.50653	5.77482	5.76345	5.88455	6.11277	5.70798	3.21514	CHROMOSOME_I	3789309	3792800	-	WBGene00004217	ptr-2	cds
Y65B4BL.5	4	3.04157	4.18111	4.59499	5.00616	6.11786	6.40518	6.60927	6.52896	6.51409	6.33586	3.5677	CHROMOSOME_I	511051	516459	-	WBGene00022037	acs-13	cds
F57B10.12	4	3.08151	4.35914	4.55822	4.82196	5.55166	5.8638	5.98557	5.79989	5.92967	5.65954	2.90405	CHROMOSOME_I	6564747	6565869	-	WBGene00003184	mei-2	cds
F10C5.2	4	4.08262	4.52852	4.42682	4.62111	4.7789	5.09956	5.19786	5.06942	5.27533	5.11622	1.19271	CHROMOSOME_III	472300	475353	+	WBGene00017328		cds
C36A4.9	4	3.94165	4.56822	4.53438	4.65989	5.84645	5.67164	6.14905	6.66155	6.42215	6.46041	2.7199	CHROMOSOME_III	3864018	3867080	+	WBGene00007969	acs-19	cds
ZC518.3	4	4.01446	4.63628	4.52688	4.59266	5.48402	5.57579	5.81265	6.13537	5.74175	6.1204	2.12091	CHROMOSOME_IV	12361546	12371804	+	WBGene00000376	ccr-4	cds
F54E7.3	4	3.91978	4.18551	4.29393	4.45643	5.06978	5.21711	5.52965	5.67997	5.28894	5.65114	1.76019	CHROMOSOME_III	5664190	5676687	+	WBGene00003918	par-3	cds
K10B2.3	4	3.94165	4.4158	4.68564	5.20243	6.64457	6.78159	7.15341	7.47043	7.19233	7.41144	3.52878	CHROMOSOME_II	6365706	6366916	+	WBGene00019606	clec-88	cds
Y48G1A.2	4	2.68379	3.14776	3.25043	3.61862	4.34132	4.60295	4.71334	5.03941	4.48465	4.76118	2.35563	CHROMOSOME_I	347465	348361	+	WBGene00021658		cds
R31.2	4	3.55277	3.7295	4.00004	3.97353	4.8542	4.83763	5.19735	5.20047	4.92832	5.03288	1.6477	CHROMOSOME_V	11917545	11924634	+	WBGene00011270		cds
T19B10.6	4	3.6356	4.0599	4.35833	4.34186	5.38001	5.76958	6.0069	6.00285	5.68711	5.78244	2.3713	CHROMOSOME_V	11237420	11239305	-	WBGene00011834		cds
DY3.8	4	2.87508	3.64361	3.95902	3.81433	4.787	5.3421	5.67146	5.76027	5.51943	5.79038	2.9153	CHROMOSOME_I	8758145	8758992	-	WBGene00008440		cds
M02B1.3	4	3.24459	3.84784	3.96099	3.85759	4.50603	4.89213	4.7885	5.18855	4.83668	5.09074	1.94396	CHROMOSOME_IV	12836484	12840650	+	WBGene00010828		cds
ZC168.4	4	4.58865	5.2145	5.40883	5.48723	6.36975	6.57028	6.63714	6.71761	6.68543	6.73021	2.14157	CHROMOSOME_IV	10735304	10737161	+	WBGene00000865	cyb-1	cds
ZC404.8	4	4.15818	5.29859	5.288	5.64365	6.69955	6.99366	7.42548	7.42477	7.28929	7.45959	3.30141	CHROMOSOME_V	6783169	6784905	-	WBGene00004984	spn-4	cds
R12E2.1	4	1.84957	2.67121	2.78949	2.57356	3.32525	3.51868	3.68811	3.9338	3.9394	3.81766	2.08983	CHROMOSOME_I	4182221	4184994	+	WBGene00020030		cds
T09B4.1	4	3.15603	4.08765	4.52802	4.23591	5.33525	5.53123	5.7883	6.02882	6.08078	5.94905	2.92475	CHROMOSOME_I	6185462	6188152	+	WBGene00020375		cds
R09A1.1	4	4.69396	5.4983	5.40049	5.72497	6.28213	6.52991	6.6086	7.06127	6.80775	6.70866	2.36731	CHROMOSOME_V	1008802	1018359	+	WBGene00019971	ergo-1	cds
Y50E8A.4	4	3.99368	4.95903	4.72714	4.93967	5.50073	5.7778	5.73755	6.14419	5.81201	6.13883	2.15051	CHROMOSOME_V	14731080	14734222	-	WBGene00006795	unc-61	cds
F11A10.1	4	4.40083	4.60125	4.89819	5.08866	5.38805	5.56402	5.58889	5.98032	5.75467	5.66613	1.57949	CHROMOSOME_IV	12079449	12084338	+	WBGene00008682	lex-1	cds
F53G12.5	4	4.36985	4.86846	5.15021	5.75053	6.22681	6.64268	6.61623	7.27004	6.91952	6.68146	2.90019	CHROMOSOME_I	127297	134065	+	WBGene00003229	mex-3	cds
W08F4.3	4	4.49823	4.67048	5.18602	5.65723	6.63159	6.75363	6.99498	7.61368	7.42102	7.07349	3.11545	CHROMOSOME_II	580599	582014	+	WBGene00021093		cds
T07A9.6	4	4.52744	5.08445	5.58347	5.81824	6.68145	6.65145	7.02777	7.2785	7.14414	7.07832	2.75106	CHROMOSOME_IV	419987	425173	-	WBGene00000913	daf-18	cds
ZC513.6	4	4.7974	5.45984	5.77868	6.2086	7.09965	7.16891	7.33007	7.90065	7.79526	7.6377	3.10325	CHROMOSOME_V	8029418	8031194	+	WBGene00003865	oma-2	cds
ZK177.6	4	3.55444	3.68189	3.96844	3.98134	4.66833	4.57791	4.73906	5.07493	4.83563	4.82001	1.52049	CHROMOSOME_II	5501616	5503889	+	WBGene00001511	fzy-1	cds
T21B10.2	4	5.07883	5.48297	5.38656	6.10064	7.1602	7.36686	7.46439	8.40027	8.14229	7.8867	3.32144	CHROMOSOME_II	8930923	8933737	+	WBGene00011884	enol-1	cds
F32H2.3	4	3.77181	4.11522	4.34533	4.45541	5.09074	4.98455	4.86251	4.88787	4.9495	4.66256	1.31893	CHROMOSOME_I	8966968	8970121	-	WBGene00004953	spd-2	cds
K10G6.3	4	0	0.814436	0.825618	1.32515	3.13499	3.32837	2.64005	2.5226	2.75205	2.64158	3.32837	CHROMOSOME_II	3961692	3972141	+	WBGene00004751	sea-2	cds
R01H2.3	4	2.55117	3.25016	3.80184	4.01042	5.62145	5.80461	5.42206	5.20893	5.31001	5.26378	3.25344	CHROMOSOME_III	7058458	7060537	-	WBGene00019811	egg-2	cds
ZC155.4	4	2.43626	2.88848	3.22533	3.13293	4.41348	4.6864	4.45511	4.42598	4.39057	4.52355	2.25013	CHROMOSOME_III	5211957	5214966	-	WBGene00022532		cds
Y51F10.2	4	0.645513	2.43128	2.46261	3.66806	5.51154	5.68469	5.76336	5.1834	5.35062	5.22063	5.11785	CHROMOSOME_I	1978007	1983439	+	WBGene00021763		cds
F33E11.2	4	2.73478	3.32261	3.35145	3.29379	4.24445	4.36757	4.06127	4.2408	4.45875	4.06978	1.72397	CHROMOSOME_V	296599	300009	+	WBGene00018010		cds
C25H3.6	4	3.19297	3.04862	3.72181	3.75365	4.26536	4.14802	4.71316	4.72325	4.06474	4.55184	1.67463	CHROMOSOME_II	5661149	5665225	+	WBGene00016115	mdt-26	cds
F39B2.3	4	1.48978	1.39391	1.88098	2.02959	2.54759	2.4884	2.93839	2.67661	2.40669	2.51486	1.54449	CHROMOSOME_I	14788113	14789478	-	WBGene00009554		cds
F35G2.1	4	4.1664	4.1332	4.8883	4.63648	5.13328	5.29049	5.60249	5.58852	5.35795	5.58752	1.46929	CHROMOSOME_IV	12200956	12207908	+	WBGene00009435		cds
F27C8.6	4	3.34453	3.80932	4.1227	4.60684	5.63264	6.04734	6.25152	6.11032	5.93065	5.66152	2.90699	CHROMOSOME_IV	9587081	9588817	-	WBGene00009186	trcs-1	cds
F42H11.2	4	3.19082	3.18335	3.72198	3.59499	4.31513	4.69826	4.63254	4.81013	4.6314	4.53325	1.62678	CHROMOSOME_I	9578516	9581265	-	WBGene00002276	lem-3	cds
R08C7.10	4	4.20201	4.17293	4.6371	4.73214	5.11946	5.5002	5.46935	5.36204	5.34129	5.40598	1.32727	CHROMOSOME_IV	4442391	4445834	-	WBGene00019953	wapl-1	cds
F36H2.2	4	2.91983	3.2339	3.93614	4.16771	4.50674	5.15542	5.61663	5.80662	5.35649	4.99903	2.88678	CHROMOSOME_I	9246018	9249376	-	WBGene00009499		cds
T23B12.6	4	2.46675	2.8447	3.53464	3.56742	3.9807	4.41148	4.90826	4.52663	4.48733	4.3064	2.44151	CHROMOSOME_V	8457592	8460398	-	WBGene00020721		cds
T03F6.3	4	2.93915	2.57022	3.66536	3.74763	5.07732	5.16443	5.25344	5.33915	5.01728	4.7807	2.76893	CHROMOSOME_III	13389281	13390766	+	WBGene00011399		cds
ZK1058.2	4	2.78117	2.35757	3.18103	3.58384	3.9992	4.33637	4.42394	4.17685	4.21708	3.90603	2.06637	CHROMOSOME_III	3908895	3914118	-	WBGene00003930	pat-3	cds
C08B11.3	4	3.80797	4.40481	4.79634	4.91496	5.14992	5.33393	5.13978	5.90858	5.43749	5.32457	2.1006	CHROMOSOME_II	8022599	8027707	-	WBGene00007433	swsn-7	cds
Y47G6A.18	4	1.97712	2.76729	2.94253	3.13643	3.24105	3.2131	3.18498	3.94588	3.39738	3.39372	1.96877	CHROMOSOME_I	3508638	3512738	-	WBGene00021644		cds
F01G4.1	4	4.94767	5.82406	6.03004	6.23608	6.34536	6.35331	6.55892	7.04013	6.84144	6.52856	2.09246	CHROMOSOME_IV	11126003	11131143	+	WBGene00004204	swsn-4	cds
F53F10.4	4	3.81983	4.35638	4.63464	4.65746	5.038	4.80013	4.93122	5.42861	5.2394	5.10049	1.60878	CHROMOSOME_I	3824948	3826517	+	WBGene00006833	unc-108	cds
F53A2.7	4	2.89763	3.6752	4.16268	4.69053	4.70398	4.56688	4.78917	5.38306	5.25728	5.08781	2.48543	CHROMOSOME_III	13344816	13346765	+	WBGene00009952		cds
F26F4.4	4	3.66219	4.23206	4.52678	4.67047	4.69589	4.7368	4.76434	5.52639	5.21767	5.22981	1.8642	CHROMOSOME_III	4900037	4903143	+	WBGene00017826	tag-340	cds
R11H6.1	4	2.52244	3.14776	3.41348	3.8325	3.69178	3.8909	3.93341	4.7466	4.4567	4.12048	2.22416	CHROMOSOME_V	14595253	14597052	-	WBGene00003982	pes-9	cds
F41G3.6	4	2.6576	3.58639	4.52554	3.9847	4.60326	4.67657	4.65973	5.24217	4.76901	4.88348	2.58457	CHROMOSOME_II	6742872	6744225	+	WBGene00018302		cds
F59B2.2	4	2.43626	3.10335	4.15113	3.80776	4.48553	4.4466	4.51671	5.09697	4.65857	4.40654	2.66071	CHROMOSOME_III	8994601	8996709	-	WBGene00010307		cds
R07H5.1	4	3.00049	3.97217	4.66961	4.64075	4.86922	4.95518	4.93122	5.54113	5.4524	5.39526	2.54064	CHROMOSOME_IV	11183115	11184283	+	WBGene00004199	prx-14	cds
Y73E7A.6	4	3.27935	4.12374	4.59997	4.5974	4.97365	5.05857	4.86106	5.55182	5.27417	5.22396	2.27247	CHROMOSOME_I	1607681	1610136	-	WBGene00022273		cds
Y57G11C.13	4	3.64739	4.04617	4.92349	4.90781	5.19488	5.34395	5.27021	5.65178	5.67738	5.49691	2.02999	CHROMOSOME_IV	14798108	14799278	+	WBGene00000192	arl-8	cds
C13F10.4	4	2.96072	3.6752	4.41587	4.21664	4.38016	4.4423	4.86235	5.252	4.68873	4.89457	2.29127	CHROMOSOME_V	7205603	7214885	-	WBGene00015743		cds
C13F10.7	4	2.85217	3.43599	4.06817	4.34434	4.17796	4.28422	4.93137	5.16618	4.71084	4.71716	2.31401	CHROMOSOME_V	7222031	7223261	-	WBGene00015746		cds
F26H11.1	4	3.22689	3.48568	3.94571	3.93493	3.89904	4.07416	4.32527	4.38782	4.25632	4.11417	1.16093	CHROMOSOME_II	14389159	14390002	-	WBGene00009179	kbp-3	cds
Y56A3A.21	4	4.8548	5.53589	6.26012	6.17115	6.23038	6.42973	6.824	7.3067	7.2177	6.83225	2.4519	CHROMOSOME_III	11920616	11921518	+	WBGene00013238	trap-4	cds
C24A11.9	4	0.748353	1.20409	1.61994	2.0547	1.86848	2.32523	2.52728	2.99038	2.40385	2.4769	2.24203	CHROMOSOME_I	5412845	5415632	-	WBGene00000761	coq-1	cds
C53A5.3	4	4.6497	5.05886	5.38792	5.57112	5.79197	5.80647	6.03825	6.54373	5.9437	6.09549	1.89402	CHROMOSOME_V	14525372	14527398	+	WBGene00001834	hda-1	cds
C28D4.2	4	3.91978	4.37077	4.3866	4.55046	4.77074	4.41587	5.03926	5.16271	5.06	5.01959	1.24293	CHROMOSOME_IV	9731718	9737602	-	WBGene00000509	cka-1	cds
C39D10.7	4	1.16618	3.001	3.11826	4.80124	4.75706	4.75838	6.71147	7.00031	6.9483	7.09699	5.93081	CHROMOSOME_X	7907907	7914076	-	WBGene00016534		cds
F49E12.1	4	1.23863	3.78762	3.88954	4.80985	5.23502	5.82612	7.44156	7.64509	7.56667	7.3179	6.40646	CHROMOSOME_II	8399792	8404799	-	WBGene00009897		cds
Y92H12A.1	4	3.26207	3.9068	3.6769	4.055	4.20093	4.28649	4.71298	4.91083	4.60741	4.75344	1.64876	CHROMOSOME_I	1566933	1580198	+	WBGene00005077	src-1	cds
F49D11.9	4	2.78117	4.092	4.09229	4.31879	4.39859	4.32228	5.2707	5.06382	4.81909	5.03637	2.48953	CHROMOSOME_I	10933810	10935705	-	WBGene00018632	tag-296	cds
Y63D3A.8	4	2.82889	3.89114	4.00551	4.30684	4.43561	4.43751	5.14071	4.97163	4.95338	4.91237	2.31182	CHROMOSOME_I	14114180	14118642	+	WBGene00013407		cds
C50B6.3	4	3.39296	3.9627	3.9477	4.29378	4.46605	4.51027	4.78883	4.74896	4.578	4.93745	1.5445	CHROMOSOME_V	13313585	13315801	+	WBGene00008219		cds
C56C10.13	4	2.80523	3.36915	3.55978	4.12988	4.1028	4.0409	4.51732	4.64831	4.49	4.99606	2.19083	CHROMOSOME_II	6594344	6598038	-	WBGene00001026	dnj-8	cds
Y41E3.11	4	2.6607	3.3614	3.55736	3.89452	4.03383	3.6533	4.14247	4.12426	4.1842	4.6239	1.96319	CHROMOSOME_IV	15040043	15049251	+	WBGene00012769		cds
Y77E11A.11	4	2.37329	3.14841	3.18731	3.4452	3.65165	3.40645	3.88751	3.7882	3.7492	3.99772	1.62442	CHROMOSOME_IV	1435466	1446026	-	WBGene00000547	clp-7	cds
K07G5.1	4	2.78402	3.32203	3.6206	3.73991	4.1222	3.96119	4.45553	4.54273	4.48733	4.7969	2.01288	CHROMOSOME_I	7152458	7156784	-	WBGene00010641	crml-1	cds
Y47G6A.8	4	3.55444	3.99738	4.25621	4.166	4.46252	4.36277	4.88541	4.91083	4.86697	5.18916	1.63471	CHROMOSOME_I	3481989	3484502	+	WBGene00000794	crn-1	cds
F10D11.2	4	2.82889	3.44281	3.56461	3.91618	4.17907	3.81313	4.18026	4.4966	4.51206	4.60131	1.77242	CHROMOSOME_I	8435956	8438632	-	WBGene00008648		cds
F25H5.3	4	4.89392	5.24413	5.42953	6.06266	6.20904	6.15502	6.32224	6.77843	6.7248	6.76854	1.88451	CHROMOSOME_I	9168417	9177490	+	WBGene00009126	pyk-1	cds
ZK863.4	4	4.36177	4.62085	4.91574	5.24079	5.3675	5.27163	5.52955	5.67268	5.7868	5.73273	1.42503	CHROMOSOME_V	12181479	12184177	-	WBGene00014124		cds
W07G4.4	4	5.48052	5.85177	6.0838	6.28498	6.43126	6.40137	6.60219	6.97235	6.86757	6.8237	1.49183	CHROMOSOME_V	13043695	13046369	+	WBGene00002250	lap-2	cds
F55A11.3	4	3.59478	4.14613	4.4524	4.60604	4.69077	4.63039	4.95367	5.00497	5.35869	5.33793	1.7639	CHROMOSOME_V	11767308	11769883	+	WBGene00004768	sel-11	cds
C34E10.8	4	2.80523	3.28334	3.28392	3.85817	3.85372	3.5311	3.88751	4.01689	3.93057	4.08922	1.28399	CHROMOSOME_III	5249036	5254152	-	WBGene00016409		cds
R08D7.6	4	3.06168	4.11094	4.05925	4.84713	4.92738	4.66708	4.95336	5.21058	4.88755	4.94782	2.1489	CHROMOSOME_III	8974988	8981820	-	WBGene00011146	pde-2	cds
K02B2.3	4	3.64739	4.24413	4.04485	4.7932	4.63579	4.6864	5.12074	5.00299	5.06045	4.93388	1.47335	CHROMOSOME_IV	5937433	5939220	-	WBGene00019296	mcu-1	cds
Y39H10A.3	4	2.63093	3.43545	3.25043	4.07239	3.98208	3.88088	4.54655	4.40553	4.18255	4.29019	1.91562	CHROMOSOME_V	3743563	3749420	+	WBGene00003479	mtm-9	cds
Y69A2AR.6	4	1.48978	1.95475	2.20733	3.27052	3.19207	3.31901	3.79244	3.58008	3.45912	3.34064	2.30265	CHROMOSOME_IV	2608047	2610210	+	WBGene00022077		cds
C01C7.1	4	1.80254	2.5014	3.12506	3.34228	3.66329	4.00654	4.575	4.03975	4.54862	3.60289	2.77246	CHROMOSOME_IV	12622061	12630999	-	WBGene00000186	ark-1	cds
F11A10.3	4	3.09879	3.43545	4.01829	3.9603	4.26025	4.52412	4.76416	4.35471	4.73937	4.41683	1.66537	CHROMOSOME_IV	12089225	12092191	-	WBGene00008684	mig-32	cds
C17E4.10	4	3.79602	4.32855	4.76538	4.86221	5.08209	4.90174	5.68539	5.39793	5.54427	5.08444	1.88938	CHROMOSOME_I	9435370	9441022	+	WBGene00007647		cds
K04C2.3	4	4.56853	5.03524	5.68608	5.8084	5.84076	5.82933	6.33119	6.04774	6.40213	5.94866	1.8336	CHROMOSOME_III	6872994	6873653	+	WBGene00019381		cds
C30H7.2	4	3.67376	3.98771	4.17742	4.31149	4.37545	4.29658	4.54555	4.53739	4.76184	4.46612	1.08807	CHROMOSOME_I	5416652	5420734	-	WBGene00016278		cds
F29G9.5	4	4.20307	4.59183	5.02162	5.15316	5.41248	5.12102	5.35641	5.59237	5.7037	5.36186	1.50063	CHROMOSOME_V	6016032	6017654	-	WBGene00004502	rpt-2	cds
C16C10.5	4	3.40874	3.64952	3.97612	4.29164	4.72375	4.3211	4.83875	4.48554	5.0609	4.71698	1.65216	CHROMOSOME_III	4168771	4171135	-	WBGene00007626	rnf-121	cds
C41C4.8	4	4.88266	5.02582	5.23977	5.36231	5.84998	5.57224	5.99657	5.55712	5.88411	5.76889	1.11391	CHROMOSOME_II	8137828	8141224	+	WBGene00008053		cds
F46F3.4	4	3.49826	3.47802	3.94585	4.39318	4.66776	4.57562	5.25308	4.6729	4.99708	4.95474	1.77506	CHROMOSOME_V	11675924	11685259	+	WBGene00000146	ape-1	cds
F56C11.5	4	2.05943	2.2126	2.83138	3.09745	3.45099	3.38819	4.06127	3.76543	4.02447	3.84043	2.00184	CHROMOSOME_I	178538	182159	+	WBGene00018957		cds
F53E4.1	4	2.1373	2.08942	3.06317	3.11045	3.38219	3.48192	3.39505	3.14614	4.018	3.53962	1.92857	CHROMOSOME_V	15652419	15659048	-	WBGene00009978		cds
ZK643.5	4	2.27742	2.19527	2.82736	3.29379	3.45744	3.79545	3.52024	3.26099	3.98208	3.54859	1.78681	CHROMOSOME_III	8952807	8956119	-	WBGene00014036		cds
Y76A2B.1	4	2.01886	1.95475	3.08737	2.69293	3.44201	3.25209	3.45879	3.07413	3.74697	3.29773	1.79222	CHROMOSOME_III	13514849	13523992	-	WBGene00004075	pod-1	cds
ZK550.4	4	2.43626	2.47501	3.18754	3.23711	3.75387	3.58322	3.74139	3.65613	3.98208	3.58515	1.54582	CHROMOSOME_IV	17255224	17257520	+	WBGene00013998		cds
B0334.11	4	3.52578	4.31687	4.27604	4.62361	4.90496	4.82043	4.51691	5.02038	5.01728	4.7328	1.4946	CHROMOSOME_II	11493167	11495250	-	WBGene00003868	ooc-3	cds
Y59A8A.3	4	2.80523	4.32116	4.41165	4.78339	5.2643	5.30779	4.99681	5.59625	5.55069	5.03941	2.79102	CHROMOSOME_V	17845718	17855965	-	WBGene00013340		cds
Y105E8A.9	4	3.00294	3.84824	3.82693	4.05197	4.27878	4.41404	3.97819	4.41436	4.48866	4.3444	1.48573	CHROMOSOME_I	14406016	14417916	+	WBGene00000158	apg-1	cds
C01F6.1	4	2.01886	2.98954	3.07363	3.34035	3.96511	3.79938	3.57761	3.84122	4.10393	3.41304	2.08507	CHROMOSOME_IV	9096825	9099472	+	WBGene00007221	cpna-3	cds
DY3.7	4	2.91724	3.93763	4.46843	4.37538	5.15681	5.31538	4.83875	5.35294	5.34314	5.02923	2.4357	CHROMOSOME_I	8792959	8797287	+	WBGene00006324	sup-17	cds
R12E2.2	4	2.68379	3.42062	3.68119	3.87732	4.43301	4.49721	4.21809	4.8387	4.95193	4.44638	2.26814	CHROMOSOME_I	4178812	4182160	+	WBGene00020031		cds
T13C2.6	4	0	1.61473	1.62919	1.86129	2.99436	2.94287	2.64005	3.44375	3.52747	2.93779	3.52747	CHROMOSOME_II	6783382	6788416	+	WBGene00020481		cds
C50D2.7	4	0.748353	1.53633	1.67593	2.51363	2.8268	3.14654	3.02459	3.02135	3.57898	2.51486	2.83062	CHROMOSOME_II	92181	95280	-	WBGene00016810		cds
T01G9.2	4	1.0899	2.03344	1.98825	2.86127	2.85515	2.969	3.10592	3.37936	3.52095	2.92342	2.43105	CHROMOSOME_I	8275436	8288119	-	WBGene00011344		cds
T12E12.4	4	3.12038	3.71089	3.61828	4.25916	4.21419	4.37498	4.32433	4.4966	4.57423	4.06978	1.45385	CHROMOSOME_IV	5538481	5541356	+	WBGene00001093	drp-1	cds
F25B3.1	4	3.73619	4.19426	4.32654	4.48055	5.00652	4.61127	4.76468	4.7138	4.93079	4.476	1.27034	CHROMOSOME_V	9550620	9556005	+	WBGene00009098	ehbp-1	cds
ZK524.4	4	1.84957	2.58263	2.85612	3.29379	3.76578	3.15153	3.32837	3.59044	3.84482	3.28655	1.99526	CHROMOSOME_I	7460850	7466420	-	WBGene00013994		cds
C07D10.2	4	3.26207	3.80403	3.88554	3.99823	4.32322	4.42534	4.06211	4.27016	4.68465	4.59287	1.42257	CHROMOSOME_II	7394722	7397308	+	WBGene00015567	bath-44	cds
D1022.7	4	4.36177	4.7913	4.66504	4.86749	5.18674	5.10917	4.99783	5.25851	5.47292	5.4286	1.11115	CHROMOSOME_II	7472685	7478914	-	WBGene00000101	aka-1	cds
F01G10.1	4	4.52574	5.22962	5.10835	5.71414	6.15519	5.89214	5.83684	6.14243	6.30953	6.50023	1.97449	CHROMOSOME_IV	10243569	10245730	+	WBGene00008506	tkt-1	cds
F14E5.2	4	2.05943	3.14841	2.65665	3.54029	3.57852	3.62429	3.32744	3.83252	4.26102	3.63811	2.20159	CHROMOSOME_II	8423900	8429012	-	WBGene00008800		cds
T12B3.4	4	2.34461	3.02919	2.60928	3.41353	3.41471	3.64147	3.39505	3.47764	3.88934	3.59425	1.54473	CHROMOSOME_IV	7384701	7388927	-	WBGene00020447		cds
Y106G6H.14	4	2.34075	2.95981	2.71126	3.43282	3.51188	3.79901	3.25845	3.96599	4.14292	3.90669	1.80218	CHROMOSOME_I	10472187	10473380	-	WBGene00013724		cds
C16C2.4	4	3.02359	3.62432	4.04843	3.93968	4.08965	4.10092	4.39187	4.30832	4.14462	4.60602	1.58243	CHROMOSOME_I	9712814	9715223	-	WBGene00007621		cds
F43G6.9	4	4.35459	5.22931	5.51327	5.51995	5.82386	5.75574	6.05959	5.99603	6.21554	6.36925	2.01465	CHROMOSOME_II	11774601	11777882	-	WBGene00009661	patr-1	cds
F58B3.6	4	3.59478	4.09769	4.44173	4.32954	4.56292	4.55077	4.97562	4.81897	4.81483	5.0685	1.47371	CHROMOSOME_IV	11636623	11638186	+	WBGene00010232		cds
F43E2.4	4	2.31141	3.63125	3.75484	3.58989	3.97183	4.22066	4.6316	4.33636	4.2571	4.98288	2.67148	CHROMOSOME_II	7353535	7356383	-	WBGene00001812	haf-2	cds
K03B4.2	4	4.27273	5.0328	5.10753	4.90024	5.22215	5.16248	5.37418	5.36204	5.51975	5.75088	1.47815	CHROMOSOME_V	4687978	4689221	+	WBGene00019354		cds
Y47D7A.14	4	1.16618	2.76644	3.06317	2.72922	3.50327	3.20776	3.79075	4.03975	4.32799	4.49069	3.32451	CHROMOSOME_V	4443059	4450541	-	WBGene00021626		cds
T24D1.2	4	3.98317	4.68252	4.57184	4.67332	4.89177	4.81988	4.90873	4.90042	5.03948	5.3	1.31683	CHROMOSOME_I	9953397	9955865	-	WBGene00011985		cds
Y49E10.3	4	3.42253	4.14613	4.32665	4.1933	4.77869	4.62134	4.63216	4.69951	5.0627	5.35397	1.93144	CHROMOSOME_III	12374137	12377149	-	WBGene00004086		cds
F52C9.8	4	3.48168	3.88033	4.3192	3.99805	4.44239	4.20679	4.83842	4.36078	4.57737	4.87637	1.39469	CHROMOSOME_III	5311206	5321693	+	WBGene00004095	pqe-1	cds
K02A11.1	4	2.17036	3.49884	3.53217	3.04962	4.01016	3.76594	4.54675	4.0473	4.21789	4.49091	2.37639	CHROMOSOME_I	9737807	9744113	+	WBGene00001582	gfi-2	cds
F25H2.8	4	3.42253	4.07892	4.27468	4.13706	4.42847	4.84696	5.08078	4.64578	4.97516	5.16826	1.74573	CHROMOSOME_I	10562957	10564903	+	WBGene00006720	ubc-25	cds
F58A4.10	4	4.35459	4.88766	5.07041	4.98654	5.36671	5.52079	5.64515	5.36204	5.72757	5.73273	1.37814	CHROMOSOME_III	9630001	9631085	-	WBGene00006704	ubc-7	cds
W02D3.9	4	2.75961	3.58591	3.9477	3.8187	4.0781	4.45183	4.45575	4.28299	4.63382	4.84656	2.08695	CHROMOSOME_I	6742294	6745342	-	WBGene00006773	unc-37	cds
F26B1.3	4	5.18537	5.48653	5.77712	5.61559	5.99718	6.22004	6.33956	6.01248	6.38955	6.67859	1.49322	CHROMOSOME_I	6315233	6317269	+	WBGene00002073	ima-2	cds
T04A8.8	4	4.52744	4.9841	5.05552	5.02294	5.22966	5.34646	5.46988	5.19196	5.46445	5.74671	1.21927	CHROMOSOME_III	4693960	4695234	+	WBGene00011410		cds
K08F4.3	4	3.63402	3.89651	4.17561	4.04758	4.50819	4.67657	4.88461	4.59775	4.88602	4.85777	1.252	CHROMOSOME_IV	10129253	10130225	+	WBGene00010678		cds
T26A5.7	4	2.87508	3.61878	3.90133	3.59499	3.63772	4.46508	4.63198	3.90496	4.54219	4.70443	1.82935	CHROMOSOME_III	6450755	6452322	-	WBGene00004781	set-1	cds
C01G6.5	4	2.57934	3.6752	3.98349	3.56223	4.06688	4.38807	4.35884	4.53202	4.25632	4.58852	2.00918	CHROMOSOME_II	9274994	9280038	-	WBGene00007227		cds
T21B10.5	4	2.98199	3.73507	4.05754	3.78624	4.08975	4.1181	4.18052	4.2604	4.24844	4.38048	1.3985	CHROMOSOME_II	8938995	8940426	-	WBGene00011887	set-17	cds
T23G5.2	4	2.85217	3.54745	4.00551	3.37741	4.27766	4.34318	4.42373	4.40553	4.32125	4.4016	1.57156	CHROMOSOME_III	9231314	9236244	-	WBGene00011962		cds
C54G10.3	4	1.16618	2.98018	3.39671	2.76462	3.38949	3.53155	3.88846	3.70948	3.79348	3.52108	2.72228	CHROMOSOME_V	14646738	14653452	+	WBGene00004060	pmp-3	cds
K02C4.3	4	1.97712	3.39863	3.57715	3.12237	3.7424	3.71676	4.18	4.25389	3.79456	3.77064	2.27678	CHROMOSOME_II	8080737	8086797	-	WBGene00010502		cds
C17E4.3	4	1.97712	2.98954	3.14825	3.03469	3.90608	3.5574	4.51691	4.40553	4.2571	3.68068	2.53979	CHROMOSOME_I	9416696	9418869	-	WBGene00007643		cds
F07A5.1	4	2.70951	3.85337	3.87959	3.79513	4.55516	4.63396	4.88572	4.98347	4.76736	4.52851	2.27396	CHROMOSOME_I	7349974	7352195	-	WBGene00002136	inx-14	cds
K10D2.6	4	3.54187	4.55883	4.63357	4.49165	5.08226	5.30595	5.50049	5.74411	5.58128	5.13775	2.20225	CHROMOSOME_III	5196639	5199649	-	WBGene00001262	emb-8	cds
F31C3.4	4	4.54099	5.35302	5.62694	5.59527	5.79315	5.98918	6.27893	6.228	6.1267	5.87886	1.73794	CHROMOSOME_I	15050786	15052409	-	WBGene00009286		cds
K04F10.7	4	1.75393	2.37194	2.86005	2.70113	3.04115	3.24004	3.3955	3.36736	3.45639	3.1224	1.70246	CHROMOSOME_I	6366363	6368081	+	WBGene00019399		cds
D2023.2	4	3.54018	4.32145	4.61919	4.42124	4.7306	5.11503	5.34073	5.62174	5.23821	5.08149	2.08156	CHROMOSOME_V	11817764	11822510	-	WBGene00004258	pyc-1	cds
T01H3.1	4	3.06168	3.77559	4.35405	3.9132	4.3513	4.74477	4.97532	5.08049	4.69105	4.6879	2.01881	CHROMOSOME_II	7878031	7879284	-	WBGene00006913	vha-4	cds
H05C05.2	4	2.73478	3.63767	3.86972	3.66167	4.16741	4.85534	5.0812	5.252	4.68582	4.99621	2.51722	CHROMOSOME_III	2962162	2965628	-	WBGene00019158		cds
Y57G11C.15	4	5.55167	6.0043	6.44145	5.90337	6.23101	6.74162	6.8431	6.90588	6.68159	6.62016	1.35421	CHROMOSOME_IV	14822500	14825146	-	WBGene00013311		cds
F58E10.1	4	2.68379	3.77559	3.72861	3.64768	4.24407	4.18165	4.51753	4.82998	4.10915	4.48113	2.14619	CHROMOSOME_V	13987156	14006064	-	WBGene00010259		cds
Y51H1A.4	4	2.43626	3.79172	4.01802	3.64858	4.3622	4.20918	4.45681	4.78328	3.93352	4.73317	2.34701	CHROMOSOME_II	13875962	13882515	+	WBGene00013095	ing-3	cds
T06E4.1	4	2.34075	3.38396	3.40791	3.45924	3.99089	3.80609	3.84076	4.14907	3.39881	3.92843	1.80833	CHROMOSOME_V	9645816	9650285	+	WBGene00001830	hcp-2	cds
Y47G6A.6	4	0.645513	1.3632	1.52101	1.27521	1.89895	2.05938	2.4014	2.24914	1.53869	2.33408	1.75589	CHROMOSOME_I	3516481	3523390	+	WBGene00021636	pcaf-1	cds
F22D3.1	4	3.54018	4.34379	4.30151	4.16194	4.66447	4.94593	4.90826	5.66779	5.12332	5.46084	2.12761	CHROMOSOME_II	6951598	6955366	+	WBGene00000459	ceh-38	cds
W02D3.4	4	3.91978	4.88727	4.56935	4.72561	5.01345	5.34773	5.23499	5.79766	5.54555	5.69122	1.87788	CHROMOSOME_I	6719369	6723062	-	WBGene00020933		cds
F41C3.5	4	1.23863	3.17518	2.99466	2.77486	3.52407	4.58084	5.50007	5.86435	5.25689	6.20674	4.96811	CHROMOSOME_II	4737613	4739902	+	WBGene00018271		cds
ZK792.2	4	0.748353	3.03965	2.31131	2.35547	2.94787	4.37548	5.23412	6.40953	5.86632	6.36273	5.66117	CHROMOSOME_IV	11673793	11675615	+	WBGene00002130	inx-8	cds
F22F7.1	4	3.27935	4.20634	4.17233	3.94314	4.51867	4.81092	4.97503	5.48528	5.56416	5.17116	2.28481	CHROMOSOME_V	2127532	2130063	+	WBGene00017719		cds
W06A7.3	4	4.49823	5.28811	5.21855	5.10223	5.66792	5.68297	6.10948	6.3467	6.21123	6.05839	1.84848	CHROMOSOME_V	14829162	14847297	-	WBGene00004336	ret-1	cds
F46F11.5	4	3.10108	3.58639	3.42985	3.55011	3.88536	3.99632	4.60406	5.34378	4.25553	4.7969	2.2427	CHROMOSOME_I	5609313	5610279	-	WBGene00006919	vha-10	cds
ZK593.4	4	3.77324	4.31344	4.10076	4.01372	4.6475	4.74845	5.10104	5.46146	4.95532	5.15616	1.68822	CHROMOSOME_IV	10920086	10926776	+	WBGene00004319	rbr-2	cds
K02B2.1	4	2.6576	3.32319	3.49375	3.29065	3.53866	3.46813	3.93341	4.54001	3.97447	4.29553	1.88241	CHROMOSOME_IV	5941914	5943989	+	WBGene00019295		cds
M01A10.3	4	3.81844	4.6854	4.85314	4.41837	5.05087	5.12087	5.35629	5.78644	5.37841	5.50648	1.968	CHROMOSOME_I	5549140	5550508	-	WBGene00019693	ostd-1	cds
T05H4.11	4	3.84189	4.45246	4.9627	4.45554	5.00064	4.8747	5.21591	5.53178	5.33869	5.48239	1.68989	CHROMOSOME_V	6424233	6425937	-	WBGene00020274		cds
Y38C9A.2	4	3.89757	4.61132	5.01979	4.60604	5.07915	4.88044	5.25295	5.66655	5.34424	5.23867	1.76897	CHROMOSOME_V	118043	122966	-	WBGene00000480	cgp-1	cds
K08D9.3	4	3.00294	3.64998	3.86552	3.55178	3.55665	3.82088	4.10312	4.43175	4.29222	4.1202	1.42881	CHROMOSOME_V	3210189	3223128	+	WBGene00000168	apx-1	cds
K11D9.2	4	3.74864	4.33676	4.39653	4.31262	4.28456	4.78927	4.73836	5.29226	5.12762	4.94814	1.54361	CHROMOSOME_III	10811807	10816746	-	WBGene00004736	sca-1	cds
B0513.4	4	1.89511	2.34191	3.03829	4.00955	4.0751	4.70685	6.28773	6.41756	5.76389	6.57416	4.67905	CHROMOSOME_IV	13880113	13881521	+	WBGene00007196		cds
C44B12.1	4	2.46675	3.54794	4.52431	5.95601	5.74326	6.45676	8.29531	8.62219	8.07577	8.66317	6.19643	CHROMOSOME_IV	1126791	1128848	+	WBGene00016636	perm-2	cds
C44B12.5	4	3.761	4.28186	4.98233	6.65797	6.42316	7.4151	9.12648	9.57234	8.95939	9.19949	5.81134	CHROMOSOME_IV	1121457	1125283	-	WBGene00016638	perm-4	cds
Y50E8A.3	4	0	0	0.217437	0.645124	0.68006	0.937693	1.27832	1.40028	1.27105	1.40414	1.40414	CHROMOSOME_V	14729642	14731063	+	WBGene00003861	oig-3	cds
F35C8.6	4	0	0	0.406354	1.68037	1.8838	2.5514	3.32837	4.0473	3.10789	3.93529	4.0473	CHROMOSOME_X	5353022	5354112	-	WBGene00003990	pfn-2	cds
C28C12.7	4	0.748353	1.42397	1.37051	2.94496	2.90274	3.7783	5.1788	5.6103	5.27106	5.11335	4.86195	CHROMOSOME_IV	8477167	8480626	+	WBGene00004995	spp-10	cds
F20H11.5	4	0.748353	1.64056	1.86482	3.37148	3.43363	4.12213	5.81332	6.13006	5.87178	5.24984	5.3817	CHROMOSOME_III	6587811	6589345	+	WBGene00017648	ddo-3	cds
T14F9.3	4	1.0899	0.902484	0.874292	2.15289	2.13899	2.22201	3.39416	3.64623	3.33139	4.02459	3.1503	CHROMOSOME_X	2223468	2226612	+	WBGene00020509	hex-1	cds
C15H9.9	4	2.13283	2.03344	2.48903	3.86451	3.25441	4.19846	5.46967	6.13977	6.40102	5.93715	4.36758	CHROMOSOME_X	6127419	6128291	-	WBGene00015803		cds
H13N06.6	4	1.54797	1.39391	2.10858	3.72751	3.53271	4.21829	5.53026	6.09588	6.44814	6.53603	5.14213	CHROMOSOME_X	15500188	15504827	-	WBGene00006541	tbh-1	cds
F02A9.2	4	2.20693	1.76151	2.06048	3.43074	3.5168	4.2362	5.17841	5.87922	5.94541	5.39301	4.1839	CHROMOSOME_III	9080290	9081108	-	WBGene00001385	far-1	cds
Y59H11AR.2	4	0	0	0.406354	1.13204	1.48883	1.26857	2.74743	3.46643	3.9345	3.53102	3.9345	CHROMOSOME_IV	8585529	8594603	+	WBGene00022010	catp-7	cds
F46E10.1	4	0	0.72418	0.406354	1.53167	1.18734	1.50127	2.4014	2.715	3.02498	2.86582	3.02498	CHROMOSOME_V	6524972	6532074	+	WBGene00018488	acs-1	cds
R07H5.4	4	0	0.52069	1.02631	2.54366	1.88575	2.23146	4.02018	4.10271	4.19079	4.55713	4.55713	CHROMOSOME_IV	11186991	11188248	+	WBGene00011124	sdz-27	cds
T10B10.4	4	0	0.72418	1.10999	1.88117	1.74241	1.60576	2.84672	3.40905	3.69196	3.17186	3.69196	CHROMOSOME_X	15190053	15192997	+	WBGene00011681		cds
C17G1.2	4	0	0.52069	1.74757	1.75846	1.14039	1.6219	3.63543	4.12426	3.84064	3.9209	4.12426	CHROMOSOME_X	9921497	9922785	+	WBGene00007649		cds
Y32F6A.5	4	0	0.463942	1.15008	1.68037	1.5784	1.82266	4.02105	4.4375	4.2195	4.47151	4.47151	CHROMOSOME_V	10446511	10453949	-	WBGene00012530		cds
Y73E7A.3	4	0	0	0.406354	0.5356	0.146475	0.472435	1.53804	1.97608	1.76436	1.88596	1.97608	CHROMOSOME_I	1584331	1593670	+	WBGene00022270		cds
K11C4.4	4	0	0	0	0.556656	0.357971	0.507611	1.9477	1.97608	1.53351	1.7956	1.97608	CHROMOSOME_V	6898523	6900205	-	WBGene00003844	odc-1	cds
F32H2.5	4	1.54797	0.814436	1.85696	3.102	2.53324	3.00894	4.97592	5.16618	5.51385	4.60212	4.69942	CHROMOSOME_I	8975377	8986515	-	WBGene00009342	fasn-1	cds
JC8.8	4	0.748353	0.52069	1.49011	1.89475	1.96502	1.86397	3.84174	4.13846	3.69312	3.55834	3.61777	CHROMOSOME_IV	13250629	13252289	-	WBGene00010440	ttr-51	cds
F41D9.3	4	0	0	0.217437	1.49941	1.04516	1.60406	3.52065	4.49379	4.0115	2.78937	4.49379	CHROMOSOME_X	8387414	8392529	-	WBGene00006942	wrk-1	cds
C05G5.2	4	0	0	0	0.210329	0.989631	0.937693	1.53642	1.75407	1.28344	0.924125	1.75407	CHROMOSOME_X	14747251	14750321	+	WBGene00007348		cds
C37H5.14	4	0	0.283709	0	0.370268	0.644543	1.01563	1.53804	2.06793	1.28344	1.13609	2.06793	CHROMOSOME_V	4832001	4834566	-	WBGene00045308		cds
C41H7.4	4	0	0	0	0	1.15921	1.4278	2.64005	2.67661	2.64985	1.7637	2.67661	CHROMOSOME_II	3003985	3005600	+	WBGene00016574		cds
ZK377.2	4	0	0.463942	0	0	1.33341	2.49718	3.18549	3.56964	3.52095	2.437	3.56964	CHROMOSOME_X	3451920	3465912	-	WBGene00004729	sax-3	cds
R09A8.1	4	0	0	0	0	0.964751	1.63787	2.26543	2.47865	2.27245	1.08537	2.47865	CHROMOSOME_X	12612659	12618253	+	WBGene00011152		cds
C45G9.7	4	0	0.283709	0	0.492542	0.68006	1.46407	2.11422	1.97608	2.12098	1.27633	2.12098	CHROMOSOME_III	5046133	5047106	-	WBGene00016678		cds
F55C12.1	4	0	0.283709	0	0.183506	0.357971	1.24574	1.53804	1.75407	1.53351	0.924125	1.75407	CHROMOSOME_II	5884527	5892652	+	WBGene00018869		cds
C07A12.4	4	0.748353	1.50854	2.18194	2.8454	3.49139	5.61345	6.38886	6.32122	6.29133	5.76074	5.64051	CHROMOSOME_X	4524159	4526508	+	WBGene00003963	pdi-2	cds
C26E6.2	4	0	1.02238	1.06876	1.26245	2.02286	3.92451	4.51732	4.3578	3.93548	3.97638	4.51732	CHROMOSOME_III	4952086	4955085	+	WBGene00016138	flh-2	cds
F49E11.1	4	3.89889	4.10631	4.36132	4.52373	5.25697	5.66816	6.17775	6.17297	6.16064	5.81739	2.27886	CHROMOSOME_IV	13009111	13035852	+	WBGene00003150	mbk-2	cds
Y38A10A.5	4	4.80934	4.71869	5.41084	5.53636	6.22297	6.95815	7.15327	7.35388	7.40392	7.06295	2.68523	CHROMOSOME_V	6098976	6100536	-	WBGene00000802	crt-1	cds
W02B9.1	4	3.68677	4.27272	4.40763	4.08133	4.89781	5.37266	5.57389	5.91684	5.59386	5.44846	2.23007	CHROMOSOME_I	11075751	11134660	-	WBGene00001980	hmr-1	cds
Y71F9AM.6	4	4.62129	5.00874	5.15669	5.1804	5.64415	6.32631	6.37286	6.81594	6.62899	6.33622	2.19465	CHROMOSOME_I	2928395	2929681	+	WBGene00022122	trap-1	cds
F26E4.11	4	3.51123	4.08295	4.44164	4.03006	4.57409	5.09623	5.51565	5.63808	5.29201	4.8944	2.12686	CHROMOSOME_I	9793747	9796668	+	WBGene00009164	hrdl-1	cds
T12F5.5	4	3.3751	3.83152	3.90719	4.00469	4.22432	4.82584	5.21591	5.27151	5.00271	4.49047	1.8964	CHROMOSOME_I	3732985	3740482	-	WBGene00004147	larp-5	cds
T05E11.3	4	5.09241	5.45283	5.60701	5.4984	5.90423	6.21084	6.67135	6.71881	6.66085	6.38471	1.62641	CHROMOSOME_IV	11119323	11123133	+	WBGene00011480		cds
Y39A1A.7	4	2.40512	3.2339	3.42435	3.47793	3.69079	4.11014	5.08092	5.16448	4.93472	4.61925	2.75936	CHROMOSOME_III	10617770	10621270	-	WBGene00012646	lron-10	cds
C09B7.2	4	0	0.283709	0.533026	1.03987	1.06871	2.19955	3.18446	2.83331	2.27245	2.6755	3.18446	CHROMOSOME_X	2668129	2670584	+	WBGene00015621		cds
ZK154.6	4	0	0	0	0.370268	0.773209	1.26857	1.9477	1.71672	1.28344	1.52155	1.9477	CHROMOSOME_X	7790145	7793494	-	WBGene00022668		cds
F09E5.1	4	2.93915	3.13029	3.42149	3.40591	3.71171	4.15636	4.51732	4.28299	4.14801	4.47622	1.57818	CHROMOSOME_II	5380008	5384154	+	WBGene00004034	pkc-3	cds
Y48B6A.11	4	2.49312	2.26215	2.97274	3.24243	3.37942	4.21241	4.57539	4.46592	4.36436	4.51005	2.31324	CHROMOSOME_II	14234898	14243515	-	WBGene00012982	jmjd-2	cds
D2085.1	4	1.0899	0.283709	1.02631	2.22282	3.19049	3.79152	4.48665	4.78098	4.36291	4.44225	4.49727	CHROMOSOME_II	8651057	8658766	+	WBGene00004259	pyr-1	cds
LLC1.1	4	0.645513	0.675026	0.825618	1.4243	2.46624	3.21421	4.14221	4.39374	3.68847	3.74708	3.74823	CHROMOSOME_IV	14436337	14444156	-	WBGene00006606	tra-3	cds
T06E6.2	4	6.58505	6.5	6.29042	6.98382	7.40242	7.76433	8.40921	8.49718	8.31444	8.09633	2.20676	CHROMOSOME_V	15395677	15397331	+	WBGene00000868	cyb-3	cds
F02A9.3	4	5.75279	5.17245	5.74578	6.54551	6.75022	7.39349	8.65524	8.84578	8.46518	8.18252	3.67333	CHROMOSOME_III	9081602	9082813	+	WBGene00001386	far-2	cds
F46H5.7	4	0.748353	0.283709	0.723047	1.35388	1.31385	2.31638	2.93901	3.58008	2.73862	3.18342	3.29637	CHROMOSOME_X	7238632	7242917	-	WBGene00018522		cds
C09B8.4	4	0	0.283709	0.217437	0.925307	0.580478	1.76264	2.64005	2.8678	1.7555	1.66507	2.8678	CHROMOSOME_X	6018446	6019901	-	WBGene00015623		cds
Y48B6A.6	4	0	0	0.47108	0.783101	0.829417	1.7016	3.57957	3.2867	2.64025	2.2222	3.57957	CHROMOSOME_II	14178739	14189855	+	WBGene00012980		cds
Y102E9.5	4	0	0	0	0.39386	0.146475	0.578957	1.27832	1.30282	0.567086	0.980726	1.30282	CHROMOSOME_III	6728100	6730115	-	WBGene00044452		cds
C09G4.3	4	4.65555	4.88147	5.20915	5.21521	5.60152	5.67138	5.74982	6.02785	6.11277	6.25938	1.60383	CHROMOSOME_IV	8513906	8514711	+	WBGene00001051	cks-1	cds
Y46G5A.17	4	3.93075	3.92192	4.55588	4.46152	4.79637	5.01091	5.1009	5.43578	5.34277	5.55569	1.63377	CHROMOSOME_II	12787760	12796389	-	WBGene00012907	cpt-1	cds
W03D2.4	4	5.30209	5.49035	5.82297	5.68771	6.10732	6.19684	6.09938	6.30636	6.31656	6.5251	1.22301	CHROMOSOME_IV	4047922	4049443	-	WBGene00003955	pcn-1	cds
K07A3.1	4	2.31141	2.446	3.09432	3.06807	3.3754	3.7768	3.57839	3.81495	4.29375	4.38142	2.07002	CHROMOSOME_I	2580937	2586128	-	WBGene00001404	fbp-1	cds
F48E3.4	4	1.16618	1.42397	3.37701	4.12508	4.29458	5.11577	6.83683	7.04908	7.3053	7.05282	6.13912	CHROMOSOME_X	7493686	7495546	-	WBGene00018605		cds
R10E11.2	4	4.4768	4.71001	5.33223	5.41201	5.55506	5.97424	6.07896	6.18756	6.37488	6.33085	1.89808	CHROMOSOME_III	9782071	9783135	+	WBGene00006911	vha-2	cds
R01H2.6	4	5.39732	5.457	5.85311	6.01949	6.03871	6.06849	6.26025	6.41539	6.56249	6.46543	1.16516	CHROMOSOME_III	7067627	7068512	-	WBGene00006713	ubc-18	cds
T14G10.3	4	3.15603	3.37629	3.79774	3.70175	3.92829	3.987	4.25422	4.75123	4.65857	4.66669	1.5952	CHROMOSOME_IV	10158014	10159225	+	WBGene00011773	ttr-53	cds
T19H12.2	4	6.34482	6.54691	6.92388	6.86336	6.87334	6.96936	7.05849	7.4634	7.55964	7.5121	1.21482	CHROMOSOME_V	4890415	4891408	+	WBGene00020588		cds
F55C7.7	4	0	0	0.47108	0.183506	0.913667	1.08957	0.963749	1.30282	2.10711	1.55921	2.10711	CHROMOSOME_I	3999345	4031629	-	WBGene00006805	unc-73	cds
Y51H1A.2	4	1.89511	1.9939	2.50457	2.35547	2.9758	3.10575	3.02516	3.2867	3.74585	3.41395	1.85074	CHROMOSOME_II	13855713	13872222	-	WBGene00013093		cds
T14G10.4	4	0	0.283709	0.631163	0.183506	0.801587	1.01563	1.27832	1.40028	1.74658	1.27633	1.74658	CHROMOSOME_IV	10156101	10156749	+	WBGene00011774	ttr-54	cds
T06D10.2	4	4.29738	4.74252	4.82448	4.87931	5.09293	5.12728	5.40631	5.56239	5.92491	5.47333	1.62753	CHROMOSOME_I	9077559	9080017	-	WBGene00011532		cds
Y39E4A.3	4	3.02359	3.55327	3.394	3.98981	4.32602	4.43499	4.73906	5.03941	5.31039	4.91979	2.2868	CHROMOSOME_III	12967828	12972397	-	WBGene00012713		cds
T26C5.3	4	2.98199	3.72906	3.56238	3.58989	3.94664	4.24979	4.29042	4.36682	4.84035	4.56558	1.85836	CHROMOSOME_II	9236523	9249063	+	WBGene00012033		cds
Y49E10.6	4	5.7766	6.08772	6.12853	6.11531	6.24875	6.47111	6.43751	6.64795	6.90132	6.76644	1.12472	CHROMOSOME_III	12367374	12368949	-	WBGene00001946	his-72	cds
C36E8.5	4	6.78756	6.53885	6.52029	6.76206	7.08777	7.09682	7.13882	7.46619	7.58315	7.61201	1.09172	CHROMOSOME_III	4015748	4017622	-	WBGene00006537	tbb-2	cds
F09E5.15	4	5.72505	5.52666	5.37952	5.81263	6.42093	6.5445	6.72361	7.11926	7.39453	7.22205	2.01502	CHROMOSOME_II	5378046	5379619	+	WBGene00006434	prdx-2	cds
Y18D10A.20	4	6.49418	6.44585	6.28227	6.70259	6.95463	7.10723	7.22847	7.7581	7.96534	7.80229	1.68307	CHROMOSOME_I	12921991	12923535	+	WBGene00003989	pfn-1	cds
F26E4.8	4	5.58679	5.47952	5.68044	5.76936	6.34865	6.21547	6.33921	6.59611	6.77075	6.84937	1.36984	CHROMOSOME_I	9785769	9787615	-	WBGene00006528	tba-1	cds
ZK180.4	4	4.70603	4.46283	4.94949	4.86815	5.40454	5.32987	5.43785	5.42572	5.75578	5.68115	1.29295	CHROMOSOME_IV	4511886	4513314	-	WBGene00022678	sar-1	cds
C10G11.7	4	4.63636	4.45193	4.92363	4.75789	5.38371	5.40812	5.55973	5.91166	5.7769	5.69958	1.45973	CHROMOSOME_I	6284973	6289342	+	WBGene00015687		cds
R144.4	4	3.68525	3.64998	3.96086	3.77954	4.19323	4.21185	4.21784	4.75818	4.60372	4.63236	1.10819	CHROMOSOME_III	5018612	5021072	+	WBGene00020094	wip-1	cds
C24F3.1	4	4.51934	4.93351	5.28784	5.04453	5.69009	5.71167	5.90683	6.72648	6.2363	5.96644	2.20714	CHROMOSOME_IV	10219409	10221260	-	WBGene00007696	tram-1	cds
C34C12.4	4	1.70362	1.06116	1.72983	2.1082	2.53919	2.76726	3.02459	3.86283	3.25596	3.34064	2.80168	CHROMOSOME_III	3467282	3469814	-	WBGene00007923		cds
W09G3.6	4	3.68677	3.35361	3.64675	3.81433	4.37912	4.39254	4.48644	4.95364	4.69047	4.5972	1.60003	CHROMOSOME_I	13814739	13827969	-	WBGene00012369		cds
R02F11.4	4	3.31132	3.15739	3.34584	3.70325	3.85033	3.90485	3.88751	4.27659	4.05845	4.12076	1.1192	CHROMOSOME_V	4810913	4818649	-	WBGene00019842		cds
F37A4.9	4	4.60325	4.59183	4.92933	5.2972	5.77908	5.55631	5.89654	6.1669	5.99624	5.8459	1.57508	CHROMOSOME_III	6720360	6722205	-	WBGene00018137	bath-41	cds
Y41D4B.13	4	4.64892	4.6176	5.00627	5.21889	5.573	5.31962	5.77567	5.7988	5.78788	5.66358	1.1812	CHROMOSOME_IV	1597315	1601620	+	WBGene00000416	ced-2	cds
T24C4.6	4	4.09243	3.73464	4.43354	4.86172	5.07103	5.10214	5.55963	6.09224	5.77799	5.49481	2.3576	CHROMOSOME_III	881434	886780	-	WBGene00020762	zer-1	cds
T19A5.1	4	2.93915	3.12115	3.53236	3.59406	4.15678	4.00038	3.9328	4.56917	4.36728	4.09535	1.63002	CHROMOSOME_V	8957021	8961913	+	WBGene00020553		cds
Y37D8A.13	4	3.24459	3.10335	3.79758	4.06188	4.50108	4.42073	4.25397	4.93136	4.88856	4.64972	1.828	CHROMOSOME_III	12880940	12891637	-	WBGene00006804	unc-71	cds
C10H11.1	4	2.05943	2.34191	2.32318	2.30659	3.23355	3.67482	3.25748	3.73773	3.52487	3.0199	1.6783	CHROMOSOME_I	4747628	4759602	+	WBGene00015691	viln-1	cds
T02G6.5	4	0	0	0	0	1.33054	1.97129	1.75805	2.03796	1.94784	0.924125	2.03796	CHROMOSOME_I	11815902	11819265	+	WBGene00011388		cds
E04F6.11	4	0	0	0	0.514232	2.26661	2.99402	2.84542	3.87136	2.84957	2.31219	3.87136	CHROMOSOME_II	7217914	7225607	-	WBGene00000530	clh-3	cds
W03G1.6	4	3.58255	3.91211	3.70845	3.88982	4.44364	4.5461	4.57539	4.65074	4.57737	4.36025	1.06819	CHROMOSOME_IV	506732	519456	-	WBGene00021012	pig-1	cds
Y111B2A.15	4	2.13283	2.65954	2.65665	2.83409	3.48395	3.57866	3.6892	3.88826	3.69428	3.13437	1.75542	CHROMOSOME_III	12652243	12662168	-	WBGene00013737	tpst-1	cds
Y17G7B.2	4	2.73478	2.98018	2.62359	3.25654	3.54349	3.58366	3.79142	3.95801	3.88833	3.13437	1.33443	CHROMOSOME_II	11980362	11988797	+	WBGene00012458	ash-2	cds
C37A2.5	4	0	1.4802	0.825618	1.8064	2.22377	3.5791	3.6358	3.52712	3.10963	2.90891	3.6358	CHROMOSOME_I	6773995	6780152	-	WBGene00004111	pqn-21	cds
F54F2.2	4	2.70951	3.28275	3.28099	3.52337	3.86908	4.25837	4.60425	4.40553	4.18667	4.26788	1.89475	CHROMOSOME_III	8792766	8806193	+	WBGene00006975	zfp-1	cds
Y53C12A.1	4	4.59556	5.01086	4.78039	5.15434	5.33228	5.50106	5.69848	5.50872	5.34314	5.3644	1.10292	CHROMOSOME_II	9713602	9716410	-	WBGene00006940		cds
K08E4.3	4	0	0.859132	0.631163	1.45114	1.67586	1.99628	2.52728	2.54409	2.2631	1.7637	2.54409	CHROMOSOME_IV	12057604	12059930	+	WBGene00010667		cds
Y87G2A.7	4	2.27742	2.91894	2.47844	2.74932	3.199	3.37872	3.88878	3.81495	3.52226	3.43346	1.61136	CHROMOSOME_I	13572368	13575629	+	WBGene00013596		cds
F13G3.9	4	2.75961	3.21745	2.81089	3.64121	3.76431	3.88792	4.25422	4.22093	4.24923	4.10755	1.49461	CHROMOSOME_I	7312793	7313525	-	WBGene00003236	mif-3	cds
T01D1.4	4	0	1.23587	0.217437	1.89776	1.49141	2.35754	3.39505	3.60073	3.45365	3.24196	3.60073	CHROMOSOME_II	177000	179093	-	WBGene00020149		cds
F25B5.7	4	2.37329	3.42116	3.10787	3.57354	4.07348	4.11555	4.14221	4.10271	4.22031	3.93497	1.84701	CHROMOSOME_III	5953477	5958197	-	WBGene00017778	psf-1	cds
M03D4.1	4	2.46675	3.42116	3.00589	3.66806	4.07519	3.96785	4.3248	4.07346	4.018	4.10175	1.85805	CHROMOSOME_IV	6118213	6122066	+	WBGene00006974	zen-4	cds
R06C7.6	4	0	1.16902	0.631163	1.49543	2.20578	2.30433	2.52647	2.715	2.40385	2.37594	2.715	CHROMOSOME_I	7246076	7246812	-	WBGene00011065		cds
W01B6.9	4	2.73478	4.19394	3.2929	3.94568	4.51312	4.42764	4.32527	4.60798	4.45943	4.34954	1.87321	CHROMOSOME_IV	10086114	10088413	+	WBGene00003576	ndc-80	cds
C47G2.5	4	4.15708	4.43807	4.39099	4.76582	5.15054	5.17664	5.48464	5.75106	5.14311	5.05238	1.59398	CHROMOSOME_II	11297636	11301198	+	WBGene00008166	saps-1	cds
F58D5.4	4	3.56691	4.17671	3.98349	4.3402	4.57264	4.8148	4.81426	5.1714	4.60618	4.40654	1.60449	CHROMOSOME_I	12047331	12059791	-	WBGene00002240	ksr-2	cds
T24F1.2	4	2.93915	3.90147	3.87153	3.87313	4.62128	4.78116	4.83826	4.91908	4.25553	4.36025	1.97993	CHROMOSOME_II	11302825	11305616	+	WBGene00011994		cds
T27E9.3	4	3.04157	3.71741	3.53955	3.72371	4.05852	4.1272	4.06211	4.39374	3.93548	4.10146	1.35218	CHROMOSOME_III	13464583	13466289	-	WBGene00000407	cdk-5	cds
Y54E5B.1	4	1.48978	2.97003	2.36339	2.62612	3.3063	3.76594	3.84043	4.45751	3.39453	3.46311	2.96772	CHROMOSOME_I	14807456	14815703	+	WBGene00004889	smp-1	cds
Y59C2A.3	4	2.40512	3.19211	2.40869	3.07672	3.73711	3.75501	3.63505	4.10639	3.58149	3.37225	1.70126	CHROMOSOME_II	2215481	2219926	-	WBGene00021986		cds
F02E9.7	4	1.42915	2.37194	1.99542	3.20624	3.0613	3.51777	3.3279	3.88826	2.84331	2.89425	2.4591	CHROMOSOME_I	8413254	8416190	+	WBGene00008531		cds
B0286.4	4	4.96912	4.63972	5.12535	5.34825	5.96012	5.47283	5.14004	5.54516	5.7381	5.56487	1.32041	CHROMOSOME_II	4372744	4376745	-	WBGene00003825	ntl-2	cds
C06A6.4	4	3.55444	3.69338	3.82678	4.27946	4.85401	4.64606	4.01932	4.75358	4.39628	4.43168	1.29956	CHROMOSOME_IV	7826316	7829289	-	WBGene00015509		cds
C08F8.3	4	2.82889	2.80038	3.23793	3.70475	4.46572	3.88687	3.51902	4.20409	3.93352	4.03679	1.66534	CHROMOSOME_IV	11155008	11156674	+	WBGene00007445		cds
R74.3	4	3.02118	2.68369	3.39671	3.70733	4.68669	4.60925	3.63543	4.27659	4.32799	4.2562	2.003	CHROMOSOME_III	4193795	4195330	+	WBGene00006959	xbp-1	cds
ZC302.2	4	2.87508	2.87687	3.38836	3.98081	4.61818	4.80331	3.74069	4.33636	4.2195	4.21066	1.92823	CHROMOSOME_V	10737096	10739324	+	WBGene00013862		cds
T09A5.10	4	3.40689	3.39104	3.51693	4.13625	4.53691	4.07679	3.79108	4.32083	4.29222	3.87717	1.14587	CHROMOSOME_II	7860541	7863511	+	WBGene00002994	lin-5	cds
C03D6.6	4	0.645513	1.16902	2.02482	3.09122	4.38962	4.23039	3.10701	3.05167	3.69312	3.54901	3.7441	CHROMOSOME_I	9657049	9657841	-	WBGene00007278	lab-1	cds
C38D4.6	4	3.08151	3.37629	3.97222	4.18257	4.58243	4.56831	4.21859	4.27659	4.48263	4.42127	1.50091	CHROMOSOME_III	4804673	4808676	-	WBGene00003912	pal-1	cds
R07E5.3	4	3.53849	3.9068	4.08714	4.48256	4.65701	4.68407	4.35952	4.36988	4.78939	4.56074	1.2509	CHROMOSOME_III	4404741	4406257	+	WBGene00011111	snfc-5	cds
E01A2.1	4	2.68379	3.22539	3.30781	4.03638	4.41016	4.25987	3.977	3.58008	4.18006	4.25671	1.72637	CHROMOSOME_I	4139516	4142821	+	WBGene00017084		cds
F56D12.6	4	2.91724	3.29093	3.25365	3.67201	4.01533	3.91833	3.88751	3.84122	4.1842	4.00425	1.26696	CHROMOSOME_II	1310542	1320445	+	WBGene00018974		cds
F56F11.4	4	2.75961	3.11261	3.16155	4.31191	4.89579	4.34459	4.10258	4.19053	4.97325	4.64097	2.21364	CHROMOSOME_III	2855546	2865378	+	WBGene00018991		cds
W01A8.1	4	3.90872	4.08295	4.46576	5.55396	6.09607	5.73822	5.77533	5.72893	6.25619	5.93512	2.34747	CHROMOSOME_I	7057169	7059348	+	WBGene00007024	mdt-28	cds
F58F6.4	4	3.24459	3.27572	3.25365	3.92005	3.89807	4.04059	3.74069	3.75625	4.33098	3.93497	1.08639	CHROMOSOME_IV	1347316	1352980	+	WBGene00004338	rfc-2	cds
F56D1.4	4	2.96072	3.0664	3.04202	3.38919	3.71545	4.11585	3.63505	3.71896	3.8944	3.84738	1.15512	CHROMOSOME_II	5466344	5473788	+	WBGene00000548	clr-1	cds
T09B4.10	4	2.93915	3.13029	2.96152	3.58058	3.73192	4.07679	3.63467	3.75625	3.88529	3.97669	1.13764	CHROMOSOME_I	6181316	6183882	-	WBGene00000500	chn-1	cds
T05F1.2	4	3.438	3.28275	3.79758	5.02937	6.07913	6.14631	5.46935	5.92609	5.99671	5.6141	2.86357	CHROMOSOME_I	9622540	9624717	+	WBGene00011489		cds
VF13D12L.1	4	2.24261	1.84953	1.95809	3.42503	4.55246	4.3944	3.84043	4.4993	4.35486	4.23968	2.70293	CHROMOSOME_II	11698253	11700243	-	WBGene00012148	inos-1	cds
ZK675.1	4	4.13938	4.06944	4.47772	5.25066	5.94734	6.007	5.97389	6.50175	6.20961	5.82127	2.43231	CHROMOSOME_II	7893178	7900433	+	WBGene00004208	ptc-1	cds
B0240.4	4	3.80797	4.53886	4.10611	4.13864	4.76195	4.85021	4.71298	4.95364	5.30698	5.07205	1.49901	CHROMOSOME_V	11730974	11733461	-	WBGene00007118	npp-22	cds
F31E3.4	4	2.80523	3.13096	2.87598	2.772	3.54768	3.76632	3.74174	4.33019	4.18172	4.06324	1.55819	CHROMOSOME_III	6963567	6968059	-	WBGene00017951	panl-2	cds
Y105E8B.8	4	3.40689	3.86358	3.72861	3.35545	3.90463	4.21479	4.06183	4.4375	4.68873	4.48113	1.33328	CHROMOSOME_I	14664438	14674811	+	WBGene00001334	ero-1	cds
K08C7.6	4	0	0.52069	0	0	0.883516	0.472435	0.963749	0.863753	1.53351	1.40414	1.53351	CHROMOSOME_IV	10684412	10685874	-	WBGene00010648		cds
C29E4.15	4	0	0	0.406354	0	1.09187	1.63787	1.28024	1.40028	0.957729	1.63011	1.63787	CHROMOSOME_III	7952592	7955759	+	WBGene00045246		cds
C56A3.4	4	3.72362	3.90108	4.17098	3.89416	4.42627	4.68023	4.35861	4.61815	4.41981	4.75713	1.03351	CHROMOSOME_V	13550506	13551762	-	WBGene00008343		cds
R03D7.1	4	2.93915	3.5401	3.44605	3.15161	4.05929	4.15022	3.9331	4.20752	3.74473	4.42705	1.48791	CHROMOSOME_II	10926501	10931017	+	WBGene00010988	metr-1	cds
F10G7.10	4	0	0	0	0	1.95055	1.9055	1.9477	1.35238	1.27726	2.75805	2.75805	CHROMOSOME_II	4713670	4726259	-	WBGene00017373		cds
K07A1.2	4	4.36177	4.79972	4.48165	4.68293	5.61302	5.8394	5.81332	5.6052	5.94322	6.64649	2.28472	CHROMOSOME_I	9585309	9587198	+	WBGene00010609	dut-1	cds
T23G5.1	4	4.72507	4.75144	4.8755	5.12684	5.66864	5.8014	5.53026	5.73008	5.98721	6.24376	1.51869	CHROMOSOME_III	9225295	9228707	-	WBGene00004391	rnr-1	cds
F29C4.7	4	3.3133	3.98304	3.76988	3.58896	4.1666	4.34049	3.88846	4.03217	4.29528	4.42683	1.11353	CHROMOSOME_IV	121791	126225	-	WBGene00017929	grld-1	cds
Y102E9.2	4	4.60929	4.90811	4.87348	4.72518	5.16076	5.18345	5.1009	5.07493	5.28856	5.68532	1.07603	CHROMOSOME_III	6725732	6728003	+	WBGene00022420		cds
ZK973.9	4	2.87508	3.36859	3.26557	3.25332	3.58262	3.59597	3.68956	3.39127	3.84691	4.01754	1.14246	CHROMOSOME_I	4370443	4372137	-	WBGene00022835		cds
B0393.3	4	3.55277	3.84309	4.18215	4.30994	4.71604	4.64824	4.79019	4.73263	4.35559	4.77707	1.23742	CHROMOSOME_III	4757213	4759696	+	WBGene00007168		cds
T23D8.7	4	2.73478	2.99955	3.25962	3.51801	3.94346	3.94203	3.9328	4.16303	3.63476	3.93497	1.42825	CHROMOSOME_I	9989790	9994005	+	WBGene00011945	hpo-24	cds
C36B1.11	4	2.05943	2.32608	2.96491	3.37148	4.08313	4.20595	4.06211	4.07708	3.73349	4.47578	2.41635	CHROMOSOME_I	8755837	8757599	-	WBGene00007978		cds
F26H9.1	4	3.68525	4.12015	4.25	4.42763	4.83868	4.72918	4.65918	4.9874	4.21547	4.70881	1.30215	CHROMOSOME_I	9287439	9290144	+	WBGene00009173	prom-1	cds
Y69A2AR.30	4	3.39109	3.77602	3.87959	4.09235	4.31166	4.44636	4.25373	4.55337	3.97064	4.39594	1.16228	CHROMOSOME_IV	2636229	2641115	-	WBGene00003161	mdf-2	cds
K07A1.8	4	1.97712	2.37194	2.55022	2.87124	3.25802	3.3634	3.02344	3.65613	3.1896	3.22982	1.67901	CHROMOSOME_I	9609494	9611590	-	WBGene00002070	ile-1	cds
Y94H6A.3	4	2.57934	2.87766	2.93108	3.27254	3.3571	3.49604	3.39594	4.03217	3.32841	3.6725	1.45283	CHROMOSOME_IV	2676510	2678835	+	WBGene00022376		cds
W07B3.2	4	1.80254	2.32723	2.77257	2.7826	3.12858	4.09576	3.46007	3.55913	3.26067	3.47301	2.29322	CHROMOSOME_III	344298	348608	-	WBGene00001561	gei-4	cds
Y67D8C.10	4	2.05943	2.17901	2.41365	2.73846	2.67376	3.16811	2.93778	3.13202	2.53209	3.07235	1.10868	CHROMOSOME_IV	3103531	3133141	-	WBGene00003153	mca-3	cds
F52G2.1	4	2.01886	1.71363	2.58499	2.89059	2.75069	3.16376	3.10701	3.83252	2.74759	3.70608	2.11889	CHROMOSOME_IV	13513345	13521848	-	WBGene00003582	dcap-2	cds
Y54G2A.26	4	4.00411	3.82026	4.2157	4.44698	4.59487	4.68448	4.88557	5.34378	4.28838	4.82001	1.52353	CHROMOSOME_IV	2986082	2995571	-	WBGene00021890		cds
C25D7.10	4	1.80254	2.22848	2.73353	2.72457	2.75284	2.99467	3.02459	3.26099	2.39817	3.08474	1.45845	CHROMOSOME_V	15067446	15068556	+	WBGene00007720		cds
T28D6.9	4	2.20693	2.89845	3.47019	3.82384	3.73246	4.1616	3.79176	4.19053	2.93111	4.00334	1.9836	CHROMOSOME_III	11343184	11344137	+	WBGene00003975	pen-2	cds
F09E5.3	4	3.49653	3.89612	4.53825	4.65579	4.42197	4.81286	4.54655	4.96165	4.18832	4.48091	1.46512	CHROMOSOME_II	5373978	5375161	+	WBGene00017283		cds
R01H10.8	4	2.68379	2.98954	3.20358	3.25332	3.106	3.46011	3.10647	3.71896	3.10789	3.34113	1.03517	CHROMOSOME_III	10271166	10278488	+	WBGene00000564	cnk-1	cds
F56G4.4	4	2.80523	3.02919	3.35424	2.99491	3.52107	3.83242	3.63543	4.02455	3.10789	3.36163	1.21932	CHROMOSOME_I	11374616	11380125	+	WBGene00010159		cds
C01F1.6	4	0.748353	0.283709	2.42472	2.16415	2.40933	2.69121	2.93778	3.2348	2.40951	2.39689	2.95109	CHROMOSOME_II	4282281	4288212	-	WBGene00015301		cds
C07G1.5	4	2.40512	2.31124	2.92705	3.05333	3.12214	3.26243	3.18343	3.44375	3.10441	3.07235	1.13251	CHROMOSOME_IV	8201365	8206034	-	WBGene00004101	hgrs-1	cds
ZK1307.8	4	3.58091	3.19147	3.94385	3.8851	4.26423	4.5501	4.42394	4.80795	4.5232	4.0304	1.61647	CHROMOSOME_II	9624531	9626569	+	WBGene00014249		cds
C50F4.7	4	1.16618	0.283709	1.2401	1.49941	1.29695	2.17673	2.11313	2.50079	2.11753	1.94278	2.21709	CHROMOSOME_V	9547042	9547585	+	WBGene00001911	his-37	cds
B0024.13	4	1.48978	3.49228	3.38563	3.4253	3.96243	3.92159	4.10203	3.61612	4.0217	3.62081	2.61225	CHROMOSOME_V	10320690	10322190	+	WBGene00007102		cds
Y43F4B.9	4	0.645513	2.55573	2.37484	2.46788	2.86862	2.64291	2.93717	2.32557	2.94287	2.70864	2.29735	CHROMOSOME_III	13314987	13318501	+	WBGene00012806		cds
C39E9.11	4	3.48168	4.28156	4.28507	4.5974	4.43595	4.62398	4.73924	4.37588	4.79373	4.48581	1.31205	CHROMOSOME_IV	13091160	13093820	-	WBGene00008034		cds
F12F6.6	4	1.80254	3.11261	3.5672	3.76973	3.64107	3.8738	3.79176	3.39127	3.88934	3.64688	2.0868	CHROMOSOME_IV	11561967	11566168	-	WBGene00004755		cds
Y73B6A.5	4	1.97712	3.28334	3.76569	3.92282	3.90136	4.03187	4.25495	3.94999	4.2516	3.84772	2.27784	CHROMOSOME_IV	6742527	6748413	-	WBGene00003030	lin-45	cds
F12F6.5	4	2.09889	3.46414	3.72629	3.70561	4.04705	3.81775	4.02047	3.80609	4.29145	3.892	2.19256	CHROMOSOME_IV	11570489	11578689	+	WBGene00006406	srgp-1	cds
F48E8.7	4	2.34075	3.56005	4.01626	3.77872	4.13825	4.13876	4.14247	3.99748	4.39271	3.90636	2.05196	CHROMOSOME_III	5446470	5448380	-	WBGene00018613	skpt-1	cds
F25D7.1	4	3.68525	4.54546	4.81734	4.82561	5.0412	4.90868	5.03969	4.74196	5.41002	4.82371	1.72477	CHROMOSOME_I	10398975	10400186	-	WBGene00000843	cup-2	cds
M01H9.3	4	3.96193	4.83828	5.07991	5.13633	5.23406	5.13403	5.15962	4.99131	5.4406	4.9653	1.47867	CHROMOSOME_IV	4468495	4477054	-	WBGene00019719		cds
F52E1.10	4	3.27935	4.11948	4.42947	4.646	4.83399	4.57355	4.54715	4.52123	4.90833	4.64535	1.62898	CHROMOSOME_V	8411756	8413469	-	WBGene00018698	vha-18	cds
C35D10.10	4	1.42915	2.93989	3.30471	3.22281	3.08799	3.68558	3.79176	3.22153	3.32392	3.62041	2.36261	CHROMOSOME_III	4860645	4861760	-	WBGene00016446		cds
F52F12.7	4	1.54797	2.9197	3.09407	2.83839	3.11168	3.15153	3.39505	2.8678	3.10091	3.34064	1.84709	CHROMOSOME_I	9928970	9930884	+	WBGene00009940		cds
W02B12.2	4	3.88634	5.0401	5.33228	5.13251	5.25862	5.47728	5.51545	4.9854	5.47089	5.48239	1.62911	CHROMOSOME_II	11451380	11452891	-	WBGene00004699	rsp-2	cds
W03C9.2	4	2.87508	3.80403	4.18057	4.12508	4.23591	4.34804	4.35816	3.92965	4.29451	4.37569	1.50061	CHROMOSOME_II	11962047	11965191	+	WBGene00012220		cds
T07A5.6	4	2.34075	3.94764	4.04856	3.91265	3.84983	4.19278	4.51732	3.74702	4.42681	4.1262	2.17657	CHROMOSOME_III	10318890	10319930	+	WBGene00006802	unc-69	cds
C53B4.4	4	3.26207	4.32515	4.63931	4.52506	4.6581	5.09303	4.90857	4.81238	5.04359	4.73747	1.83096	CHROMOSOME_IV	8975517	8984554	+	WBGene00008274		cds
T12G3.7	4	0.645513	3.0095	3.42435	3.24037	3.891	4.32306	4.10285	3.7882	4.45807	4.23361	3.81255	CHROMOSOME_IV	12026861	12029152	-	WBGene00011742		cds
Y43F4B.7	4	0	1.73777	2.50457	1.71229	2.17357	2.77526	2.93656	2.0973	2.75205	2.437	2.93656	CHROMOSOME_III	13307397	13313292	+	WBGene00012804		cds
B0035.2	4	1.42915	2.17773	2.22621	2.29808	2.46754	2.71397	2.4014	2.24914	2.52949	2.41663	1.28482	CHROMOSOME_IV	11312451	11313954	-	WBGene00001020	dnj-2	cds
F57C2.2	4	1.80254	2.78972	3.01677	2.83251	3.37679	3.32344	2.93717	2.85066	3.51964	3.13492	1.7171	CHROMOSOME_II	14520924	14522046	-	WBGene00010194	btb-19	cds
Y43F8C.12	4	1.97712	3.2339	3.39692	3.35545	4.10195	4.09804	3.6892	3.67573	4.25946	3.86286	2.28234	CHROMOSOME_V	19674813	19693014	+	WBGene00003413	mrp-7	cds
C52E12.3	4	2.4632	3.71133	4.06621	3.97033	4.15961	4.50856	4.14168	3.88826	4.2571	4.61945	2.15625	CHROMOSOME_II	7010756	7012650	-	WBGene00005025	sqv-7	cds
Y39C12A.8	4	1.84957	2.54309	2.86035	2.72627	3.15488	3.1565	3.02574	2.69594	3.10615	3.25247	1.4029	CHROMOSOME_IV	12251161	12252641	-	WBGene00001044	dnj-26	cds
R02D3.7	4	1.97712	3.35418	3.53464	3.62883	3.83719	4.38944	3.45964	3.35526	4.01336	4.18077	2.41233	CHROMOSOME_IV	253568	255429	-	WBGene00019824		cds
Y41E3.7	4	2.93915	3.79872	3.71965	3.67858	4.01845	4.09804	3.79176	3.75625	4.10218	4.16919	1.23004	CHROMOSOME_IV	15014010	15025485	+	WBGene00012765		cds
C27D9.1	4	0	2.01381	3.00589	2.76749	4.14421	3.83097	3.02574	2.69594	3.03233	3.09759	4.14421	CHROMOSOME_II	4753439	4755596	+	WBGene00016163		cds
F54E12.2	4	4.08378	5.08445	5.49252	5.44434	5.9603	5.63668	5.50038	5.41553	5.61776	5.63179	1.87652	CHROMOSOME_IV	11333056	11337162	-	WBGene00010061		cds
K04G2.6	4	0.645513	2.14332	2.75967	2.93842	3.30191	2.99402	2.4014	2.54409	3.18795	2.99264	2.6564	CHROMOSOME_I	8040792	8043275	+	WBGene00010565		cds
T24H7.4	4	1.42915	3.37685	4.28496	4.35844	4.58326	4.63616	4.02076	3.88826	4.74106	4.47644	3.31191	CHROMOSOME_II	6245100	6246226	+	WBGene00020783		cds
R10E11.4	4	2.24261	3.57304	4.03618	3.99245	4.45236	4.47645	3.88846	3.92147	4.25317	4.49069	2.24808	CHROMOSOME_III	9778237	9780233	-	WBGene00005021	sqv-3	cds
F25B4.5	4	2.75961	3.83152	3.97961	3.6599	3.95613	4.02455	4.06267	3.55913	3.93352	3.8775	1.30306	CHROMOSOME_V	5678582	5682617	-	WBGene00017768		cds
F54D10.5	4	2.37329	3.47802	3.72646	3.44802	3.74563	3.95768	3.93372	3.02135	3.69196	3.94211	1.58439	CHROMOSOME_II	3807098	3808225	-	WBGene00018806		cds
R01H10.7	4	0.645513	2.52932	3.02433	3.08761	3.39018	3.37872	3.39594	2.00735	3.02498	3.1224	2.75043	CHROMOSOME_III	10261667	10267290	-	WBGene00010975		cds
C05D11.12	4	2.40512	3.47136	3.79348	3.75221	4.24445	4.29181	4.57539	3.92147	4.63564	4.57939	2.23051	CHROMOSOME_III	6444640	6446891	-	WBGene00002855	let-721	cds
F28B12.3	4	2.78402	3.81501	3.89751	4.27686	4.60988	4.61975	4.60444	4.01689	4.84244	4.64097	2.05842	CHROMOSOME_II	5921942	5924816	+	WBGene00017895	vrk-1	cds
C32A3.3	4	1.97712	3.09404	3.13484	3.2545	3.7863	3.52638	3.84108	3.36736	4.35925	3.77028	2.38214	CHROMOSOME_III	3636028	3643654	+	WBGene00007860	rilp-1	cds
Y74C10AL.2	4	3.54018	3.82067	4.15949	4.28477	4.20054	4.25525	4.35838	4.0548	4.60433	4.3011	1.06415	CHROMOSOME_I	2468789	2471974	-	WBGene00022280		cds
F23F1.8	4	4.43886	5.03333	5.10574	5.67501	5.63066	5.55066	5.50049	5.30964	5.86194	5.80006	1.42307	CHROMOSOME_II	42207	46216	-	WBGene00004504	rpt-4	cds
R06C1.2	4	2.37329	3.05754	2.93108	3.51336	3.57731	3.37346	3.57839	3.2867	3.84169	3.89233	1.51904	CHROMOSOME_I	11917733	11923906	-	WBGene00011058	fdps-1	cds
T04A8.7	4	2.34461	2.96055	3.69733	4.41746	4.60355	4.16711	4.51691	4.3425	5.10369	5.11004	2.76542	CHROMOSOME_III	4695324	4697976	+	WBGene00011409		cds
K07C5.1	4	3.31132	4.22842	4.3627	4.87693	4.7586	4.82759	4.76468	4.62073	5.02006	5.4185	2.10718	CHROMOSOME_V	10335241	10338334	-	WBGene00000200	arx-2	cds
ZK112.2	4	1.54797	2.96055	3.54237	3.73845	3.76632	3.95483	3.57879	3.65613	4.11089	4.51963	2.97166	CHROMOSOME_III	7731322	7737641	+	WBGene00003559	ncl-1	cds
Y39G10AR.9	4	2.73478	3.68098	4.00538	4.0815	4.27231	4.1181	3.9773	3.73773	4.45738	4.42195	1.72261	CHROMOSOME_I	2306987	2308973	+	WBGene00021467		cds
Y41C4A.10	4	3.19297	3.97835	4.52058	4.84596	4.83837	4.82759	4.60406	4.40553	4.99989	5.10382	1.91085	CHROMOSOME_III	11718736	11719352	-	WBGene00001235	elb-1	cds
C27A12.6	4	2.27742	3.19147	3.05975	3.18242	3.55665	3.45016	3.39505	3.11776	3.63597	3.74672	1.4693	CHROMOSOME_I	6053599	6055825	-	WBGene00016156		cds
R06F6.9	4	1.54797	2.77813	2.78535	2.9794	3.78828	3.44014	3.45879	2.85066	3.5752	3.977	2.42903	CHROMOSOME_II	10820970	10822635	+	WBGene00001153	ech-4	cds
F44C4.4	4	1.48978	3.0671	3.13159	3.46279	3.7149	3.35376	3.68847	3.00595	3.52095	4.18707	2.69728	CHROMOSOME_V	6606418	6611146	-	WBGene00002148	gon-14	cds
ZK328.5	4	4.01325	4.76619	4.81625	4.80175	5.12665	4.86116	5.01884	4.75818	4.97849	5.12553	1.1134	CHROMOSOME_III	6013446	6019503	-	WBGene00003796	npp-10	cds
C52E12.4	4	2.73478	3.69338	3.74392	3.8187	3.87056	3.59962	3.7921	3.72837	3.84273	4.31217	1.57739	CHROMOSOME_II	7012753	7022467	-	WBGene00016889		cds
F21H11.2	4	1.54797	2.75466	2.93854	3.25097	3.31746	3.12227	3.45879	2.81575	3.40873	4.31217	2.7642	CHROMOSOME_III	5109662	5130636	+	WBGene00004728	sax-2	cds
F26F4.3	4	0	1.23587	1.31253	1.6513	1.8414	1.4278	1.94649	1.35238	2.11753	2.5339	2.5339	CHROMOSOME_III	4907190	4908786	+	WBGene00004400	rom-1	cds
C27B7.1	4	3.59478	4.79993	4.8814	4.85324	5.14839	5.03339	4.81359	4.81455	5.53093	5.71036	2.11558	CHROMOSOME_IV	8891457	8892734	+	WBGene00005007	spr-2	cds
D2092.2	4	3.10108	3.63125	3.83525	3.66741	4.12708	3.91799	3.74104	3.70464	4.17841	4.39641	1.29533	CHROMOSOME_I	6625063	6626858	-	WBGene00017064	ppfr-2	cds
Y45G5AL.1	4	3.92107	4.62338	4.85033	4.75261	5.09854	5.07023	5.05968	4.7719	5.20255	5.63188	1.71081	CHROMOSOME_V	4144491	4147560	+	WBGene00021554		cds
ZK370.5	4	2.85217	3.72863	3.89942	3.62702	4.2032	3.92159	4.02076	3.55913	4.22272	4.64972	1.79756	CHROMOSOME_III	8737128	8741333	-	WBGene00022719	pdhk-2	cds
B0273.2	4	2.78402	3.84744	4.14122	4.67244	5.10772	4.89546	4.95321	5.08782	4.76515	4.97214	2.3237	CHROMOSOME_IV	5486676	5490322	+	WBGene00004243	puf-7	cds
T01H3.4	4	2.09889	3.22601	3.70173	4.30103	4.83227	4.69616	4.65992	4.69227	4.60248	4.56516	2.73338	CHROMOSOME_II	7880759	7882716	+	WBGene00011350	perm-1	cds
F54D5.14	4	4.27273	4.80829	4.94842	5.13219	5.46923	5.33258	5.23499	5.38755	5.32292	5.38517	1.1965	CHROMOSOME_II	11578650	11582692	+	WBGene00010056	smc-6	cds
F57B10.3	4	1.80254	2.99955	3.394	3.80916	4.09422	4.13284	4.21784	4.24736	4.02354	4.37064	2.5681	CHROMOSOME_I	6569495	6572601	+	WBGene00019001		cds
T14G10.7	4	2.09889	3.20822	3.64658	4.07056	4.17867	4.1979	4.21809	4.47713	4.18089	4.4117	2.37824	CHROMOSOME_IV	10147009	10149018	-	WBGene00011776	hpo-5	cds
K04G2.8	4	2.40512	3.33848	3.67707	3.88074	4.13102	4.09774	4.35838	4.08082	4.10218	4.33357	1.95326	CHROMOSOME_I	8050038	8055469	+	WBGene00000156	`tx-01	cds
Y42H9B.3	4	4.36177	5.26414	5.45361	5.67835	5.79792	5.79143	5.86063	5.80662	5.78652	5.94373	1.58196	CHROMOSOME_IV	8011017	8012419	-	WBGene00021541		cds
C04A2.7	4	2.91724	4.62709	5.08773	5.17932	5.46558	5.47728	5.73711	5.98918	5.60416	5.8626	3.07194	CHROMOSOME_II	6853426	6858255	-	WBGene00001023	dnj-5	cds
F52F12.3	4	0	1.8272	2.45183	2.65438	3.15875	3.3596	3.57918	3.74702	3.57646	3.7224	3.74702	CHROMOSOME_I	9895683	9900810	-	WBGene00003396	mom-4	cds
T24A11.1	4	1.23863	2.90911	3.53217	3.51435	3.95157	3.97068	4.54655	4.56134	4.29528	4.4616	3.3227	CHROMOSOME_III	3789964	3800447	-	WBGene00003476	mtm-3	cds
C14B1.9	4	2.96072	4.07384	4.34112	4.27427	4.75477	4.75559	4.81392	5.12219	4.81643	5.07515	2.16146	CHROMOSOME_III	3725056	3726484	-	WBGene00007580		cds
F52E1.13	4	3.02118	3.59303	3.84536	3.80036	4.07562	4.00005	4.02047	4.17685	4.1048	4.15108	1.15567	CHROMOSOME_V	8415668	8444752	-	WBGene00018700		cds
Y62E10A.14	4	2.13283	3.36084	4.01991	4.0464	4.6298	4.4853	4.60425	4.84737	4.71713	4.7251	2.71453	CHROMOSOME_IV	13399043	13400489	-	WBGene00013380		cds
F29C12.3	4	1.48978	3.29152	3.54726	3.9801	4.23553	4.4138	4.63216	4.91496	4.93668	4.66256	3.4469	CHROMOSOME_II	13098179	13116731	-	WBGene00009245	rict-1	cds
R13A5.1	4	2.01886	3.2339	3.80608	3.44237	4.08346	4.21479	4.14194	4.13846	4.06295	4.21066	2.19593	CHROMOSOME_III	7584114	7591512	+	WBGene00000846	cup-5	cds
T05A6.2	4	3.52578	4.54279	4.81118	4.60983	5.39909	5.36833	5.43817	5.48806	5.28856	5.35385	1.96228	CHROMOSOME_II	7816458	7820227	+	WBGene00000517	cki-2	cds
C10F3.1	4	1.70362	3.47084	3.85949	4.02372	4.63317	4.55431	4.54655	4.72795	4.60865	4.25046	3.02432	CHROMOSOME_V	5996340	5999329	+	WBGene00015677	cpg-4	cds
K08F9.4	4	1.84957	2.98018	3.01677	3.23711	3.56908	3.52682	3.6892	3.74702	3.57646	3.37225	1.89745	CHROMOSOME_V	15144047	15146414	+	WBGene00010687		cds
F54D7.2	4	0	2.2126	2.38034	2.75388	2.88295	3.14596	3.32884	3.31197	3.25754	3.13437	3.32884	CHROMOSOME_I	4805606	4809675	+	WBGene00018797		cds
Y110A2AL.14	4	2.20693	3.91134	4.02194	4.2079	4.40091	4.75925	4.60425	4.64334	4.39128	4.38072	2.55231	CHROMOSOME_II	2889108	2894401	-	WBGene00005020	sqv-2	cds
B0336.5	4	1.16618	2.99955	3.76988	4.04894	4.30241	4.56314	5.08106	4.27659	4.57423	4.53776	3.91488	CHROMOSOME_III	5692875	5693893	+	WBGene00015145		cds
F25B3.6	4	2.43626	3.96781	4.18552	4.4232	4.47554	4.61392	5.21616	4.72795	4.7646	4.8944	2.7799	CHROMOSOME_V	9580017	9582620	-	WBGene00009103		cds
C39F7.4	4	1.48978	2.86676	3.23816	3.58033	3.76991	3.76995	3.63505	3.76543	4.06385	3.8775	2.57406	CHROMOSOME_V	1262621	1263992	-	WBGene00004266	rab-1	cds
[truncated: 4,058 more rows]

## Sheet: Male
Male dynamic transcript groups
Transcript expression levels [Tabls S2A] were increased by 1 and log2 transformed
Dynamic transcripts were defined as having a fold difference across sections of ≥2 (log2 >1).
Open reading frame	group ID	1	2	3	4	5	6	7	8	9	10	diffExp	chromosome	chrom_start	chrom_end	strand	wbgene	Gene name	type
ZC443.4	12	0	0	0	0	0	0	0	0.480185	2.34302	0	2.34302	CHROMOSOME_V	12816904	12819528	-	WBGene00013899		cds
ZC506.1	12	0	0	0	0	0	0	0	0.480185	2.34302	0	2.34302	CHROMOSOME_X	9958897	9964685	+	WBGene00013919		cds
F07C3.7	12	0	0	0	0	0	0	0	0.480185	2.34302	0	2.34302	CHROMOSOME_V	9244389	9246337	-	WBGene00000003	aat-2	cds
F11F1.1	12	0	0	0	0	0	0	0	0.480185	2.34302	0	2.34302	CHROMOSOME_III	13395605	13400505	+	WBGene00008714		cds
F52E4.8	12	0	0	0	0	0	0	0	0.480185	2.34302	0	2.34302	CHROMOSOME_X	3100103	3102222	-	WBGene00018704	ztf-13	cds
C07H4.1	12	0	0	0	0	0	0	0	0.480185	2.34302	0	2.34302	CHROMOSOME_II	9091047	9093634	-	WBGene00007421		cds
H13N06.3	12	0	0	0	0	0	0	0	0.480185	2.34302	0	2.34302	CHROMOSOME_X	15493468	15497400	+	WBGene00001649	gob-1	cds
K09E9.3	12	0	0	0	0	0	0	0	0.480185	2.34302	0	2.34302	CHROMOSOME_X	15611756	15613723	-	WBGene00010726		cds
C45E5.6	12	0	0	0	0	0	0	0	0.480185	2.34302	0	2.34302	CHROMOSOME_IV	5747371	5757851	-	WBGene00003636	nhr-46	cds
K08E3.1	12	0	0	0	0	0	0	0	0.480185	2.34302	0	2.34302	CHROMOSOME_III	13744121	13747186	+	WBGene00010661	tyr-2	cds
K09C4.10	12	0	0	0	0	0	0	0	0.480185	2.34302	0	2.34302	CHROMOSOME_X	3275997	3280187	-	WBGene00019554		cds
C06C6.5	12	0	0	0	0	0	0	0	0.480185	2.34302	0	2.34302	CHROMOSOME_V	15997759	16000633	-	WBGene00003640	nhr-50	cds
T19A5.4	12	0	0	0	0	0	0	0	0.480185	2.34302	0	2.34302	CHROMOSOME_V	8961880	8964077	-	WBGene00003634	nhr-44	cds
C44C1.2	12	0	0	0	0	0	0	0	0.480185	2.34302	0	2.34302	CHROMOSOME_X	957883	960564	+	WBGene00016642		cds
T08G2.3	12	0	0	0	0	0	0	0	0.480185	2.34302	0	2.34302	CHROMOSOME_X	17213067	17214855	-	WBGene00020366	acdh-10	cds
F13B9.1	12	0	0	0	0	0	0	0	0.480185	2.34302	0	2.34302	CHROMOSOME_X	8287209	8294463	+	WBGene00017419		cds
C05E11.1	12	0	0	0	0	0	0	0	0.480185	2.34302	0	2.34302	CHROMOSOME_X	4588739	4590420	+	WBGene00015492	lnp-1	cds
F47B7.2	12	0	0	0	0	0	0	0	0.480185	2.34302	0	2.34302	CHROMOSOME_X	3772747	3778065	+	WBGene00018533		cds
F47B8.8	12	0	0	0	0	0	0	0	0.480185	2.34302	0	2.34302	CHROMOSOME_V	14331694	14332654	+	WBGene00009809		cds
F46H6.1	12	0	0	0	0	0	0	0	0.480185	2.34302	0	2.34302	CHROMOSOME_X	4508480	4510936	+	WBGene00004356	rhi-1	cds
C03G5.1	12	0	0	0	0	0	0	0	0.480185	2.34302	0	2.34302	CHROMOSOME_X	8542814	8545974	-	WBGene00015391	sdha-1	cds
T26E3.2	12	0	0	0	0	0	0	0	0.482963	2.34302	0	2.34302	CHROMOSOME_I	12679201	12681805	+	WBGene00003578	ndx-1	cds
ZK637.13	12	0	0	0	0	0	0	0	0.482963	2.34302	0	2.34302	CHROMOSOME_III	8922321	8923350	-	WBGene00014030	glb-1	cds
C52D10.11	12	0	0	0	0	0	0	0	0.480185	2.55562	0	2.55562	CHROMOSOME_IV	17190168	17191855	-	WBGene00001460	flp-17	cds
Y77E11A.2	12	0	0	0	0	0	0	0	0.480185	2.55562	0	2.55562	CHROMOSOME_IV	1457074	1459524	+	WBGene00022307		cds
C03A3.2	12	0	0	0	0	0	0	0	0.839835	3.31511	0	3.31511	CHROMOSOME_X	11262781	11266247	+	WBGene00007267		cds
H20J18.1	12	0	0	0	0	0	0	0	0.839835	3.31511	0	3.31511	CHROMOSOME_X	12503893	12513979	-	WBGene00004739	scd-1	cds
T01E8.8	12	0	0	0	0	0	0	0	0.839835	3.31511	0	3.31511	CHROMOSOME_II	10231249	10235954	+	WBGene00011335		cds
F39B1.1	12	0	0	0	0	0	0	0	0.839835	3.42739	0	3.42739	CHROMOSOME_X	15234763	15246296	-	WBGene00009552	piki-1	cds
R03E9.1	12	0	0	0	0	0	0	0	0.842001	3.53156	0	3.53156	CHROMOSOME_X	6742354	6743863	+	WBGene00003163	mdl-1	cds
C42D4.4	12	0	0	0	0	0	0	0	0.480185	3.81008	0	3.81008	CHROMOSOME_IV	7177175	7178411	+	WBGene00006109	str-44	cds
Y43F8C.13	12	0	0	0	0	0	0	0	0.480185	3.19335	0	3.19335	CHROMOSOME_V	19693866	19697368	-	WBGene00012834		cds
Y65B4BR.3	12	0.400478	0	0.282331	0.60634	0.341141	0	0	1.12748	4.30095	0	4.30095	CHROMOSOME_I	550711	556641	+	WBGene00004235	ptr-21	cds
F10G7.5	12	0	0	0	0	0.337529	0	0	0.480185	2.34302	0	2.34302	CHROMOSOME_II	4693442	4696405	+	WBGene00017369		cds
ZK792.4	12	0	0	0	0	0.337529	0	0	0.482963	2.34302	0	2.34302	CHROMOSOME_IV	11678417	11681982	-	WBGene00014077		cds
T07F10.4	12	0	0	0	0	0.341141	0	0	0.839835	2.34302	0	2.34302	CHROMOSOME_V	12872037	12882089	+	WBGene00011590	bus-19	cds
Y41C4A.13	12	0	0	0	0	0.341141	0	0	0.839835	2.74087	0	2.74087	CHROMOSOME_III	11733268	11737529	-	WBGene00012759		cds
C33D9.3	12	0.400478	0	0	0	0	0	0	0.480185	2.34302	0	2.34302	CHROMOSOME_IV	8790736	8793281	-	WBGene00007898		cds
F21A10.2	12	0.400478	0	0	0	0	0	0	0.480185	2.34302	0	2.34302	CHROMOSOME_X	10181079	10194317	-	WBGene00008999		cds
T20B5.3	12	0.400478	0	0	0	0	0	0	0.480185	2.34302	0	2.34302	CHROMOSOME_X	9343198	9347371	-	WBGene00020596	oga-1	cds
T25D3.3	12	0.530369	0	0.282331	0.334793	0	0	0	0.480185	3.72475	0	3.72475	CHROMOSOME_II	152203	154918	+	WBGene00020797		cds
C09E8.1	12	0	0.32306	0	0.334793	0	0	0	0.480185	2.34302	0	2.34302	CHROMOSOME_II	556484	564123	+	WBGene00015644		cds
B0222.9	12	0	0.32306	0	0	0	0	0	1.12748	3.19335	0	3.19335	CHROMOSOME_V	9168369	9173001	-	WBGene00015057	gad-3	cds
B0303.7	12	0	0	0	0	0	0	0	0.839835	2.34302	0	2.34302	CHROMOSOME_III	8693557	8699374	+	WBGene00015128		cds
Y43F8C.3	12	0	0	0	0	0	0	0	0.839835	2.34302	0	2.34302	CHROMOSOME_V	19614528	19622436	-	WBGene00012825		cds
Y22F5A.4	12	0	0	0	0	0	0	0	0.839835	2.34302	0	2.34302	CHROMOSOME_V	10277802	10279102	+	WBGene00003090	lys-1	cds
F32A5.4	12	0	0	0	0	0	0	0	1.12748	3.19335	0	3.19335	CHROMOSOME_II	7228743	7230574	+	WBGene00017970		cds
K11D12.5	12	0	0	0	0	0	0	0	0.480185	1.38465	0	1.38465	CHROMOSOME_V	5029309	5030796	-	WBGene00019645	swt-7	cds
T08H10.1	12	0	0	0	0	0	0	0	0.480185	1.38465	0	1.38465	CHROMOSOME_V	4483454	4486517	+	WBGene00020369		cds
T01B6.3	12	0	0	0	0	0	0	0	0.480185	1.38465	0	1.38465	CHROMOSOME_X	2314910	2319325	-	WBGene00020135	aakg-4	cds
C48E7.1	12	0	0	0	0	0	0	0	0.839835	2.74087	0	2.74087	CHROMOSOME_I	6260251	6264527	+	WBGene00016749		cds
C55A1.6	12	0	0	0	0	0	0	0	0.839835	2.55562	0	2.55562	CHROMOSOME_V	15648050	15648785	+	WBGene00008323		cds
Y60A3A.21	12	0	0	0	0	0	0	0	0.839835	2.55562	0	2.55562	CHROMOSOME_V	20011928	20015046	+	WBGene00013366		cds
T22B2.3	12	0	0	0	0	0	0	0	0.839835	2.55562	0	2.55562	CHROMOSOME_X	3917281	3919815	+	WBGene00020667		cds
C10A4.3	12	0	0	0	0	0	0	0	1.3672	3.31511	0	3.31511	CHROMOSOME_X	7407410	7408736	+	WBGene00015664		cds
F17C8.4	12	0	0	0	0	0	0	0	1.3687	3.31511	0	3.31511	CHROMOSOME_III	4737554	4740042	-	WBGene00004311	ras-2	cds
F14D7.10	12	0	0	0	0	0	0	0	1.12748	2.55562	0	2.55562	CHROMOSOME_V	14308470	14308826	+	WBGene00008797		cds
F14D7.7	12	0	0	0	0	0	0	0	1.12748	2.55562	0	2.55562	CHROMOSOME_V	14306489	14306856	-	WBGene00008794		cds
F22E10.5	12	0	0	0	0	0	0	0	1.3672	3.18608	0	3.18608	CHROMOSOME_X	12762015	12765852	+	WBGene00009057	cept-1	cds
C53B7.2	12	0	0	0	0	0	0	0	1.12748	2.34302	0	2.34302	CHROMOSOME_X	6846193	6847507	+	WBGene00016893		cds
Y57A10A.26	12	0	0	0	0	0	0	0	1.12748	2.34302	0	2.34302	CHROMOSOME_II	12264101	12266040	+	WBGene00013266		cds
Y54E10A.16	12	0	0	0	0	0	0	0	1.12748	2.34302	0	2.34302	CHROMOSOME_I	3244152	3246166	-	WBGene00021834	mab-31	cds
F27D9.1	12	0	0	0	0	0	0	0	1.12748	2.34302	0	2.34302	CHROMOSOME_X	7682367	7685632	+	WBGene00006757	unc-18	cds
ZK682.2	12	0	0	0	0	0	0	0	1.13103	2.34302	0	2.34302	CHROMOSOME_V	9263776	9266476	-	WBGene00022788		cds
Y37E3.16	12	0	0	0	0	0	0	0	1.5727	3.42739	0	3.42739	CHROMOSOME_I	2113651	2118553	-	WBGene00021354		cds
R06B9.4	12	0	0	0.282331	0	0	0	0	0.839835	2.34302	0	2.34302	CHROMOSOME_II	13752251	13756188	+	WBGene00011055	arrd-14	cds
T06C10.4	12	0.530369	0	0	0	0.610872	0	0.507836	2.18723	4.35873	0	4.35873	CHROMOSOME_IV	7868893	7870063	+	WBGene00001453	flp-10	cds
F58G6.1	12	0	0	0	0.521899	0	0.445376	0	1.5727	3.19335	0	3.19335	CHROMOSOME_IV	9644228	9647856	-	WBGene00010272	amph-1	cds
Y23H5B.9	12	0	0	0	0	0	0.445376	0	1.13103	2.34302	0	2.34302	CHROMOSOME_I	2551377	2551592	-	WBGene00021280	nspd-8	cds
F33E2.2	12	0	0.493092	0	0	0	0	0	0.839835	2.34302	0	2.34302	CHROMOSOME_I	12565789	12572791	-	WBGene00001008	dlk-1	cds
T11B7.4	12	0	0	0.282331	0.521899	0	0	0	0.839835	2.55562	0	2.55562	CHROMOSOME_IV	8852485	8862474	+	WBGene00001132	alp-1	cds
F58G6.5	12	0	0	0	0	0	0.445376	0.507836	0.480185	2.55562	0	2.55562	CHROMOSOME_IV	9664345	9675655	-	WBGene00003627	nhr-34	cds
K03E5.2	12	0	0	0	0.334793	0	0	0.507836	0.480185	2.34302	0	2.34302	CHROMOSOME_I	3419602	3424213	+	WBGene00019361		cds
T05A1.5	12	0	0	0	0	0	0	0.581573	0.480185	2.34302	0	2.34302	CHROMOSOME_IV	9546311	9560411	+	WBGene00011456		cds
ZK688.2	12	0	0	0	0	0.341141	0	0.507836	0.480185	2.55562	0	2.55562	CHROMOSOME_III	7900968	7904408	+	WBGene00022797		cds
B0024.12	12	0	0.32306	0.51835	0	0.341141	0.661099	0	0.844163	2.34302	0	2.34302	CHROMOSOME_V	10319510	10320133	-	WBGene00001646	gna-1	cds
F32B5.6	12	0	0	0	0	0	0.785205	0	0.839835	2.55562	0	2.55562	CHROMOSOME_I	2668162	2672431	+	WBGene00017979		cds
T19C3.4	12	0	0	0	0	0	0.661099	0	0.839835	2.74087	0	2.74087	CHROMOSOME_III	618245	620209	-	WBGene00020562		cds
F40F9.5	12	0	0	0	0	0.341141	0.445376	0	0.480185	2.34302	0	2.34302	CHROMOSOME_V	9719745	9724093	-	WBGene00009582		cds
Y44A6D.3	12	0	0	0	0	0.337529	0.445376	0	0.480185	2.34302	0	2.34302	CHROMOSOME_V	20790743	20792386	-	WBGene00012854		cds
B0205.14	12	0	0	0	0	0	0	0	0	3.19335	0	3.19335	CHROMOSOME_I	10726907	10727340	+	WBGene00044646		cds
C01G10.17	12	0	0	0	0	0	0	0	0	2.34302	0	2.34302	CHROMOSOME_V	15090740	15091102	+	WBGene00044658		cds
C02C6.1	12	0	0	0	0	0	0	0	0	2.34302	0	2.34302	CHROMOSOME_X	15568848	15573625	+	WBGene00001130	dyn-1	cds
C04G2.7	12	0	0	0	0	0	0	0	0	2.55562	0	2.55562	CHROMOSOME_IV	10107014	10110391	-	WBGene00001204	egl-38	cds
F26D11.4	12	0	0	0	0	0	0	0	0	2.34302	0	2.34302	CHROMOSOME_V	7947211	7948595	-	WBGene00017821		cds
F33C8.1	12	0	0	0	0	0	0	0	0	2.55562	0	2.55562	CHROMOSOME_X	14710405	14718713	+	WBGene00006432	tag-53	cds
F37B1.5	12	0	0	0	0	0	0	0	0	2.55562	0	2.55562	CHROMOSOME_II	13622895	13624363	-	WBGene00001764	gst-16	cds
F38B7.3	12	0	0	0	0	0	0	0	0	2.55562	0	2.55562	CHROMOSOME_V	11549283	11551542	+	WBGene00009534		cds
C06B3.6	12	0	0	0	0	0	0	0	0	2.55562	0	2.55562	CHROMOSOME_V	13908114	13909499	-	WBGene00007365		cds
F08C6.6	12	0	0	0	0	0	0	0	0	2.34302	0	2.34302	CHROMOSOME_X	7568087	7569675	-	WBGene00017244	apy-1	cds
T13G4.7	12	0	0	0	0	0	0	0	0	2.55562	0	2.55562	CHROMOSOME_X	1202376	1203758	-	WBGene00020494		cds
F56B6.4	12	0	0	0	0	0	0	0	0	1.38465	0	1.38465	CHROMOSOME_X	3537626	3540927	+	WBGene00006863	gyg-1	cds
F14B8.2	12	0	0	0	0	0	0	0	0	2.55562	0	2.55562	CHROMOSOME_X	6904696	6905798	+	WBGene00017445		cds
C44C10.9	12	0	0	0	0	0	0	0	0	2.55562	0	2.55562	CHROMOSOME_X	11713174	11716446	-	WBGene00008089		cds
T25G12.5	12	0	0	0	0	0	0	0	0	2.55562	0	2.55562	CHROMOSOME_X	17214944	17217033	-	WBGene00020812	acdh-7	cds
Y73B6BR.1	12	0	0	0	0	0	0	0	0	1.38465	0	1.38465	CHROMOSOME_IV	6506715	6511029	+	WBGene00004169	pqn-89	cds
ZK1055.6	12	0	0	0	0	0	0	0	0	2.55562	0	2.55562	CHROMOSOME_V	6599173	6602589	-	WBGene00022847		cds
ZK863.1	12	0	0	0	0	0	0	0	0	2.34302	0	2.34302	CHROMOSOME_V	12168203	12170189	-	WBGene00014122		cds
C05G5.3	12	0	0	0	0	0	0	0	0	2.34302	0	2.34302	CHROMOSOME_X	14750788	14751942	-	WBGene00007349		cds
D1054.5	12	0	0	0	0	0	0	0	0	1.38465	0	1.38465	CHROMOSOME_V	10772790	10776558	-	WBGene00008372		cds
F40F9.2	12	0	0	0	0	0	0	0	0	3.31511	0	3.31511	CHROMOSOME_V	9707525	9709789	-	WBGene00006470	tag-120	cds
H14N18.3	12	0	0	0	0	0	0	0	0	4.11225	0	4.11225	CHROMOSOME_V	8923066	8923888	+	WBGene00019203	ttr-47	cds
F58H12.1	12	0	0	0	0	0	0	0	0	2.55562	0	2.55562	CHROMOSOME_X	2843996	2852471	-	WBGene00002210	kin-29	cds
ZK105.5	12	0	0	0	0	0	0	0	0	2.34302	0	2.34302	CHROMOSOME_V	7712195	7717300	-	WBGene00022656		cds
C08F8.8	12	0	0	0	0	0	0	0	0	2.34302	0	2.34302	CHROMOSOME_IV	11169813	11174764	+	WBGene00003657	nhr-67	cds
C29E6.2	12	0	0	0	0	0	0	0	0	2.34302	0	2.34302	CHROMOSOME_IV	11864524	11875715	+	WBGene00007801	trpa-1	cds
Y73B6BL.44	12	0	0	0	0	0	0	0	0	2.34302	0	2.34302	CHROMOSOME_IV	6493588	6497349	+	WBGene00044350		cds
F41E7.5	12	0	0	0	0	0	0	0	0	3.19335	0	3.19335	CHROMOSOME_X	10304447	10304888	+	WBGene00009621	fipr-21	cds
F16G10.6	12	0	0	0	0	0	0	0	0	2.34302	0	2.34302	CHROMOSOME_II	2377204	2377856	-	WBGene00017521		cds
Y70C5C.6	12	0	0	0	0	0	0	0	0	2.34302	0	2.34302	CHROMOSOME_V	16722039	16723822	-	WBGene00003702	nhr-112	cds
D1053.1	12	0	0	0	0	0	0	0	0	3.19335	0	3.19335	CHROMOSOME_X	11726203	11727830	-	WBGene00001790	gst-42	cds
Y54G2A.9	12	0	0	0	0	0	0	0	0	2.34302	0	2.34302	CHROMOSOME_IV	2825152	2828063	+	WBGene00021874	clec-81	cds
F49H6.1	12	0	0	0	0	0	0	0	0	2.34302	0	2.34302	CHROMOSOME_V	17010038	17011825	+	WBGene00009905	clec-240	cds
F10D7.2	12	0	0	0	0	0	0	0	0	2.34302	0	2.34302	CHROMOSOME_X	17364572	17368570	-	WBGene00017339		cds
Y47D3B.5	12	0	0	0	0	0	0	0	0	2.34302	0	2.34302	CHROMOSOME_III	11410612	11424563	+	WBGene00006683	twk-31	cds
C02H7.1	12	0	0	0	0	0	0	0	0	2.34302	0	2.34302	CHROMOSOME_X	763768	766732	+	WBGene00001127	dyf-11	cds
Y46C8AL.9	12	0	0	0	0	0	0	0	0	2.34302	0	2.34302	CHROMOSOME_IV	3960728	3964651	+	WBGene00021586	clec-75	cds
F19H6.1	12	0	0	0	0	0	0	0	0	2.34302	0	2.34302	CHROMOSOME_X	12389526	12391406	-	WBGene00008956	nekl-3	cds
C49F8.1	12	0	0	0	0	0	0	0	0	2.34302	0	2.34302	CHROMOSOME_X	13361132	13365225	-	WBGene00008213		cds
F26G1.5	12	0	0	0	0	0	0	0	0	2.34302	0	2.34302	CHROMOSOME_II	4770534	4771377	-	WBGene00017841		cds
C55B6.1	12	0	0	0	0	0	0	0	0	2.34302	0	2.34302	CHROMOSOME_X	7200327	7203973	+	WBGene00016939		cds
C46F4.1	12	0	0	0	0	0	0	0	0	2.34302	0	2.34302	CHROMOSOME_X	5931087	5934649	+	WBGene00001175	egl-6	cds
F19G12.9	12	0	0	0	0	0	0	0	0	2.34302	0	2.34302	CHROMOSOME_X	1419615	1420176	+	WBGene00195185		cds
F26D11.6	12	0	0	0	0	0	0	0	0	2.34302	0	2.34302	CHROMOSOME_V	7955393	7956334	-	WBGene00017823		cds
F33D4.3	12	0	0	0	0	0	0	0	0	2.34302	0	2.34302	CHROMOSOME_IV	7696923	7698357	-	WBGene00001456	flp-13	cds
F36A4.14	12	0	0	0	0	0	0	0	0	2.34302	0	2.34302	CHROMOSOME_IV	4274336	4277704	-	WBGene00003668	nhr-78	cds
F57B1.5	12	0	0	0	0	0	0	0	0	2.34302	0	2.34302	CHROMOSOME_V	13207749	13208772	+	WBGene00010188		cds
F26G1.4	12	0	0	0	0	0	0	0	0	2.34302	0	2.34302	CHROMOSOME_II	4764156	4770009	-	WBGene00017840	ttm-2	cds
W09H1.1	12	0	0	0	0	0	0	0	0	2.34302	0	2.34302	CHROMOSOME_II	13175787	13181491	-	WBGene00012372		cds
F36F2.2	12	0	0	0	0	0	0	0	0	2.34302	0	2.34302	CHROMOSOME_I	9016790	9017987	+	WBGene00009476		cds
F53C11.9	12	0	0	0	0	0	0	0	0	2.34302	0	2.34302	CHROMOSOME_V	13778001	13778578	+	WBGene00044921		cds
W06B11.3	12	0	0	0	0	0	0	0	0	2.34302	0	2.34302	CHROMOSOME_X	5838004	5839722	-	WBGene00021060	dct-11	cds
F31F6.7	12	0	0	0	0	0	0	0	0	2.34302	0	2.34302	CHROMOSOME_X	14898436	14900703	+	WBGene00009303	lips-8	cds
F33C8.3	12	0	0	0	0	0	0	0	0	2.34302	0	2.34302	CHROMOSOME_X	14726556	14729412	-	WBGene00006634	tsp-8	cds
F27D9.7	12	0	0	0	0	0	0	0	0	2.34302	0	2.34302	CHROMOSOME_X	7665711	7670663	-	WBGene00017865		cds
C29F9.7	12	0	0	0	0	0	0	0	0	2.34302	0	2.34302	CHROMOSOME_III	89450	94808	-	WBGene00003931	pat-4	cds
F25E2.2	12	0	0	0	0	0	0	0	0	2.34302	0	2.34302	CHROMOSOME_X	806994	810781	-	WBGene00017780		cds
F42G10.2	12	0	0	0	0	0	0	0	0	2.34302	0	2.34302	CHROMOSOME_X	10027798	10030071	+	WBGene00003368	mkk-4	cds
T23C6.3	12	0	0	0	0	0	0	0	0	2.34302	0	2.34302	CHROMOSOME_X	17135936	17138038	-	WBGene00020725	cnp-3	cds
T22E5.5	12	0	0	0	0	0	0	0	0	2.34302	0	2.34302	CHROMOSOME_X	6408427	6410322	-	WBGene00003495	mup-2	cds
C40H5.5	12	0	0	0	0	0	0	0	0	2.34302	0	2.34302	CHROMOSOME_X	11764389	11769311	-	WBGene00006654	ttx-3	cds
F22H10.6	12	0	0	0	0	0	0	0	0	2.34302	0	2.34302	CHROMOSOME_X	16689305	16690983	-	WBGene00017730		cds
T19H12.8	12	0	0	0	0	0	0	0	0	2.34302	0	2.34302	CHROMOSOME_V	4882164	4884682	-	WBGene00020591	nhr-220	cds
T14B1.2	12	0	0	0	0	0	0	0	0	2.34302	0	2.34302	CHROMOSOME_X	9650942	9653059	-	WBGene00000085	aex-2	cds
T13B5.6	12	0	0	0	0	0	0	0	0	2.34302	0	2.34302	CHROMOSOME_II	1112196	1114233	-	WBGene00020473	lips-12	cds
B0454.5	12	0	0	0	0	0	0	0	0	2.34302	0	2.34302	CHROMOSOME_II	3038862	3040825	+	WBGene00015196		cds
T10C6.3	12	0	0	0	0	0	0	0	0	2.34302	0	2.34302	CHROMOSOME_V	16017951	16019842	+	WBGene00005934	srx-43	cds
T10B10.7	12	0	0	0	0	0	0	0	0	2.34302	0	2.34302	CHROMOSOME_X	15168652	15173551	+	WBGene00003840	ocr-3	cds
C46H11.10	12	0	0	0	0	0	0	0	0	2.34302	0	2.34302	CHROMOSOME_I	5052532	5054886	-	WBGene00016734		cds
T07E3.6	12	0	0	0	0	0	0	0	0	2.34302	0	2.34302	CHROMOSOME_III	6909169	6912427	-	WBGene00020317	pdf-1	cds
C46E10.4	12	0	0	0	0	0	0	0	0	2.34302	0	2.34302	CHROMOSOME_II	3717141	3719770	+	WBGene00016710	fbxc-52	cds
C43H6.1	12	0	0	0	0	0	0	0	0	2.34302	0	2.34302	CHROMOSOME_X	2409683	2412959	+	WBGene00016614		cds
C04A11.4	12	0	0	0	0	0	0	0	0	2.34302	0	2.34302	CHROMOSOME_X	13687903	13695721	+	WBGene00000074	adm-2	cds
D1009.2	12	0	0	0	0	0	0	0	0	2.34302	0	2.34302	CHROMOSOME_X	8911240	8914199	+	WBGene00000884	cyn-8	cds
F43C9.4	12	0	0	0	0	0	0	0	0	2.34302	0	2.34302	CHROMOSOME_X	4796059	4800098	-	WBGene00003245	mig-13	cds
T03D3.4	12	0	0	0	0	0	0	0	0	2.34302	0	2.34302	CHROMOSOME_V	2819579	2821666	-	WBGene00005259	srh-36	cds
C46C2.6	12	0	0	0	0	0	0	0	0	2.34302	0	2.34302	CHROMOSOME_IV	9212405	9214403	+	WBGene00008114		cds
C32D5.2	12	0	0	0	0	0	0	0	0	2.34302	0	2.34302	CHROMOSOME_II	6324452	6327324	+	WBGene00004860	sma-6	cds
F35C8.4	12	0	0	0	0	0	0	0	0	2.34302	0	2.34302	CHROMOSOME_X	5349064	5352361	+	WBGene00006371	syx-3	cds
C34E7.3	12	0	0	0	0	0	0	0	0	2.34302	0	2.34302	CHROMOSOME_X	12930266	12931955	+	WBGene00007933		cds
R10D12.1	12	0	0	0	0	0	0	0	0	2.34302	0	2.34302	CHROMOSOME_V	13932567	13934631	-	WBGene00011185		cds
R106.2	12	0	0	0	0	0	0	0	0	2.34302	0	2.34302	CHROMOSOME_X	17483265	17486756	-	WBGene00020086		cds
R07H5.10	12	0	0	0	0	0	0	0	0	2.34302	0	2.34302	CHROMOSOME_IV	11213424	11218115	-	WBGene00011130	zip-6	cds
R07C3.2	12	0	0	0	0	0	0	0	0	2.34302	0	2.34302	CHROMOSOME_II	941021	943169	+	WBGene00019918	fbxc-36	cds
F16B12.4	12	0	0	0	0	0	0	0	0	2.34302	0	2.34302	CHROMOSOME_X	14095674	14098595	-	WBGene00008880		cds
F14F7.2	12	0	0	0	0	0	0	0	0	2.34302	0	2.34302	CHROMOSOME_III	13020908	13023848	+	WBGene00008809	cyp-13A11	cds
M02A10.2	12	0	0	0	0	0	0	0	0	2.34302	0	2.34302	CHROMOSOME_X	702973	710006	-	WBGene00002150	irk-2	cds
C50F7.6	12	0	0	0	0	0	0	0	0	2.34302	0	2.34302	CHROMOSOME_IV	7720555	7723188	-	WBGene00016846		cds
K09C4.9	12	0	0	0	0	0	0	0	0	2.34302	0	2.34302	CHROMOSOME_X	3271341	3271761	-	WBGene00019553		cds
F20C5.6	12	0	0	0	0	0	0	0	0	2.34302	0	2.34302	CHROMOSOME_IV	8771698	8773182	-	WBGene00008971		cds
K04A8.6	12	0	0	0	0	0	0	0	0	2.34302	0	2.34302	CHROMOSOME_V	6533598	6538045	-	WBGene00001089	dre-1	cds
K02E10.1	12	0	0	0	0	0	0	0	0	2.34302	0	2.34302	CHROMOSOME_X	2496263	2500993	+	WBGene00019317		cds
C16H3.3	12	0	0	0	0	0	0	0	0	2.34302	0	2.34302	CHROMOSOME_X	17601533	17609972	-	WBGene00015868		cds
C54E10.5	12	0	0	0	0	0	0	0	0	2.34302	0	2.34302	CHROMOSOME_V	18796042	18800793	-	WBGene00008309	nhr-170	cds
K02D10.4	12	0	0.32306	0	0	0	0	0	0	2.34302	0	2.34302	CHROMOSOME_III	8777827	8779933	-	WBGene00019304		cds
H04M03.4	12	0	0	0	0	0.341141	0	0	0	2.34302	0	2.34302	CHROMOSOME_IV	5885823	5889793	+	WBGene00019154	glf-1	cds
T12A7.1	12	0	0	0	0	0.341141	0	0	0	2.55562	0	2.55562	CHROMOSOME_IV	11745617	11748662	+	WBGene00001577	gem-4	cds
T02C12.1	12	0	0	0	0	0.341141	0	0	0	3.19335	0	3.19335	CHROMOSOME_III	4029088	4036816	-	WBGene00002038	hum-5	cds
ZK856.7	12	0	0	0	0	0.337529	0	0	0	3.31511	0	3.31511	CHROMOSOME_V	10201830	10202573	+	WBGene00014108		cds
T15B12.1	12	0	0	0	0	0.337529	0	0	0	1.38465	0	1.38465	CHROMOSOME_III	5288141	5298313	+	WBGene00020530		cds
B0280.8	12	0	0	0	0.334793	0	0	0	0	2.55562	0	2.55562	CHROMOSOME_III	7112238	7115378	-	WBGene00003609	nhr-10	cds
F39G3.8	12	0	0	0	0.521899	0	0	0	0	2.90502	0	2.90502	CHROMOSOME_V	4726705	4730155	-	WBGene00006570	tig-2	cds
F47B10.1	12	0	0	0	0.334793	0	0	0	0	1.77257	0	1.77257	CHROMOSOME_X	10897607	10900051	-	WBGene00009812	suca-1	cds
R07H5.4	12	0	0	0	0.521899	0	0	0	0	2.34302	0	2.34302	CHROMOSOME_IV	11186991	11188248	+	WBGene00011124	sdz-27	cds
Y44E3A.1	12	0	0	0	0.521899	0	0	0	0	2.34302	0	2.34302	CHROMOSOME_I	3338369	3340046	+	WBGene00021547		cds
F09F7.6	12	0	0.32306	0.282331	0.334793	0	0	0	0	2.34302	0	2.34302	CHROMOSOME_III	5551181	5552075	-	WBGene00017303		cds
K07C11.5	12	0	0	0	0	0	0	0.507836	0	2.55562	0	2.55562	CHROMOSOME_V	8201788	8202541	+	WBGene00019478	cri-2	cds
C35C5.3	12	0	0	0	0	0	0.445376	0	0	2.74087	0	2.74087	CHROMOSOME_X	11545050	11546431	-	WBGene00007955		cds
C54D1.6	12	0	0	0	0	0	0.445376	0	0	2.34302	0	2.34302	CHROMOSOME_X	7165960	7170582	-	WBGene00000238	bar-1	cds
F28B4.2	12	0	0	0	0	0	0.445376	0	0	2.34302	0	2.34302	CHROMOSOME_X	3210463	3220357	-	WBGene00017891	rgl-1	cds
R08D7.7	12	0	0	0	0	0	0.445376	0	0	2.34302	0	2.34302	CHROMOSOME_III	8992148	8994750	+	WBGene00011147		cds
K12B6.1	12	0	0	0	0	0	0.661099	0	0	2.34302	0	2.34302	CHROMOSOME_V	6303754	6308315	+	WBGene00019666	sago-1	cds
T05D4.1	12	0	0	0	0	0	0.785205	0	0	2.55562	0	2.55562	CHROMOSOME_III	13563240	13564889	-	WBGene00011474	aldo-1	cds
T13B5.5	12	0	0	0	0	0.341141	0.445376	0	0	2.34302	0	2.34302	CHROMOSOME_II	1108848	1110999	-	WBGene00020472	lips-11	cds
Y105E8A.12	12	0	0	0.55096	0	0	0	0	0	2.34302	0	2.34302	CHROMOSOME_I	14436895	14451866	-	WBGene00013672	catp-1	cds
C05D10.3	12	0.400478	0	0	0	0	0	0	0	2.34302	0	2.34302	CHROMOSOME_III	6084622	6087404	-	WBGene00015479	wht-1	cds
C34G6.6	12	0.400478	0	0	0	0	0	0	0	2.34302	0	2.34302	CHROMOSOME_I	5874436	5878957	-	WBGene00016422	noah-1	cds
F35H12.4	12	0.400478	0	0	0	0	0	0	0	2.34302	0	2.34302	CHROMOSOME_X	920193	924514	-	WBGene00018076		cds
K02G10.8	12	0.400478	0	0	0	0	0	0	0	3.19335	0	3.19335	CHROMOSOME_X	4709838	4711715	-	WBGene00001032	dnj-14	cds
F25D1.4	12	0.530369	0	0	0	0	0	0	0	2.34302	0	2.34302	CHROMOSOME_V	10540357	10545718	+	WBGene00009109		cds
R05H11.1	12	0.530369	0	0	0	0	0	0	0	2.34302	0	2.34302	CHROMOSOME_III	6795584	6797684	+	WBGene00019907		cds
ZK1236.2	12	0.530369	0	0	0	0	0	0	0	2.34302	0	2.34302	CHROMOSOME_III	8426266	8428508	+	WBGene00000414	cec-1	cds
T05A8.8	12	0.530369	0.32306	0	0	0	0	0	0	2.34302	0	2.34302	CHROMOSOME_II	2736683	2737561	+	WBGene00044367		cds
F25B3.5	12	0.713599	0	0	0	0	0	0	0	2.34302	0	2.34302	CHROMOSOME_V	9568725	9570269	-	WBGene00009102		cds
T24E12.9	12	0.530369	0	0	0	0	0	0	0	1.38465	0	1.38465	CHROMOSOME_II	3765090	3768471	-	WBGene00020776		cds
K06H7.2	12	0.819049	0	0	0.334793	0	0	0	0	2.34302	0	2.34302	CHROMOSOME_III	8093519	8096241	+	WBGene00019456		cds
LLC1.1	12	0.970732	0.493092	0	0	0	0	0	0.480185	3.42739	0	3.42739	CHROMOSOME_IV	14436337	14444156	-	WBGene00006606	tra-3	cds
C49C3.15	12	0	0.493092	0.282331	0	0	0	0	0	2.34302	0	2.34302	CHROMOSOME_IV	17334156	17335052	+	WBGene00008204		cds
F29C4.1	12	0	0.493092	0.55096	0	0	0	0	0	2.34302	0	2.34302	CHROMOSOME_IV	132416	138076	+	WBGene00000897	daf-1	cds
M18.2	12	0	0.729826	0	0	0	0	0	0	2.34302	0	2.34302	CHROMOSOME_IV	12110565	12111555	-	WBGene00010888	dlc-2	cds
T16A9.4	12	0.530369	0	0	0.334793	0.337529	0	0	0.482963	2.34302	0	2.34302	CHROMOSOME_V	14215362	14220715	-	WBGene00011794		cds
F42G8.4	12	0.530369	0	0.55096	0	0	0	0.581573	0	2.55562	0	2.55562	CHROMOSOME_IV	8139205	8143442	+	WBGene00004057	pmk-3	cds
T01C8.5	12	0.530369	0	0.55096	0	0	0	0	0.480185	2.34302	0	2.34302	CHROMOSOME_X	16791275	16793064	-	WBGene00020146		cds
T28F4.1	12	0.713599	0.586849	1.22014	0	0	0	0	0	3.31511	0	3.31511	CHROMOSOME_I	7472607	7476942	-	WBGene00012136		cds
F54E7.7	12	0.530369	0.729826	0.948691	0.763021	0.337529	0	0.507836	0.839835	2.90502	0	2.90502	CHROMOSOME_III	5682301	5684053	-	WBGene00004321	rcn-1	cds
H05C05.4	12	0.400478	0	0.721132	0.763021	0	0	0	0	2.34302	0	2.34302	CHROMOSOME_III	2944686	2945072	-	WBGene00194747		cds
C41C4.10	12	0	0	0	1.31071	0.337529	0	0.507836	0	2.55562	0	2.55562	CHROMOSOME_II	8102077	8105000	-	WBGene00044049	sfxn-5	cds
F18C12.1	12	0	0	0.282331	0.90434	0.337529	0	0	0	2.34302	0	2.34302	CHROMOSOME_I	8062006	8081666	-	WBGene00000485	che-3	cds
Y37D8A.6	12	0	0	0.55096	1.03195	0.610872	0	0.507836	0.480185	3.42739	0	3.42739	CHROMOSOME_III	12856726	12857812	-	WBGene00012548		cds
F58B3.9	12	0	0	0	0.334793	0.61386	0	0	0	1.38465	0	1.38465	CHROMOSOME_IV	11640122	11640992	-	WBGene00010234	ttr-50	cds
C01F6.6	12	0.530369	0	0	0	0	0	0	1.5727	2.55562	0	2.55562	CHROMOSOME_IV	9119082	9130356	+	WBGene00006438	tag-60	cds
F47B8.2	12	1.14309	0.32306	0	0	0	0.445376	0	2.41796	4.35873	0	4.35873	CHROMOSOME_V	14315845	14316609	-	WBGene00009803		cds
T04B2.5	12	1.22212	0	0	0	0	0.445376	0	2.18723	4.03941	0	4.03941	CHROMOSOME_IV	10056582	10062828	-	WBGene00011423		cds
T05A8.7	12	0.400478	0	0	0	0	0	0	0.839835	2.55562	0	2.55562	CHROMOSOME_II	2740408	2742346	-	WBGene00020233		cds
ZC506.3	12	0.530369	0	0	0	0	0	0	0.839835	2.34302	0	2.34302	CHROMOSOME_X	9965437	9968526	+	WBGene00013920	pssy-1	cds
T20B5.1	12	0.713599	0	0	0	0	0	0	0.839835	2.34302	0	2.34302	CHROMOSOME_X	9336760	9342892	+	WBGene00000161	apa-2	cds
F38E9.5	12	0.713599	0	0	0	0	0	0	0.480185	1.38465	0	1.38465	CHROMOSOME_X	16446125	16451264	+	WBGene00018187		cds
K02F3.4	12	0.530369	0	0	0	0	0.445376	0	0.480185	1.38465	0	1.38465	CHROMOSOME_III	833851	835807	+	WBGene00019327	zip-2	cds
C05B5.8	12	0	0	0	0	0	0	0	0.839835	1.38465	0	1.38465	CHROMOSOME_III	10005367	10006694	-	WBGene00007324		cds
F35E12.10	12	0	0	0	0	0	0	0	1.3672	2.34302	0	2.34302	CHROMOSOME_V	13745690	13748774	-	WBGene00009434		cds
ZC504.4	12	0	0	0	0	0	0	0	1.3672	2.34302	0	2.34302	CHROMOSOME_X	10421595	10428590	-	WBGene00003247	mig-15	cds
C26D10.5	12	0	0	0	0	0	0	0	2.52082	3.53156	0	3.53156	CHROMOSOME_II	8346644	8350499	+	WBGene00001159	eff-1	cds
F35H10.4	12	0	0	0	0	0	0	0	2.18723	3.18608	0	3.18608	CHROMOSOME_IV	8303955	8307356	+	WBGene00006914	vha-5	cds
T19B10.2	12	0	0	0	0	0	0	0	1.5727	2.34302	0	2.34302	CHROMOSOME_V	11221282	11222816	+	WBGene00011831		cds
T21E3.3	12	0	0	0.282331	0	0	0	0	1.7537	2.74087	0	2.74087	CHROMOSOME_I	3935272	3953945	-	WBGene00003072	lrp-2	cds
C14F11.5	12	0	0	0	0	0	0	0	1.5727	1.77257	0	1.77257	CHROMOSOME_X	6233113	6235505	-	WBGene00002024	hsp-43	cds
C25F6.1	12	0	0	0	0	0	0	0	1.12748	1.38465	0	1.38465	CHROMOSOME_X	5486464	5488067	+	WBGene00016102		cds
ZC247.1	12	0.400478	0	0	0	0	0	0	3.08806	3.42739	0	3.42739	CHROMOSOME_I	10264301	10279225	-	WBGene00013859		cds
F18C5.10	12	0	0	0	0	0	0	0.507836	1.91347	2.55562	0	2.55562	CHROMOSOME_II	6559227	6561428	-	WBGene00017563		cds
F55G7.5	12	0	0.32306	0	0	0	0	0.507836	3.38968	4.35226	0	4.35226	CHROMOSOME_X	11938119	11938832	-	WBGene00195215		cds
C28A5.3	12	0	0	0	0	0	0	0.507836	1.12925	2.74087	0	2.74087	CHROMOSOME_III	4442053	4444211	+	WBGene00003590	nex-3	cds
T04D1.4	12	0	0	0	0	0	0	0.581573	1.3672	2.34302	0	2.34302	CHROMOSOME_I	4685869	4698576	-	WBGene00007053	chd-7	cds
C06G3.6	12	0.400478	0.586849	0	0.763021	0.337529	0	0	1.3687	3.31511	0	3.31511	CHROMOSOME_IV	7017615	7020191	+	WBGene00015552		cds
Y74C9A.5	12	0.530369	0.32306	0	0.969555	0.610872	0	0	1.57401	2.55562	0	2.55562	CHROMOSOME_I	27595	32482	-	WBGene00022279	sesn-1	cds
F32A5.6	12	0	0.586849	0	0.334793	0	0	0	0.482963	1.38465	0	1.38465	CHROMOSOME_II	7250171	7251969	-	WBGene00004198	prx-13	cds
F39H2.1	12	0	0.859903	0	0	0	0	0	0.480185	1.77257	0	1.77257	CHROMOSOME_I	8658868	8659961	+	WBGene00009562	flp-22	cds
Y38F2AL.4	12	0.713599	1.30647	0.721132	0.60634	0.337529	0.661099	0.507836	1.91244	3.31511	0	3.31511	CHROMOSOME_IV	2315424	2315988	-	WBGene00006912	vha-3	cds
F58D2.5	12	0	0.729826	0	0	0.341141	0	0	0	1.38465	0	1.38465	CHROMOSOME_IV	13189114	13193225	-	WBGene00206469		cds
C04H5.2	12	0	0	0	0	0.610872	0.445376	0.581573	0	2.34302	0	2.34302	CHROMOSOME_II	14535848	14537504	-	WBGene00007313	clec-147	cds
C37C3.8	12	0	0	0	0	0.337529	0.445376	0.581573	0	1.38465	0	1.38465	CHROMOSOME_V	7844325	7847145	-	WBGene00016500	tag-253	cds
F48A11.1	12	0	0.32306	0.55096	0	0.341141	1.06005	1.27195	0.482963	2.34302	0	2.34302	CHROMOSOME_II	203459	211924	+	WBGene00000497	chs-2	cds
F11G11.2	12	0.400478	0	0	0.521899	0	0.661099	0	0.480185	1.38465	0	1.38465	CHROMOSOME_II	4882066	4883356	+	WBGene00001755	gst-7	cds
Y69H2.3	12	0	0	0	0	0	0.785205	0	0.480185	1.38465	0	1.38465	CHROMOSOME_V	18656071	18664090	-	WBGene00013481		cds
T28F4.4	12	0.400478	0.933135	0	0.90434	0	0	0	0	2.34302	0	2.34302	CHROMOSOME_I	7486573	7490170	-	WBGene00012139		cds
Y38F2AR.12	12	1.26552	0.729826	0	0.60634	1.04313	0	0	0	2.34302	0	2.34302	CHROMOSOME_IV	2399487	2412409	-	WBGene00021430		cds
Y46E12BL.3	12	0.819049	0.586849	0	0.334793	0.337529	0	0	0	2.34302	0	2.34302	CHROMOSOME_II	15230286	15232726	+	WBGene00021596	spsb-2	cds
Y38F2AL.3	12	2.41596	2.33489	2.84467	3.08598	2.38684	2.55012	2.32796	2.61935	3.80535	2.79839	1.47739	CHROMOSOME_IV	2307815	2314567	-	WBGene00006920	vha-11	cds
C01B4.7	12	1.05949	0.729826	0.898892	0.334793	0.341141	0	0	0.839835	2.34302	0	2.34302	CHROMOSOME_V	2494234	2499000	+	WBGene00015271		cds
Y19D10A.4	12	1.05949	0.32306	0.898892	0.334793	0.341141	0	0	0.839835	2.34302	0	2.34302	CHROMOSOME_V	2385955	2390721	+	WBGene00021219		cds
K07F5.16	12	1.22212	0.933135	0.721132	0.334793	0	0	0	0.480185	2.34302	0	2.34302	CHROMOSOME_IV	9864159	9864855	+	WBGene00010640		cds
W02A11.5	12	1.05949	0.729826	0.55096	0	0	0	0	0.480185	2.34302	0	2.34302	CHROMOSOME_I	12749880	12752057	+	WBGene00012195	bath-34	cds
Y39A1A.7	12	1.66374	3.12893	3.45369	2.4437	0.337529	0	0	3.2162	5.32479	0	5.32479	CHROMOSOME_III	10617770	10621270	-	WBGene00012646	lron-10	cds
ZK1058.2	12	2.2317	2.44694	2.89381	1.92091	0.337529	0	0	2.05637	3.42739	0	3.42739	CHROMOSOME_III	3908895	3914118	-	WBGene00003930	pat-3	cds
Y47H9C.5	12	1.37836	1.57304	1.26013	0.60634	0.341141	0.445376	0	1.12748	2.55562	0	2.55562	CHROMOSOME_I	11877794	11887272	+	WBGene00001045	dnj-27	cds
Y49E10.20	12	2.0204	2.194	1.79742	1.15019	0	0	0	1.12748	3.42739	0	3.42739	CHROMOSOME_III	12453487	12456751	-	WBGene00013039	scav-3	cds
Y69A2AR.7	12	0.713599	1.04677	1.51614	0.334793	0	0	0	0.839835	2.34302	0	2.34302	CHROMOSOME_IV	2601139	2607550	+	WBGene00022078		cds
C01B4.9	12	0	0.586849	1.24028	0.521899	0	0.445376	0	1.12748	2.55562	0	2.55562	CHROMOSOME_V	2483003	2487784	-	WBGene00015273		cds
Y19D10A.12	12	0	0.586849	1.24028	0.521899	0	0.445376	0	1.3672	2.55562	0	2.55562	CHROMOSOME_V	2375042	2379504	-	WBGene00021227		cds
Y53G8AM.8	12	0.713599	1.41271	1.22014	1.49997	0.843131	0.445376	0.581573	1.12925	2.34302	0	2.34302	CHROMOSOME_III	3267169	3278689	-	WBGene00021808		cds
Y54G2A.11	12	0.400478	1.04677	0.749507	1.20538	0	0	0	1.5727	2.55562	0	2.55562	CHROMOSOME_IV	2765729	2771788	-	WBGene00021876		cds
T23G5.6	12	1.05949	1.46303	1.24028	0.834783	0	0.661099	0.581573	0.482963	2.34302	0	2.34302	CHROMOSOME_III	9240288	9242417	+	WBGene00011964	saeg-2	cds
Y23H5A.8	12	1.66374	1.4951	0.55096	0.763021	0	0.661099	0	0	2.34302	0	2.34302	CHROMOSOME_I	2633009	2634643	+	WBGene00023172		cds
Y80D3A.9	12	1.44577	1.41271	0.55096	0.334793	0	0.445376	0.507836	0	2.34302	0	2.34302	CHROMOSOME_V	18953108	18957277	-	WBGene00013587		cds
Y111B2A.14	12	1.57181	2.0696	0.749507	0.834783	0.610872	1.33585	0.581573	1.3672	2.55562	0	2.55562	CHROMOSOME_III	12626474	12651656	+	WBGene00004161	pqn-80	cds
Y48A6B.10	12	1.26552	1.00283	0.282331	1.03195	0.610872	0	0.581573	1.3672	1.38465	0	1.38465	CHROMOSOME_III	11036885	11045596	+	WBGene00012971		cds
C06E8.3	10	0	0	0	1.09281	1.04313	0.445376	0.507836	0.482963	0.852432	0	1.09281	CHROMOSOME_III	6990116	7002255	+	WBGene00004182	prk-1	cds
T08G3.13	10	0	0	0	1.36105	0.840582	0.445376	0	0.482963	0.852432	0	1.36105	CHROMOSOME_V	16448015	16449324	+	WBGene00011621		cds
C25A1.2	10	0	0	0	0.90434	0.610872	0.445376	0	0.482963	1.38465	0	1.38465	CHROMOSOME_I	10163465	10165125	-	WBGene00001442	fkh-10	cds
K10G6.3	10	0.713599	0.729826	1.75606	2.99465	3.39866	2.71812	0.882707	0.480185	2.34302	0	3.39866	CHROMOSOME_II	3961692	3972141	+	WBGene00004751	sea-2	cds
R03D7.6	10	0.530369	0	0.282331	0.763021	1.04313	0.661099	0	0	0.852432	0	1.04313	CHROMOSOME_II	10950290	10951546	+	WBGene00001753	gst-5	cds
T24B8.7	9	0.970732	0	0.55096	0.334793	1.04091	0.445376	0.581573	0.480185	0.852432	0	1.04091	CHROMOSOME_II	9042715	9053603	-	WBGene00011980		cds
C26H9A.2	18	0.400478	0.493092	1.49953	1.54422	0.845676	0	0	1.3672	0.852432	0	1.54422	CHROMOSOME_IV	12653466	12674858	+	WBGene00007752		cds
D1007.16	18	2.48168	3.04314	4.06071	3.83179	3.02656	2.27391	2.17774	3.28144	3.05238	2.79839	1.88297	CHROMOSOME_I	4603224	4604197	+	WBGene00017011	eaf-1	cds
F42A9.2	18	2.85565	3.0708	3.63043	4.2235	3.69244	1.96101	2.24736	3.1553	2.90502	2.99328	2.26249	CHROMOSOME_IV	8620540	8626131	+	WBGene00003034	lin-49	cds
R10E11.8	18	3.83196	3.52426	3.81901	4.29612	3.43131	2.16177	2.62364	3.49725	3.88617	2.79839	2.13435	CHROMOSOME_III	9781157	9781971	+	WBGene00006910	vha-1	cds
R12B2.5	18	0.400478	0.493092	1.22014	0.60634	0	0	0	1.57531	0	0	1.57531	CHROMOSOME_III	5829634	5833701	-	WBGene00007016	mdt-15	cds
T13C2.6	18	1.33827	1.36057	2.32821	1.88755	0.337529	0.445376	0	2.61683	1.38465	0	2.61683	CHROMOSOME_II	6783382	6788416	+	WBGene00020481		cds
C28C12.10	18	0	2.37896	2.76905	2.0482	1.86483	1.20453	0.939901	2.19148	2.34302	0	2.76905	CHROMOSOME_IV	8503480	8510498	-	WBGene00006450	tag-77	cds
H19N07.3	18	0.400478	2.13314	2.65215	2.44452	2.31132	2.27391	2.01006	2.52689	2.55562	0	2.65215	CHROMOSOME_V	11118703	11119689	-	WBGene00010407		cds
C44B9.5	18	1.14309	2.28944	2.60943	2.91352	2.06422	1.33585	2.32796	2.94993	2.90502	0	2.94993	CHROMOSOME_III	10896289	10901739	+	WBGene00008082	com-1	cds
K04F10.3	18	1.51017	3.12842	2.80735	2.87969	2.38772	2.18657	2.5883	2.79661	2.90502	0	3.12842	CHROMOSOME_I	6358604	6360462	+	WBGene00019396		cds
F41H10.12	18	0	0	0.721132	0.334793	0.341141	0	0	1.1328	0.852432	0	1.1328	CHROMOSOME_IV	5385312	5386072	+	WBGene00018322		cds
ZK792.2	18	0.530369	0	3.37025	3.05572	0.341141	0.445376	0	2.41869	3.19335	0	3.37025	CHROMOSOME_IV	11673793	11675615	+	WBGene00002130	inx-8	cds
R10E4.2	18	0	0	0.898892	0.60634	0.843131	0.785205	0.507836	1.3702	0.852432	0	1.3702	CHROMOSOME_III	4276192	4280192	-	WBGene00006331	sup-26	cds
T05A12.2	18	0.400478	0	1.89719	1.8534	1.86858	0.958253	1.2267	1.57661	1.38465	0	1.89719	CHROMOSOME_IV	6876719	6883431	-	WBGene00006608	tre-2	cds
T23D8.5	1	1.05949	0	0.51835	1.50076	0	0.445376	0	0.480185	0	0	1.50076	CHROMOSOME_I	9988336	9988786	-	WBGene00001941	his-67	cds
Y50D4C.5	2	1.18889	0	1.22014	0.521899	0	0.661099	0.581573	0.839835	0.852432	0	1.22014	CHROMOSOME_V	998447	1003593	-	WBGene00021749		cds
AC3.10	6	0	0	0	0.90434	3.28668	3.52539	3.49204	3.22245	2.5443	0	3.52539	CHROMOSOME_V	10384134	10385688	+	WBGene00004964	spe-10	cds
F10D11.4	6	0	0	0.282331	1.09281	3.53653	3.6568	3.7184	3.49966	2.55562	0	3.7184	CHROMOSOME_I	8441596	8442327	-	WBGene00008650		cds
C18H2.5	6	0	0	0	0.763021	3.32787	3.96195	3.76392	3.73413	2.55562	0	3.96195	CHROMOSOME_III	7689291	7694179	-	WBGene00015992		cds
Y32F6A.4	6	0	0	0	0.521899	1.9703	2.06714	2.08803	2.19318	1.38465	0	2.19318	CHROMOSOME_V	10428704	10433581	-	WBGene00012529		cds
C30B5.5	6	0	0.32306	0	0.763021	3.07466	2.95284	3.22344	3.22079	2.07798	0	3.22344	CHROMOSOME_II	6201544	6208187	-	WBGene00016246	frpr-20	cds
C01G12.3	6	0.400478	0.32306	0	1.58716	4.1481	4.54035	4.79091	4.45948	3.17878	0	4.79091	CHROMOSOME_II	14581390	14582285	-	WBGene00007244		cds
C01G6.2	6	0.400478	0.32306	0	2.01824	4.68427	5.20743	5.30822	5.38703	3.62334	0	5.38703	CHROMOSOME_II	9267276	9268243	+	WBGene00007224		cds
W03C9.1	6	0.530369	0.32306	0.282331	1.45595	4.01302	4.13845	4.6004	4.46089	3.05238	0	4.6004	CHROMOSOME_II	11960925	11962027	-	WBGene00012219		cds
K08F4.5	6	0	0	0.282331	2.29942	5.8864	6.78536	6.81346	6.60921	4.70142	0	6.81346	CHROMOSOME_IV	10134910	10135892	-	WBGene00010679		cds
T05B4.14	6	0	0	0.282331	1.78258	4.25298	4.87227	4.97068	5.15054	3.53156	0	5.15054	CHROMOSOME_V	4108653	4109955	-	WBGene00194894		cds
Y51B9A.3	6	0	0	0	1.66867	3.83569	4.34143	4.32644	4.26738	2.89614	0	4.34143	CHROMOSOME_II	9405480	9407055	-	WBGene00013085		cds
W03B1.5	6	0	0	0	1.58716	3.83729	4.71725	4.91358	4.60944	3.17878	0	4.91358	CHROMOSOME_IV	4348439	4351841	+	WBGene00020974		cds
R10H10.2	6	0	0	0	1.58716	4.05882	4.90747	5.05281	5.39967	3.42122	0	5.39967	CHROMOSOME_IV	10389556	10391924	-	WBGene00004972	spe-26	cds
T21G5.1	6	0	0	0	1.45595	3.63642	4.55706	4.3512	4.63134	3.04437	0	4.63134	CHROMOSOME_I	6874303	6876927	+	WBGene00020659		cds
T08G11.2	6	0.400478	0	0	1.66867	3.91619	4.76806	4.5168	4.40619	3.05238	0	4.76806	CHROMOSOME_I	8919322	8920509	-	WBGene00044684		cds
F35H8.1	6	0	0	0	0.90434	2.82987	3.27696	3.57848	3.0958	2.07798	0	3.57848	CHROMOSOME_II	9552572	9553202	-	WBGene00009446		cds
C01G12.9	6	0	0.493092	0	0.90434	2.66049	3.48766	3.55434	3.33926	2.3299	0	3.55434	CHROMOSOME_II	14578944	14580023	+	WBGene00007249		cds
D2045.5	6	0	0.32306	0	1.20635	3.7562	4.39733	4.40123	4.55969	3.42122	0	4.55969	CHROMOSOME_III	10467963	10469406	-	WBGene00008423		cds
F55D12.6	6	0	0.729826	0.282331	1.70742	4.42344	5.46961	5.82399	5.67089	4.29421	0	5.82399	CHROMOSOME_I	7901946	7903195	+	WBGene00010114		cds
F13E9.5	6	0	0.493092	0	1.45595	4.03777	4.62584	4.48832	4.60753	3.17878	0	4.62584	CHROMOSOME_IV	10882911	10884342	-	WBGene00008754		cds
F36H12.5	6	0.400478	1.1113	0.282331	2.42181	5.66337	6.72657	6.77015	6.90231	4.74541	0	6.90231	CHROMOSOME_IV	5266858	5267595	+	WBGene00018121		cds
F37E3.3	6	0	0.32306	0	1.45595	4.03722	4.79851	5.40012	5.52894	3.8006	0	5.52894	CHROMOSOME_I	6429610	6431587	-	WBGene00018158		cds
Y53C10A.10	6	0	0.493092	0	1.58716	3.66524	4.41753	4.86408	5.31788	3.52582	0	5.31788	CHROMOSOME_I	12020749	12028304	+	WBGene00013138		cds
K07A1.5	6	0	0.493092	0.51835	2.59824	5.26425	5.84548	6.50035	6.51306	4.79289	0	6.51306	CHROMOSOME_I	9590587	9591817	+	WBGene00010612		cds
R105.1	6	0	0.80978	0.51835	2.2473	5.01686	5.91323	6.51451	6.62273	4.51068	0	6.62273	CHROMOSOME_IV	4633689	4637936	+	WBGene00020084		cds
ZK858.8	6	0	0.493092	0	1.66867	3.75383	4.16154	4.57651	4.72049	3.17878	0	4.72049	CHROMOSOME_I	9124686	9126079	+	WBGene00014121		cds
C04F12.6	6	0	0.493092	0.51835	2.01824	5.01375	5.35635	6.0227	5.95522	3.71469	0	6.0227	CHROMOSOME_I	9692651	9693772	-	WBGene00007300		cds
C55C3.6	6	0	0.493092	0.749507	1.50076	3.78274	4.68065	4.97302	4.76393	2.89614	0	4.97302	CHROMOSOME_IV	5683204	5684715	+	WBGene00016956		cds
B0207.9	6	0.400478	0	0	1.58716	3.69279	4.52667	4.64973	4.63119	2.3299	0	4.64973	CHROMOSOME_I	5957462	5958361	-	WBGene00015032		cds
C38C3.3	6	0.400478	0.32306	0	1.78258	3.81044	4.44348	4.54932	4.53499	2.3299	0	4.54932	CHROMOSOME_V	1495673	1497942	+	WBGene00016512		cds
C04G2.2	6	0	0	0	1.78258	3.94057	4.76052	5.07422	5.04942	2.5443	0	5.07422	CHROMOSOME_IV	10090713	10092358	+	WBGene00007305		cds
ZK795.2	6	0	0	0	1.95466	4.31046	5.24479	5.52907	5.72553	3.17878	0	5.72553	CHROMOSOME_IV	12557051	12558935	-	WBGene00014082		cds
C46E10.1	6	0.400478	0.493092	0	1.78258	3.53928	4.12677	4.3301	4.13906	2.73092	0	4.3301	CHROMOSOME_II	3724263	3725852	+	WBGene00016707		cds
T08H10.3	6	0.819049	0.933135	0.51835	2.75543	4.8246	5.77065	5.79848	5.9173	3.70964	0	5.9173	CHROMOSOME_V	4471365	4473588	+	WBGene00020370		cds
Y67A10A.8	6	0	0	0.55096	0.90434	2.59604	3.3409	3.41345	2.87795	2.07798	0	3.41345	CHROMOSOME_IV	14379925	14383654	-	WBGene00013457	paqr-3	cds
AH6.2	6	0	0.32306	0	1.66867	3.47398	3.68023	3.43351	4.10995	2.74087	0	4.10995	CHROMOSOME_II	9517509	9518837	-	WBGene00007080		cds
C47E12.10	6	0	0	0	1.95466	3.83473	4.10851	4.12163	4.35161	2.74087	0	4.35161	CHROMOSOME_IV	9972827	9973963	+	WBGene00008153		cds
F53C3.1	6	0	0	0	1.81843	3.50257	3.75254	3.44343	3.85503	2.3299	0	3.85503	CHROMOSOME_II	3912049	3913373	+	WBGene00018745		cds
T05A7.6	6	0.400478	0.32306	0	2.79227	5.2442	5.44029	5.41027	5.63648	3.52582	0	5.63648	CHROMOSOME_II	4668641	4671787	-	WBGene00020223		cds
F13H8.12	6	0	0	0	1.78258	3.66524	3.67148	3.40679	4.04099	2.5443	0	4.04099	CHROMOSOME_II	6262506	6263293	+	WBGene00017444		cds
M05B5.1	6	0	0	0	1.95466	4.42323	4.68935	4.80637	4.58413	2.89614	0	4.80637	CHROMOSOME_I	7177951	7179428	-	WBGene00010869		cds
W03F11.3	6	0	0.32306	0	2.01824	4.21204	4.43228	4.34411	4.35199	2.73092	0	4.43228	CHROMOSOME_I	2233753	2234908	-	WBGene00021006	dct-9	cds
AH6.3	6	0	0.729826	0.749507	2.9789	5.63138	6.02875	6.23773	6.22325	4.56078	0	6.23773	CHROMOSOME_II	9519037	9520151	+	WBGene00007081		cds
K09F6.3	6	0	0.933135	0.51835	3.0262	5.38823	6.09406	5.83598	6.06864	4.29082	0	6.09406	CHROMOSOME_II	2256311	2261172	+	WBGene00019586		cds
C15A11.2	6	0	0.32306	0.282331	2.55602	4.74277	5.15296	5.09118	4.76293	3.61796	0	5.15296	CHROMOSOME_I	7384395	7388792	+	WBGene00007597		cds
C24H11.1	6	0	0.32306	0.282331	2.44493	4.87948	5.13239	5.0974	4.82633	3.79584	0	5.13239	CHROMOSOME_III	11787648	11789357	+	WBGene00007699		cds
C24H11.2	6	0	0.32306	0.282331	2.32456	4.81291	5.16755	5.09425	4.8061	3.87718	0	5.16755	CHROMOSOME_III	11790436	11792145	-	WBGene00007700		cds
Y65B4A.9	6	0	0.32306	0.282331	2.61871	5.01601	5.15818	5.05494	5.22559	4.10457	0	5.22559	CHROMOSOME_I	663627	666897	-	WBGene00022032		cds
ZC581.2	6	0	0.493092	0	2.63926	4.7564	4.80918	4.91471	4.94256	3.70964	0	4.94256	CHROMOSOME_I	6655712	6658776	+	WBGene00022632		cds
F13G11.2	6	0	0	0.282331	3.0262	5.02617	5.61243	5.78617	5.68347	4.29421	0	5.78617	CHROMOSOME_IV	14633097	14634341	+	WBGene00008772		cds
K06B4.15	6	0	0	0	2.16567	3.88831	4.48483	4.45282	4.23542	3.41502	0	4.48483	CHROMOSOME_V	15670413	15671833	+	WBGene00077450		cds
K07A3.3	6	0	0	0	2.27337	3.93848	4.5523	4.39949	4.32246	3.30843	0	4.5523	CHROMOSOME_I	2599981	2602651	+	WBGene00019461		cds
R02D5.7	6	0	0	0.51835	2.69851	5.27387	5.70357	6.11443	5.75884	4.40806	0	6.11443	CHROMOSOME_V	14480368	14481315	-	WBGene00010980		cds
F09C12.8	6	0.400478	1.04677	0.282331	2.96326	5.45294	6.14734	5.81381	5.80116	4.45878	0	6.14734	CHROMOSOME_II	5112715	5114146	+	WBGene00017279		cds
ZC376.8	6	0.400478	1.1113	0.282331	2.59787	5.81983	6.00516	5.96997	5.92587	4.56078	0	6.00516	CHROMOSOME_V	14180232	14181520	+	WBGene00013879		cds
R07E5.6	6	0	0.586849	0.282331	1.81843	4.56004	4.94787	4.53852	4.88469	3.62334	0	4.94787	CHROMOSOME_III	4398785	4400914	+	WBGene00011114		cds
T05C12.3	6	0	0.493092	0	2.19324	4.87979	5.2029	4.73683	4.86661	3.71469	0	5.2029	CHROMOSOME_II	8172178	8173487	-	WBGene00011467		cds
K08D10.8	6	0	0.729826	0	2.01824	4.57779	4.93148	4.33712	4.43407	3.87718	0	4.93148	CHROMOSOME_IV	4162510	4164474	+	WBGene00019531	scrm-5	cds
Y71G12B.30	6	0	0.493092	0	1.95466	4.23314	3.91205	3.87054	4.00668	3.17878	0	4.23314	CHROMOSOME_I	1818515	1822933	-	WBGene00044347		cds
ZK622.1	6	0	0.493092	0	1.45595	3.63605	3.43004	3.93988	3.73179	2.89614	0	3.93988	CHROMOSOME_II	5293800	5295611	+	WBGene00022780		cds
C54G4.2	6	0	0	0.282331	2.42181	4.31161	4.75638	4.11544	4.45984	3.71973	0	4.75638	CHROMOSOME_I	8006645	8009113	+	WBGene00008312		cds
F36H1.3	6	0	0	0	2.61871	4.54029	4.83161	4.49311	4.84398	3.52582	0	4.84398	CHROMOSOME_IV	11050130	11052409	+	WBGene00009492		cds
F38H4.6	6	0.400478	0	0	2.32456	3.50378	4.11499	3.49832	3.81511	2.89614	0	4.11499	CHROMOSOME_IV	11846982	11847745	-	WBGene00009550		cds
F26E4.12	6	0.400478	0	0	1.36105	2.71386	3.05728	2.55207	2.95294	2.07798	0	3.05728	CHROMOSOME_I	9780340	9781407	+	WBGene00009165		cds
W06F12.3	6	0	0	0	1.36105	3.36658	3.62993	2.87857	3.49897	2.34302	0	3.62993	CHROMOSOME_III	13734970	13736441	+	WBGene00012307		cds
C29E4.14	6	0	0	0	1.98652	4.86478	5.24083	5.30815	4.60976	3.52582	0	5.30815	CHROMOSOME_III	7920019	7921021	+	WBGene00044634		cds
ZK1225.4	6	0	0	0	1.66867	3.8624	4.00668	4.12359	3.44661	2.74087	0	4.12359	CHROMOSOME_I	13214084	13216212	-	WBGene00014238		cds
F25H5.2	6	0	0	0.282331	1.66867	3.83761	4.00668	4.02808	3.69096	2.89614	0	4.02808	CHROMOSOME_I	9179966	9180996	-	WBGene00009125		cds
F39E9.4	6	0	0	0.282331	1.85402	3.63532	3.68747	4.05847	3.44874	2.5443	0	4.05847	CHROMOSOME_II	3282657	3287156	+	WBGene00018196		cds
F58E6.12	6	0	0	0	1.45595	3.07736	3.69613	3.84082	3.28144	2.3299	0	3.84082	CHROMOSOME_V	9739641	9740845	+	WBGene00077696		cds
W01B6.5	6	0	0	0.282331	1.45595	2.93306	3.84232	3.62855	3.02232	2.3299	0	3.84232	CHROMOSOME_IV	10076304	10078628	+	WBGene00012172		cds
C50F7.3	6	0.400478	0.32306	0	2.29942	4.10588	4.67264	4.64113	4.32459	2.74087	0	4.67264	CHROMOSOME_IV	7732317	7734179	+	WBGene00016843		cds
T16H12.6	6	0.400478	0.32306	0	3.25409	5.37073	5.82294	5.69855	5.69563	3.30843	0	5.82294	CHROMOSOME_III	10098381	10101492	-	WBGene00002186	kel-10	cds
Y57G11B.7	6	0	0.32306	0	3.26735	5.31255	5.84093	5.88945	5.80047	3.52005	0	5.88945	CHROMOSOME_IV	14579206	14581010	-	WBGene00013299		cds
D1081.5	6	0	0	0.282331	2.42181	4.33109	4.75294	4.62814	4.40747	2.89614	0	4.75294	CHROMOSOME_I	8481153	8482530	+	WBGene00008383		cds
K03B4.6	6	0	0	0	1.66867	3.1212	3.44038	3.58746	3.28144	2.07798	0	3.58746	CHROMOSOME_V	4675585	4676178	-	WBGene00019356		cds
T06A4.2	6	0	0	0	2.84566	5.11756	5.51106	5.62719	5.10058	3.52582	0	5.62719	CHROMOSOME_I	760849	761845	-	WBGene00020282	mps-3	cds
T13F2.12	6	0	0	0	2.01824	3.32605	3.87061	3.93988	3.81456	2.5443	0	3.93988	CHROMOSOME_IV	9765654	9766330	-	WBGene00011749	ssp-36	cds
F33D11.7	6	0	0.493092	0	2.63926	4.57492	5.01107	4.85541	4.69916	3.41502	0	5.01107	CHROMOSOME_I	5850041	5851831	-	WBGene00018004		cds
Y46G5A.34	6	0	0.32306	0	2.42181	4.05992	4.31641	4.07133	4.00499	2.73092	0	4.31641	CHROMOSOME_II	12781116	12781636	+	WBGene00012919		cds
F32B6.7	6	0	0	0	2.07861	3.12068	3.75943	3.64584	3.33696	2.5443	0	3.75943	CHROMOSOME_IV	9895386	9896126	+	WBGene00006049	ssp-32	cds
D2062.4	6	0	0	0	1.98652	3.63569	3.97975	4.11741	3.49828	2.07798	0	4.11741	CHROMOSOME_II	2623928	2624535	+	WBGene00017056		cds
R12C12.1	6	0	0.32306	0.282331	2.65917	4.29186	4.92537	4.68637	4.35275	2.5443	0	4.92537	CHROMOSOME_II	6050348	6054279	+	WBGene00020022		cds
F37A8.2	6	0	0	0	2.63926	4.62256	4.61295	4.74888	4.07612	3.04437	0	4.74888	CHROMOSOME_III	3929531	3931405	-	WBGene00009502		cds
R05H5.2	6	0	0	0	2.01824	3.47356	3.66267	3.75325	3.22411	2.34302	0	3.75325	CHROMOSOME_II	10188251	10189346	-	WBGene00000389		cds
F54H5.2	6	0	0	0	1.81843	3.24862	3.18981	3.49204	2.95144	2.07798	0	3.49204	CHROMOSOME_II	6627451	6629242	+	WBGene00018839		cds
Y54E2A.7	6	0.400478	0	0	2.32456	4.06019	4.17294	4.50737	3.54651	2.5443	0	4.50737	CHROMOSOME_II	14771887	14772913	-	WBGene00013192		cds
F59B2.15	6	0	0	0	1.81843	3.96278	3.67876	4.00375	3.27984	2.07798	0	4.00375	CHROMOSOME_III	9002042	9002559	-	WBGene00185006		cds
Y39A1A.2	6	0	0	0	1.66867	3.20854	3.12931	3.30906	2.70981	1.77257	0	3.30906	CHROMOSOME_III	10601806	10603450	-	WBGene00012642		cds
Y69A2AR.8	6	0	0	0	2.32412	4.07957	3.63895	4.1682	3.49966	2.07798	0	4.1682	CHROMOSOME_IV	2596332	2596836	+	WBGene00022079		cds
B0432.12	6	0.530369	0	0.282331	1.85402	4.29256	4.45201	5.06359	4.74165	3.18608	0	5.06359	CHROMOSOME_II	296275	297017	-	WBGene00015193	clec-117	cds
T28F4.3	6	0.530369	0	0	1.88815	3.88522	4.17913	4.81785	4.45878	3.05238	0	4.81785	CHROMOSOME_I	7484053	7486036	-	WBGene00012138		cds
C27D6.11	6	0	0	0	2.10839	4.65311	4.72078	5.36056	4.9596	3.52005	0	5.36056	CHROMOSOME_II	5159706	5161120	-	WBGene00044388		cds
ZK856.18	6	0	0	0	1.58716	3.39953	3.46928	4.16616	3.77292	2.5443	0	4.16616	CHROMOSOME_V	10184701	10185963	-	WBGene00194912		cds
Y54G2A.13	6	0	0	0	2.32412	4.63737	4.62284	5.1326	5.04953	3.52582	0	5.1326	CHROMOSOME_IV	2814505	2818562	-	WBGene00021878		cds
Y54E2A.9	6	0.530369	0	0	2.51253	4.8665	4.98129	5.35622	5.24371	3.42122	0	5.35622	CHROMOSOME_II	14785100	14785927	-	WBGene00013194		cds
ZK353.4	6	0.400478	0	0.282331	2.42181	4.68374	4.75224	5.20516	4.80597	3.42122	0	5.20516	CHROMOSOME_III	8388388	8389567	-	WBGene00022700		cds
C28C12.11	6	0.917315	0	0.282331	2.79227	4.8787	5.44713	5.81637	5.55465	4.6092	0	5.81637	CHROMOSOME_IV	8474086	8475267	+	WBGene00016181		cds
F36A4.2	6	0.819049	0	0.282331	2.44493	4.96705	5.40113	5.92408	5.0671	4.61462	0	5.92408	CHROMOSOME_IV	4271208	4271875	+	WBGene00018081		cds
C45G9.4	6	0.530369	0	0	3.38044	5.45231	6.4933	6.23912	6.23981	4.82956	0	6.4933	CHROMOSOME_III	5062669	5063825	+	WBGene00016675		cds
C45G9.9	6	0.819049	0	0	3.25433	5.29549	6.40083	6.2899	6.3768	4.94725	0	6.40083	CHROMOSOME_III	5054568	5055718	-	WBGene00016680		cds
M28.9	6	0.400478	0	0.282331	3.38044	5.51216	6.53348	6.99567	6.90648	4.74294	0	6.99567	CHROMOSOME_II	10639398	10643477	+	WBGene00010900		cds
Y47G6A.3	6	0.530369	0	0	2.49048	4.3123	4.64013	5.22838	5.14814	3.52582	0	5.22838	CHROMOSOME_I	3601294	3602861	+	WBGene00021633		cds
F47G6.4	6	1.51017	0.933135	1.10184	3.331	5.22436	5.89016	6.44101	6.91168	4.98861	0	6.91168	CHROMOSOME_I	1446668	1465342	+	WBGene00004969	spe-15	cds
Y106G6G.1	6	0.530369	0	0.282331	1.95466	3.8624	4.02053	4.13185	4.71931	3.17878	0	4.71931	CHROMOSOME_I	10329018	10330361	+	WBGene00013710		cds
Y53F4B.19	6	0.400478	0	0.282331	2.04874	4.08146	4.60992	4.90652	5.39847	3.52005	0	5.39847	CHROMOSOME_II	15077197	15079399	+	WBGene00013165		cds
Y53G8B.4	6	0.400478	0	0.282331	1.36105	3.60551	3.42138	3.84338	4.3813	2.90502	0	4.3813	CHROMOSOME_III	3112795	3127109	-	WBGene00021820	nipa-1	cds
C03C11.1	6	0.400478	0.493092	0.721132	2.61871	4.57703	5.33202	5.74611	5.88959	3.79584	0	5.88959	CHROMOSOME_I	10014721	10015487	+	WBGene00007274		cds
Y4C6A.4	6	0	0	0.55096	2.01824	3.75214	4.91491	5.1068	5.38629	3.70964	0	5.38629	CHROMOSOME_IV	5453004	5453632	+	WBGene00021154		cds
R09E10.3	6	0	0	0.924006	2.61871	3.91377	5.27205	5.36063	5.7045	3.30173	0	5.7045	CHROMOSOME_IV	10310769	10313648	-	WBGene00011173	acs-18	cds
C09B9.2	6	0.400478	0	0.51835	2.75543	4.4054	5.21751	5.26889	5.63788	3.04437	0	5.63788	CHROMOSOME_IV	5029258	5031035	+	WBGene00015627		cds
C25A8.2	6	0	0.32306	0.282331	3.01079	4.90402	5.48964	5.60532	5.93705	3.71469	0	5.93705	CHROMOSOME_IV	7009830	7010733	+	WBGene00016083		cds
H04M03.1	6	0	0	0.282331	2.69851	4.42366	5.02086	4.97977	5.31837	3.05238	0	5.31837	CHROMOSOME_IV	5896633	5899101	+	WBGene00019151		cds
Y49E10.10	6	0	0	0	2.49048	4.68392	5.02315	5.57261	5.61465	3.30843	0	5.61465	CHROMOSOME_III	12395434	12398882	+	WBGene00013033		cds
C09G9.4	6	0	0	0	2.37401	3.28434	3.78263	3.80804	4.43353	2.5443	0	4.43353	CHROMOSOME_IV	8874134	8876963	+	WBGene00006409	tag-19	cds
C18E9.8	6	0	0	0	2.55602	3.96424	4.7215	4.75686	5.21395	3.41502	0	5.21395	CHROMOSOME_II	8985958	8987998	-	WBGene00007688		cds
C24D10.1	6	0.400478	0	0.282331	2.44493	3.28762	3.79745	4.13797	4.32227	2.73092	0	4.32227	CHROMOSOME_IV	5166332	5168419	+	WBGene00016053		cds
C49C3.1	6	0	0	0.282331	2.86293	3.80848	4.49892	4.93604	4.8456	3.41502	0	4.93604	CHROMOSOME_IV	17312123	17315731	+	WBGene00004908	snf-9	cds
M70.3	6	0	0.32306	0	3.10139	4.9316	5.4291	5.94812	5.90765	3.9627	0	5.94812	CHROMOSOME_IV	2237663	2242417	-	WBGene00019785		cds
T02E1.6	6	0	0	0.282331	2.96326	4.56062	4.86011	5.52127	5.46632	3.61796	0	5.52127	CHROMOSOME_I	8211105	8212405	+	WBGene00011378		cds
D2062.5	6	0	0	0	1.36105	2.15856	2.29686	2.95905	2.62125	1.77257	0	2.95905	CHROMOSOME_II	2622668	2623581	+	WBGene00017057		cds
F27D4.6	6	0	0	0	1.58716	2.88177	2.82454	3.72655	3.93018	2.5443	0	3.93018	CHROMOSOME_I	7731145	7737989	+	WBGene00009190		cds
F37A4.4	6	0	0	0.282331	2.82787	4.17066	4.7066	5.92823	5.97384	3.9627	0	5.97384	CHROMOSOME_III	6713528	6717966	+	WBGene00018134		cds
C14B1.3	6	0.530369	1.1113	0.898892	2.10787	3.16273	3.68894	3.97901	4.17427	3.05238	0	4.17427	CHROMOSOME_III	3703630	3705036	+	WBGene00007574		cds
ZK1098.9	6	0	0.586849	0.51835	1.98652	3.40126	3.44212	4.13797	4.23645	2.89614	0	4.23645	CHROMOSOME_III	9544367	9544994	+	WBGene00014225		cds
F07E5.4	6	0	0	0	1.20635	3.20755	3.03245	4.11952	4.23666	2.3299	0	4.23666	CHROMOSOME_II	2050028	2051684	-	WBGene00017209		cds
T01B11.2	6	0	0	0	1.45595	3.03271	3.26537	3.98582	4.23481	2.07798	0	4.23481	CHROMOSOME_IV	8449336	8451758	-	WBGene00020139		cds
F26D2.10	6	0	0	0	1.66867	2.98143	2.84025	3.40679	3.77547	2.07798	0	3.77547	CHROMOSOME_V	16424822	16429429	-	WBGene00009149		cds
T14D7.3	6	0	0	0	1.66867	3.2491	2.94078	3.88038	4.03887	2.07798	0	4.03887	CHROMOSOME_II	8859011	8859563	-	WBGene00044062	snb-6	cds
T26A5.1	6	0	0.586849	0	1.85402	3.63311	3.82006	4.4479	4.84452	2.5443	0	4.84452	CHROMOSOME_III	6471718	6475199	+	WBGene00007060	wht-6	cds
R09A1.2	6	0	0.32306	0.51835	1.58716	3.28668	2.68664	3.32694	3.68736	2.07798	0	3.68736	CHROMOSOME_V	1018338	1022912	-	WBGene00019972		cds
B0280.11	6	0	0	0	1.70742	4.18987	4.45711	4.44296	4.7615	3.71469	0	4.7615	CHROMOSOME_III	7136448	7138216	-	WBGene00015106		cds
ZK892.5	6	0	0	0	2.22028	4.89111	4.72502	4.88483	5.2287	4.23372	0	5.2287	CHROMOSOME_II	10008172	10009322	+	WBGene00014129		cds
T02B11.9	6	0	0	0.282331	2.01824	4.95469	4.91674	5.54826	5.30215	4.41118	0	5.54826	CHROMOSOME_V	876293	877167	+	WBGene00044777		cds
C15H11.1	6	0	0	0	2.10839	3.66488	4.02053	4.38763	4.43299	4.03133	0	4.43299	CHROMOSOME_V	14393843	14394449	+	WBGene00007613		cds
C30A5.5	6	0	0	0	1.45595	3.03271	3.3915	3.73189	3.77235	3.17878	0	3.77235	CHROMOSOME_III	8203020	8205043	+	WBGene00004899	snb-5	cds
F13E9.16	6	0	0	0	2.10839	4.1499	4.84724	5.40018	5.34311	4.83189	0	5.40018	CHROMOSOME_IV	10887179	10887364	-	WBGene00045209		cds
F21H7.2	6	0	0	0	2.37358	5.11874	5.48799	5.94982	5.92645	5.45541	0	5.94982	CHROMOSOME_V	16227134	16229873	-	WBGene00009028		cds
F27C1.3	6	0	0.32306	0	2.16567	4.31345	5.04647	5.27255	5.15	4.87891	0	5.27255	CHROMOSOME_I	5426360	5427319	+	WBGene00017853		cds
Y59E9AL.5	6	0.530369	0.493092	0	2.42181	5.07415	6.12377	6.46758	6.58685	5.72455	0	6.58685	CHROMOSOME_IV	5221877	5222225	-	WBGene00021995		cds
F36H12.3	6	0.530369	0.493092	0.749507	3.38044	6.6282	7.17927	7.33071	6.85628	6.59128	0	7.33071	CHROMOSOME_IV	5272863	5274148	+	WBGene00018119		cds
T02H6.7	6	0	0	0	1.85402	3.57085	4.11926	4.182	3.89518	3.8006	0	4.182	CHROMOSOME_II	682633	683327	+	WBGene00020177		cds
Y40H4A.2	6	0	0	0	2.2473	3.96717	4.74043	4.71252	4.65369	4.23372	0	4.74043	CHROMOSOME_V	14583291	14585421	-	WBGene00012741		cds
ZK795.4	6	0	0	0.282331	1.85402	3.28902	3.6553	3.99028	3.85396	3.41502	0	3.99028	CHROMOSOME_IV	12560726	12561178	+	WBGene00014084	snb-7	cds
ZK849.6	6	0	0	0.282331	2.37401	4.65493	4.86396	5.1728	5.06478	4.29082	0	5.1728	CHROMOSOME_I	14198600	14199046	-	WBGene00014104		cds
B0379.2	6	0.530369	0	0.282331	2.59824	4.74328	5.94474	6.06183	6.14463	5.09639	0	6.14463	CHROMOSOME_I	10070912	10071819	-	WBGene00007156		cds
D1086.17	6	0.530369	0	0.721132	2.86293	4.69952	6.04015	6.60303	6.8235	5.45843	0	6.8235	CHROMOSOME_V	14067841	14071199	+	WBGene00045355		cds
C08F8.6	6	0	0	0.282331	2.8803	4.90433	5.80673	5.99491	6.16875	4.82956	0	6.16875	CHROMOSOME_IV	11162765	11164267	-	WBGene00007448		cds
Y71G12B.27	6	0	0	0	2.7738	4.95557	5.59981	5.67214	5.99125	4.70651	0	5.99125	CHROMOSOME_I	1797437	1798697	-	WBGene00022162		cds
F54C1.8	6	0	0	0.282331	2.19324	4.23363	4.74461	4.88847	5.08445	3.62871	0	5.08445	CHROMOSOME_I	5004960	5006029	-	WBGene00018792		cds
R10E4.7	6	0	0	0.55096	2.32456	4.21253	4.97894	4.9741	5.28625	3.88168	0	5.28625	CHROMOSOME_III	4295256	4296583	+	WBGene00011203		cds
Y42H9AR.2	6	0	0	0.282331	1.85402	3.43808	4.1139	4.56902	4.35332	3.52582	0	4.56902	CHROMOSOME_IV	8099860	8101410	+	WBGene00021537		cds
ZC412.10	6	0	0	0.55096	2.04874	3.60175	4.05233	4.5168	4.51224	3.52005	0	4.5168	CHROMOSOME_V	14876039	14876804	-	WBGene00050943		cds
C30G7.3	6	0	0	0	2.13706	4.10349	5.42433	5.59352	6.11126	4.3555	0	6.11126	CHROMOSOME_V	14942116	14945651	-	WBGene00044177		cds
F41G3.5	6	0	0	0	1.78258	3.91467	4.68935	4.70841	5.01423	3.71469	0	5.01423	CHROMOSOME_II	6746701	6748583	+	WBGene00018301		cds
F47D12.7	6	0	0	0	1.58716	4.05965	5.03059	5.21586	5.45479	3.95844	0	5.45479	CHROMOSOME_III	6293196	6295798	-	WBGene00018563		cds
F14H8.1	6	0	0.32306	0	1.66867	3.72605	4.43316	4.66667	4.58429	3.71973	0	4.66667	CHROMOSOME_V	15011853	15014205	-	WBGene00008832	obr-2	cds
Y39G10AR.25	6	0	0	0	2.10839	4.08173	5.16236	5.05817	4.86727	4.03133	0	5.16236	CHROMOSOME_I	2352837	2356240	+	WBGene00077563	peel-1	cds
C28A5.6	6	0	0.729826	0.948691	2.55602	4.86462	5.19733	5.6265	6.0511	4.70651	0	6.0511	CHROMOSOME_III	4423686	4429471	-	WBGene00007791		cds
Y67D8B.5	6	0	0.32306	0.55096	2.01824	4.29303	4.93148	4.79223	5.24351	4.23372	0	5.24351	CHROMOSOME_IV	3202355	3203858	+	WBGene00022064		cds
F41F3.1	6	0	0.32306	0	1.25947	3.86428	4.09548	3.87054	4.29587	3.62334	0	4.29587	CHROMOSOME_V	4654541	4655772	+	WBGene00018296		cds
ZK262.4	6	0	0.32306	0	1.09281	3.08061	3.37184	3.45328	3.54751	3.17878	0	3.54751	CHROMOSOME_V	18423855	18424179	-	WBGene00013951		cds
Y66A7A.9	6	0	0.32306	0	1.58716	3.20656	3.42138	3.32328	3.85369	3.42122	0	3.85369	CHROMOSOME_III	11611172	11612371	-	WBGene00194864		cds
E03H12.7	6	0.400478	0.729826	1.22014	2.79227	5.75123	6.28468	6.66995	6.53165	4.91348	0	6.66995	CHROMOSOME_IV	4987749	4988608	-	WBGene00017114		cds
F47B3.4	6	0	0.32306	1.19972	3.18663	5.77778	6.199	6.19779	6.10283	4.70397	0	6.199	CHROMOSOME_I	3960977	3962202	+	WBGene00018528		cds
F47B3.5	6	0	0.32306	1.32947	2.82787	5.66157	6.0787	6.04019	6.06089	4.70397	0	6.0787	CHROMOSOME_I	3963118	3964180	-	WBGene00018529		cds
F36A2.11	6	0	0	0.749507	1.85402	3.96454	4.20765	4.05422	4.07404	3.71973	0	4.20765	CHROMOSOME_I	8822181	8823630	+	WBGene00009458		cds
ZK354.7	6	0.530369	0	0.924006	2.97918	5.57876	6.32916	5.85958	6.31222	5.28704	0	6.32916	CHROMOSOME_IV	5302133	5303092	-	WBGene00022708		cds
B0280.17	6	0.530369	0.586849	0.721132	3.15894	5.14228	5.36134	5.77447	6.10317	5.83162	0	6.10317	CHROMOSOME_III	7134960	7136065	-	WBGene00044674		cds
C14C10.1	6	0.530369	0	0.721132	2.75543	5.24396	5.85967	6.42897	6.75894	6.20774	0	6.75894	CHROMOSOME_V	12588409	12589602	+	WBGene00007584		cds
Y69E1A.1	6	0.819049	0.32306	1.19972	4.47692	6.34397	7.6743	8.33857	8.30382	7.87734	0	8.33857	CHROMOSOME_IV	10947211	10948875	-	WBGene00013473		cds
C50F4.10	6	0	0	0.55096	2.3979	3.75247	3.88584	4.44296	4.78461	3.9627	0	4.78461	CHROMOSOME_V	9529985	9531553	-	WBGene00008235		cds
F49C12.15	6	0.530369	0.32306	1.19972	3.69352	4.9669	5.67177	6.38768	6.93654	5.28534	0	6.93654	CHROMOSOME_IV	9324425	9327515	+	WBGene00009884		cds
D1014.2	6	0	0	0	1.66867	2.15343	2.89891	3.26879	3.68615	3.05238	0	3.68615	CHROMOSOME_V	8143741	8147815	+	WBGene00017015		cds
C14C11.1	6	0.530369	0.729826	0	3.07173	4.47565	5.22	5.41784	5.82945	5.0268	0	5.82945	CHROMOSOME_V	5663584	5665247	+	WBGene00015765		cds
T16A9.5	6	0.970732	1.77202	0.51835	4.19737	6.09823	7.29605	8.03698	7.91412	7.0706	0	8.03698	CHROMOSOME_V	14213576	14215074	-	WBGene00011795		cds
ZC317.6	6	0.530369	1.36057	0	3.22768	4.49305	5.40686	5.36235	5.72487	4.75035	0	5.72487	CHROMOSOME_V	5465806	5468593	-	WBGene00022589		cds
Y51B9A.5	6	0.530369	0.859903	0	2.84566	4.55965	5.26915	5.28822	5.18067	5.34537	0	5.34537	CHROMOSOME_II	9404091	9404686	+	WBGene00013087		cds
F20D12.5	6	0	0.32306	0	1.78258	2.88362	3.90711	4.08407	4.26697	3.61796	0	4.26697	CHROMOSOME_IV	7939800	7940838	-	WBGene00017644	exc-9	cds
F30A10.12	6	0	0.859903	0	1.95466	3.81207	5.15716	5.31911	5.18003	4.3555	0	5.31911	CHROMOSOME_I	9481589	9482270	+	WBGene00009269		cds
C03B8.3	6	0	0.729826	0.282331	2.8803	3.69456	4.06463	4.31211	4.4082	3.42122	0	4.4082	CHROMOSOME_III	7712266	7717247	+	WBGene00015386		cds
C55C3.4	6	0	0.586849	0	3.08677	3.93818	4.32666	4.46261	4.74121	3.42122	0	4.74121	CHROMOSOME_IV	5676201	5678133	-	WBGene00016954		cds
K05F1.3	6	0	0.586849	0	3.72286	5.08432	6.20255	6.51141	6.95658	5.39987	0	6.95658	CHROMOSOME_II	5794487	5796254	+	WBGene00019406	acdh-8	cds
Y45F10B.3	6	0	0.32306	0	2.87999	4.01273	4.71443	4.77662	5.03128	3.71469	0	5.03128	CHROMOSOME_IV	13593627	13593854	+	WBGene00012871		cds
F17C8.7	6	1.14309	0.729826	0	4.19042	5.79314	6.39331	6.68742	6.67369	5.36887	0	6.68742	CHROMOSOME_III	4736035	4737221	+	WBGene00008912		cds
F41G3.4	6	0.530369	0.729826	0	3.13045	4.71582	5.06217	5.16785	5.4131	4.60648	0	5.4131	CHROMOSOME_II	6755100	6755924	+	WBGene00001424	fis-1	cds
R07E5.15	6	0.917315	1.30647	0.282331	4.17668	5.73023	6.26421	6.64762	6.50147	5.57934	0	6.64762	CHROMOSOME_III	4401430	4402477	+	WBGene00011120		cds
C15H7.3	6	0	0	0.282331	3.11612	4.95425	4.86845	5.22263	5.31613	4.46479	0	5.31613	CHROMOSOME_III	9650337	9651875	-	WBGene00007610		cds
F44G3.7	6	0	0	0	2.55602	4.07849	3.97384	4.5401	4.29192	3.42122	0	4.5401	CHROMOSOME_V	16133868	16137100	-	WBGene00009708		cds
F23C8.7	6	0	0.493092	0	2.16567	3.86177	3.72037	3.77699	3.85691	3.42739	0	3.86177	CHROMOSOME_I	2422336	2425075	-	WBGene00017736		cds
F47C12.4	6	0	0.586849	0.282331	3.39217	5.10603	5.0777	5.31726	5.18302	4.56639	0	5.31726	CHROMOSOME_IV	3973343	3975929	+	WBGene00018548	clec-79	cds
C54G4.3	6	0	0	0	2.37401	4.14784	3.54308	4.25884	4.17255	3.80535	0	4.25884	CHROMOSOME_I	8005122	8006291	-	WBGene00008313		cds
Y111B2A.27	6	0	0	0	2.29942	4.25034	4.12352	4.46416	4.51139	4.29758	0	4.51139	CHROMOSOME_III	12530273	12532190	-	WBGene00013744		cds
C17H12.5	6	0	0	0	3.49641	4.66923	4.83619	4.80768	5.01423	4.66392	0	5.01423	CHROMOSOME_IV	6815900	6817621	-	WBGene00015931		cds
F36H12.11	6	0	0	0.282331	3.11586	4.42302	4.82111	4.88847	5.03246	4.87665	0	5.03246	CHROMOSOME_IV	5255904	5256784	-	WBGene00018125	rmd-4	cds
R13H9.1	6	0	0	0	3.54	4.86509	5.41867	5.31549	5.70443	5.19667	0	5.70443	CHROMOSOME_IV	5068860	5069845	+	WBGene00020070	rmd-6	cds
C33F10.1	6	0.400478	0	0.282331	4.14854	6.29048	7.22122	7.23625	7.24001	6.49075	0	7.24001	CHROMOSOME_II	4835024	4835712	+	WBGene00016351		cds
W03C9.8	6	0	0	0.282331	2.82819	4.08443	4.74808	5.08478	4.84465	4.40494	0	5.08478	CHROMOSOME_II	11948681	11949404	+	WBGene00012223		cds
F32B6.4	6	0	0	0.749507	3.68418	5.68651	6.28371	6.39106	6.34129	5.37368	0	6.39106	CHROMOSOME_IV	9890470	9892006	-	WBGene00009321		cds
F36A4.4	6	0.400478	0	0.721132	3.25386	4.96632	5.54299	5.72458	5.5778	4.74788	0	5.72458	CHROMOSOME_IV	4267624	4268228	+	WBGene00018083		cds
Y37E11B.10	6	0	0	0.51835	3.89326	5.91257	6.56216	6.67134	7.12579	5.92476	0	7.12579	CHROMOSOME_IV	3603544	3606461	-	WBGene00021381		cds
C33F10.11	6	0.400478	0.729826	0.721132	3.8762	5.84762	7.05824	7.08173	6.99349	6.01942	0	7.08173	CHROMOSOME_II	4834154	4834829	-	WBGene00016357		cds
F30F8.2	6	0.400478	0.32306	0.749507	2.51253	3.91255	4.22369	4.32107	4.17298	3.42122	0	4.32107	CHROMOSOME_I	7826436	7831624	-	WBGene00009271	glna-3	cds
Y41C4A.18	6	0.819049	0.32306	0.721132	3.55108	5.87427	6.16873	6.54585	6.26895	5.53132	0	6.54585	CHROMOSOME_III	11730607	11731205	+	WBGene00012761		cds
C07A9.13	6	0	0	0.721132	2.44493	3.63532	3.69467	3.60222	3.39485	3.42122	0	3.69467	CHROMOSOME_III	9679614	9681185	-	WBGene00044227		cds
K09E4.1	6	0.713599	0.32306	1.36659	4.06841	6.05651	6.13014	6.28711	6.52637	5.96677	0	6.52637	CHROMOSOME_II	14137755	14139994	+	WBGene00010719		cds
F20H11.4	6	0	0	1.32947	4.16914	5.6758	5.98058	6.19586	6.30641	4.98652	0	6.30641	CHROMOSOME_III	6608351	6610339	+	WBGene00017647		cds
K08C9.2	6	0	0	1.19972	4.58017	6.19989	6.60873	6.6444	6.62928	5.34863	0	6.6444	CHROMOSOME_I	11486886	11488436	-	WBGene00010651		cds
W03F11.4	6	0	0	1.05713	3.85	5.45962	6.00052	6.27151	6.08775	4.87665	0	6.27151	CHROMOSOME_I	2235610	2241359	-	WBGene00021007		cds
ZK418.2	6	0	0	0.721132	3.57185	4.47648	4.9521	5.13253	4.80624	4.24075	0	5.13253	CHROMOSOME_III	7091243	7093353	+	WBGene00022732		cds
C25A8.5	6	0	0.729826	0.924006	3.07199	4.45888	4.59688	4.23242	4.5119	3.71973	0	4.59688	CHROMOSOME_IV	6999588	7001482	+	WBGene00016085		cds
ZK546.4	6	0	0.729826	0.924006	4.25117	6.45468	6.38328	6.37214	6.09639	5.05804	0	6.45468	CHROMOSOME_II	4938050	4938596	+	WBGene00022761		cds
Y106G6G.4	6	0	0.586849	0.948691	4.06068	5.51046	5.74169	5.75074	5.79796	5.25869	0	5.79796	CHROMOSOME_I	10321339	10323245	-	WBGene00013713		cds
F55A11.11	6	0	1.04677	1.07966	3.21356	5.34097	5.32692	5.6023	5.45275	4.56078	0	5.6023	CHROMOSOME_V	11783360	11784544	+	WBGene00010082		cds
C03C10.2	6	0.400478	0	0	1.95466	3.50458	3.01871	2.99997	3.7315	3.05238	0	3.7315	CHROMOSOME_III	4091052	4093254	+	WBGene00007269		cds
K05F1.8	6	0.400478	0	0.282331	1.85402	3.6638	3.3808	3.29816	3.28224	3.18608	0	3.6638	CHROMOSOME_II	5799298	5799638	-	WBGene00019409		cds
C17C3.1	6	0	0.32306	0	1.62813	2.23841	3.14205	3.52044	2.79661	2.5443	0	3.52044	CHROMOSOME_II	5570620	5574926	+	WBGene00015887		cds
T04B2.8	6	0	0	0	1.78258	2.15138	2.95284	3.51724	2.52689	2.07798	0	3.51724	CHROMOSOME_IV	10050560	10051164	-	WBGene00044018		cds
F43E2.6	6	0	0	0	1.20635	2.31775	3.15467	3.53591	2.31033	2.07798	0	3.53591	CHROMOSOME_II	7366548	7368803	-	WBGene00018394		cds
C17H12.3	6	0.819049	0	0	3.21429	5.3041	5.54218	5.56809	5.67081	3.30843	0	5.67081	CHROMOSOME_IV	6793904	6795618	-	WBGene00015929		cds
M88.3	6	1.14309	0.32306	0.282331	3.18688	4.68285	5.11743	4.69874	4.97939	3.30173	0	5.11743	CHROMOSOME_III	4543542	4544969	-	WBGene00010906		cds
ZC404.2	6	0.819049	0.32306	0	1.88815	2.93425	3.2221	3.13243	3.54651	2.5443	0	3.54651	CHROMOSOME_V	6787944	6788432	+	WBGene00043952		cds
Y65B4A.7	6	1.05949	0	0	2.44493	3.03383	3.1775	3.42694	3.09171	2.07798	0	3.42694	CHROMOSOME_I	645629	647245	-	WBGene00022030		cds
W02A2.8	6	1.33827	1.04677	0.924006	2.5771	4.59041	4.88807	4.95917	4.53716	3.17878	0	4.95917	CHROMOSOME_IV	13356168	13358573	-	WBGene00012191		cds
Y47D3A.22	6	1.57181	0.859903	0.898892	2.34928	3.88831	4.23662	4.4147	4.7431	2.89614	0	4.7431	CHROMOSOME_III	11286236	11290600	-	WBGene00012933	mib-1	cds
C15F1.5	6	0.400478	1.36057	0.55096	1.66867	3.12173	3.46085	3.03528	3.73063	3.52582	0	3.73063	CHROMOSOME_II	6967862	6970543	-	WBGene00015796		cds
C34E10.9	6	0	0	0	1.20635	3.07466	3.24589	2.55207	3.09398	2.90502	0	3.24589	CHROMOSOME_III	5262631	5263294	-	WBGene00016410		cds
Y57G7A.5	6	0	0.32306	0	1.36105	3.78241	3.60411	3.16877	3.27944	3.17878	0	3.78241	CHROMOSOME_II	1273214	1275542	-	WBGene00021968		cds
F44G4.5	6	0	0.729826	0	2.16567	4.3893	4.5307	4.69601	4.60737	4.10071	0	4.69601	CHROMOSOME_II	8999719	9000311	-	WBGene00009714		cds
Y47D3A.10	6	0	1.1113	0	2.65917	5.08607	5.27397	5.16682	4.95972	4.9907	0	5.27397	CHROMOSOME_III	11216296	11218161	-	WBGene00006553	tbx-34	cds
Y50E8A.9	6	0	0.493092	0	1.66867	3.12383	3.26733	3.20791	2.79605	3.31511	0	3.31511	CHROMOSOME_V	14778319	14779699	-	WBGene00013052	scrm-7	cds
F54H12.8	6	0.400478	0.729826	0	1.45595	3.39693	3.6224	3.01335	2.87847	3.53156	0	3.6224	CHROMOSOME_III	7966536	7969156	-	WBGene00045247		cds
W03D8.3	6	1.37836	1.00283	0.749507	2.59824	4.2928	4.86461	4.66242	4.26496	4.1669	0	4.86461	CHROMOSOME_I	2820845	2822302	-	WBGene00020986		cds
C02F5.10	6	1.05949	1.04677	0.898892	1.50076	3.46986	3.56215	4.29764	3.33658	2.89614	0	4.29764	CHROMOSOME_III	8248614	8249410	-	WBGene00015351		cds
C12D8.9	6	0	0	0	0.521899	3.72329	4.24646	3.51403	3.22245	2.3299	0	4.24646	CHROMOSOME_V	10242830	10243153	-	WBGene00007538		cds
F13A7.7	6	0	0	0	1.20635	3.43934	4.23562	3.94449	3.09307	2.07798	0	4.23562	CHROMOSOME_V	16382057	16383809	-	WBGene00008725		cds
K03H1.9	6	0	0	0	0.90434	2.88362	3.33169	2.95905	2.30955	1.77257	0	3.33169	CHROMOSOME_III	9940683	9941376	-	WBGene00010544		cds
C16D9.5	6	0.400478	0.859903	0.282331	1.66867	3.83697	4.51693	4.47387	3.68886	2.90502	0	4.51693	CHROMOSOME_V	8243612	8245234	-	WBGene00015860		cds
C38C10.3	6	0	0.729826	0	1.66867	4.23168	4.63488	4.56902	4.00668	2.89614	0	4.63488	CHROMOSOME_III	9384042	9385513	-	WBGene00008001		cds
W08E3.4	6	0	1.1521	0.282331	1.45595	3.75349	3.90585	3.76912	3.22162	2.74087	0	3.90585	CHROMOSOME_I	13337449	13338910	-	WBGene00012345		cds
K11H3.2	6	0.819049	0	0	1.09281	3.40256	3.3409	3.18068	2.62314	2.3299	0	3.40256	CHROMOSOME_III	9846371	9847434	+	WBGene00010779		cds
Y71G12A.4	6	0.530369	0	0.721132	1.20635	4.25274	3.841	4.0904	3.02566	2.55562	0	4.25274	CHROMOSOME_I	1885207	1894865	-	WBGene00022140		cds
AC7.3	6	0	0.32306	0.282331	2.07861	3.6309	3.11864	2.62364	2.71396	3.05238	0	3.6309	CHROMOSOME_IV	5111678	5112867	+	WBGene00014997		cds
C08F11.10	6	0	0	0	3.52942	5.02701	4.63037	4.29577	4.80416	4.17059	0	5.02701	CHROMOSOME_IV	13648013	13649186	-	WBGene00007457		cds
Y76A2A.1	6	0	0.493092	0	2.97918	4.40389	4.39291	3.9653	4.07543	3.9627	0	4.40389	CHROMOSOME_III	13459481	13460543	+	WBGene00006509	tag-164	cds
M03E7.3	6	0	0	0	1.58716	2.24035	2.45816	1.90889	1.9145	2.55562	0	2.55562	CHROMOSOME_V	5615009	5616165	+	WBGene00019755		cds
ZK507.3	6	0.400478	0	0	2.55602	3.53653	3.40212	2.73541	2.71218	3.30843	0	3.53653	CHROMOSOME_III	9101286	9103033	+	WBGene00013979		cds
B0361.11	6	0	0	0.282331	1.78258	3.80816	3.53345	3.44343	2.95444	2.3299	0	3.80816	CHROMOSOME_III	7277540	7281153	+	WBGene00015165		cds
T11F8.4	6	0	0	0.282331	2.24683	5.10603	5.02086	4.65962	4.4082	3.62334	0	5.10603	CHROMOSOME_IV	5474118	5476559	-	WBGene00020435		cds
K11C4.1	6	0.400478	0	0.749507	2.55602	4.4773	4.79517	4.41298	3.9698	3.04437	0	4.79517	CHROMOSOME_V	6896981	6898478	+	WBGene00019642		cds
R08A2.2	6	0.400478	0	0.282331	2.55602	4.23217	4.57985	4.24382	3.85584	3.18608	0	4.57985	CHROMOSOME_V	14714231	14715675	-	WBGene00011133		cds
C09D4.9	6	0	0.32306	0.749507	2.07861	3.72432	4.08344	3.36564	3.28064	2.90502	0	4.08344	CHROMOSOME_I	5487379	5488218	-	WBGene00206357		cds
C09D4.3	6	0	0.586849	0.749507	4.0757	5.63111	5.50982	5.43529	4.90502	4.61462	0	5.63111	CHROMOSOME_I	5488343	5490629	+	WBGene00015634		cds
Y25C1A.13	6	0	0.32306	0.282331	2.65917	3.72432	3.78938	3.91157	3.15921	3.31511	0	3.91157	CHROMOSOME_II	3109374	3111230	-	WBGene00021296		cds
C50E10.2	6	0	0.32306	0	2.16567	4.03499	3.841	3.77699	3.16095	2.90502	0	4.03499	CHROMOSOME_II	12305392	12309650	-	WBGene00016826		cds
R102.10	6	0	0	0	2.71762	4.47565	4.27271	4.17606	3.59672	3.62871	0	4.47565	CHROMOSOME_IV	10705443	10707264	+	WBGene00011297		cds
ZC250.5	6	0	0	0	2.49048	4.0591	4.07683	4.07133	3.22203	3.04437	0	4.07683	CHROMOSOME_V	5805750	5807553	+	WBGene00045306		cds
C23G10.1	6	0	0.32306	0.51835	2.81018	4.12335	4.32666	4.20551	3.34079	2.90502	0	4.32666	CHROMOSOME_III	6209154	6212832	+	WBGene00016010		cds
Y48B6A.5	6	0	0.859903	0	3.29306	5.46834	5.74237	5.40855	4.7863	3.88617	0	5.74237	CHROMOSOME_II	14172762	14175099	-	WBGene00012979		cds
K09C6.2	6	0	0	0	1.20635	2.23841	2.60323	1.85042	1.91553	1.77257	0	2.60323	CHROMOSOME_V	856850	858454	+	WBGene00019556		cds
Y49F6B.8	6	0	0	0	1.66867	2.98259	3.32053	2.86387	2.7104	2.74087	0	3.32053	CHROMOSOME_II	3479476	3481688	-	WBGene00021720		cds
F08F8.6	6	0	0	0	1.40886	3.12068	2.55012	3.3692	2.19488	2.07798	0	3.3692	CHROMOSOME_III	7343707	7345760	+	WBGene00017271		cds
Y69A2AR.23	6	0	0	0	1.66867	4.03582	3.55265	3.95603	2.95244	2.3299	0	4.03582	CHROMOSOME_IV	2549951	2551649	-	WBGene00022094		cds
F35C5.1	6	0	0	0	1.20635	2.71873	2.88127	2.94515	2.19403	2.34302	0	2.94515	CHROMOSOME_II	12880735	12882160	+	WBGene00009390		cds
B0432.11	6	0	0	0	2.71762	4.58794	3.841	3.84338	2.79716	3.18608	0	4.58794	CHROMOSOME_II	293864	294642	-	WBGene00015192		cds
W03F9.3	6	0	0	0	1.66867	2.82794	2.74894	2.71917	1.75715	2.55562	0	2.82794	CHROMOSOME_V	132466	132998	-	WBGene00021001		cds
F19C7.5	6	0	0.32306	0	2.04874	2.39121	2.63657	2.80877	1.57531	2.34302	0	2.80877	CHROMOSOME_IV	4595950	4596727	+	WBGene00017595		cds
C05C12.1	6	0	0	0	2.55602	3.6942	3.47765	3.70196	4.1406	1.77257	0	4.1406	CHROMOSOME_IV	11253963	11255698	+	WBGene00007335		cds
C17G10.3	6	0	0	0	2.55602	4.27208	4.43659	4.23242	4.32362	2.34302	0	4.43659	CHROMOSOME_II	5583019	5584731	+	WBGene00015917		cds
F18A12.5	6	0	0	0	2.29942	3.57162	3.58716	3.47279	3.68826	1.77257	0	3.68826	CHROMOSOME_II	3395824	3399306	-	WBGene00017554		cds
F08B1.2	6	0	0	0	2.82787	4.12544	4.37327	3.92338	4.74208	2.34302	0	4.74208	CHROMOSOME_II	5312103	5317348	+	WBGene00001538	gcy-12	cds
F02E11.1	6	0	0	0.282331	2.99493	4.20858	4.16048	3.68533	4.07703	2.3299	0	4.20858	CHROMOSOME_II	3279093	3281710	+	WBGene00017179	wht-4	cds
F40E3.5	6	0	0	0.282331	2.8803	4.4738	4.25623	4.07133	4.07497	2.3299	0	4.4738	CHROMOSOME_I	2645268	2657243	-	WBGene00018232		cds
Y55B1AR.4	6	0	0	0	3.07173	4.49122	3.95354	4.1112	4.43317	2.73092	0	4.49122	CHROMOSOME_III	604004	605509	-	WBGene00021908		cds
T20F5.5	6	0.400478	1.00283	0.282331	3.81478	5.46793	5.71532	5.16981	5.18217	3.41502	0	5.71532	CHROMOSOME_I	3917882	3920175	-	WBGene00020627		cds
Y39G10AR.15	6	0.400478	0.586849	0.282331	3.10087	3.98552	3.88456	3.80034	4.00403	2.5443	0	4.00403	CHROMOSOME_I	2323826	2327331	-	WBGene00021471		cds
ZK1010.5	6	0	0.586849	0.282331	3.9512	4.75589	5.13875	5.34044	5.59072	3.04437	0	5.59072	CHROMOSOME_III	12984398	12987401	-	WBGene00014179		cds
ZC155.2	6	0	0	0	2.29942	2.93186	3.44038	2.89312	2.87689	1.77257	0	3.44038	CHROMOSOME_III	5219266	5220328	+	WBGene00022530		cds
ZC21.8	6	0	0	0	2.29942	3.32377	3.77448	3.25374	3.39633	2.07798	0	3.77448	CHROMOSOME_III	8518842	8519899	-	WBGene00022507		cds
ZK945.6	6	0	0	0	2.29942	3.54007	3.87061	2.94515	3.54884	2.3299	0	3.87061	CHROMOSOME_II	10106021	10106845	-	WBGene00014168		cds
C47E8.1	6	0	0	0.282331	3.13045	4.47504	4.26691	4.24949	3.64119	2.89614	0	4.47504	CHROMOSOME_V	14666088	14667090	+	WBGene00008141		cds
K08D10.7	6	0	0	0	3.08677	4.36706	4.15527	3.97668	3.59672	2.5443	0	4.36706	CHROMOSOME_IV	4164685	4166222	+	WBGene00019530	scrm-8	cds
W01B11.2	6	0	0	0	2.22028	2.93186	3.04378	3.03528	2.62314	1.77257	0	3.04378	CHROMOSOME_I	3287384	3293173	+	WBGene00020914	sulp-6	cds
W02D7.4	6	0	0	0	2.63926	3.40212	3.3915	3.35517	3.02423	2.07798	0	3.40212	CHROMOSOME_V	8296538	8297522	-	WBGene00020940		cds
F11G11.14	6	0	0.493092	0	3.76955	5.85802	5.74446	5.53055	5.19767	3.52005	0	5.85802	CHROMOSOME_II	4863708	4865736	+	WBGene00044384		cds
T23B7.2	6	0	0.493092	0	3.76955	5.87755	5.78862	5.62645	5.16628	3.41502	0	5.87755	CHROMOSOME_II	4841372	4842202	-	WBGene00044298		cds
F42G4.6	6	0	0	0	3.62415	5.60056	5.85742	5.54748	5.18067	3.71973	0	5.85742	CHROMOSOME_II	13079346	13080686	+	WBGene00009643		cds
Y81G3A.1	6	0	0	0	3.45105	5.53606	5.6336	5.31628	4.94054	3.53156	0	5.6336	CHROMOSOME_II	13082434	13083606	-	WBGene00013590		cds
W04E12.4	6	0.400478	0	0	3.65439	4.89142	5.08045	5.08269	4.29587	2.5443	0	5.08269	CHROMOSOME_V	19743614	19745719	+	WBGene00012249		cds
ZK507.1	6	0	0	0	2.10839	3.02992	3.09485	3.34125	2.42158	1.77257	0	3.34125	CHROMOSOME_III	9099552	9101181	-	WBGene00013978		cds
ZK1098.12	6	0	0.80978	0.282331	3.81478	4.78426	4.73624	4.76875	3.97104	3.17878	0	4.78426	CHROMOSOME_III	9545103	9545784	+	WBGene00194691		cds
C14A6.13	6	0	0	0.51835	4.09043	5.30353	5.24919	5.26138	5.35746	4.1669	0	5.35746	CHROMOSOME_V	18159625	18161311	-	WBGene00050956		cds
D1081.12	6	0	0	0	3.48511	4.44106	4.59303	4.95003	4.95897	3.62334	0	4.95897	CHROMOSOME_I	8474076	8474726	-	WBGene00086554		cds
F36H12.9	6	0.400478	0	0.282331	4.84364	6.0318	6.21663	6.22579	6.53909	4.91128	0	6.53909	CHROMOSOME_IV	5257062	5258300	+	WBGene00018123		cds
R13H9.6	6	0	0	0.282331	4.92457	6.02625	6.2432	6.25936	6.53897	4.50777	0	6.53897	CHROMOSOME_IV	5067356	5068644	-	WBGene00020072		cds
C17C3.15	6	0	0	0.282331	2.79162	3.57009	4.02053	3.82832	4.23501	2.89614	0	4.23501	CHROMOSOME_II	5571285	5571948	+	WBGene00015896		cds
F36A2.14	6	0	0	0.51835	3.54	4.90372	5.11743	4.57354	5.14781	3.61796	0	5.14781	CHROMOSOME_I	8824425	8825616	-	WBGene00023490		cds
T05F1.8	6	0.530369	0.729826	0.51835	4.58547	5.80557	5.86127	5.89431	6.28455	5.02068	0	6.28455	CHROMOSOME_I	9642335	9643785	+	WBGene00011493		cds
C33F10.12	6	0.400478	0	0.51835	3.97536	5.74295	6.25862	6.18454	6.66848	4.74541	0	6.66848	CHROMOSOME_II	4836299	4837729	-	WBGene00016358		cds
Y73F8A.15	6	0	0	0	2.63926	3.75349	4.10201	3.99703	4.48757	3.30173	0	4.48757	CHROMOSOME_IV	15321589	15322148	+	WBGene00013524		cds
D2063.4	6	0.400478	0	0.282331	3.66409	4.57453	4.66091	4.90293	5.11855	3.05238	0	5.11855	CHROMOSOME_V	4336675	4338912	+	WBGene00044529		cds
F32B4.2	6	0.530369	0.32306	0.721132	4.58557	5.89936	5.96007	6.36478	6.02943	4.10071	0	6.36478	CHROMOSOME_I	11512812	11513824	-	WBGene00009313		cds
Y46C8AL.1	6	0.400478	0	0.282331	3.85	5.30272	5.49255	5.83345	5.79091	3.88617	0	5.83345	CHROMOSOME_IV	3953929	3956200	-	WBGene00021579	clec-73	cds
R10F2.6	6	0.713599	0.729826	0.51835	3.15894	4.29023	4.26789	4.56902	4.67645	3.30173	0	4.67645	CHROMOSOME_III	2937039	2944036	-	WBGene00019997		cds
C18H7.4	6	0.400478	0	0.282331	2.82787	4.05882	4.1904	3.64291	4.67857	3.17878	0	4.67857	CHROMOSOME_IV	593334	595234	+	WBGene00015994		cds
F07F6.1	6	0.819049	0.493092	0	3.52942	4.86447	4.66091	4.82036	4.35351	3.41502	0	4.86447	CHROMOSOME_II	5437874	5440239	+	WBGene00017215		cds
ZK84.2	6	0.400478	0.32306	0	3.39217	5.07062	4.77216	5.33063	4.74237	3.8006	0	5.33063	CHROMOSOME_II	6014348	6015812	+	WBGene00022650		cds
F38A5.6	6	0.400478	0	0	2.49048	4.18862	3.93294	3.72912	3.5964	2.73092	0	4.18862	CHROMOSOME_IV	6596092	6597387	-	WBGene00018163		cds
F23B2.7	6	0.530369	0	0	2.6788	4.34986	4.34787	4.41974	4.37981	3.42122	0	4.41974	CHROMOSOME_IV	9150477	9152029	+	WBGene00009075		cds
Y53F4A.2	6	0.530369	0.32306	0.282331	3.47371	4.85214	5.07439	4.95232	4.74194	4.10457	0	5.07439	CHROMOSOME_II	14876071	14877088	-	WBGene00013148		cds
C06G4.4	6	0.400478	0.859903	0	3.62415	4.52664	4.57516	4.24756	4.23542	3.62334	0	4.57516	CHROMOSOME_III	7977151	7979695	-	WBGene00015558		cds
C16C8.18	6	1.22212	1.21218	0	4.4483	5.97356	5.82294	5.57855	5.7051	4.34901	0	5.97356	CHROMOSOME_II	3429409	3431308	+	WBGene00015855		cds
C55C3.3	6	0.819049	0.729826	1.49953	3.2272	4.59041	4.94424	4.87387	4.86581	3.52005	0	4.94424	CHROMOSOME_IV	5685282	5688293	+	WBGene00016953		cds
T10E9.4	6	0.530369	0.933135	1.75606	4.87809	6.36719	7.2995	7.74514	7.62115	5.58073	0	7.74514	CHROMOSOME_I	6525050	6528690	+	WBGene00020414		cds
F14F7.4	6	0.530369	0	0.924006	3.20053	5.17043	4.90373	4.86038	4.94231	3.30843	0	5.17043	CHROMOSOME_III	13028280	13029563	-	WBGene00008811		cds
Y105E8A.27	6	0	0.32306	0.721132	3.60357	5.91197	5.82786	6.15063	5.72722	3.95417	0	6.15063	CHROMOSOME_I	14441528	14444320	+	WBGene00013684		cds
Y65B4BL.7	6	0	0.32306	0.898892	2.22028	3.66632	3.68747	4.00816	3.44874	2.3299	0	4.00816	CHROMOSOME_I	508853	510840	-	WBGene00022039		cds
C25D7.16	6	0	0	0.55096	2.65917	3.93937	3.69613	4.11332	3.85637	2.07798	0	4.11332	CHROMOSOME_V	15056272	15056727	+	WBGene00050940		cds
Y54G2A.49	6	0	0	0.282331	2.51253	3.88954	3.69467	3.90686	3.6443	2.07798	0	3.90686	CHROMOSOME_IV	2851691	2852872	-	WBGene00044492		cds
F42G4.2	6	0	0.493092	0.898892	3.30529	5.0609	4.96407	4.70831	4.561	2.5443	0	5.0609	CHROMOSOME_II	13047871	13050733	+	WBGene00009641		cds
ZC581.7	6	0.530369	0.493092	0.898892	3.29283	4.79422	4.55706	4.62814	4.51156	2.3299	0	4.79422	CHROMOSOME_I	6660449	6662315	-	WBGene00022634		cds
F02C9.4	6	0	0.32306	0.721132	3.54	4.81226	4.77147	4.64544	5.10194	2.5443	0	5.10194	CHROMOSOME_V	3137470	3138208	-	WBGene00017175		cds
K09C6.1	6	0	0	0.55096	2.71762	3.69597	3.2221	3.59334	3.81511	1.77257	0	3.81511	CHROMOSOME_V	859121	862060	+	WBGene00019555		cds
R155.2	6	0	0	1.07966	3.28003	4.23193	4.2137	4.69743	4.74237	2.3299	0	4.74237	CHROMOSOME_III	1963547	1969892	-	WBGene00020116		cds
C50F4.2	6	0.400478	0	1.22014	3.43938	4.55771	4.35698	4.32644	3.93145	2.74087	0	4.55771	CHROMOSOME_V	9531795	9534513	+	WBGene00008230		cds
ZK524.1	6	0	0	1.44851	4.03764	5.22314	5.15924	5.15987	4.92366	3.52582	0	5.22314	CHROMOSOME_I	7454665	7456883	+	WBGene00004958	spe-4	cds
F36F12.7	6	0	0	0.721132	3.88452	4.63682	4.18937	4.37213	4.0424	2.5443	0	4.63682	CHROMOSOME_V	2099336	2100079	+	WBGene00018098		cds
T25D10.5	6	0.400478	0.493092	0.898892	4.02222	4.71147	4.66824	4.48516	4.32556	2.55562	0	4.71147	CHROMOSOME_II	6401941	6403070	+	WBGene00020802	btb-2	cds
W03D8.2	6	0	0.32306	0.282331	3.22768	4.10163	3.91946	3.45328	3.44803	2.07798	0	4.10163	CHROMOSOME_I	2798215	2799891	-	WBGene00020985		cds
T27A3.5	6	0	0.729826	1.22014	4.63675	5.65395	6.0441	5.95618	5.24433	3.30843	0	6.0441	CHROMOSOME_I	6100265	6101683	-	WBGene00020841		cds
R13A5.11	6	0	0.32306	0.898892	3.14464	4.05388	3.32981	3.47279	3.85664	2.5443	0	4.05388	CHROMOSOME_III	7591510	7593272	-	WBGene00020053		cds
Y66D12A.20	6	0.400478	0.933135	1.05713	3.52923	4.78211	4.26887	3.93988	4.2939	2.5443	0	4.78211	CHROMOSOME_III	11505451	11508816	+	WBGene00004960	spe-6	cds
C29E6.3	6	0.530369	0.493092	0.51835	4.41889	5.17969	5.12011	5.20815	4.97693	3.88617	0	5.20815	CHROMOSOME_IV	11876135	11877757	-	WBGene00004084	pph-2	cds
ZK809.1	6	0.530369	0.493092	0.51835	4.44226	5.30109	4.95449	5.13462	4.86381	3.88617	0	5.30109	CHROMOSOME_IV	11642079	11643683	+	WBGene00014085		cds
C56G2.5	6	0	0	0.282331	3.63406	4.05663	3.80412	3.95146	3.6443	2.74087	0	4.05663	CHROMOSOME_III	6320806	6324182	-	WBGene00016980		cds
W06D4.2	6	0.400478	0	0.898892	4.75319	5.45106	5.04365	5.41533	5.22818	3.8006	0	5.45106	CHROMOSOME_I	9056287	9057815	+	WBGene00012296		cds
F40G12.10	6	0.530369	0	0.898892	4.16914	5.1597	5.28262	4.66532	4.62978	3.88617	0	5.28262	CHROMOSOME_V	14283554	14285312	+	WBGene00009605		cds
F58D5.7	6	0	0	0.51835	3.68383	4.89126	4.83487	4.31567	4.48584	3.30843	0	4.89126	CHROMOSOME_I	12032325	12033694	-	WBGene00010246		cds
F59A6.4	6	0.400478	0	0.721132	3.36797	4.67982	4.85304	4.18402	4.3518	3.30843	0	4.85304	CHROMOSOME_II	5005085	5008061	+	WBGene00019086		cds
T15B12.2	6	0	0	0.51835	3.11586	3.88429	3.79745	3.20022	3.73296	2.90502	0	3.88429	CHROMOSOME_III	5300003	5301847	-	WBGene00020531		cds
Y75B7B.1	6	0	0	0	3.02592	3.57009	3.75943	2.99997	3.68766	2.89614	0	3.75943	CHROMOSOME_V	1270912	1272973	+	WBGene00022288		cds
C52E12.6	6	0	0.32306	0.898892	3.26689	3.91346	4.13845	4.06492	4.40802	3.42122	0	4.40802	CHROMOSOME_II	7022885	7024888	+	WBGene00016890		cds
F36A2.12	6	0	0	1.05713	4.78103	5.63	5.33018	5.55821	5.86885	4.50777	0	5.86885	CHROMOSOME_I	8826159	8826646	-	WBGene00009459		cds
Y113G7C.1	6	0.400478	0	0.898892	4.96518	5.7981	5.72665	6.16924	6.10271	4.79289	0	6.16924	CHROMOSOME_V	20317806	20323980	+	WBGene00013771		cds
Y37D8A.5	6	0	0	1.05713	4.60585	5.16098	5.19578	5.75667	5.70495	4.79289	0	5.75667	CHROMOSOME_III	12853952	12855497	-	WBGene00012547		cds
F47B3.1	6	0	0.493092	1.46572	4.8653	5.39479	5.68522	5.53128	5.64889	4.17059	0	5.68522	CHROMOSOME_I	3972165	3974023	+	WBGene00018525		cds
F47B3.6	6	0	0.493092	1.22014	4.7625	5.32918	5.51919	5.4286	5.47958	4.10457	0	5.51919	CHROMOSOME_I	3965741	3967078	-	WBGene00018530		cds
F54C1.9	6	0	0.586849	1.46572	4.61134	5.73541	5.62532	5.96708	5.44156	4.35226	0	5.96708	CHROMOSOME_I	5006746	5007991	+	WBGene00006058	sst-20	cds
C55B7.3	6	0	0.729826	1.07966	4.90781	5.72054	5.28787	5.0901	5.59048	4.83422	0	5.72054	CHROMOSOME_I	6499843	6501415	+	WBGene00016942		cds
C43E11.5	6	1.40754	0	1.57443	4.89535	6.15611	6.20657	5.65021	5.99259	4.45878	0	6.20657	CHROMOSOME_I	4237035	4238739	+	WBGene00016605		cds
C50F2.5	6	1.40754	0	1.46572	4.84372	6.18807	6.09922	5.67425	5.93787	4.56078	0	6.18807	CHROMOSOME_I	3895795	3897403	-	WBGene00016839		cds
Y37E11AL.2	6	1.26552	0.933135	1.44851	4.41889	5.30387	5.03685	5.50321	5.58919	4.17059	0	5.58919	CHROMOSOME_IV	3698508	3699718	+	WBGene00021358		cds
C34D4.2	6	0.530369	0	0.898892	4.00705	4.90295	4.31546	4.19767	4.04193	3.53156	0	4.90295	CHROMOSOME_IV	7154712	7156005	+	WBGene00016398		cds
T04B2.2	6	0	0	1.05713	4.06761	5.36763	4.52017	4.58998	4.4855	3.9627	0	5.36763	CHROMOSOME_IV	10043740	10045682	+	WBGene00001487	frk-1	cds
C50D2.3	6	0	0	0.51835	3.45085	4.89111	4.03195	3.83329	3.59672	3.42122	0	4.89111	CHROMOSOME_II	106257	107521	+	WBGene00016807		cds
Y46H3D.1	6	0.400478	0	0.282331	3.98328	5.12546	4.44515	4.32461	3.96956	3.71469	0	5.12546	CHROMOSOME_V	1642511	1643118	+	WBGene00021608		cds
ZK1251.3	6	0	0	0.721132	3.31876	4.71059	4.20663	4.2718	3.34156	3.30843	0	4.71059	CHROMOSOME_IV	9683647	9684456	+	WBGene00014241		cds
T01H3.5	6	0	0	0	2.94658	3.53534	3.54308	2.99997	2.79661	2.74087	0	3.54308	CHROMOSOME_II	7879705	7880413	+	WBGene00011351		cds
ZK849.5	6	0	0.32306	0	2.82787	3.66091	3.1775	3.21188	2.62314	2.90502	0	3.66091	CHROMOSOME_I	14200008	14204677	+	WBGene00014103		cds
R03D7.5	6	0.400478	0	0	2.69851	3.36126	3.23405	2.5883	3.09353	2.07798	0	3.36126	CHROMOSOME_II	10947506	10949124	+	WBGene00010991		cds
T10B5.2	6	0	0	0	2.86293	3.69491	2.9932	3.04834	3.39412	2.07798	0	3.69491	CHROMOSOME_V	1848074	1851490	-	WBGene00020388		cds
Y57A10B.7	6	0	0	0	2.99521	3.96278	3.66118	3.33762	3.54685	2.3299	0	3.96278	CHROMOSOME_II	12392636	12393679	-	WBGene00013279		cds
T28C12.3	6	0	0	0	2.86293	3.69244	2.9932	2.86387	2.87636	2.07798	0	3.69244	CHROMOSOME_V	6327229	6328810	+	WBGene00020890	fbxa-202	cds
F27D4.5	6	2.2694	2.16389	3.34443	3.99073	4.2501	4.87227	4.61653	4.76479	4.10841	2.79839	2.70838	CHROMOSOME_I	7727261	7729072	+	WBGene00006518	tag-173	cds
ZK418.6	6	0	0	1.38479	2.37401	3.80783	4.08233	3.86064	3.44589	3.42122	0	4.08233	CHROMOSOME_III	7074190	7078774	-	WBGene00022735		cds
B0207.1	6	0	0	0.51835	1.20635	3.20656	3.19997	2.32796	2.95244	0.852432	0	3.20656	CHROMOSOME_I	5965064	5967213	+	WBGene00015026		cds
Y57G11C.1130	6	0.713599	0	0.924006	1.70742	3.07791	3.45914	3.06129	3.22162	1.38465	0	3.45914	CHROMOSOME_IV	14782612	14783363	+	WBGene00194649		cds
B0524.2	6	0	0	0	0.521899	2.77937	2.74894	1.63672	2.18893	0.852432	0	2.77937	CHROMOSOME_III	1894049	1899847	+	WBGene00015241		cds
CD4.1	6	0	0	0	0.521899	1.86984	1.79377	1.27195	1.3702	0.852432	0	1.86984	CHROMOSOME_V	5606583	5609302	+	WBGene00016988		cds
BE10.5	6	0	0	0	0.90434	3.20904	3.41267	2.77773	2.71277	1.38465	0	3.41267	CHROMOSOME_III	12806109	12806754	-	WBGene00044127		cds
Y106G6D.4	6	0	0	0	0.90434	2.77336	3.18774	2.50247	2.31268	1.38465	0	3.18774	CHROMOSOME_I	10114782	10116576	+	WBGene00013701		cds
F15D3.4	6	0	0	0	1.20635	3.24718	3.76767	3.14048	2.62188	1.38465	0	3.76767	CHROMOSOME_I	11565229	11570794	+	WBGene00008854		cds
F08A8.8	6	0	0.32306	0	1.25947	3.53889	3.36099	2.95905	2.87689	1.38465	0	3.53889	CHROMOSOME_I	12954001	12955205	-	WBGene00045468		cds
H23L24.2	6	0	0	0	1.09281	3.32468	3.24589	2.62364	2.87742	1.38465	0	3.32468	CHROMOSOME_IV	8715234	8717844	+	WBGene00019229		cds
F28D1.8	6	0.400478	0.493092	0	1.36105	4.21105	4.13738	3.98349	3.39485	1.77257	0	4.21105	CHROMOSOME_IV	12387668	12389889	-	WBGene00009217		cds
C06A5.2	6	0	0.493092	0	2.10839	4.03387	4.14372	3.91627	3.44732	1.77257	0	4.14372	CHROMOSOME_I	6006335	6007326	+	WBGene00015500		cds
F56D6.14	6	0	0.32306	0	2.16567	4.45867	4.80586	4.53547	3.81484	2.3299	0	4.80586	CHROMOSOME_IV	3917699	3918039	+	WBGene00044476		cds
F12A10.4	6	0	0	0	1.36105	3.1612	3.11864	2.95905	2.31112	1.77257	0	3.1612	CHROMOSOME_II	5488134	5490589	+	WBGene00017393		cds
F15H10.7	6	0	0	0	1.20635	2.88115	2.78185	2.50247	2.19148	1.38465	0	2.88115	CHROMOSOME_V	10403161	10406401	-	WBGene00008874		cds
T16G12.7	6	0	0	0	1.9215	3.47109	3.69467	3.27612	2.62125	1.77257	0	3.69467	CHROMOSOME_III	10038452	10040085	-	WBGene00011808		cds
C18C4.10	6	0.400478	0.32306	0	1.66867	2.82858	2.95284	2.48336	2.19148	1.38465	0	2.95284	CHROMOSOME_V	5575394	5581697	-	WBGene00002215	klc-2	cds
C17D12.5	6	0	0.32306	0	2.01824	3.98898	3.99387	3.12011	3.49966	2.07798	0	3.99387	CHROMOSOME_I	11586227	11587322	+	WBGene00007639		cds
R03D7.8	6	0.400478	0	0	1.85402	3.40256	3.3915	2.73541	3.02566	1.38465	0	3.40256	CHROMOSOME_II	10953534	10956818	-	WBGene00010992		cds
ZK1128.3	6	0.400478	0	0	1.78258	4.08119	3.95953	3.86064	3.85691	1.38465	0	4.08119	CHROMOSOME_III	10116875	10118785	-	WBGene00014229		cds
ZK673.6	6	0	0	0	1.15019	2.77136	2.66915	2.22453	2.52352	0.852432	0	2.77136	CHROMOSOME_II	10462810	10464270	-	WBGene00014062		cds
C34F11.3	6	0.400478	0	0.749507	2.01824	4.76923	4.58294	4.45605	4.60833	3.04437	0	4.76923	CHROMOSOME_II	5203303	5209786	+	WBGene00016415		cds
R06A10.5	6	0.400478	0	0.55096	1.40886	3.9619	3.79609	3.48877	3.44803	1.77257	0	3.9619	CHROMOSOME_I	1088517	1089745	+	WBGene00044895		cds
F44D12.6	6	0.400478	0.493092	0	2.65917	4.54128	5.15243	4.29938	4.07543	1.38465	0	5.15243	CHROMOSOME_IV	10033334	10034815	+	WBGene00009683		cds
Y66D12A.3	6	0.400478	0.586849	0	1.85402	3.60326	4.34329	3.24242	3.16008	1.38465	0	4.34329	CHROMOSOME_III	11589780	11592737	+	WBGene00013429		cds
T25B9.5	6	0	0	0	1.45595	3.39909	3.66267	2.62364	2.42448	0.852432	0	3.66267	CHROMOSOME_IV	10752410	10754569	-	WBGene00012011		cds
Y69E1A.3	6	0	0.493092	0	1.45595	3.4347	3.59488	2.50247	2.52689	0.852432	0	3.59488	CHROMOSOME_IV	10952338	10954665	+	WBGene00013475		cds
C10G11.10	6	0	0	0	0.90434	2.23841	3.20203	2.34922	2.42448	1.38465	0	3.20203	CHROMOSOME_I	6305028	6306382	-	WBGene00015690		cds
C34F11.1	6	0	0	0	1.36105	2.59981	3.8719	2.6523	2.19148	1.38465	0	3.8719	CHROMOSOME_II	5212952	5213923	+	WBGene00016413		cds
B0513.5	6	0	0	0	1.09281	2.7747	2.8272	2.98181	2.06195	0.852432	0	2.98181	CHROMOSOME_IV	13868529	13876592	-	WBGene00007197		cds
R09E10.4	6	0	0	0	0.90434	2.15753	2.18657	2.34922	1.75829	0.852432	0	2.34922	CHROMOSOME_IV	10304825	10307902	-	WBGene00011174		cds
R02D3.1	6	0	0	0.282331	1.88815	4.19187	4.58373	5.00229	3.77547	1.38465	0	5.00229	CHROMOSOME_IV	245121	251924	+	WBGene00019819		cds
Y116F11B.8	6	0	0	0.282331	1.66867	3.39953	3.43179	3.55121	2.62377	0.852432	0	3.55121	CHROMOSOME_V	19857592	19860925	+	WBGene00013824		cds
Y73B6A.1	6	0	0	0	1.36105	3.53731	3.5794	3.51724	2.95544	0.852432	0	3.5794	CHROMOSOME_IV	6661223	6668043	-	WBGene00022228		cds
K12C11.5	6	0.400478	0	0	1.45595	3.24862	2.79532	3.13243	2.52554	0.852432	0	3.24862	CHROMOSOME_I	1332700	1334076	+	WBGene00044896		cds
R04B5.11	6	0.400478	0	0	1.09281	2.93186	2.73503	2.84901	1.91861	0.852432	0	2.93186	CHROMOSOME_V	10090777	10091227	-	WBGene00011008		cds
F38A5.11	6	0	0	0.282331	2.04874	3.96161	3.25567	3.86803	2.95344	0.852432	0	3.96161	CHROMOSOME_IV	6592655	6594518	+	WBGene00018168		cds
K11C4.2	6	0	0	0.282331	1.45595	2.45695	2.01738	2.42446	1.57921	0.852432	0	2.45695	CHROMOSOME_V	6895070	6896768	+	WBGene00019643		cds
R102.3	6	0	0	0.282331	1.66867	2.98317	2.33798	2.93111	2.06288	0.852432	0	2.98317	CHROMOSOME_IV	10690465	10691769	+	WBGene00011290		cds
T27F6.1	6	0	0	0	1.45595	2.88239	2.08917	2.89312	2.19318	0.852432	0	2.89312	CHROMOSOME_I	12470793	12473394	-	WBGene00012102		cds
T04A6.3	6	0	0	0	0.90434	2.59452	1.98947	2.71917	1.75715	0.852432	0	2.71917	CHROMOSOME_III	7605885	7608242	-	WBGene00020202		cds
F18A12.1	6	0	0.32306	0	1.66867	3.96395	3.63743	3.38636	2.95094	0.852432	0	3.96395	CHROMOSOME_II	3416841	3420710	+	WBGene00017550		cds
T23E1.3	6	0	0	0.282331	1.58716	3.20607	2.80866	2.5883	2.06381	0.852432	0	3.20607	CHROMOSOME_IV	3146891	3148882	+	WBGene00020730		cds
Y113G7A.10	6	0	0	0	1.78258	4.03499	3.16508	2.98181	2.3119	0.852432	0	4.03499	CHROMOSOME_V	20040896	20047367	-	WBGene00013747	spe-19	cds
C04E6.5	6	0.530369	0	0	2.01824	3.86303	4.09548	3.9044	3.8944	0.852432	0	4.09548	CHROMOSOME_V	5902116	5904829	+	WBGene00015422		cds
E04F6.11	6	0.400478	0	0	1.66797	3.117	3.36099	3.20791	2.95144	0.852432	0	3.36099	CHROMOSOME_II	7217914	7225607	-	WBGene00000530	clh-3	cds
F23C8.8	6	0.400478	0.493092	0	2.59824	4.18862	4.02625	3.87788	3.7766	0.852432	0	4.18862	CHROMOSOME_I	2429685	2432605	-	WBGene00017737		cds
Y45F3A.1	6	0.400478	0.493092	0.282331	2.2473	3.77975	3.93418	3.62855	3.81649	0.852432	0	3.93418	CHROMOSOME_III	10558090	10561607	-	WBGene00012859		cds
W09C2.1	6	0.400478	0	0	2.49008	3.63237	3.85523	3.5266	3.59768	0.852432	0	3.85523	CHROMOSOME_IV	9615139	9620124	+	WBGene00001249	elt-1	cds
F21C3.7	6	0	0	0.282331	2.16567	3.80816	3.8345	3.9258	4.17491	0.852432	0	4.17491	CHROMOSOME_I	7278800	7279607	-	WBGene00077548		cds
T25B9.4	6	0	0	0	2.27337	3.46945	3.87696	3.62855	4.0062	0.852432	0	4.0062	CHROMOSOME_IV	10755712	10757696	-	WBGene00012010		cds
R09E10.1	6	0	0.493092	0	2.55602	3.46986	4.02625	4.08407	3.9698	0.852432	0	4.08407	CHROMOSOME_IV	10319329	10321130	-	WBGene00011171		cds
C08F8.4	6	0	0.32306	0	2.99465	4.12413	4.39201	4.06492	3.97129	1.38465	0	4.39201	CHROMOSOME_IV	11157128	11159471	-	WBGene00007446	mboa-4	cds
C25G4.8	6	0	0	0	1.66867	2.65832	2.77911	2.77773	2.62251	0.852432	0	2.77911	CHROMOSOME_IV	12459796	12463411	-	WBGene00007735		cds
F46A8.6	6	0	0	0	2.65917	4.01103	4.23562	4.03033	3.68886	1.38465	0	4.23562	CHROMOSOME_I	11243828	11244995	-	WBGene00009749		cds
Y57G11C.6	6	0	0	0	2.75543	3.75586	3.87825	4.11544	3.93196	1.38465	0	4.11544	CHROMOSOME_IV	14758387	14760864	-	WBGene00013304		cds
Y116A8C.4	6	0	0.32306	0	2.55602	4.19062	3.89211	4.32461	3.81594	1.38465	0	4.32461	CHROMOSOME_IV	16920350	16924084	+	WBGene00013785		cds
C32C4.3	6	0	0	0	1.45595	2.82923	3.07066	3.14464	2.95244	0.852432	0	3.14464	CHROMOSOME_V	10644999	10646942	-	WBGene00007863		cds
C32D5.4	6	0	0	0	2.10839	3.91437	4.19549	4.07771	3.64461	1.38465	0	4.19549	CHROMOSOME_II	6321308	6323047	-	WBGene00016312		cds
F29D10.1	6	0	0	0	2.01824	3.47151	3.8501	3.74799	3.44767	1.38465	0	3.8501	CHROMOSOME_I	8840627	8841156	+	WBGene00009250		cds
F26A1.3	6	0	0	0	2.13706	4.26877	4.24745	4.32827	3.81704	1.38465	0	4.32827	CHROMOSOME_III	4826873	4828885	+	WBGene00017802		cds
R08C7.8	6	0.400478	0	0	2.32456	3.77975	3.81211	4.12975	3.44732	1.38465	0	4.12975	CHROMOSOME_IV	4433079	4434534	-	WBGene00019951		cds
ZK546.7	6	0	0	0	2.63926	3.96454	4.88241	4.42975	3.9345	1.38465	0	4.88241	CHROMOSOME_II	4930823	4932108	+	WBGene00022763		cds
ZK593.9	6	0	0	0	1.45595	1.97263	2.60323	2.60608	2.42014	0.852432	0	2.60608	CHROMOSOME_IV	10940902	10942846	+	WBGene00014005		cds
C33C12.7	6	0	0	0	2.10839	3.601	3.63895	3.60222	3.02471	0.852432	0	3.63895	CHROMOSOME_II	2174618	2175462	-	WBGene00016339		cds
Y69A2AR.14	6	0	0	0	1.95466	3.12068	2.82454	2.93592	2.3119	0.852432	0	3.12068	CHROMOSOME_IV	2552731	2557104	+	WBGene00022085		cds
C40H1.4	6	0	0	0.282331	2.59824	4.03387	4.03311	4.04773	3.22328	1.38465	0	4.04773	CHROMOSOME_III	9332244	9334191	-	WBGene00001242	elo-4	cds
T23F6.3	6	0	0.32306	0.55096	3.66445	5.34233	5.80805	5.76721	4.82742	2.07798	0	5.80805	CHROMOSOME_IV	12723080	12724579	-	WBGene00011951		cds
Y38H6C.15	6	0	0	0.282331	2.73681	3.77875	4.12568	3.57848	3.33888	1.38465	0	4.12568	CHROMOSOME_V	20534733	20536193	-	WBGene00012627		cds
F13H8.8	6	0	0.493092	0	2.59824	3.93878	4.05233	3.78995	3.33926	0.852432	0	4.05233	CHROMOSOME_II	6265619	6267592	-	WBGene00017441		cds
linc036	6	0	0.32306	0	2.59824	3.72571	4.08233	3.93045	3.34156	0.852432	0	4.08233	CHROMOSOME_IV	5380397	5381206	-	NAN	NAN	linc
F33D11.1	6	0	0.729826	0	2.2473	3.72536	3.75114	3.81812	3.16008	0.852432	0	3.81812	CHROMOSOME_I	5852048	5852965	+	WBGene00018000		cds
M01A10.2	6	0.530369	0.80978	0.282331	1.95466	2.77336	2.84025	3.0221	2.06102	0.852432	0	3.0221	CHROMOSOME_I	5546152	5561645	+	WBGene00006594	tom-1	cds
B0218.5	6	0	0.493092	0	1.95466	3.83633	3.67876	3.87788	3.81676	2.07798	0	3.87788	CHROMOSOME_IV	8155237	8156433	-	WBGene00015049		cds
K07F5.6	6	0	0.493092	0.282331	2.10839	4.12623	4.00088	4.13185	4.48619	2.3299	0	4.48619	CHROMOSOME_IV	9844969	9846627	-	WBGene00010634		cds
T13H10.1	6	0	0.729826	0	2.44493	4.4041	3.89211	4.17606	4.50799	2.5443	0	4.50799	CHROMOSOME_IV	9967057	9969160	-	WBGene00002193	kin-5	cds
C04G2.5	6	0	0	0	2.01824	4.12518	3.79745	3.64584	4.04146	2.3299	0	4.12518	CHROMOSOME_IV	10094179	10095204	-	WBGene00007306		cds
W04E12.5	6	0.530369	0.32306	0.282331	2.34928	4.12361	3.73442	3.51724	3.96881	2.3299	0	4.12361	CHROMOSOME_V	19746122	19748510	+	WBGene00012250		cds
C55A6.3	6	0	0.493092	0	2.01824	3.03271	3.1775	2.80877	3.28224	1.38465	0	3.28224	CHROMOSOME_V	11512289	11513403	-	WBGene00008332		cds
C01B12.4	6	0	0	0	1.25947	2.53173	2.47838	3.13243	2.42448	1.38465	0	3.13243	CHROMOSOME_II	6664	9233	+	WBGene00015287		cds
T08G3.7	6	0	0	0	1.62813	3.36303	3.16508	3.82832	3.02423	1.77257	0	3.82832	CHROMOSOME_V	16462417	16466336	+	WBGene00011619		cds
F36D3.5	6	0	0	0	2.13706	3.69456	3.25567	4.55391	3.77377	2.07798	0	4.55391	CHROMOSOME_V	16510348	16515039	-	WBGene00009471		cds
C05D11.5	6	0	0	0	1.36105	2.39208	2.16177	2.6523	2.62251	0.852432	0	2.6523	CHROMOSOME_III	6409983	6411506	-	WBGene00015483		cds
F44D12.8	6	0	0	0	2.44493	4.35008	3.96791	4.51209	4.40802	1.38465	0	4.51209	CHROMOSOME_IV	10023300	10025249	+	WBGene00009685		cds
C34B2.3	6	0	0.493092	0.282331	2.29942	4.29256	4.66899	4.8368	4.60658	2.07798	0	4.8368	CHROMOSOME_I	10672726	10674847	+	WBGene00016388		cds
Y73B6BL.7	6	0	0	0	1.62813	3.20805	3.3409	3.56036	3.44696	1.38465	0	3.56036	CHROMOSOME_IV	6307728	6315708	+	WBGene00000820	csp-2	cds
W02B12.7	6	0	0.586849	0	2.59824	4.59135	4.65648	5.02116	4.86515	1.77257	0	5.02116	CHROMOSOME_II	11465875	11467577	-	WBGene00002227	klp-17	cds
F37C12.18	6	0	0	0	2.59824	4.14836	4.35335	4.72478	4.676	2.07798	0	4.72478	CHROMOSOME_III	7194032	7195362	-	WBGene00044005		cds
K09G1.2	6	0	0.32306	0	3.29306	5.03613	4.95088	5.33596	4.99552	2.3299	0	5.33596	CHROMOSOME_V	9590609	9591232	+	WBGene00010728		cds
C05D2.3	6	0	0.32306	0.282331	1.85402	3.75417	3.80412	4.052	3.39412	1.77257	0	4.052	CHROMOSOME_III	5614930	5617230	+	WBGene00015467		cds
R11A8.8	6	0	0	0	1.66867	3.75281	4.02053	3.9584	3.59704	1.77257	0	4.02053	CHROMOSOME_IV	10372645	10374572	-	WBGene00011241		cds
Y47D3A.5	6	0	0	0	1.78258	3.98927	3.99387	4.17606	3.49519	1.77257	0	4.17606	CHROMOSOME_III	11168767	11170462	-	WBGene00012924		cds
C35D10.3	6	0	0	0	1.78258	3.66236	3.29795	3.81309	3.33926	1.38465	0	3.81309	CHROMOSOME_III	4868893	4870060	+	WBGene00016441		cds
W08D2.8	6	0	0	0	1.45595	3.60175	3.42138	3.8972	3.44909	1.38465	0	3.8972	CHROMOSOME_IV	9832915	9834802	+	WBGene00002204	kin-21	cds
F47F6.5	6	0	0	0.282331	1.95466	4.27255	3.77448	4.16015	4.35294	2.07798	0	4.35294	CHROMOSOME_II	1255599	1258360	+	WBGene00018575	clec-119	cds
T22C1.8	6	0	0	0.721132	2.24683	4.87746	4.51693	4.8368	4.78278	2.07798	0	4.87746	CHROMOSOME_I	7955973	7958500	-	WBGene00011918		cds
F59C6.3	6	0.530369	0.32306	0.749507	2.07861	4.34963	4.51775	4.82287	4.90554	2.5443	0	4.90554	CHROMOSOME_I	10524431	10525475	+	WBGene00010324		cds
R07B7.4	6	0	0	0.282331	1.85402	3.5074	3.61483	3.55121	3.73296	1.77257	0	3.73296	CHROMOSOME_V	12065941	12067938	-	WBGene00011088		cds
ZK1053.2	6	0	0	0	2.32456	4.54265	5.02832	4.61214	5.10126	2.55562	0	5.10126	CHROMOSOME_I	13232146	13234673	+	WBGene00014197		cds
T13A10.1	6	0	0.32306	0	1.95466	4.08119	4.68935	4.52616	4.32498	2.3299	0	4.68935	CHROMOSOME_IV	6276383	6276959	+	WBGene00020468		cds
T28C6.5	6	0	0	0	1.45595	3.12225	3.84879	3.31618	3.39412	1.77257	0	3.84879	CHROMOSOME_IV	8821434	8822787	+	WBGene00012120		cds
B0261.5	6	0	0	0.55096	1.78258	2.8799	3.69613	3.80542	3.02423	1.77257	0	3.80542	CHROMOSOME_I	5249775	5250440	-	WBGene00015093		cds
F58F12.3	6	0	0	0.282331	1.45595	2.5341	2.86859	3.41345	2.87742	1.38465	0	3.41345	CHROMOSOME_II	6389278	6391224	-	WBGene00019063		cds
C06E7.6	6	0	0	0	1.36105	2.0675	2.94078	3.21188	2.52554	1.38465	0	3.21188	CHROMOSOME_IV	5864518	5865891	-	WBGene00004973	spe-27	cds
F35E2.9	6	0	0	0.898892	2.96298	3.83825	4.99188	4.71252	4.74338	2.07798	0	4.99188	CHROMOSOME_I	11723404	11726273	-	WBGene00009416		cds
ZC581.10	6	0	0	0.55096	2.10839	3.69632	4.08892	4.02808	3.77462	1.77257	0	4.08892	CHROMOSOME_I	6642737	6643416	-	WBGene00195178		cds
K04C2.8	6	0	0.32306	0.721132	1.88815	3.16528	4.05793	4.07351	4.00499	2.07798	0	4.07351	CHROMOSOME_III	6870282	6871071	+	WBGene00044312		cds
F44F1.3	6	0	0	0	1.20635	1.9703	2.78185	2.66931	3.39485	0.852432	0	3.39485	CHROMOSOME_I	13254130	13257720	+	WBGene00009695		cds
T07D3.9	6	0	0	0	0.90434	1.37881	2.06714	1.87995	2.42158	0.852432	0	2.42158	CHROMOSOME_II	898051	900937	-	WBGene00020311		cds
Y57G7A.6	6	0.400478	0.493092	0	2.46768	3.89139	5.13135	5.36414	5.59032	1.77257	0	5.59032	CHROMOSOME_II	1281981	1285592	-	WBGene00021969		cds
Y59E9AR.10	6	0	0	0	2.01824	3.39909	4.09003	3.78995	4.35503	1.38465	0	4.35503	CHROMOSOME_IV	5248570	5248930	+	WBGene00044498		cds
Y59E9AR.9	6	0.400478	0	0	2.01824	3.36214	4.10851	3.76912	4.35465	1.77257	0	4.35465	CHROMOSOME_IV	5242276	5242636	-	WBGene00044497		cds
Y43F8C.5	6	0.713599	0	0.55096	2.9789	4.12649	5.54818	5.8466	5.98453	2.73092	0	5.98453	CHROMOSOME_V	19631339	19632628	-	WBGene00012827		cds
Y43F8C.9	6	1.05949	0.32306	0.55096	2.87999	4.40497	5.63249	6.00663	6.04577	3.52005	0	6.04577	CHROMOSOME_V	19646062	19647310	+	WBGene00012831		cds
B0286.1	6	0	0.32306	0	0.90434	2.8799	3.4109	3.44343	3.09216	0.852432	0	3.44343	CHROMOSOME_II	4378659	4386355	+	WBGene00015115		cds
F48A9.3	6	0	0	0	1.09281	2.98663	3.59644	3.74799	3.28343	0.852432	0	3.74799	CHROMOSOME_I	6585040	6587883	+	WBGene00006624	try-6	cds
F55H12.1	6	0	0	0	1.20635	3.63532	4.36426	4.08407	3.89622	0.852432	0	4.36426	CHROMOSOME_I	8871832	8875246	+	WBGene00004901	snf-2	cds
T01C3.5	6	0	0	0.282331	1.20635	3.72536	4.31641	4.44465	3.97104	1.38465	0	4.44465	CHROMOSOME_V	14996574	14998097	+	WBGene00011322		cds
H38K22.7	6	0	0	0	1.20635	2.46359	3.5794	3.23491	2.95244	0.852432	0	3.5794	CHROMOSOME_III	4321721	4322840	+	WBGene00044912		cds
Y39B6A.18	6	0	0	0.282331	2.10839	3.86208	5.23146	4.60331	4.23522	1.38465	0	5.23146	CHROMOSOME_V	19068592	19074057	-	WBGene00012679		cds
C35A5.4	6	0	0.32306	0.55096	1.50076	2.77403	3.82139	3.61406	3.7749	0.852432	0	3.82139	CHROMOSOME_V	10497036	10499387	+	WBGene00007948		cds
C46H11.6	6	0	0	0.924006	1.45595	3.2491	4.27369	4.182	3.81704	0.852432	0	4.27369	CHROMOSOME_I	5020877	5023166	+	WBGene00016730		cds
C46H11.11	6	0	0	0.721132	0.969555	3.60439	4.13208	4.04773	4.29548	1.38465	0	4.29548	CHROMOSOME_I	5058254	5068832	-	WBGene00016735	fhod-1	cds
ZK39.10	6	0	0	0.55096	0.90434	3.07628	3.11864	3.26497	2.95294	0.852432	0	3.26497	CHROMOSOME_I	11160026	11162566	+	WBGene00050881		cds
F35H10.2	6	0	0	0.749507	1.20635	3.43723	3.77448	4.58255	4.46248	0.852432	0	4.58255	CHROMOSOME_IV	8329212	8329853	+	WBGene00018068		cds
C24F3.5	6	0.530369	0	0	1.20635	3.16528	3.74421	3.7926	4.26455	0.852432	0	4.26455	CHROMOSOME_IV	10206171	10214889	-	WBGene00000019	abt-1	cds
F16C3.4	6	0.400478	0	0	0.90434	2.77403	3.3519	3.48245	3.68856	1.38465	0	3.68856	CHROMOSOME_I	10158941	10160367	+	WBGene00044243		cds
ZK829.2	6	0.530369	0	0	0.90434	3.12278	3.77586	4.18791	4.07381	1.38465	0	4.18791	CHROMOSOME_IV	11946083	11949794	-	WBGene00001839	hdl-1	cds
C31H1.5	6	0	0	0.282331	1.45595	3.72709	4.55391	4.94884	4.67751	1.77257	0	4.94884	CHROMOSOME_IV	5794921	5796751	-	WBGene00016288		cds
F42G8.9	6	0	0	0	1.20635	2.71873	3.40212	3.63722	3.77264	1.38465	0	3.77264	CHROMOSOME_IV	8115754	8118431	+	WBGene00018360		cds
C54D10.4	6	0	0	0	1.20635	3.80718	4.05233	4.3229	4.1417	1.77257	0	4.3229	CHROMOSOME_V	12419393	12420925	-	WBGene00008299		cds
F31E8.5	6	0	0	0	1.85402	4.55829	4.9983	5.43037	5.45506	2.3299	0	5.45506	CHROMOSOME_II	6805022	6807202	-	WBGene00017955		cds
F43G6.6	6	0	0	0	1.20635	3.29042	3.68023	3.93749	3.73267	1.38465	0	3.93749	CHROMOSOME_II	11806504	11808766	+	WBGene00005013		cds
W03D8.1	6	0	0	0	1.36105	3.20656	3.66416	3.80804	3.81621	1.38465	0	3.81621	CHROMOSOME_I	2787857	2790333	-	WBGene00020984		cds
C43F9.6	6	0.400478	0	0	2.42181	4.94074	5.41605	5.88044	5.99283	2.3299	0	5.99283	CHROMOSOME_IV	10590912	10592959	+	WBGene00008074	nkb-2	cds
T08B6.9	6	0	0	0	2.01824	4.01387	4.46641	4.91958	4.93978	1.77257	0	4.93978	CHROMOSOME_IV	4890836	4894079	+	WBGene00020356		cds
F10F2.7	6	0	0	0.51835	2.34928	4.40497	5.10828	5.34309	5.33113	2.07798	0	5.34309	CHROMOSOME_III	4628413	4631102	+	WBGene00008659	clec-151	cds
C53B4.2	6	0	0	0	1.36105	3.69279	3.47098	4.27003	4.10883	1.38465	0	4.27003	CHROMOSOME_IV	8966119	8967819	+	WBGene00008272		cds
F22B5.5	6	0	0	0.51835	1.20635	3.66632	3.52539	4.11332	4.29429	1.38465	0	4.29429	CHROMOSOME_II	8453205	8454562	-	WBGene00009043		cds
D1022.9	6	0	0	0	0.90434	2.65615	2.65445	3.28718	3.55016	0.852432	0	3.55016	CHROMOSOME_II	7488197	7489382	-	WBGene00044300		cds
F22B3.8	6	0	0	0.282331	1.20635	2.82923	3.23405	3.0221	3.33849	0.852432	0	3.33849	CHROMOSOME_IV	11422689	11425229	-	WBGene00009039		cds
F28H1.5	6	0	0	0	1.20635	3.32741	3.2121	3.18847	3.93247	0.852432	0	3.93247	CHROMOSOME_I	3978496	3979530	-	WBGene00017910		cds
C06C3.10	6	0	0	0	0.90434	2.65977	3.3519	3.28341	2.71514	1.38465	0	3.3519	CHROMOSOME_II	9375800	9377150	-	WBGene00044169		cds
Y37E3.19	6	0	0	0	1.20635	3.43554	4.12035	3.9044	3.22037	1.77257	0	4.12035	CHROMOSOME_I	2107405	2108632	-	WBGene00044810		cds
M01H9.4	6	0	0.32306	0	1.25947	2.88053	3.37001	3.36564	2.87636	1.38465	0	3.37001	CHROMOSOME_IV	4479686	4482899	-	WBGene00019720		cds
W01B6.6	6	0.400478	0.32306	0	1.20635	3.69491	4.44175	4.65828	4.07473	2.07798	0	4.65828	CHROMOSOME_IV	10081073	10082589	+	WBGene00012173		cds
F26A3.5	6	0.400478	0.493092	0	1.70742	3.24718	4.03426	4.45126	3.7315	1.77257	0	4.45126	CHROMOSOME_I	7668531	7669793	+	WBGene00009143		cds
C10G11.1	6	0	0.32306	0	0.90434	1.86984	2.49498	2.0625	2.42376	0.852432	0	2.49498	CHROMOSOME_I	6307329	6308600	+	WBGene00015685		cds
F56F4.9	6	0	0	0	1.20635	2.93485	3.66416	3.14464	3.44803	1.38465	0	3.66416	CHROMOSOME_I	6146678	6147070	+	WBGene00050896	ttr-56	cds
Y18H1A.10	6	0	0	0	1.45595	3.20904	3.54308	3.04834	3.54983	1.38465	0	3.54983	CHROMOSOME_I	683727	686578	-	WBGene00021214		cds
H38K22.6	6	0	0.32306	0	1.36105	3.63642	4.08892	3.69367	4.04099	1.38465	0	4.08892	CHROMOSOME_III	4320389	4321294	+	WBGene00044911		cds
F38E1.3	6	0	0	0	1.20635	3.3265	3.85654	2.72989	3.5485	1.38465	0	3.85654	CHROMOSOME_V	8376121	8377926	+	WBGene00018178		cds
C14A4.13	6	0	0	0	1.09281	3.83601	3.63895	3.59334	3.73209	2.07798	0	3.83601	CHROMOSOME_II	10618412	10620445	+	WBGene00007563		cds
F54H5.5	6	0	0	0	1.09281	4.44253	4.82373	4.43304	4.23707	2.34302	0	4.82373	CHROMOSOME_II	6623450	6627249	-	WBGene00018841		cds
Y47H9B.2	6	0	0	0	0.90434	2.59755	2.78185	2.5703	2.62062	1.38465	0	2.78185	CHROMOSOME_I	11744163	11747405	+	WBGene00012946		cds
F59A1.15	6	0	0	0	0.90434	2.71803	2.79532	2.44436	3.09353	1.38465	0	3.09353	CHROMOSOME_V	17680635	17683881	-	WBGene00010300		cds
F10D11.5	6	0	0	0	0.521899	2.93545	3.61328	3.02661	3.15791	1.38465	0	3.61328	CHROMOSOME_I	8442720	8444925	-	WBGene00008651		cds
Y37E11AL.12	6	0	0.32306	0	0.90434	2.71873	3.33169	2.95905	3.15617	1.38465	0	3.33169	CHROMOSOME_IV	3701285	3701939	-	WBGene00195010		cds
Y53H1C.3	6	0	0	0	0.90434	3.03438	3.70474	3.47279	3.33964	1.38465	0	3.70474	CHROMOSOME_I	11417835	11421264	+	WBGene00013186		cds
T06E4.5	6	0	0.493092	0	0.90434	2.77002	2.93832	2.89312	2.79661	1.38465	0	2.93832	CHROMOSOME_V	9631216	9632232	+	WBGene00011533		cds
C06B3.4	6	0	0	0	0.763021	2.77603	2.84025	3.55434	2.87583	0.852432	0	3.55434	CHROMOSOME_V	13906476	13908023	+	WBGene00007363	stdh-1	cds
Y51A2B.5	6	0	0	0	0.90434	3.43554	3.55265	4.33179	3.77405	1.38465	0	4.33179	CHROMOSOME_V	18389252	18391249	+	WBGene00013069		cds
T16A1.2	6	0	0	0	0.334793	1.86733	1.79377	2.34922	1.75944	0.852432	0	2.34922	CHROMOSOME_II	2095309	2098676	+	WBGene00020533		cds
T06D4.4	6	0	0	0.282331	0.90434	3.63605	3.25567	3.77967	3.39412	1.38465	0	3.77967	CHROMOSOME_II	3391967	3395034	-	WBGene00020293		cds
F22D3.4	6	0	0	0	0.334793	2.23453	2.42038	2.71917	2.711	0.852432	0	2.71917	CHROMOSOME_II	6924186	6925907	-	WBGene00017700		cds
Y51A2B.4	6	0	0	0	0.521899	2.59905	2.88383	3.00879	3.02756	0.852432	0	3.02756	CHROMOSOME_V	18386224	18389118	-	WBGene00013068		cds
W09C3.2	6	0	0	0	0.521899	3.53889	3.67296	3.74799	3.89257	1.38465	0	3.89257	CHROMOSOME_I	4711429	4713447	+	WBGene00021110		cds
F54B3.2	6	0	0.32306	0	0.763021	3.39953	3.68747	3.83329	3.59736	1.38465	0	3.83329	CHROMOSOME_II	10268114	10269984	-	WBGene00010014		cds
ZK616.61	6	0	0	0.282331	0.521899	3.88924	4.78033	4.58998	4.40546	1.38465	0	4.78033	CHROMOSOME_IV	5405651	5407367	+	WBGene00194816		cds
F38A5.8	6	0	0	0	0	2.46773	2.71812	3.10768	2.62125	0.852432	0	3.10768	CHROMOSOME_IV	6599871	6600480	+	WBGene00018165		cds
K07H8.7	6	0	0.32306	0	0.334793	2.52856	3.01871	3.27612	2.62251	0.852432	0	3.27612	CHROMOSOME_IV	8259234	8259965	-	WBGene00019507		cds
C29E4.17	6	0	0	0	0.334793	2.4611	2.65445	2.68612	2.31346	1.38465	0	2.68612	CHROMOSOME_III	7922442	7922953	+	WBGene00194730		cds
K08E7.4	6	0	0	0	0.334793	2.31775	3.02103	2.97282	2.71218	1.38465	0	3.02103	CHROMOSOME_IV	12570578	12571030	-	WBGene00010672		cds
ZK1248.20	6	0	0	0	0.521899	3.60326	4.66091	4.68911	4.10793	2.3299	0	4.68911	CHROMOSOME_II	5816625	5817285	+	WBGene00044393		cds
R01H2.4	6	0	0	0	0.334793	2.53094	3.1775	3.51724	2.52487	1.38465	0	3.51724	CHROMOSOME_III	7061026	7064178	-	WBGene00019812		cds
T08H10.4	6	0	0	0	0	1.64365	1.98947	2.17774	1.75485	0.852432	0	2.17774	CHROMOSOME_V	4480666	4481532	-	WBGene00020371		cds
C17H12.9	6	0	0	0	0	3.1233	3.32053	3.04834	3.49966	1.38465	0	3.49966	CHROMOSOME_IV	6812095	6815570	+	WBGene00015934	ceh-48	cds
F26H9.8	6	0	0.32306	0	0.521899	2.65615	2.76549	2.55207	3.15791	1.38465	0	3.15791	CHROMOSOME_I	9317728	9327204	+	WBGene00009178	uggt-2	cds
ZC190.7	6	0	0	0	0.521899	3.28809	3.24589	2.99537	3.598	1.38465	0	3.598	CHROMOSOME_V	8686173	8686808	-	WBGene00022541		cds
F07C3.4	6	0.819049	0	0.51835	0.969555	4.20883	4.70799	4.40619	4.63166	2.5443	0	4.70799	CHROMOSOME_V	9234601	9243141	-	WBGene00017195	glo-4	cds
T28F12.1	6	0	0	0	0.763021	3.46903	2.61846	2.66931	2.95294	0.852432	0	3.46903	CHROMOSOME_V	4511963	4517328	+	WBGene00020904		cds
C49C3.20	6	0	0	0	2.16567	3.12225	3.00718	3.91157	4.00692	1.38465	0	4.00692	CHROMOSOME_IV	17316118	17316464	-	WBGene00185097		cds
F23C8.1	6	0	0	0	1.20635	1.97263	1.66449	2.11311	2.87689	0.852432	0	2.87689	CHROMOSOME_I	2446765	2448347	+	WBGene00017731		cds
ZK1290.9	6	0	0	0.55096	0.763021	1.76185	1.69937	1.7043	2.42231	0.852432	0	2.42231	CHROMOSOME_II	7546772	7548081	-	WBGene00022890	fbxa-224	cds
F44F4.3	6	0.530369	1.1113	0	2.16567	3.63016	3.16508	2.87857	2.30955	1.77257	0	3.63016	CHROMOSOME_II	10884669	10885818	-	WBGene00009702		cds
M04F3.3	6	0.819049	2.08073	1.48272	2.97918	4.50703	4.2247	4.30124	3.73296	3.04437	0	4.50703	CHROMOSOME_I	4763242	4765206	-	WBGene00019769		cds
W09C3.1	6	0.530369	2.08073	1.36659	2.97918	4.43853	4.36334	4.25884	3.55016	2.73092	0	4.43853	CHROMOSOME_I	4717624	4719576	+	WBGene00021109		cds
Y39F10C.2	6	0	0.493092	0.282331	0.763021	1.37706	1.33585	1.46583	1.3717	0.852432	0	1.46583	CHROMOSOME_II	678001	678354	+	WBGene00194705		cds
F08F8.1	6	0	0	0	0.90434	2.24035	1.69937	1.17999	1.91759	0.852432	0	2.24035	CHROMOSOME_III	7364542	7366432	+	WBGene00017267	numr-2	cds
K08F8.5	6	0.530369	0	0	1.95466	3.46903	2.61846	2.32796	2.70981	1.38465	0	3.46903	CHROMOSOME_II	8767130	8769252	+	WBGene00010682		cds
Y43C5B.2	6	0	0	0	2.10787	2.88362	3.36099	1.63672	3.02614	1.77257	0	3.36099	CHROMOSOME_IV	10351410	10352261	-	WBGene00012785		cds
B0207.11	6	0	0	0.282331	0	2.82987	3.97384	3.7102	4.03934	2.07798	0	4.03934	CHROMOSOME_I	5962954	5964128	-	WBGene00015034		cds
Y39F10C.3	6	0	0	0	0	2.98548	3.79074	4.10922	3.85503	2.07798	0	4.10922	CHROMOSOME_II	674433	674942	+	WBGene00206368		cds
Y57G11B.3	6	0	0	0	0	2.53173	3.04378	3.08683	3.15964	1.77257	0	3.15964	CHROMOSOME_IV	14573519	14574311	-	WBGene00013296		cds
ZK892.3	6	0	0.32306	0.282331	0	2.83244	3.55265	4.04344	3.59832	2.07798	0	4.04344	CHROMOSOME_II	10001787	10003912	+	WBGene00014127		cds
Y59H11AM.4	6	0	0	0	0.521899	2.93485	4.39912	4.353	4.2937	2.3299	0	4.39912	CHROMOSOME_IV	8569180	8569968	-	WBGene00022008		cds
Y71G12B.17	6	0	0	0.282331	0.521899	3.63642	4.85756	4.66811	4.40656	3.04437	0	4.85756	CHROMOSOME_I	1667503	1669776	+	WBGene00022155		cds
F02E9.3	6	0	0.32306	0	0.521899	3.20805	4.2247	4.482	4.73962	2.89614	0	4.73962	CHROMOSOME_I	8404541	8405949	-	WBGene00008529		cds
K02E11.1	6	0	0.586849	0.51835	0.521899	4.29326	5.19324	5.27255	5.61339	3.41502	0	5.61339	CHROMOSOME_V	14232264	14236037	-	WBGene00010510	ent-3	cds
Y116F11B.14	6	0	0.493092	0.282331	0.521899	2.98548	3.58716	3.83587	4.04264	2.5443	0	4.04264	CHROMOSOME_V	19899460	19900260	+	WBGene00013829		cds
Y57G11C.52	6	0.530369	0.859903	0.749507	1.20635	4.40583	5.617	5.42702	5.71657	4.03133	0	5.71657	CHROMOSOME_IV	14853971	14854411	+	WBGene00044741		cds
C48E7.8	6	0.400478	0	0	0.90434	3.02992	3.40212	4.03033	4.29607	2.3299	0	4.29607	CHROMOSOME_I	6265693	6269075	-	WBGene00016753	oac-9	cds
F10F2.8	6	0	0	0	0.90434	3.66704	4.80253	5.27906	5.44174	3.04437	0	5.44174	CHROMOSOME_III	4635297	4637501	+	WBGene00008660	clec-153	cds
M7.7	6	0	0	0	0.90434	3.07628	3.78938	4.10709	4.14016	2.3299	0	4.14016	CHROMOSOME_IV	11089941	11091814	+	WBGene00010883		cds
T22C1.9	6	0.400478	0	0.282331	1.20635	4.03582	5.01224	5.17287	5.61315	3.30173	0	5.61315	CHROMOSOME_I	7958688	7960013	+	WBGene00011919		cds
F52F12.5	6	0.530369	0.32306	0	0.90434	3.94146	4.47147	4.671	4.95823	2.5443	0	4.95823	CHROMOSOME_I	9921202	9921929	-	WBGene00009938		cds
ZK1290.6	6	0	0	0	1.20635	4.0116	4.41753	4.53547	5.11553	2.55562	0	5.11553	CHROMOSOME_II	7525718	7528194	+	WBGene00022888		cds
F18A12.6	6	0.530369	0	0	0.521899	3.03383	3.54308	3.86317	3.73296	2.3299	0	3.86317	CHROMOSOME_II	3399757	3402928	-	WBGene00017555		cds
ZC581.6	6	0	0	0	0.521899	3.16324	3.6224	3.88518	3.93043	2.5443	0	3.93043	CHROMOSOME_I	6640654	6642644	-	WBGene00006625	try-7	cds
B0511.11	6	0.530369	0.859903	0.55096	1.20635	3.54046	4.77216	4.65401	5.67976	2.73092	0	5.67976	CHROMOSOME_I	10648590	10654168	-	WBGene00015236		cds
M02G9.4	6	0	0.32306	0	0.90434	2.77737	3.80547	3.93286	4.92263	2.73092	0	4.92263	CHROMOSOME_II	10317209	10317527	+	WBGene00194935		cds
F14E5.4	6	0	0	0	0.521899	2.31775	2.92613	4.13185	4.1428	2.3299	0	4.1428	CHROMOSOME_II	8429939	8432003	-	WBGene00008802	acp-2	cds
[truncated: 7,179 more rows]
